# Supplementary material for: Nitric oxide responses in Arabidopsis hypocotyls are mediated by diverse phytohormone pathways
Source: PubMed Central journal article supplement (PMC6184486; doi:10.1093/jxb/ery286), 2018-08-02
Supplement: ery286_suppl_supplementary_figures-s1-s3_tables-s1-s5.pdf [file ery286_suppl_supplementary_figures-s1-s3_tables-s1-s5.pdf]

## Supplementary data

**Title:** Nitric oxide responses in Arabidopsis hypocotyls are mediated by diverse phytohormone pathways

**Authors:** Mari-Cruz Castillo<sup>§</sup>, Alberto Coego<sup>§</sup>, Álvaro Costa-Broseta<sup>§</sup>, José León

**Affiliation:** Instituto de Biología Molecular y Celular de Plantas (Consejo Superior de Investigaciones Científicas–Universidad Politécnica de Valencia),  
46022 Valencia, Spain

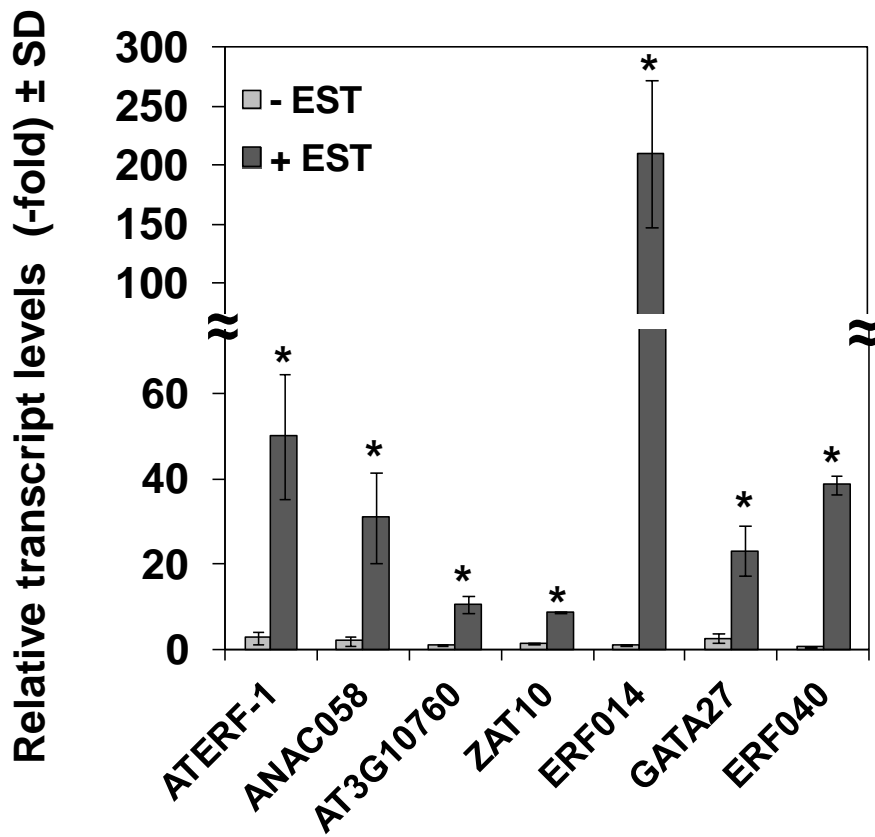

**Supplementary Fig. S1.**  $\beta$ -estradiol induced transcript accumulation in randomly selected TRANSPLANTA transgenic lines. The relative transcript levels were analyzed by RT-qPCR from RNAs obtained at the indicated times after NO exposure of seedlings. Values are normalized to the levels in wild type plant and represent the mean  $\pm$  SD of three independent replicates. \* representing p-values  $< 0.005$  in Student's t-test.

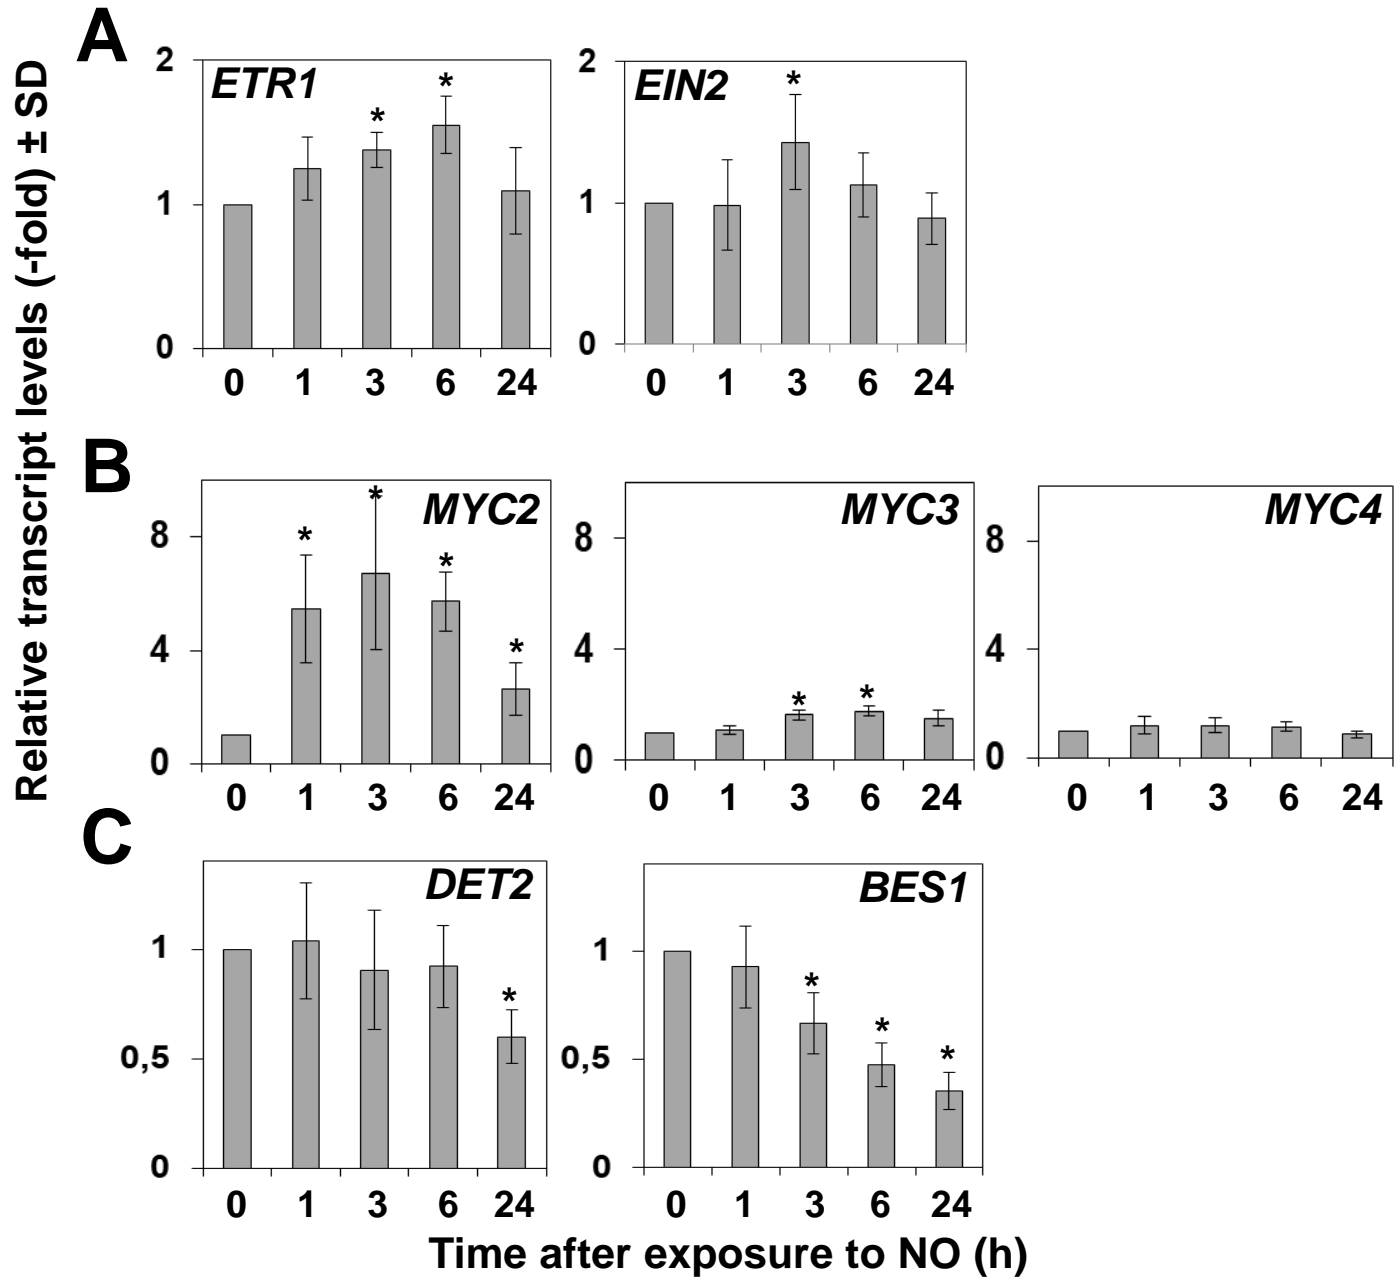

**Supplementary Fig. S2.** Effect of NO treatment on the transcript levels of A, ethylene, B, jasmonate and C, brassinosteroid biosynthetic/or signaling encoding genes. The relative transcript levels were analyzed by RT-qPCR from RNAs obtained at the indicated times after NO exposure of seedlings. Values are the mean  $\pm$  SD of three independent replicates. \* representing p-values  $<0.05$  in Student's t-test.

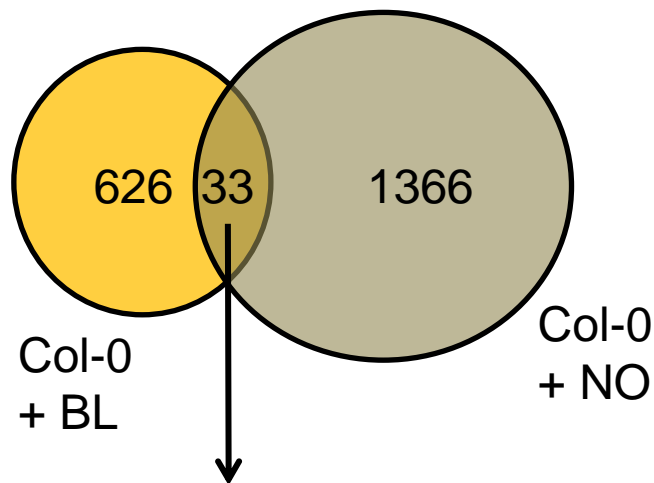

At4g31800 ATWRKY18\_WRKY18\_\_WRKY DNA-binding protein 18  
 At4g25810 XTH23\_XTR6\_\_xyloglucan endotransglycosylase 6  
 At3g26085 CAAX amino terminal protease family protein  
 At5g15850 ATCOL1\_BBX2\_COL1\_\_CONSTANS-like 1  
 At3g28340 GATL10\_GolS8\_\_galacturonosyltransferase-like 10  
 At5g13220 JAS1\_JAZ10\_TIFY9\_\_jasmonate-zim-domain protein 10  
 At3g60160 ABCC9\_ATMRP9\_MRP9\_\_multidrug resistance-associated protein 9  
 At4g11280 ACS6\_ATACS6\_\_1-aminocyclopropane-1-carboxylic acid (acc) synthase 6  
 At1g75460 ATP-dependent protease La (LON) domain protein  
 At1g24280 G6PD3\_\_glucose-6-phosphate dehydrogenase 3  
 At4g37980 ATCAD7\_CAD7\_ELI3\_ELI3-1\_\_elicitor-activated gene 3-1  
 At4g27970 SLAH2\_\_SLAC1 homologue 2  
 At1g32920 Unknown  
 At5g45340 CYP707A3\_\_cytochrome P450, family 707, subfamily A, polypeptide 3  
 At1g01420 UGT72B3\_\_UDP-glucosyl transferase 72B3  
 At1g55545 Unknown  
 At2g26530 AR781\_\_Protein of unknown function (DUF1645)  
 At4g30280 ATXTH18\_XTH18\_\_xyloglucan endotransglucosylase/hydrolase 18  
 At1g23080 ATPIN7\_PIN7\_\_Auxin efflux carrier family protein  
 At5g15950 Adenosylmethionine decarboxylase family protein  
 At5g63470 NF-YC4\_\_nuclear factor Y, subunit C4  
 At1g17990 Putative 12-oxophytodienoate reductase-like protein 2A  
 At5g64780 Uncharacterised conserved protein UCP009193  
 At4g25780 CAP (C-rich secretory, Antigen 5, and Pathogenesis-related 1) superfamily protein  
 At3g57450 Unknown  
 At5g65300 Unknown  
 At1g29460 SAUR65\_\_SAUR-like auxin-responsive protein family  
 At3g50560 NAD(P)-binding Rossmann-fold superfamily protein  
 At2g04240 XERICO\_\_RING/U-box superfamily protein  
 At3g23550 MATE efflux family protein  
 At2g04230 FBD, F-box and Leucine Rich Repeat domains containing protein  
 At3g49620 DIN11\_\_2-oxoglutarate (2OG) and Fe(II)-dependent oxygenase superfamily protein  
 At1g10550 XET\_XTH33\_\_xyloglucan:xyloglucosyl transferase 33

Involved in ABA signaling, ethylene biosynthesis, auxin signaling, jasmonate signaling, cell wall loosening and cell elongation besides NO- and BR-triggered responses

**Supplementary Fig. S3.** Genes up-regulated by either brassinolide (BL) or NO treatments. The color codes corresponded to the functional categories outlined at the end of the table.

| <b>Supplementary Table S1. Oligonucleotides used in this work.</b> |                                 |            |                    |
|--------------------------------------------------------------------|---------------------------------|------------|--------------------|
| <b>Name</b>                                                        | <b>Sequence (5' to 3')</b>      | <b>AGI</b> | <b>Application</b> |
| qP-ACT2-R                                                          | TGTCTCGTGGATTCCAGCAG            | AT3G18780  | qRT-PCR            |
| qP-ACT2-F                                                          | TTGTTCCAGCCCTCGTTTGT            | AT3G18780  | qRT-PCR            |
| qPYR1-R                                                            | CGTCGTACGATTGACCAGACGAG         | AT4G17870  | qRT-PCR            |
| qPYR1-F                                                            | GCCTTCGGAGTTAACACCAGAAG         | AT4G17870  | qRT-PCR            |
| qPYL1-R                                                            | GGGAGAGTTGGGTGAATTTCG           | AT5G46790  | qRT-PCR            |
| qPYL1-F                                                            | GGCGAATTCAGAGTCCTCCTCC          | AT5G46790  | qRT-PCR            |
| qPYL2-R                                                            | GCCGACGACCCTGAAGCT              | AT2G26040  | qRT-PCR            |
| qPYL2-F                                                            | CAGTACCGAGCGGCTTGAG             | AT2G26040  | qRT-PCR            |
| qPYL3-R                                                            | CGAAGTCGCGGACGAATCT             | AT1G73000  | qRT-PCR            |
| qPYL3-F                                                            | CATCACTCATAGCACACCGTGTAG        | AT1G73000  | qRT-PCR            |
| qPYL4-R                                                            | CGCGATCATCATCGGAATC             | AT2G38310  | qRT-PCR            |
| qPYL4-F                                                            | GCTTGCCGTTACCCGTCCTTC           | AT2G38310  | qRT-PCR            |
| qPYL5-F                                                            | GGTCACCGGTGCAACTCC              | AT5G05440  | qRT-PCR            |
| qPYL5-R                                                            | CGCGTGGATCATCTGCACC             | AT5G05440  | qRT-PCR            |
| qPYL6-R                                                            | CCTCCACGTCTTGTACCACG            | AT2G40330  | qRT-PCR            |
| qPYL6-F                                                            | CCAACGTTCGATACAGTTTCAG          | AT2G40330  | qRT-PCR            |
| qPYL7-R                                                            | AGTGGTGAAGATGACGCAACCT          | AT4G01026  | qRT-PCR            |
| qPYL7-F                                                            | GATCGGAGGAGACGATACAGATACA       | AT4G01026  | qRT-PCR            |
| qPYL8-R                                                            | CGGCTTATACTTCTGTGGC             | AT5G53160  | qRT-PCR            |
| qPYL8-F                                                            | GGAAGCTAACGGGATTGAG             | AT5G53160  | qRT-PCR            |
| qPYL9-R                                                            | ATGCGTCCGTACGTATTGCA            | AT1G01360  | qRT-PCR            |
| qPYL9-F                                                            | GATATGATGGACGGCGTTGAA           | AT1G01360  | qRT-PCR            |
| qHAI1-R                                                            | CTCGCACCGGCATTTTG               | AT5G59220  | qRT-PCR            |
| qHAI1-F                                                            | ACGCGCATGGACATGGA               | AT5G59220  | qRT-PCR            |
| qHAI2-R                                                            | ACACATGCGCACCATCGTA             | AT1G07430  | qRT-PCR            |
| qHAI2-F                                                            | GCGACGGACGGGCTATG               | AT1G07430  | qRT-PCR            |
| qHAI3-F                                                            | CCGTCGTCCGTTTATGAATCA           | AT2G29380  | qRT-PCR            |
| qHAI3-R                                                            | TGCATCACCGTTTGAATCTC            | AT2G29380  | qRT-PCR            |
| qHAB2-R                                                            | CCCACCAGCCGTTTATTCTC            | AT1G17550  | qRT-PCR            |
| qHAB2-F                                                            | CTGTTTCAGCGGAGGTACATACTTC       | AT1G17550  | qRT-PCR            |
| qHAB1-R                                                            | CTGAGTGATCTCGACAGGTGATG         | AT1G72770  | qRT-PCR            |
| qHAB1-F                                                            | TCCCGCAGTTGCAATGACT             | AT1G72770  | qRT-PCR            |
| qABI2-R                                                            | CACCGTTGCAATAGCCTCTAAGT         | AT5G57050  | qRT-PCR            |
| qABI2-F                                                            | CTGCAGTCGCTGTTCCATTC            | AT5G57050  | qRT-PCR            |
| qAB1-F                                                             | TTCTCCGAAACCCAGATGGA            | AT4G26080  | qRT-PCR            |
| qABI1-R                                                            | CGTTCTCGGAATCTTGATTTGAG         | AT4G26080  | qRT-PCR            |
| qAHG1-F                                                            | CGAGGGAGGCTGCGATTT              | AT5G51760  | qRT-PCR            |
| qAHG1-R                                                            | ACAATAATATGATCGTGCCTCAAAA       | AT5G51760  | qRT-PCR            |
| qAHG3-F                                                            | TTGTTGCGGTGTTGTTGGA             | AT3G11410  | qRT-PCR            |
| qAHG3-R                                                            | AGAGAAGCTCGAGAAGTTGAATCA A      | AT3G11410  | qRT-PCR            |
| qSnRK2.10-R                                                        | ACTACACAAAGTCACAAACCCAGAAA      | AT1G60940  | qRT-PCR            |
| qSnRK2.10-F                                                        | TTCTATCACTTTGTGCCTTTTTTAGC      | AT1G60940  | qRT-PCR            |
| qSnRK2.4-R                                                         | CAAAATCAAGGATGCGATTCC           | AT1G10940  | qRT-PCR            |
| qSnRK2.4-F                                                         | CATCGTCATCTCTTCCCTTT            | AT1G10940  | qRT-PCR            |
| qSnRK2.5-R                                                         | CAATACCTTACAACCTCATACTTGT       | AT5G63650  | qRT-PCR            |
| qSnRK2.5-F                                                         | CAACGAGAGATCGTGATCGTACTT        | AT5G63650  | qRT-PCR            |
| qSnRK2.1-R                                                         | TGGCTTTGACAAATGTGTTTTTCT        | AT5G08590  | qRT-PCR            |
| qSnRK2.1-F                                                         | TGCTCT CTGTTTCTCTTACTTTATTTCTTC | AT5G08590  | qRT-PCR            |
| qSnRK2.7-F                                                         | TTTCTCCGAGTGCAAGCAT             | AT4G40010  | qRT-PCR            |
| qSnRK2.7-R                                                         | GTGCTTTTCGATTTCCGGTACA          | AT4G40010  | qRT-PCR            |
| qSnRK2.8-R                                                         | CGGCGCTGCAGATTCTTC              | AT1G78290  | qRT-PCR            |
| qSnRK2.8-F                                                         | GGCAACACATTTGGCGTTAGT           | AT1G78290  | qRT-PCR            |
| qSnRK2.2-R                                                         | TCAAGATTATCCGCCATGAAATC         | AT3G50500  | qRT-PCR            |
| qSnRK2.2-F                                                         | GCAGATAATATCGGAGGCTACGA         | AT3G50500  | qRT-PCR            |
| qSnRK2.3-R                                                         | ACTGTCGTGCATAATCGGCATA          | AT5G66880  | qRT-PCR            |

|            |                                |           |         |
|------------|--------------------------------|-----------|---------|
| qSnRK2.3-F | TCGAATTTCTCTTTTTGTGATCAGA      | AT5G66880 | qRT-PCR |
| qOST1-R    | TGCTTCTGCAATGATCTGCAT          | AT4G33950 | qRT-PCR |
| qOST1-F    | CACGATGACCACTCAGTTTGATG        | AT4G33950 | qRT-PCR |
| qSnRK2.9-R | CACAAGCTCGTTTGTGTTGCTTATT      | AT2G23030 | qRT-PCR |
| qSnRK2.9-F | GGAGAAGTATGAGATGGTGAAGGATT     | AT2G23030 | qRT-PCR |
| qAIF1-R    | GACGTAGAGCCTCCATCAGC           | AT3G05800 | qRT-PCR |
| qAIF1-F    | ATCGAATCCTTCCACGTCAC           | AT3G05800 | qRT-PCR |
| qBZS1-R    | TCCGGTTCTCTCTCACTTCTC          | AT4G39070 | qRT-PCR |
| qBZS1-F    | CCGGTAAGGAGGAATCTATTGTG        | AT4G39070 | qRT-PCR |
| qDET2-F    | TCCTCAATGGTTATATCCAGGCGA       | AT2G38050 | qRT-PCR |
| qDET2-R    | TCTTCAATCGTACCAAAGTCCGGT       | AT2G38050 | qRT-PCR |
| qBES1-F    | AACTACCCGTTTTATGCGGTGTCTG      | AT1G19350 | qRT-PCR |
| qBES1-R    | GTTGGCACCATAGAGGCAGAGAAT       | AT1G19350 | qRT-PCR |
| qWRKY70-R  | TGGGAGTTTCTGCGTTGG             | AT3G56400 | qRT-PCR |
| qWRKY70-F  | AAAAGATTGGGACCCGTTAA           | AT3G56400 | qRT-PCR |
| qMYC2-F    | GTGCGGGATTAGCTGGTAAA           | AT1G32640 | qRT-PCR |
| qMYC2-R    | ATGCATCCCAAACACTCCTC           | AT1G32640 | qRT-PCR |
| qMYC3-F    | TGTTGAAGCAGAGAGGCAGA           | AT5G46760 | qRT-PCR |
| qMYC3-R    | CTCCGAGAAGCGAAGCTTTA           | AT5G46760 | qRT-PCR |
| qMYC4-F    | AGGAGCAAACGAGAACTGGA           | AT4G17880 | qRT-PCR |
| qMYC4-R    | CCATCTCCCAACCTAACAA            | AT4G17880 | qRT-PCR |
| qJAZ1-F    | AGCTTCACTTCACCGTTCTTGGA        | AT1G19180 | qRT-PCR |
| qJAZ1-R    | TCTTGTCTTGAAGCAACGTCGTCA       | AT1G19180 | qRT-PCR |
| qJAZ3-F    | TGTAATGGCTCCAACAGTGGCATTAC     | AT3G17860 | qRT-PCR |
| qJAZ3-R    | ATTCAGACATTGATCTGCGACAATCTGT   | AT3G17860 | qRT-PCR |
| qJAZ6-F    | TCATCTTCCTCCAAGCCAGAGAT        | AT1G72450 | qRT-PCR |
| qJAZ6-R    | ACTAGAAACGTGAACTCGATCGTGCAT    | AT1G72450 | qRT-PCR |
| qJAZ10-F   | TCGCAAGGAGAAAGTCACTGCAAC       | AT5G13220 | qRT-PCR |
| qJAZ10-R   | CGATTTAGCAACGACGAAGAAGGC       | AT5G13220 | qRT-PCR |
| qLOX3-F    | CGGATAGAGAAAGAGATTGAGAAAAGGAAC | AT1G17420 | qRT-PCR |
| qLOX3-R    | AGGTACACCTCTACACGTAACACCAGGC   | AT1G17420 | qRT-PCR |
| qMAX1-F    | GGCCCTATTTTCAGATTTTCAG         | AT2G26170 | qRT-PCR |
| qMAX1-R    | TGGTGAAGAAGAGGCCTTTC           | AT2G26170 | qRT-PCR |
| qMAX2-F    | CCGGAGAACGATATGAGCAC           | AT2G42620 | qRT-PCR |
| qMAX2-R    | CAAGTTTCAGTCAATGATGTTGC        | AT2G42620 | qRT-PCR |
| qMAX4-F    | GTTTTACCCGATGCTAGGATC          | AT4G32810 | qRT-PCR |
| qMAX4-R    | TGATGCTGCACATATCCATCG          | AT4G32810 | qRT-PCR |
| qETR1-F    | TTCCCCGACATTCAAATTTTCAC        | AT1G66340 | qRT-PCR |
| qETR1-R    | GTGGATTTGTCAGTGTTACCAC         | AT1G66340 | qRT-PCR |
| qEIN2-F    | TGAGACCTCAGCTAGGGTTTATC        | AT5G03280 | qRT-PCR |
| qEIN2-R    | TAAGTGCATGCGCAACTCCCAC         | AT5G03280 | qRT-PCR |

**Supplemental Table S2.** Microarray analyses for identifying the early NO-responsive transcriptome.

**Description of microarray experiments according to MIAME**

| <b>Investigation Design Format (IDF)</b> |                                                                                                                                                                                                                                                                                                                                                                                                                                                                                                                                                                                                                                                                                                                                                      |
|------------------------------------------|------------------------------------------------------------------------------------------------------------------------------------------------------------------------------------------------------------------------------------------------------------------------------------------------------------------------------------------------------------------------------------------------------------------------------------------------------------------------------------------------------------------------------------------------------------------------------------------------------------------------------------------------------------------------------------------------------------------------------------------------------|
| Investigation title                      | IBMCP JLeon lab NO-exposed (15, 30 and 60 min after pulse of 300 ppm NO during 5 min) wt Col-0 versus untreated wt Col -0                                                                                                                                                                                                                                                                                                                                                                                                                                                                                                                                                                                                                            |
| Experimental designs                     | NO-treated vs untreated wild type Col-0 seedlings                                                                                                                                                                                                                                                                                                                                                                                                                                                                                                                                                                                                                                                                                                    |
| Person Last Name                         | León                                                                                                                                                                                                                                                                                                                                                                                                                                                                                                                                                                                                                                                                                                                                                 |
| Person First Name                        | José                                                                                                                                                                                                                                                                                                                                                                                                                                                                                                                                                                                                                                                                                                                                                 |
| E-mail                                   | <a href="mailto:jleon@ibmcp.upv.es">jleon@ibmcp.upv.es</a>                                                                                                                                                                                                                                                                                                                                                                                                                                                                                                                                                                                                                                                                                           |
| Telephone                                | (+34)96387782                                                                                                                                                                                                                                                                                                                                                                                                                                                                                                                                                                                                                                                                                                                                        |
| Affiliation & Address                    | IBMCP (CSIC-UPV), CPI Edificio 8E, Ingeniero Fausto Elio s/n, 46022 Valencia (Spain)                                                                                                                                                                                                                                                                                                                                                                                                                                                                                                                                                                                                                                                                 |
| Person role                              | Investigator, submitter                                                                                                                                                                                                                                                                                                                                                                                                                                                                                                                                                                                                                                                                                                                              |
| Replicate types                          | 3 independent biological replicates per genotype                                                                                                                                                                                                                                                                                                                                                                                                                                                                                                                                                                                                                                                                                                     |
| Experiment description                   | <p>1. Type of experiment:<br/>Compared analysis of the transcriptomes of 12-day old seedlings from wild type Col-0 treated with NO for 15, 30 and 60 min vs untreated control seedlings.</p> <p>2. Experimental factors:<br/>Samples were harvested 12 h after dawn of day 12 after sowing and seedlings were grown under long days (16 h light / 8 h darkness) photoperiodic conditions.</p> <p>3. Number of hybridizations to Arabidopsis Nimblegen-Roche microarrays (GPL13970):<br/>12 distributed as 3 independent biological replicates of untreated, NO-treated 15 min, NO-treated 30 min and NO-treated 60 min.</p> <p>4. Goals of proposed experiments:<br/>Identification of the differential transcriptome affected by a pulse of NO.</p> |

**Sample and Data Relationship Format (SDRF)**

| 1. Hybridization design: |                            |          |                                    |           |
|--------------------------|----------------------------|----------|------------------------------------|-----------|
| #                        | Label                      | Genotype | Growth conditions                  | Tissue    |
| 1                        | Réplica 1 Col0             | Col-0    | MS media plus 1 % sucrose, 12 days | Seedlings |
| 2                        | Réplica 1 Col0 (NO) 15 min | Col-0    | MS media plus 1 % sucrose, 12 days | Seedlings |
| 3                        | Réplica 1 Col0 (NO) 30 min | Col-0    | MS media plus 1 % sucrose, 12 days | Seedlings |
| 4                        | Réplica 1 Col0 (NO) 60 min | Col-0    | MS media plus 1 % sucrose, 12 days | Seedlings |
| 5                        | Réplica 2 Col0             | Col-0    | MS media plus 1 % sucrose, 12 days | Seedlings |
| 6                        | Réplica 2 Col0 (NO) 15 min | Col-0    | MS media plus 1 % sucrose, 12 days | Seedlings |
| 7                        | Réplica 2 Col0 (NO) 30 min | Col-0    | MS media plus 1 % sucrose, 12 days | Seedlings |
| 8                        | Réplica 2 Col0 (NO) 60 min | Col-0    | MS media plus 1 % sucrose, 12 days | Seedlings |



|                                                                                                                                                                                                                                                                                                                          |                            |       |                                    |           |
|--------------------------------------------------------------------------------------------------------------------------------------------------------------------------------------------------------------------------------------------------------------------------------------------------------------------------|----------------------------|-------|------------------------------------|-----------|
| 9                                                                                                                                                                                                                                                                                                                        | Réplica 3 Col0             | Col-0 | MS media plus 1 % sucrose, 12 days | Seedlings |
| 10                                                                                                                                                                                                                                                                                                                       | Réplica 3 Col0 (NO) 15 min | Col-0 | MS media plus 1 % sucrose, 12 days | Seedlings |
| 11                                                                                                                                                                                                                                                                                                                       | Réplica 3 Col0 (NO) 30 min | Col-0 | MS media plus 1 % sucrose, 12 days | Seedlings |
| 12                                                                                                                                                                                                                                                                                                                       | Réplica 3 Col0 (NO) 60 min | Col-0 | MS media plus 1 % sucrose, 12 days | Seedlings |
| 2. RNA extraction:<br>Total RNA from wild type and NO-deficient plants was isolated and purified by the Micro-to-Midi Total RNA Purification System from Invitrogen (Carlsbad, CA, USA).                                                                                                                                 |                            |       |                                    |           |
| 3. Quality controls:<br>RNAs from every genotype were checked by RT-PCR for mRNA levels of the <i>AHB1/GLB1</i> and <i>ACT2</i> genes. Moreover, total RNAs used for further preparation of hybridization probes were analysed to check integrity and purity by nanocapilar electrophoresis in Bioanalyzer Agilent 2100. |                            |       |                                    |           |
| 4. Labeling and hybridization protocols:                                                                                                                                                                                                                                                                                 |                            |       |                                    |           |

RNAs were ligated to an RNA oligonucleotide adaptor (Invitrogen) using T4 RNA ligase (Ambion, <http://www.ambion.com/>). The RNAs were extracted once with phenol-chloroform and non-ligated adaptor was removed by chromatography with MicroSpin S-300 HR columns (GE Healthcare, <http://www.gehealthcare.com/>). Purified ligation products were precipitated in ethanol and used as templates for reverse transcription with Superscript III (Invitrogen) for 3 h at 46°C, using oligonucleotide oligo(dT) as primer. Template RNA was removed by alkaline hydrolysis and first-strand cDNA purified with S.N.A.P. columns (Invitrogen). Second-strand synthesis was performed with Taq DNA polymerase (Roche, <http://www.roche.com/>) for 5 min at 94°C, 5 min; 58°C, 1 min; 72°C, 10 min. A forward oligonucleotide T7-Adap primer, which was complementary to the RNA adaptor and contained the sequence of bacteriophage T7 promoter, was used. Double-stranded cDNA was then purified with MinElute columns (Qiagen) and in vitro transcribed with T7 RNA polymerase, using a MessageAmp aRNA kit (Ambion). Amplified RNA was treated with DNase I (Roche) to remove cDNA templates, purified with an aRNA Purification Module (Ambion) and then used as template for single-stranded cDNA synthesis, according to Affymetrix instructions (<http://www.affymetrix.com/>) as follows: aRNA was reverse transcribed with SuperScript II (Invitrogen) for 1 h at 42°C with oligo(dT) as primer. After alkaline hydrolysis of aRNA and purification (MinElute columns, Qiagen), cDNA was fragmented with 1.5 units of DNase I (GE Healthcare) into fragments in the 50–200 bp range. Finally, 3' ends of fragmented cDNA were biotin-ddUTP labeled with terminal deoxynucleotidyl transferase (Promega, <http://www.promega.com/>) and GeneChip DNA labeling reagent (Affymetrix).

Three biological replicates and their corresponding negative controls were independently hybridized to ATH1 microarrays (Affymetrix), containing 22 500 transcript variants from 24 000 well-characterized Arabidopsis genes. Each sample was added to a hybridization solution containing 100 mM 2-(N-morpholino) ethanesulfonic acid, 1 M Na<sup>+</sup>, and 20 mM of EDTA in the presence of 0.01% Tween-20. Hybridization was performed for 16 h at 45°C. Each microarray was washed and stained with streptavidin–phycoerythrin in a Fluidics station 450 (Affymetrix) and scanned at 2.5-μm resolution in a GeneChip® Scanner 3000 7G system (Affymetrix). Data analyses were performed using genechip operating software (GCOS), to generate the corresponding CEL files.

Three biological replicates and their corresponding negative controls were independently hybridized to ATH1 microarrays (Affymetrix), containing 22 500 transcript variants from 24 000 well-characterized Arabidopsis genes. Each sample was added to a hybridization solution containing 100 mM 2-(N-morpholino) ethanesulfonic acid, 1 M Na<sup>+</sup>, and 20 mM of EDTA in the presence of 0.01% Tween-20. Hybridization was performed for 16 h at 45°C. Each microarray was washed and stained with streptavidin–phycoerythrin in a Fluidics station 450 (Affymetrix) and scanned at 2.5-μm resolution in a GeneChip® Scanner 3000 7G system (Affymetrix). Data analyses were performed using genechip operating software (GCOS), to generate the corresponding CEL files.

#### 5. Sample comparisons:

NO(15 min) vs Untreated plants, NO(30 min) vs Untreated plants and NO(60 min) vs Untreated plants.

#### 6. Statistical analysis:

Linear model methods (LiMMA) were used for determining differentially expressed genes. To control the false-discovery rate, P-values were corrected using the method of Benjamini and Hochberg (1995). Criteria for selection of genes were fold value >1.5 and false-discovery rate ≤ 0.05. Statistical analysis and graphical visualization of data were performed with the interactive tool fiesta (<http://bioinfogp.cnb.csic.es/tools/FIESTA/>).

**Supplemental Table S2.** Microarray analyses for identifying the early NO-responsive transcriptome (30 min after exposure to NO).

| Fold Change | logSignal (A) | logRatio (M) | logControl | FDR (limma) | ProbeID   | GENE_INFO                                                                                                              |
|-------------|---------------|--------------|------------|-------------|-----------|------------------------------------------------------------------------------------------------------------------------|
| 6.44        | 13.28         | 2.69         | 11.93      | 0.04642283  | AT5G66210 | CPK28__calcium-dependent protein kinase 28                                                                             |
| 6.22        | 11.83         | 2.64         | 10.51      | 0.04658549  | AT1G63940 | MDAR6__monodehydroascorbate reductase 6                                                                                |
| 5.3         | 12.82         | 2.4          | 11.62      | 0.0493034   | AT5G45340 | CYP707A3__cytochrome P450, family 707, subfamily A, polypeptide                                                        |
| 5.18        | 8.94          | 2.37         | 7.75       | 0.03000485  | AT5G64130 | 3CYP707A3__cytochrome P450, family 707, subfamily A, polypeptide 3<br>cAMP-regulated phosphoprotein 19-related protein |
| 5.01        | 12.99         | 2.33         | 11.83      | 0.04789237  | AT5G45340 | CYP707A3__cytochrome P450, family 707, subfamily A, polypeptide                                                        |
| 4.94        | 13.11         | 2.31         | 11.96      | 0.04642283  | AT5G10210 | 3CYP707A3__cytochrome P450, family 707, subfamily A, polypeptide 3                                                     |
| 4.89        | 13.56         | 2.29         | 12.42      | 0.04015667  | AT5G51190 | ERF105__Integrase-type DNA-binding superfamily protein                                                                 |
| 4.87        | 10.79         | 2.28         | 9.64       | 0.04658549  | AT5G28610 | ATMYB15_ATY19_MYB15__myb domain protein                                                                                |
| 4.2         | 12.01         | 2.07         | 10.97      | 0.03731617  | AT3G23250 | 15ATMYB15_ATY19_MYB15__myb domain protein 15                                                                           |
| 4.08        | 13.3          | 2.03         | 12.28      | 0.04658549  | AT5G47230 | ATERF-5_ATERF5_AtMACD1_ERF102_ERF5__ethylene responsive element binding factor 5                                       |
| 4.05        | 12            | 2.02         | 10.99      | 0.04642283  | AT3G23250 | ATMYB15_ATY19_MYB15__myb domain protein                                                                                |
| 3.46        | 13.8          | 1.79         | 12.9       | 0.03731617  | AT3G50930 | 15ATMYB15_ATY19_MYB15__myb domain protein 15                                                                           |
| 3.25        | 14.43         | 1.7          | 13.58      | 0.03731617  | AT4G29780 | BCS1__cytochrome BC1 synthesis                                                                                         |
| 3.2         | 12.55         | 1.68         | 11.71      | 0.04642283  | AT1G61340 | AtFBS1_FBS1__F-box family protein                                                                                      |
| 3.2         | 14.26         | 1.68         | 13.42      | 0.0493034   | AT4G17490 | ATERF6_ERF-6-6_ERF6__ethylene responsive element binding factor 6                                                      |
| 2.41        | 8.08          | 1.27         | 7.44       | 0.04658549  | AT4G25030 |                                                                                                                        |
| 2.38        | 14.49         | 1.25         | 13.86      | 0.04789237  | AT5G04340 | C2H2_CZF2_ZAT6__zinc finger of Arabidopsis thaliana 6                                                                  |
| 2.13        | 13.04         | 1.09         | 12.49      | 0.0493034   | AT4G27652 |                                                                                                                        |
| 2.12        | 9.84          | 1.08         | 9.3        | 0.04789237  | AT5G22530 |                                                                                                                        |
| 2.1         | 12.94         | 1.07         | 12.4       | 0.04642283  | AT2G39650 | Protein of unknown function (DUF506)                                                                                   |
| 2.06        | 13.18         | 1.05         | 12.65      | 0.04642283  | AT1G17147 | VQ motif-containing protein                                                                                            |
| 2.04        | 12.46         | 1.03         | 11.94      | 0.04789237  | AT5G47960 | ATRABA4C_RABA4C_SMG1__RAB GTPase homolog A4C                                                                           |
| 1.79        | 10.65         | 0.84         | 10.23      | 0.0493034   | AT5G26038 | MIR860A__MIR860a; miRNA                                                                                                |
| 1.75        | 8.76          | 0.8          | 8.36       | 0.0493034   | AT5G41080 | AtGDPD2_GDPD2__PLC-like phosphodiesterases superfamily protein                                                         |
| -2.04       | 10.77         | -1.03        | 11.28      | 0.04789237  | AT1G60190 | AtPUB19_PUB19__ARM repeat superfamily protein                                                                          |
| -2.04       | 11.86         | -1.03        | 12.37      | 0.04789237  | AT5G61350 | CAP1__Protein kinase superfamily protein                                                                               |
| -2.24       | 8.16          | -1.17        | 8.74       | 0.04789237  | AT3G57810 | Cysteine proteinases superfamily protein                                                                               |

|       |       |       |       |            |           |                                                  |
|-------|-------|-------|-------|------------|-----------|--------------------------------------------------|
| -3.06 | 7.82  | -1.61 | 8.63  | 0.03000485 | AT1G26140 |                                                  |
| -3.19 | 11.01 | -1.67 | 11.84 | 0.03731617 | AT1G58889 | transposable element gene                        |
| -3.85 | 11.71 | -1.95 | 12.69 | 0.04658549 | AT3G21660 | UBX domain-containing protein                    |
| -4.27 | 10.06 | -2.09 | 11.1  | 0.0493034  | AT1G09500 | NAD(P)-binding Rossmann-fold superfamily protein |

**Supplemental Table S2.** Microarray analyses for identifying the early NO-responsive transcriptome (60 min after exposure to NO).

| Fold Change | logSignal (A) | logRatio (M) | logControl | FDR (limma) | ProbeID   | GENE_INFO                                                                                                                                                                                                                                                                                                          |
|-------------|---------------|--------------|------------|-------------|-----------|--------------------------------------------------------------------------------------------------------------------------------------------------------------------------------------------------------------------------------------------------------------------------------------------------------------------|
| 25.72       | 11.25         | 4.68         | 8.91       | 0.00294186  | AT1G56240 | AtPP2-B13_PP2-B13__phloem protein 2-B13                                                                                                                                                                                                                                                                            |
| 17.32       | 11            | 4.11         | 8.94       | 0.00162136  | AT4G34410 | RRTF1__redox responsive transcription factor 1                                                                                                                                                                                                                                                                     |
| 17.29       | 11.17         | 4.11         | 9.12       | 0.00356968  | AT1G56250 | AtPP2-B14_PP2-B14__phloem protein 2-B14_F-box protein VBF                                                                                                                                                                                                                                                          |
| 12.12       | 12.31         | 3.6          | 10.51      | 0.00013825  | AT1G63940 | MDAR6__monodehydroascorbate reductase 6<br>BEST Arabidopsis thaliana protein match is: glycine-rich protein (TAIR:AT5G28630.1); Has 1536 Blast hits to 1202 proteins in 136 species: Archae - 0; Bacteria - 8; Metazoa - 888; Fungi - 120; Plants - 71; Viruses - 39; Other Eukaryotes - 410 (source: NCBI BLink). |
| 10.63       | 11.35         | 3.41         | 9.64       | 0.00195989  | AT5G28610 | 120; Plants - 71; Viruses - 39; Other Eukaryotes - 410 (source: NCBI BLink).                                                                                                                                                                                                                                       |
| 10.06       | 8.67          | 3.33         | 7          | 0.01344817  | AT3G43250 | Family of unknown function (DUF572)                                                                                                                                                                                                                                                                                |
| 9.72        | 12.98         | 3.28         | 11.34      | 0.00420969  | AT1G43800 | Plant stearyl-acyl-carrier-protein desaturase family protein                                                                                                                                                                                                                                                       |
| 9.67        | 12            | 3.27         | 10.36      | 0.00162136  | AT3G45960 | ATEXLA3_ATEXPL3_ATHEXP BETA 2.3_EXLA3_EXPL3__expansin-like A3                                                                                                                                                                                                                                                      |
| 9.3         | 11.41         | 3.22         | 9.8        | 0.0012111   | AT2G44840 | ATERF13_EREBP_ERF13__ethylene-responsive element binding factor 13                                                                                                                                                                                                                                                 |
| 9.29        | 12.14         | 3.22         | 10.53      | 0.00122807  | AT3G45960 | ATEXLA3_ATEXPL3_ATHEXP BETA 2.3_EXLA3_EXPL3__expansin-like A3                                                                                                                                                                                                                                                      |
| 9.09        | 11.64         | 3.18         | 10.05      | 0.00288203  | AT5G19110 | Eukaryotic aspartyl protease family protein                                                                                                                                                                                                                                                                        |
| 8.97        | 12.3          | 3.17         | 10.72      | 0.00309366  | AT4G27970 | SLAH2__SLAC1 homologue 2                                                                                                                                                                                                                                                                                           |
| 8.52        | 12.52         | 3.09         | 10.97      | 0.00221781  | AT3G23250 | ATMYB15_ATY19_MYB15__myb domain protein 15 ATMYB15_ATY19_MYB15__myb domain protein 15                                                                                                                                                                                                                              |
| 8.38        | 12.52         | 3.07         | 10.99      | 0.00229082  | AT3G23250 | ATMYB15_ATY19_MYB15__myb domain protein 15 ATMYB15_ATY19_MYB15__myb domain protein 15                                                                                                                                                                                                                              |
| 8.31        | 11.31         | 3.06         | 9.78       | 0.00470122  | AT1G64160 | Disease resistance-responsive (dirigent-like protein) family protein                                                                                                                                                                                                                                               |
| 8.19        | 11.61         | 3.03         | 10.09      | 0.00394474  | AT4G24110 | unknown protein; Has 76 Blast hits to 76 proteins in 13 species: Archae - 0; Bacteria - 0; Metazoa - 1; Fungi - 0; Plants - 75; Viruses - 0; Other Eukaryotes - 0 (source: NCBI BLink).                                                                                                                            |
| 8.01        | 8.68          | 3            | 7.18       | 0.00294186  | AT5G40000 | P-loop containing nucleoside triphosphate hydrolases superfamily protein                                                                                                                                                                                                                                           |
| 7.62        | 13.4          | 2.93         | 11.93      | 0.00219513  | AT5G66210 | CPK28__calcium-dependent protein kinase 28                                                                                                                                                                                                                                                                         |
| 7.6         | 12.46         | 2.93         | 11         | 0.00229082  | AT1G11185 |                                                                                                                                                                                                                                                                                                                    |

|      |       |      |       |            |           |                                                                                                                                                                                                                                                                                                                                                                                                                                               |
|------|-------|------|-------|------------|-----------|-----------------------------------------------------------------------------------------------------------------------------------------------------------------------------------------------------------------------------------------------------------------------------------------------------------------------------------------------------------------------------------------------------------------------------------------------|
| 7.14 | 10.06 | 2.84 | 8.64  | 0.003464   | AT5G28630 | glycine-rich protein                                                                                                                                                                                                                                                                                                                                                                                                                          |
| 7.04 | 10.22 | 2.82 | 8.81  | 0.00692117 | AT5G11140 | Arabidopsis phospholipase-like protein (PEARLI 4) family<br>JAS1_JAZ10_TIFY9__jasmonate-zim-domain protein 10 JAS1_JAZ10_TIFY9__jasmonate-zim-domain protein 10 JAS1_JAZ10_TIFY9__jasmonate-zim-domain protein 10                                                                                                                                                                                                                             |
| 6.78 | 9.27  | 2.76 | 7.89  | 0.01984953 | AT5G13220 | JAS1_JAZ10_TIFY9__jasmonate-zim-domain protein 10                                                                                                                                                                                                                                                                                                                                                                                             |
| 6.76 | 10.43 | 2.76 | 9.05  | 0.00782924 | AT1G71520 | Integrase-type DNA-binding superfamily protein                                                                                                                                                                                                                                                                                                                                                                                                |
| 6.59 | 12.86 | 2.72 | 11.5  | 0.00294186 | AT1G76650 | CML38__calmodulin-like 38 CML38__calmodulin-like 38                                                                                                                                                                                                                                                                                                                                                                                           |
| 6.57 | 11.63 | 2.72 | 10.27 | 0.01083634 | AT3G49620 | DIN11__2-oxoglutarate (2OG) and Fe(II)-dependent oxygenase superfamily protein                                                                                                                                                                                                                                                                                                                                                                |
| 6.49 | 12.06 | 2.7  | 10.72 | 0.003464   | AT2G16060 | AHB1_ARATH GLB1_ATGLB1_GLB1_HB1_NSHB1__hemoglobin 1                                                                                                                                                                                                                                                                                                                                                                                           |
| 6.48 | 9.69  | 2.7  | 8.35  | 0.00488717 | AT2G13706 |                                                                                                                                                                                                                                                                                                                                                                                                                                               |
| 6.42 | 11.94 | 2.68 | 10.6  | 0.00830701 | AT1G65390 | ATPP2-A5_PP2-A5__phloem protein 2 A5 ATPP2-A5_PP2-A5__phloem protein 2 A5                                                                                                                                                                                                                                                                                                                                                                     |
| 6.35 | 10.74 | 2.67 | 9.4   | 0.00996592 | AT3G23230 | Integrase-type DNA-binding superfamily protein                                                                                                                                                                                                                                                                                                                                                                                                |
| 6.33 | 9.73  | 2.66 | 8.4   | 0.00294186 | AT1G32910 | HXXXD-type acyl-transferase family protein                                                                                                                                                                                                                                                                                                                                                                                                    |
| 6.28 | 9.13  | 2.65 | 7.8   | 0.00322354 | AT2G06045 |                                                                                                                                                                                                                                                                                                                                                                                                                                               |
| 6.19 | 8.3   | 2.63 | 6.98  | 0.00179583 | AT1G66860 | Class I glutamine amidotransferase-like superfamily protein                                                                                                                                                                                                                                                                                                                                                                                   |
| 6.14 | 11.52 | 2.62 | 10.21 | 0.00356968 | AT2G44578 | RING/U-box superfamily protein<br>cAMP-regulated phosphoprotein 19-related protein cAMP-regulated phosphoprotein 19-related protein                                                                                                                                                                                                                                                                                                           |
| 6.12 | 9.06  | 2.61 | 7.75  | 0.00195989 | AT5G64130 | CYP707A3__cytochrome P450, family 707, subfamily A, polypeptide 3 CYP707A3__cytochrome P450, family 707, subfamily A, polypeptide 3                                                                                                                                                                                                                                                                                                           |
| 6.05 | 12.92 | 2.6  | 11.62 | 0.0021898  | AT5G45340 |                                                                                                                                                                                                                                                                                                                                                                                                                                               |
| 5.96 | 12.56 | 2.57 | 11.27 | 0.00309366 | AT3G29000 | Calcium-binding EF-hand family protein                                                                                                                                                                                                                                                                                                                                                                                                        |
| 5.92 | 9.41  | 2.56 | 8.12  | 0.02504352 | AT3G12910 | NAC (No Apical Meristem) domain transcriptional regulator superfamily protein<br>CONTAINS InterPro DOMAIN/s: C2 calcium-dependent membrane targeting (InterPro:IPR000008); BEST Arabidopsis thaliana protein match is: unknown protein (TAIR:AT5G65030.1); Has 1807 Blast hits to 1807 proteins in 277 species: Archae - 0; Bacteria - 0; Metazoa - 736; Fungi - 347; Plants - 385; Viruses - 0; Other Eukaryotes - 339 (source: NCBI BLink). |
| 5.87 | 13.24 | 2.55 | 11.96 | 0.0012111  | AT5G10210 |                                                                                                                                                                                                                                                                                                                                                                                                                                               |
| 5.86 | 11.66 | 2.55 | 10.38 | 0.00050433 | AT1G14480 | Ankyrin repeat family protein                                                                                                                                                                                                                                                                                                                                                                                                                 |
| 5.83 | 11.9  | 2.54 | 10.63 | 0.00784132 | AT1G65390 | ATPP2-A5_PP2-A5__phloem protein 2 A5 ATPP2-A5_PP2-A5__phloem protein 2 A5<br>Class I glutamine amidotransferase-like superfamily protein Class I glutamine amidotransferase-like superfamily protein                                                                                                                                                                                                                                          |
| 5.8  | 11.9  | 2.54 | 10.63 | 0.00294186 | AT1G15040 |                                                                                                                                                                                                                                                                                                                                                                                                                                               |
| 5.8  | 12.54 | 2.54 | 11.27 | 0.00356968 | AT1G76650 | CML38__calmodulin-like 38 CML38__calmodulin-like 38                                                                                                                                                                                                                                                                                                                                                                                           |
| 5.59 | 11.91 | 2.48 | 10.67 | 0.00574644 | AT4G15975 | RING/U-box superfamily protein<br>unknown protein; FUNCTIONS IN: molecular_function unknown; INVOLVED IN: biological_process unknown; LOCATED IN: mitochondrion; EXPRESSED IN: 18 plant structures; EXPRESSED DURING: 9 growth stages; Has 1 Blast hits to 1 proteins in 1 species:                                                                                                                                                           |
| 5.56 | 9.16  | 2.48 | 7.92  | 0.00326244 | AT3G10930 |                                                                                                                                                                                                                                                                                                                                                                                                                                               |

|      |       |      |       |            |           |                                                                                                                                                                                                                                                                                                                                                                                                                                                                                                                                |
|------|-------|------|-------|------------|-----------|--------------------------------------------------------------------------------------------------------------------------------------------------------------------------------------------------------------------------------------------------------------------------------------------------------------------------------------------------------------------------------------------------------------------------------------------------------------------------------------------------------------------------------|
|      |       |      |       |            |           | Archae - 0; Bacteria - 0; Metazoa - 0; Fungi - 0; Plants - 1; Viruses - 0; Other Eukaryotes - 0<br>(source: NCBI BLink).                                                                                                                                                                                                                                                                                                                                                                                                       |
| 5.45 | 11.62 | 2.45 | 10.39 | 0.0049944  | AT5G15120 | Plant Cysteine Oxidase 1 (PCO1)                                                                                                                                                                                                                                                                                                                                                                                                                                                                                                |
| 5.43 | 9.62  | 2.44 | 8.4   | 0.00410995 | AT3G14260 | Protein of unknown function (DUF567)                                                                                                                                                                                                                                                                                                                                                                                                                                                                                           |
| 5.35 | 10.86 | 2.42 | 9.65  | 0.00429467 | AT5G67080 | MAPKKK19__mitogen-activated protein kinase kinase kinase 19<br>CYP707A3__cytochrome P450, family 707, subfamily A, polypeptide 3 CYP707A3__cytochrome                                                                                                                                                                                                                                                                                                                                                                          |
| 5.31 | 13.03 | 2.41 | 11.83 | 0.00266801 | AT5G45340 | P450, family 707, subfamily A, polypeptide 3                                                                                                                                                                                                                                                                                                                                                                                                                                                                                   |
| 5.31 | 13.62 | 2.41 | 12.42 | 0.0026004  | AT5G51190 | Integrase-type DNA-binding superfamily protein                                                                                                                                                                                                                                                                                                                                                                                                                                                                                 |
| 5.18 | 11.93 | 2.37 | 10.74 | 0.00514581 | AT2G22880 | VQ motif-containing protein                                                                                                                                                                                                                                                                                                                                                                                                                                                                                                    |
| 5.1  | 8.74  | 2.35 | 7.57  | 0.01873743 | AT1G69930 | ATGSTU11__GSTU11__glutathione S-transferase TAU 11<br>unknown protein; FUNCTIONS IN: molecular_function unknown; INVOLVED IN: anaerobic<br>respiration; LOCATED IN: endomembrane system; EXPRESSED IN: 17 plant structures;<br>EXPRESSED DURING: 9 growth stages; BEST Arabidopsis thaliana protein match is: unknown<br>protein (TAIR:AT2G31945.1); Has 63 Blast hits to 63 proteins in 10 species: Archae - 0; Bacteria - 0;<br>Metazoa - 0; Fungi - 0; Plants - 63; Viruses - 0; Other Eukaryotes - 0 (source: NCBI BLink). |
| 4.96 | 12.69 | 2.31 | 11.54 | 0.00294186 | AT1G05575 | Integrase-type DNA-binding superfamily protein                                                                                                                                                                                                                                                                                                                                                                                                                                                                                 |
| 4.91 | 8.69  | 2.3  | 7.55  | 0.00461806 | AT1G22810 | DLAH__alpha/beta-Hydrolases superfamily protein                                                                                                                                                                                                                                                                                                                                                                                                                                                                                |
| 4.81 | 11.93 | 2.27 | 10.79 | 0.00250146 | AT1G30370 | JAS1_JAZ10_TIFY9__jasmonate-zim-domain protein 10 JAS1_JAZ10_TIFY9__jasmonate-zim-<br>domain protein 10 JAS1_JAZ10_TIFY9__jasmonate-zim-domain protein 10                                                                                                                                                                                                                                                                                                                                                                      |
| 4.8  | 13.06 | 2.26 | 11.93 | 0.00229082 | AT5G13220 | JAS1_JAZ10_TIFY9__jasmonate-zim-domain protein 10<br>unknown protein; BEST Arabidopsis thaliana protein match is: unknown protein<br>(TAIR:AT4G36500.1); Has 50 Blast hits to 50 proteins in 7 species: Archae - 0; Bacteria - 0;<br>Metazoa - 0; Fungi - 0; Plants - 50; Viruses - 0; Other Eukaryotes - 0 (source: NCBI BLink).                                                                                                                                                                                              |
| 4.79 | 12.09 | 2.26 | 10.96 | 0.00309366 | AT2G18210 | JAS1_JAZ10_TIFY9__jasmonate-zim-domain protein 10 JAS1_JAZ10_TIFY9__jasmonate-zim-<br>domain protein 10                                                                                                                                                                                                                                                                                                                                                                                                                        |
| 4.67 | 13.27 | 2.22 | 12.16 | 0.00254885 | AT5G13220 | JAS1_JAZ10_TIFY9__jasmonate-zim-domain protein 10<br>unknown protein; BEST Arabidopsis thaliana protein match is: unknown protein<br>(TAIR:AT5G22520.1); Has 30201 Blast hits to 17322 proteins in 780 species: Archae - 12;<br>Bacteria - 1396; Metazoa - 17338; Fungi - 3422; Plants - 5037; Viruses - 0; Other Eukaryotes -<br>2996 (source: NCBI BLink).                                                                                                                                                                   |
| 4.65 | 10.4  | 2.22 | 9.3   | 0.00542693 | AT5G22530 | Ankyrin repeat family protein Ankyrin repeat family protein Ankyrin repeat family protein                                                                                                                                                                                                                                                                                                                                                                                                                                      |
| 4.5  | 13.24 | 2.17 | 12.16 | 0.003464   | AT2G24600 | SAUR-like auxin-responsive protein family                                                                                                                                                                                                                                                                                                                                                                                                                                                                                      |
| 4.49 | 9.03  | 2.17 | 7.95  | 0.0052996  | AT1G43040 | VQ motif-containing protein                                                                                                                                                                                                                                                                                                                                                                                                                                                                                                    |
| 4.37 | 12.44 | 2.13 | 11.38 | 0.00583609 | AT1G21326 | S-adenosyl-L-methionine-dependent methyltransferases superfamily protein                                                                                                                                                                                                                                                                                                                                                                                                                                                       |
| 4.36 | 12.88 | 2.12 | 11.82 | 0.00603875 | AT3G54150 | B120__S-locus lectin protein kinase family protein                                                                                                                                                                                                                                                                                                                                                                                                                                                                             |
| 4.36 | 13.06 | 2.13 | 12    | 0.0031719  | AT4G21390 | unknown protein; FUNCTIONS IN: molecular_function unknown; INVOLVED IN:                                                                                                                                                                                                                                                                                                                                                                                                                                                        |
| 4.36 | 7.52  | 2.12 | 6.45  | 0.00323071 | AT4G27654 |                                                                                                                                                                                                                                                                                                                                                                                                                                                                                                                                |

|      |       |      |       |            |           |                                                                                                                                                                                                                                                                                                                                                                                                                                                                                                                       |
|------|-------|------|-------|------------|-----------|-----------------------------------------------------------------------------------------------------------------------------------------------------------------------------------------------------------------------------------------------------------------------------------------------------------------------------------------------------------------------------------------------------------------------------------------------------------------------------------------------------------------------|
|      |       |      |       |            |           | biological_process unknown; LOCATED IN: endomembrane system; EXPRESSED IN: 17 plant structures; EXPRESSED DURING: 9 growth stages; Has 30201 Blast hits to 17322 proteins in 780 species: Archae - 12; Bacteria - 1396; Metazoa - 17338; Fungi - 3422; Plants - 5037; Viruses - 0; Other Eukaryotes - 2996 (source: NCBI BLink).                                                                                                                                                                                      |
| 4.25 | 13.6  | 2.09 | 12.55 | 0.00294186 | AT2G24600 | Ankyrin repeat family protein Ankyrin repeat family protein Ankyrin repeat family protein                                                                                                                                                                                                                                                                                                                                                                                                                             |
| 4.24 | 13.32 | 2.08 | 12.28 | 0.0029534  | AT5G47230 | ATERF5_ATERF5_ERF5__ethylene responsive element binding factor 5                                                                                                                                                                                                                                                                                                                                                                                                                                                      |
| 4.23 | 12.4  | 2.08 | 11.36 | 0.00294186 | AT2G32030 | Acyl-CoA N-acyltransferases (NAT) superfamily protein                                                                                                                                                                                                                                                                                                                                                                                                                                                                 |
| 4.22 | 12.78 | 2.08 | 11.74 | 0.00309366 | AT1G17380 | JAZ5_TIFY11A__jasmonate-zim-domain protein 5                                                                                                                                                                                                                                                                                                                                                                                                                                                                          |
| 4.22 | 13.05 | 2.08 | 12.02 | 0.00310291 | AT3G25780 | AOC3__allene oxide cyclase 3                                                                                                                                                                                                                                                                                                                                                                                                                                                                                          |
| 4.11 | 13.92 | 2.04 | 12.9  | 0.00229082 | AT3G50930 | BCS1__cytochrome BC1 synthesis<br>unknown protein; FUNCTIONS IN: molecular_function unknown; INVOLVED IN: biological_process unknown; LOCATED IN: endomembrane system; EXPRESSED IN: root, flower; EXPRESSED DURING: petal differentiation and expansion stage; BEST Arabidopsis thaliana protein match is: unknown protein (TAIR:AT3G62990.1); Has 22 Blast hits to 22 proteins in 5 species: Archae - 0; Bacteria - 0; Metazoa - 0; Fungi - 0; Plants - 22; Viruses - 0; Other Eukaryotes - 0 (source: NCBI BLink). |
| 4.1  | 9.92  | 2.03 | 8.9   | 0.01056861 | AT2G47950 | Eukaryotes - 0 (source: NCBI BLink).                                                                                                                                                                                                                                                                                                                                                                                                                                                                                  |
| 3.99 | 12.71 | 2    | 11.71 | 0.00162136 | AT1G61340 | F-box family protein<br>unknown protein; FUNCTIONS IN: molecular_function unknown; INVOLVED IN: N-terminal protein myristoylation, anaerobic respiration; LOCATED IN: cellular_component unknown; EXPRESSED IN: leaf apex, inflorescence meristem, hypocotyl, root, flower; EXPRESSED DURING: petal differentiation and expansion stage; Has 47 Blast hits to 47 proteins in 13 species: Archae - 0; Bacteria - 0; Metazoa - 0; Fungi - 0; Plants - 47; Viruses - 0; Other Eukaryotes - 0 (source: NCBI BLink).       |
| 3.95 | 13.66 | 1.98 | 12.67 | 0.00417546 | AT1G19530 | (source: NCBI BLink).                                                                                                                                                                                                                                                                                                                                                                                                                                                                                                 |
| 3.95 | 13.45 | 1.98 | 12.46 | 0.0062763  | AT4G21680 | NRT1.8__NITRATE TRANSPORTER 1.8                                                                                                                                                                                                                                                                                                                                                                                                                                                                                       |
| 3.88 | 9.22  | 1.96 | 8.24  | 0.01033062 | AT1G19210 | Integrase-type DNA-binding superfamily protein                                                                                                                                                                                                                                                                                                                                                                                                                                                                        |
| 3.88 | 9.3   | 1.96 | 8.32  | 0.0059133  | AT2G37430 | C2H2 and C2HC zinc fingers superfamily protein                                                                                                                                                                                                                                                                                                                                                                                                                                                                        |
| 3.87 | 11.74 | 1.95 | 10.76 | 0.007271   | AT5G64750 | ABR1__Integrase-type DNA-binding superfamily protein                                                                                                                                                                                                                                                                                                                                                                                                                                                                  |
| 3.86 | 12.53 | 1.95 | 11.56 | 0.00610609 | AT4G13395 | DVL10_RTFL12__ROTUNDIFOLIA like 12                                                                                                                                                                                                                                                                                                                                                                                                                                                                                    |
| 3.86 | 12.75 | 1.95 | 11.77 | 0.00402989 | AT5G14700 | NAD(P)-binding Rossmann-fold superfamily protein                                                                                                                                                                                                                                                                                                                                                                                                                                                                      |
| 3.83 | 7.61  | 1.94 | 6.64  | 0.01039189 | AT5G21960 | Integrase-type DNA-binding superfamily protein<br>unknown protein; BEST Arabidopsis thaliana protein match is: unknown protein (TAIR:AT1G06475.1); Has 30201 Blast hits to 17322 proteins in 780 species: Archae - 12; Bacteria - 1396; Metazoa - 17338; Fungi - 3422; Plants - 5037; Viruses - 0; Other Eukaryotes - 2996 (source: NCBI BLink).                                                                                                                                                                      |
| 3.83 | 10.47 | 1.94 | 9.5   | 0.00539566 | AT5G46295 |                                                                                                                                                                                                                                                                                                                                                                                                                                                                                                                       |
| 3.75 | 13.8  | 1.91 | 12.85 | 0.00306866 | AT1G72520 | ATLOX4_LOX4__PLAT/LH2 domain-containing lipoxygenase family protein                                                                                                                                                                                                                                                                                                                                                                                                                                                   |
| 3.75 | 13.09 | 1.91 | 12.14 | 0.00195989 | AT3G59480 | pfkB-like carbohydrate kinase family protein                                                                                                                                                                                                                                                                                                                                                                                                                                                                          |

|      |       |      |       |            |           |                                                                                                                                                                                                                                                                                                                                                               |
|------|-------|------|-------|------------|-----------|---------------------------------------------------------------------------------------------------------------------------------------------------------------------------------------------------------------------------------------------------------------------------------------------------------------------------------------------------------------|
| 3.74 | 14.09 | 1.9  | 13.14 | 0.00309366 | AT1G14040 | EXS (ERD1/XPR1/SYG1) family protein                                                                                                                                                                                                                                                                                                                           |
| 3.74 | 10.29 | 1.9  | 9.34  | 0.01218332 | AT4G10270 | Wound-responsive family protein                                                                                                                                                                                                                                                                                                                               |
| 3.73 | 13.69 | 1.9  | 12.74 | 0.00294186 | AT1G28370 | ATERF11_ERF11__ERF domain protein 11                                                                                                                                                                                                                                                                                                                          |
| 3.71 | 10.99 | 1.89 | 10.05 | 0.00356968 | AT3G04220 | Disease resistance protein (TIR-NBS-LRR class) family                                                                                                                                                                                                                                                                                                         |
| 3.69 | 10.77 | 1.88 | 9.83  | 0.02313154 | AT1G77640 | Integrase-type DNA-binding superfamily protein                                                                                                                                                                                                                                                                                                                |
| 3.69 | 14.3  | 1.89 | 13.35 | 0.00102599 | AT4G31800 | ATWRKY18_WRKY18__WRKY DNA-binding protein 18<br>unknown protein; BEST Arabidopsis thaliana protein match is: unknown protein (TAIR:AT5G12010.1); Has 945 Blast hits to 944 proteins in 87 species: Archae - 0; Bacteria - 0; Metazoa - 519; Fungi - 43; Plants - 365; Viruses - 0; Other Eukaryotes - 18 (source: NCBI BLink).                                |
| 3.68 | 14.52 | 1.88 | 13.58 | 0.00102599 | AT4G29780 | Metazoa - 519; Fungi - 43; Plants - 365; Viruses - 0; Other Eukaryotes - 18 (source: NCBI BLink).                                                                                                                                                                                                                                                             |
| 3.67 | 11.37 | 1.88 | 10.44 | 0.00518233 | AT2G47890 | BBX11_B-box type zinc finger protein with CCT domain                                                                                                                                                                                                                                                                                                          |
| 3.58 | 11.71 | 1.84 | 10.79 | 0.01399612 | AT5G39890 | Plant Cysteine Oxidase 2 (PCO2)                                                                                                                                                                                                                                                                                                                               |
| 3.56 | 13.19 | 1.83 | 12.27 | 0.00196725 | AT5G54490 | PBP1__pinoid-binding protein 1                                                                                                                                                                                                                                                                                                                                |
| 3.51 | 11.37 | 1.81 | 10.46 | 0.0031892  | AT5G58680 | ARM repeat superfamily protein                                                                                                                                                                                                                                                                                                                                |
| 3.49 | 10.11 | 1.8  | 9.21  | 0.00326047 | AT5G64905 | PROPEP3__elicitor peptide 3 precursor                                                                                                                                                                                                                                                                                                                         |
| 3.45 | 14.08 | 1.79 | 13.19 | 0.0172413  | AT5G39580 | Peroxidase superfamily protein Peroxidase superfamily protein                                                                                                                                                                                                                                                                                                 |
| 3.44 | 14.31 | 1.78 | 13.42 | 0.00221781 | AT4G17490 | ATERF6_ERF-6-6_ERF6__ethylene responsive element binding factor 6                                                                                                                                                                                                                                                                                             |
| 3.43 | 11.37 | 1.78 | 10.48 | 0.00251625 | AT3G55840 | Hs1pro-1 protein                                                                                                                                                                                                                                                                                                                                              |
| 3.42 | 6.95  | 1.77 | 6.06  | 0.01354972 | AT1G12805 | nucleotide binding<br>unknown protein; Has 35333 Blast hits to 34131 proteins in 2444 species: Archae - 798; Bacteria - 22429; Metazoa - 974; Fungi - 991; Plants - 531; Viruses - 0; Other Eukaryotes - 9610 (source: NCBI BLink).                                                                                                                           |
| 3.41 | 12.62 | 1.77 | 11.73 | 0.00372592 | AT4G28085 | NCBI BLink).<br>unknown protein; LOCATED IN: cellular_component unknown; BEST Arabidopsis thaliana protein match is: unknown protein (TAIR:AT5G23490.1); Has 30201 Blast hits to 17322 proteins in 780 species: Archae - 12; Bacteria - 1396; Metazoa - 17338; Fungi - 3422; Plants - 5037; Viruses - 0; Other Eukaryotes - 2996 (source: NCBI BLink).        |
| 3.39 | 11.72 | 1.76 | 10.84 | 0.01256559 | AT5G23510 | Viruses - 0; Other Eukaryotes - 2996 (source: NCBI BLink).                                                                                                                                                                                                                                                                                                    |
| 3.38 | 13.96 | 1.76 | 13.08 | 0.0182418  | AT5G39580 | Peroxidase superfamily protein Peroxidase superfamily protein                                                                                                                                                                                                                                                                                                 |
| 3.37 | 7.96  | 1.75 | 7.08  | 0.01103668 | AT4G10265 | Wound-responsive family protein                                                                                                                                                                                                                                                                                                                               |
| 3.36 | 11.19 | 1.75 | 10.32 | 0.00402989 | AT3G60550 | CYCP3;2__cyclin p3;2                                                                                                                                                                                                                                                                                                                                          |
| 3.36 | 9.59  | 1.75 | 8.72  | 0.01476349 | AT4G11470 | CRK31__cysteine-rich RLK (RECEPTOR-like protein kinase) 31<br>unknown protein; LOCATED IN: chloroplast; BEST Arabidopsis thaliana protein match is: unknown protein (TAIR:AT3G23170.1); Has 74 Blast hits to 74 proteins in 6 species: Archae - 0; Bacteria - 0; Metazoa - 0; Fungi - 0; Plants - 74; Viruses - 0; Other Eukaryotes - 0 (source: NCBI BLink). |
| 3.36 | 10.68 | 1.75 | 9.81  | 0.00929952 | AT4G14450 | BLINK).                                                                                                                                                                                                                                                                                                                                                       |
| 3.34 | 14.05 | 1.74 | 13.18 | 0.00294186 | AT1G69890 | Protein of unknown function (DUF569)<br>unknown protein; FUNCTIONS IN: molecular_function unknown; INVOLVED IN: N-terminal protein myristoylation; LOCATED IN: cellular_component unknown; BEST Arabidopsis thaliana                                                                                                                                          |
| 3.32 | 10.37 | 1.73 | 9.5   | 0.00710216 | AT4G21920 |                                                                                                                                                                                                                                                                                                                                                               |



|      |       |      |       |            |           |                                                                                                                                                                                                                                                                        |
|------|-------|------|-------|------------|-----------|------------------------------------------------------------------------------------------------------------------------------------------------------------------------------------------------------------------------------------------------------------------------|
|      |       |      |       |            |           | protein match is: unknown protein (TAIR:AT3G20340.1); Has 40 Blast hits to 40 proteins in 10 species: Archae - 0; Bacteria - 0; Metazoa - 0; Fungi - 0; Plants - 40; Viruses - 0; Other Eukaryotes - 0 (source: NCBI BLink).                                           |
| 3.28 | 13.68 | 1.71 | 12.82 | 0.00394474 | AT3G02550 | LBD41__LOB domain-containing protein 41                                                                                                                                                                                                                                |
| 3.28 | 10.48 | 1.72 | 9.62  | 0.00953954 | AT3G23240 | ATERF1_ERF1__ethylene response factor 1                                                                                                                                                                                                                                |
| 3.28 | 11.49 | 1.71 | 10.63 | 0.00429467 | AT5G42380 | CML37_CML39__calmodulin like 37                                                                                                                                                                                                                                        |
| 3.26 | 10.35 | 1.7  | 9.5   | 0.00836735 | AT3G28580 | P-loop containing nucleoside triphosphate hydrolases superfamily protein                                                                                                                                                                                               |
| 3.25 | 13.19 | 1.7  | 12.34 | 0.00195989 | AT1G28480 | GRX480_roxy19__Thioredoxin superfamily protein                                                                                                                                                                                                                         |
| 3.25 | 8.91  | 1.7  | 8.06  | 0.01508049 | AT5G17430 | BBM__Integrase-type DNA-binding superfamily protein                                                                                                                                                                                                                    |
|      |       |      |       |            |           | AGC2__AGC2-1_AtOXI1_OXI1__AGC (cAMP-dependent, cGMP-dependent and protein kinase C) kinase family protein                                                                                                                                                              |
| 3.24 | 12.1  | 1.69 | 11.25 | 0.00309366 | AT3G25250 | CYP94C1__cytochrome P450, family 94, subfamily C, polypeptide 1                                                                                                                                                                                                        |
| 3.22 | 11.4  | 1.69 | 10.56 | 0.01357873 | AT2G27690 | HHO1, HRS1 Homologue 1_myb-like transcription factor family protein                                                                                                                                                                                                    |
| 3.21 | 12.13 | 1.68 | 11.29 | 0.00495528 | AT3G25790 | Concanavalin A-like lectin protein kinase family protein                                                                                                                                                                                                               |
| 3.2  | 7.66  | 1.68 | 6.81  | 0.00420934 | AT1G70130 | ARM repeat superfamily protein                                                                                                                                                                                                                                         |
| 3.18 | 9.63  | 1.67 | 8.8   | 0.01676505 | AT3G02840 | Plant mobile domain protein family                                                                                                                                                                                                                                     |
| 3.15 | 10.01 | 1.66 | 9.18  | 0.00229082 | AT1G50750 | Ankyrin repeat family protein Ankyrin repeat family protein Ankyrin repeat family protein                                                                                                                                                                              |
| 3.15 | 12.75 | 1.66 | 11.92 | 0.00420866 | AT2G24600 | PGM__phosphoglycerate/bisphosphoglycerate mutase                                                                                                                                                                                                                       |
| 3.14 | 13.6  | 1.65 | 12.78 | 0.00309366 | AT1G78050 | Calcium-binding EF-hand family protein                                                                                                                                                                                                                                 |
| 3.13 | 7.86  | 1.65 | 7.04  | 0.0165446  | AT1G76640 | Glycosyl hydrolase superfamily protein                                                                                                                                                                                                                                 |
| 3.13 | 13.26 | 1.64 | 12.44 | 0.00306866 | AT4G18340 | Nucleotide-diphospho-sugar transferases superfamily protein Nucleotide-diphospho-sugar transferases superfamily protein                                                                                                                                                |
| 3.08 | 12.79 | 1.62 | 11.98 | 0.0029534  | AT2G35710 | ATWRKY40_WRKY40__WRKY DNA-binding protein 40                                                                                                                                                                                                                           |
| 3.07 | 14.34 | 1.62 | 13.53 | 0.00309366 | AT1G80840 | sequence-specific DNA binding transcription factors                                                                                                                                                                                                                    |
| 3.03 | 11.85 | 1.6  | 11.05 | 0.00309366 | AT3G10040 | BOA__Homeodomain-like superfamily protein                                                                                                                                                                                                                              |
| 3.03 | 9.6   | 1.6  | 8.8   | 0.0151051  | AT5G59570 | NAGS2__N-acetyl-l-glutamate synthase 2                                                                                                                                                                                                                                 |
| 3.02 | 10.7  | 1.59 | 9.9   | 0.01708562 | AT4G37670 | AtPEPR2_PEPR2__PEP1 receptor 2                                                                                                                                                                                                                                         |
| 2.99 | 13.87 | 1.58 | 13.08 | 0.00356968 | AT1G17750 | unknown protein; BEST Arabidopsis thaliana protein match is: unknown protein (TAIR:AT5G22530.1); Has 14 Blast hits to 14 proteins in 2 species: Archae - 0; Bacteria - 0; Metazoa - 0; Fungi - 0; Plants - 14; Viruses - 0; Other Eukaryotes - 0 (source: NCBI BLink). |
| 2.96 | 10.8  | 1.56 | 10.02 | 0.01506067 | AT5G22520 | AtCAF1a_CAF1a__Polynucleotidyl transferase, ribonuclease H-like superfamily protein                                                                                                                                                                                    |
| 2.94 | 13.72 | 1.56 | 12.94 | 0.00382427 | AT3G44260 | PUB24__plant U-box 24                                                                                                                                                                                                                                                  |
| 2.92 | 12.68 | 1.54 | 11.91 | 0.00356968 | AT3G11840 | LHT7__LYS/HIS transporter 7                                                                                                                                                                                                                                            |
| 2.92 | 11.48 | 1.55 | 10.71 | 0.0385492  | AT4G35180 | Plant invertase/pectin methylesterase inhibitor superfamily protein                                                                                                                                                                                                    |
| 2.91 | 13.2  | 1.54 | 12.43 | 0.00950083 | AT5G62340 | ACS7_ATACS7__1-amino-cyclopropane-1-carboxylate synthase 7                                                                                                                                                                                                             |
| 2.9  | 11.55 | 1.54 | 10.78 | 0.01874475 | AT4G26200 | ATL31_CNI1__carbon/nitrogen insensitive 1                                                                                                                                                                                                                              |
| 2.9  | 11.17 | 1.53 | 10.41 | 0.00394838 | AT5G27420 |                                                                                                                                                                                                                                                                        |

|      |       |      |       |            |           |                                                                                                                                                                                                                                                                         |
|------|-------|------|-------|------------|-----------|-------------------------------------------------------------------------------------------------------------------------------------------------------------------------------------------------------------------------------------------------------------------------|
| 2.87 | 10.14 | 1.52 | 9.38  | 0.00294186 | AT3G06435 | Expressed protein                                                                                                                                                                                                                                                       |
| 2.87 | 8.73  | 1.52 | 7.97  | 0.0134152  | AT5G19097 | unknown protein; Has 30201 Blast hits to 17322 proteins in 780 species: Archae - 12; Bacteria - 1396; Metazoa - 17338; Fungi - 3422; Plants - 5037; Viruses - 0; Other Eukaryotes - 2996 (source: NCBI BLINK).                                                          |
| 2.85 | 11.36 | 1.51 | 10.61 | 0.00904592 | AT5G65300 | NCBI BLINK).                                                                                                                                                                                                                                                            |
| 2.83 | 12.49 | 1.5  | 11.74 | 0.00486057 | AT1G80820 | ATCCR2_CCR2__cinnamoyl coa reductase                                                                                                                                                                                                                                    |
| 2.83 | 14.62 | 1.5  | 13.86 | 0.00290947 | AT5G04340 | C2H2_CZF2_ZAT6__zinc finger of Arabidopsis thaliana 6                                                                                                                                                                                                                   |
| 2.82 | 9.79  | 1.5  | 9.04  | 0.00927726 | AT1G72416 | Chaperone DnaJ-domain superfamily protein Chaperone DnaJ-domain superfamily protein                                                                                                                                                                                     |
| 2.81 | 13.27 | 1.49 | 12.52 | 0.01044382 | AT1G19380 | Chaperone DnaJ-domain superfamily protein Chaperone DnaJ-domain superfamily protein                                                                                                                                                                                     |
| 2.81 | 10.64 | 1.49 | 9.9   | 0.00269259 | AT5G58720 | Protein of unknown function (DUF1195)                                                                                                                                                                                                                                   |
| 2.81 | 11.68 | 1.49 | 10.94 | 0.00201069 | AT5G66070 | smr (Small MutS Related) domain-containing protein                                                                                                                                                                                                                      |
| 2.78 | 14.34 | 1.48 | 13.61 | 0.00306866 | AT1G18570 | RING/U-box superfamily protein                                                                                                                                                                                                                                          |
| 2.78 | 12.05 | 1.48 | 11.31 | 0.00264502 | AT2G01300 | AtMYB51_BW51A_BW51B_HIG1_MYB51__myb domain protein 51                                                                                                                                                                                                                   |
| 2.78 | 13.41 | 1.47 | 12.68 | 0.00309366 | AT5G66650 | unknown protein; BEST Arabidopsis thaliana protein match is: unknown protein (TAIR:AT1G15010.1); Has 73 Blast hits to 73 proteins in 12 species: Archae - 0; Bacteria - 0; Metazoa - 0; Fungi - 0; Plants - 73; Viruses - 0; Other Eukaryotes - 0 (source: NCBI BLINK). |
| 2.77 | 12.62 | 1.47 | 11.88 | 0.0332894  | AT3G26200 | Protein of unknown function (DUF607)                                                                                                                                                                                                                                    |
| 2.75 | 12.84 | 1.46 | 12.11 | 0.00250146 | AT3G43430 | CYP71B22__cytochrome P450, family 71, subfamily B, polypeptide 22                                                                                                                                                                                                       |
| 2.74 | 14.52 | 1.45 | 13.79 | 0.00326511 | AT1G27730 | RING/U-box superfamily protein                                                                                                                                                                                                                                          |
| 2.74 | 14.57 | 1.45 | 13.84 | 0.00358217 | AT4G25810 | STZ_ZAT10__salt tolerance zinc finger                                                                                                                                                                                                                                   |
| 2.73 | 10.38 | 1.45 | 9.66  | 0.00449194 | AT3G06490 | XTH23_XTR6__xyloglucan endotransglycosylase 6                                                                                                                                                                                                                           |
| 2.72 | 11.03 | 1.45 | 10.31 | 0.00825991 | AT1G56680 | AtMYB108_BOS1_MYB108__myb domain protein 108                                                                                                                                                                                                                            |
| 2.72 | 9.45  | 1.44 | 8.73  | 0.00294186 | AT1G58420 | Chitinase family protein                                                                                                                                                                                                                                                |
| 2.71 | 12.35 | 1.44 | 11.63 | 0.00392318 | AT4G28703 | Uncharacterised conserved protein UCP031279                                                                                                                                                                                                                             |
| 2.69 | 12.25 | 1.43 | 11.53 | 0.00451369 | AT2G35710 | RmlC-like cupins superfamily protein                                                                                                                                                                                                                                    |
| 2.68 | 11.14 | 1.42 | 10.42 | 0.00420969 | AT1G79310 | Nucleotide-diphospho-sugar transferases superfamily protein Nucleotide-diphospho-sugar transferases superfamily protein                                                                                                                                                 |
| 2.68 | 13.1  | 1.42 | 12.39 | 0.00610609 | AT4G20780 | AtMC7_AtMCP2a_MC7_MCP2a__metacaspase 7                                                                                                                                                                                                                                  |
| 2.68 | 13.86 | 1.42 | 13.15 | 0.00479295 | AT5G41080 | CML42__calmodulin like 42                                                                                                                                                                                                                                               |
| 2.67 | 10.33 | 1.42 | 9.62  | 0.01622576 | AT2G12646 | AtGDPD2_GDPD2__PLC-like phosphodiesterases superfamily protein                                                                                                                                                                                                          |
| 2.67 | 10.51 | 1.42 | 9.8   | 0.0079029  | AT2G27080 | AtGDPD2_GDPD2__PLC-like phosphodiesterases superfamily protein                                                                                                                                                                                                          |
| 2.67 | 10.98 | 1.41 | 10.27 | 0.00426996 | AT5G64130 | PLATZ transcription factor family protein                                                                                                                                                                                                                               |
| 2.66 | 11.9  | 1.41 | 11.19 | 0.00426578 | AT5G01100 | Late embryogenesis abundant (LEA) hydroxyproline-rich glycoprotein family cAMP-regulated phosphoprotein 19-related protein cAMP-regulated phosphoprotein 19-related protein                                                                                             |
|      |       |      |       |            |           | O-fucosyltransferase family protein                                                                                                                                                                                                                                     |

|      |       |      |       |            |           |                                                                                                                                                                                                                                                                                                                                                                                                                                     |
|------|-------|------|-------|------------|-----------|-------------------------------------------------------------------------------------------------------------------------------------------------------------------------------------------------------------------------------------------------------------------------------------------------------------------------------------------------------------------------------------------------------------------------------------|
| 2.66 | 13.43 | 1.41 | 12.73 | 0.00309366 | AT5G07440 | GDH2__glutamate dehydrogenase 2                                                                                                                                                                                                                                                                                                                                                                                                     |
| 2.66 | 12.91 | 1.41 | 12.2  | 0.01481975 | AT5G10130 | Pollen Ole e 1 allergen and extensin family protein<br>unknown protein; Has 6 Blast hits to 6 proteins in 2 species: Archae - 0; Bacteria - 0; Metazoa - 0; Fungi - 0; Plants - 6; Viruses - 0; Other Eukaryotes - 0 (source: NCBI BLink). unknown protein; Has 6 Blast hits to 6 proteins in 2 species: Archae - 0; Bacteria - 0; Metazoa - 0; Fungi - 0; Plants - 6; Viruses - 0; Other Eukaryotes - 0 (source: NCBI BLink).      |
| 2.65 | 13.5  | 1.41 | 12.79 | 0.01264106 | AT1G10990 |                                                                                                                                                                                                                                                                                                                                                                                                                                     |
| 2.65 | 9.13  | 1.41 | 8.43  | 0.00622149 | AT1G15330 | Cystathionine beta-synthase (CBS) protein<br>unknown protein; BEST Arabidopsis thaliana protein match is: unknown protein (TAIR:AT4G27657.1); Has 30201 Blast hits to 17322 proteins in 780 species: Archae - 12; Bacteria - 1396; Metazoa - 17338; Fungi - 3422; Plants - 5037; Viruses - 0; Other Eukaryotes - 2996 (source: NCBI BLink).                                                                                         |
| 2.65 | 13.19 | 1.41 | 12.49 | 0.00229082 | AT4G27652 | Class I glutamine amidotransferase-like superfamily protein Class I glutamine amidotransferase-like superfamily protein                                                                                                                                                                                                                                                                                                             |
| 2.64 | 14.2  | 1.4  | 13.5  | 0.00481576 | AT1G15040 |                                                                                                                                                                                                                                                                                                                                                                                                                                     |
| 2.64 | 14.16 | 1.4  | 13.46 | 0.00565467 | AT5G57220 | CYP81F2__cytochrome P450, family 81, subfamily F, polypeptide 2<br>Chaperone DnaJ-domain superfamily protein Chaperone DnaJ-domain superfamily protein                                                                                                                                                                                                                                                                              |
| 2.63 | 13.64 | 1.39 | 12.94 | 0.00740087 | AT1G72416 | Chaperone DnaJ-domain superfamily protein Chaperone DnaJ-domain superfamily protein                                                                                                                                                                                                                                                                                                                                                 |
| 2.63 | 11.76 | 1.4  | 11.06 | 0.01051861 | AT5G65600 | Concanavalin A-like lectin protein kinase family protein<br>unknown protein; Has 6 Blast hits to 6 proteins in 2 species: Archae - 0; Bacteria - 0; Metazoa - 0; Fungi - 0; Plants - 6; Viruses - 0; Other Eukaryotes - 0 (source: NCBI BLink). unknown protein; Has 6 Blast hits to 6 proteins in 2 species: Archae - 0; Bacteria - 0; Metazoa - 0; Fungi - 0; Plants - 6; Viruses - 0; Other Eukaryotes - 0 (source: NCBI BLink). |
| 2.62 | 12.67 | 1.39 | 11.97 | 0.01661574 | AT1G10990 |                                                                                                                                                                                                                                                                                                                                                                                                                                     |
| 2.62 | 11.88 | 1.39 | 11.19 | 0.00338136 | AT4G23810 | ATWRKY53__WRKY53__WRKY family transcription factor                                                                                                                                                                                                                                                                                                                                                                                  |
| 2.62 | 12.29 | 1.39 | 11.6  | 0.0040103  | AT5G48110 | Terpenoid cyclases/Protein prenyltransferases superfamily protein<br>unknown protein; Has 31 Blast hits to 31 proteins in 9 species: Archae - 0; Bacteria - 0; Metazoa - 0; Fungi - 0; Plants - 31; Viruses - 0; Other Eukaryotes - 0 (source: NCBI BLink).                                                                                                                                                                         |
| 2.61 | 13.37 | 1.38 | 12.68 | 0.00422741 | AT2G25735 |                                                                                                                                                                                                                                                                                                                                                                                                                                     |
| 2.6  | 12.1  | 1.38 | 11.41 | 0.01241051 | AT4G08345 |                                                                                                                                                                                                                                                                                                                                                                                                                                     |
| 2.59 | 12.05 | 1.38 | 11.37 | 0.00676276 | AT1G21320 | nucleotide binding;nucleic acid binding                                                                                                                                                                                                                                                                                                                                                                                             |
| 2.59 | 8.15  | 1.38 | 7.47  | 0.01812225 | AT2G14290 | F-box family protein with a domain of unknown function (DUF295)                                                                                                                                                                                                                                                                                                                                                                     |
| 2.59 | 12.47 | 1.38 | 11.78 | 0.00459015 | AT2G41800 | Protein of unknown function, DUF642<br>unknown protein; Has 65 Blast hits to 65 proteins in 11 species: Archae - 0; Bacteria - 0; Metazoa - 0; Fungi - 0; Plants - 65; Viruses - 0; Other Eukaryotes - 0 (source: NCBI BLink).                                                                                                                                                                                                      |
| 2.58 | 14.36 | 1.37 | 13.67 | 0.00286412 | AT3G57450 | unknown protein; FUNCTIONS IN: molecular_function unknown; INVOLVED IN: biological_process unknown; LOCATED IN: endomembrane system; BEST Arabidopsis thaliana protein match is: unknown protein (TAIR:AT4G12930.1); Has 12 Blast hits to 12 proteins in 2 species: Archae - 0; Bacteria - 0; Metazoa - 0; Fungi - 0; Plants - 12; Viruses - 0; Other Eukaryotes - 0 (source: NCBI BLink).                                          |
| 2.58 | 10.53 | 1.36 | 9.85  | 0.00426996 | AT4G28930 |                                                                                                                                                                                                                                                                                                                                                                                                                                     |

|      |       |      |       |            |           |                                                                                                                                                                                                                                                                                                                                                                                                                                                                                                                                                                                                                                                                                                   |
|------|-------|------|-------|------------|-----------|---------------------------------------------------------------------------------------------------------------------------------------------------------------------------------------------------------------------------------------------------------------------------------------------------------------------------------------------------------------------------------------------------------------------------------------------------------------------------------------------------------------------------------------------------------------------------------------------------------------------------------------------------------------------------------------------------|
| 2.58 | 9.04  | 1.37 | 8.36  | 0.00306866 | AT5G41080 | AtGDPD2_GDPD2__PLC-like phosphodiesterases superfamily protein<br>AtGDPD2_GDPD2__PLC-like phosphodiesterases superfamily protein<br>unknown protein; FUNCTIONS IN: molecular_function unknown; INVOLVED IN:<br>biological_process unknown; LOCATED IN: chloroplast; EXPRESSED IN: 14 plant structures;<br>EXPRESSED DURING: 9 growth stages; CONTAINS InterPro DOMAIN/s: Protein of unknown<br>function DUF740 (InterPro:IPR008004); BEST Arabidopsis thaliana protein match is: unknown<br>protein (TAIR:AT1G22470.1); Has 83 Blast hits to 83 proteins in 12 species: Archae - 0; Bacteria<br>- 0; Metazoa - 0; Fungi - 0; Plants - 81; Viruses - 0; Other Eukaryotes - 2 (source: NCBI BLink). |
| 2.57 | 9.86  | 1.36 | 9.18  | 0.00638451 | AT1G35210 |                                                                                                                                                                                                                                                                                                                                                                                                                                                                                                                                                                                                                                                                                                   |
| 2.57 | 11.9  | 1.36 | 11.22 | 0.00356968 | AT4G39580 | Galactose oxidase/kelch repeat superfamily protein                                                                                                                                                                                                                                                                                                                                                                                                                                                                                                                                                                                                                                                |
| 2.56 | 9.09  | 1.36 | 8.41  | 0.01899215 | AT1G66600 | ABO3_ATWRKY63_WRKY63__ABA overly sensitive mutant 3                                                                                                                                                                                                                                                                                                                                                                                                                                                                                                                                                                                                                                               |
| 2.56 | 10.62 | 1.36 | 9.95  | 0.00426996 | AT2G13650 | GONST1__golgi nucleotide sugar transporter 1                                                                                                                                                                                                                                                                                                                                                                                                                                                                                                                                                                                                                                                      |
| 2.56 | 6.73  | 1.36 | 6.05  | 0.01590268 | AT2G17850 | Rhodanese/Cell cycle control phosphatase superfamily protein                                                                                                                                                                                                                                                                                                                                                                                                                                                                                                                                                                                                                                      |
| 2.56 | 13.47 | 1.35 | 12.79 | 0.01357873 | AT2G23170 | GH3.3__Auxin-responsive GH3 family protein                                                                                                                                                                                                                                                                                                                                                                                                                                                                                                                                                                                                                                                        |
| 2.56 | 9.09  | 1.36 | 8.41  | 0.01600194 | AT2G44581 | RING/U-box superfamily protein                                                                                                                                                                                                                                                                                                                                                                                                                                                                                                                                                                                                                                                                    |
| 2.56 | 11.48 | 1.36 | 10.8  | 0.00382427 | AT5G19100 | Eukaryotic aspartyl protease family protein                                                                                                                                                                                                                                                                                                                                                                                                                                                                                                                                                                                                                                                       |
| 2.55 | 12.49 | 1.35 | 11.82 | 0.01241845 | AT5G49850 | Mannose-binding lectin superfamily protein                                                                                                                                                                                                                                                                                                                                                                                                                                                                                                                                                                                                                                                        |
| 2.55 | 12.14 | 1.35 | 11.46 | 0.00784613 | ATCG01030 |                                                                                                                                                                                                                                                                                                                                                                                                                                                                                                                                                                                                                                                                                                   |
| 2.54 | 13.33 | 1.35 | 12.65 | 0.00426996 | AT1G17147 | VQ motif-containing protein                                                                                                                                                                                                                                                                                                                                                                                                                                                                                                                                                                                                                                                                       |
| 2.54 | 12.73 | 1.35 | 12.06 | 0.00507483 | AT1G17420 | ATLOX3_LOX3__lipoxygenase 3                                                                                                                                                                                                                                                                                                                                                                                                                                                                                                                                                                                                                                                                       |
| 2.54 | 11.85 | 1.35 | 11.18 | 0.01150797 | AT2G22860 | ATPSK2_PSK2__phytosulfokine 2 precursor                                                                                                                                                                                                                                                                                                                                                                                                                                                                                                                                                                                                                                                           |
| 2.54 | 12.37 | 1.35 | 11.7  | 0.00309366 | AT2G32020 | Acyl-CoA N-acyltransferases (NAT) superfamily protein                                                                                                                                                                                                                                                                                                                                                                                                                                                                                                                                                                                                                                             |
| 2.54 | 13.78 | 1.34 | 13.11 | 0.02046243 | AT3G23550 | MATE efflux family protein                                                                                                                                                                                                                                                                                                                                                                                                                                                                                                                                                                                                                                                                        |
| 2.54 | 12.7  | 1.35 | 12.03 | 0.00845049 | AT3G48450 | RPM1-interacting protein 4 (RIN4) family protein                                                                                                                                                                                                                                                                                                                                                                                                                                                                                                                                                                                                                                                  |
| 2.54 | 11.81 | 1.35 | 11.14 | 0.00309366 | AT5G32511 |                                                                                                                                                                                                                                                                                                                                                                                                                                                                                                                                                                                                                                                                                                   |
| 2.53 | 11.92 | 1.34 | 11.25 | 0.00315341 | AT1G61820 | BGLU46__beta glucosidase 46 BGLU46__beta glucosidase 46<br>unknown protein; FUNCTIONS IN: molecular_function unknown; INVOLVED IN:<br>biological_process unknown; LOCATED IN: chloroplast; EXPRESSED IN: root, pedicel;<br>EXPRESSED DURING: 4 anthesis; Has 30201 Blast hits to 17322 proteins in 780 species:<br>Archae - 12; Bacteria - 1396; Metazoa - 17338; Fungi - 3422; Plants - 5037; Viruses - 0; Other<br>Eukaryotes - 2996 (source: NCBI BLink).                                                                                                                                                                                                                                      |
| 2.53 | 10.62 | 1.34 | 9.95  | 0.019243   | AT4G19980 |                                                                                                                                                                                                                                                                                                                                                                                                                                                                                                                                                                                                                                                                                                   |
| 2.53 | 12.93 | 1.34 | 12.26 | 0.01231488 | AT4G33070 | Thiamine pyrophosphate dependent pyruvate decarboxylase family protein                                                                                                                                                                                                                                                                                                                                                                                                                                                                                                                                                                                                                            |
| 2.53 | 13.68 | 1.34 | 13.01 | 0.00410995 | AT5G25930 | Protein kinase family protein with leucine-rich repeat domain                                                                                                                                                                                                                                                                                                                                                                                                                                                                                                                                                                                                                                     |
| 2.53 | 12.16 | 1.34 | 11.49 | 0.00873067 | AT5G38200 | Class I glutamine amidotransferase-like superfamily protein<br>unknown protein; Has 27 Blast hits to 27 proteins in 9 species: Archae - 0; Bacteria - 0; Metazoa -<br>0; Fungi - 0; Plants - 27; Viruses - 0; Other Eukaryotes - 0 (source: NCBI BLink).                                                                                                                                                                                                                                                                                                                                                                                                                                          |
| 2.53 | 9.83  | 1.34 | 9.16  | 0.01871038 | AT5G57510 |                                                                                                                                                                                                                                                                                                                                                                                                                                                                                                                                                                                                                                                                                                   |
| 2.52 | 12.94 | 1.33 | 12.28 | 0.01371693 | AT1G76680 | ATOPR1_OPR1__12-oxophytodienoate reductase 1                                                                                                                                                                                                                                                                                                                                                                                                                                                                                                                                                                                                                                                      |

|      |       |      |       |            |           |                                                                                                                                                                                                                                                                                                                |
|------|-------|------|-------|------------|-----------|----------------------------------------------------------------------------------------------------------------------------------------------------------------------------------------------------------------------------------------------------------------------------------------------------------------|
| 2.52 | 9.77  | 1.33 | 9.1   | 0.00294186 | AT5G31891 |                                                                                                                                                                                                                                                                                                                |
| 2.51 | 10.47 | 1.33 | 9.8   | 0.02467167 | AT2G16230 | O-Glycosyl hydrolases family 17 protein<br>unknown protein; BEST Arabidopsis thaliana protein match is: unknown protein (TAIR:AT5G36920.1); Has 9 Blast hits to 9 proteins in 2 species: Archae - 0; Bacteria - 0; Metazoa - 0; Fungi - 0; Plants - 9; Viruses - 0; Other Eukaryotes - 0 (source: NCBI BLink). |
| 2.5  | 11.12 | 1.32 | 10.46 | 0.00420969 | AT5G36925 | Chaperone DnaJ-domain superfamily protein Chaperone DnaJ-domain superfamily protein                                                                                                                                                                                                                            |
| 2.49 | 13.5  | 1.32 | 12.84 | 0.00603002 | AT1G72416 | Chaperone DnaJ-domain superfamily protein Chaperone DnaJ-domain superfamily protein                                                                                                                                                                                                                            |
| 2.48 | 12.35 | 1.31 | 11.7  | 0.03671352 | AT1G49230 | RING/U-box superfamily protein                                                                                                                                                                                                                                                                                 |
| 2.48 | 12.67 | 1.31 | 12.02 | 0.03724128 | AT3G43190 | ATSUS4_SUS4__sucrose synthase 4<br>unknown protein; BEST Arabidopsis thaliana protein match is: unknown protein (TAIR:AT3G48180.1); Has 88 Blast hits to 88 proteins in 15 species: Archae - 0; Bacteria - 0; Metazoa - 0; Fungi - 0; Plants - 88; Viruses - 0; Other Eukaryotes - 0 (source: NCBI BLink).     |
| 2.47 | 12.52 | 1.31 | 11.86 | 0.0107702  | AT1G19020 | JAL23__jacalin-related lectin 23                                                                                                                                                                                                                                                                               |
| 2.47 | 12.3  | 1.3  | 11.64 | 0.02001256 | AT2G39330 | unknown protein; FUNCTIONS IN: molecular_function unknown; INVOLVED IN: biological_process unknown; LOCATED IN: cellular_component unknown; EXPRESSED IN: 20 plant structures; EXPRESSED DURING: 10 growth stages; BEST Arabidopsis thaliana protein match is: unknown protein (TAIR:AT1G68440.1).             |
| 2.46 | 14.53 | 1.3  | 13.88 | 0.00494369 | AT1G25400 | Serine/threonine-protein kinase WNK (With No Lysine)-related                                                                                                                                                                                                                                                   |
| 2.46 | 12.25 | 1.3  | 11.6  | 0.00811381 | AT3G15240 | ATWRKY75_WRKY75__WRKY DNA-binding protein 75                                                                                                                                                                                                                                                                   |
| 2.46 | 12.71 | 1.3  | 12.06 | 0.01863454 | AT5G13080 | JAZ8_TIFY5A__jasmonate-zim-domain protein 8                                                                                                                                                                                                                                                                    |
| 2.45 | 6.82  | 1.29 | 6.17  | 0.01273993 | AT1G30135 | F-ATMBP_MBP1.2_MBP2__myrosinase-binding protein 2                                                                                                                                                                                                                                                              |
| 2.45 | 12.38 | 1.29 | 11.73 | 0.02622766 | AT1G52030 | Chaperone DnaJ-domain superfamily protein Chaperone DnaJ-domain superfamily protein                                                                                                                                                                                                                            |
| 2.45 | 13.61 | 1.29 | 12.96 | 0.00601931 | AT1G72416 | Chaperone DnaJ-domain superfamily protein Chaperone DnaJ-domain superfamily protein                                                                                                                                                                                                                            |
| 2.45 | 12.51 | 1.29 | 11.87 | 0.02551503 | AT4G06746 | DEAR5_RAP2.9__related to AP2 9<br>unknown protein; BEST Arabidopsis thaliana protein match is: unknown protein (TAIR:AT5G12340.1); Has 166 Blast hits to 162 proteins in 36 species: Archae - 0; Bacteria - 2; Metazoa - 15; Fungi - 5; Plants - 124; Viruses - 0; Other Eukaryotes - 20 (source: NCBI BLink). |
| 2.44 | 13.35 | 1.29 | 12.71 | 0.00506342 | AT1G28190 | DAG1__Dof-type zinc finger DNA-binding family protein                                                                                                                                                                                                                                                          |
| 2.44 | 13.86 | 1.28 | 13.22 | 0.00315341 | AT3G61850 |                                                                                                                                                                                                                                                                                                                |
| 2.44 | 10.26 | 1.29 | 9.62  | 0.00356968 | AT4G06714 |                                                                                                                                                                                                                                                                                                                |
| 2.44 | 11.24 | 1.29 | 10.59 | 0.00753143 | AT4G30090 |                                                                                                                                                                                                                                                                                                                |
| 2.44 | 10.87 | 1.29 | 10.22 | 0.0031719  | AT5G29465 |                                                                                                                                                                                                                                                                                                                |
| 2.43 | 12.2  | 1.28 | 11.55 | 0.003464   | AT1G72060 | serine-type endopeptidase inhibitors                                                                                                                                                                                                                                                                           |
| 2.42 | 11.29 | 1.28 | 10.65 | 0.01133233 | AT1G30550 | S-adenosyl-L-methionine-dependent methyltransferases superfamily protein                                                                                                                                                                                                                                       |
| 2.42 | 12.58 | 1.27 | 11.94 | 0.00568994 | AT5G47960 | ATRABA4C_RABA4C_SMG1__RAB GTPase homolog A4C                                                                                                                                                                                                                                                                   |
| 2.41 | 11.79 | 1.27 | 11.15 | 0.01324128 | AT1G33750 | Terpenoid cyclases/Protein prenyltransferases superfamily protein                                                                                                                                                                                                                                              |
| 2.41 | 13.37 | 1.27 | 12.74 | 0.02350016 | AT1G49860 | ATGSTF14_GSTF14__glutathione S-transferase (class phi) 14                                                                                                                                                                                                                                                      |

|      |       |      |       |            |           |                                                                                                                                                                                                                                                                                                                                                                                                                                                                                                     |
|------|-------|------|-------|------------|-----------|-----------------------------------------------------------------------------------------------------------------------------------------------------------------------------------------------------------------------------------------------------------------------------------------------------------------------------------------------------------------------------------------------------------------------------------------------------------------------------------------------------|
| 2.41 | 7.25  | 1.27 | 6.62  | 0.04331841 | AT2G03660 |                                                                                                                                                                                                                                                                                                                                                                                                                                                                                                     |
| 2.41 | 10.78 | 1.27 | 10.14 | 0.00433482 | AT5G32125 |                                                                                                                                                                                                                                                                                                                                                                                                                                                                                                     |
| 2.4  | 12.34 | 1.26 | 11.71 | 0.01832168 | AT1G10550 | XET_XTH33__xyloglucan:xyloglucosyl transferase 33                                                                                                                                                                                                                                                                                                                                                                                                                                                   |
| 2.4  | 12.19 | 1.26 | 11.56 | 0.00907007 | AT3G22740 | HMT3__homocysteine S-methyltransferase 3                                                                                                                                                                                                                                                                                                                                                                                                                                                            |
| 2.4  | 11.85 | 1.27 | 11.21 | 0.00764764 | AT4G23470 | PLAC8 family protein                                                                                                                                                                                                                                                                                                                                                                                                                                                                                |
|      |       |      |       |            |           | unknown protein; FUNCTIONS IN: molecular_function unknown; INVOLVED IN: response to karrikin; LOCATED IN: endomembrane system; EXPRESSED IN: cotyledon, hypocotyl, leaf; EXPRESSED DURING: LP.04 four leaves visible; BEST Arabidopsis thaliana protein match is: unknown protein (TAIR:AT2G23270.1); Has 30201 Blast hits to 17322 proteins in 780 species: Archae - 12; Bacteria - 1396; Metazoa - 17338; Fungi - 3422; Plants - 5037; Viruses - 0; Other Eukaryotes - 2996 (source: NCBI BLink). |
| 2.4  | 9.67  | 1.26 | 9.04  | 0.00746565 | AT4G37290 | Eukaryotes - 2996 (source: NCBI BLink).                                                                                                                                                                                                                                                                                                                                                                                                                                                             |
| 2.4  | 13.21 | 1.26 | 12.58 | 0.01166694 | AT5G19520 | ATMSL9_MSL9__mechanosensitive channel of small conductance-like 9                                                                                                                                                                                                                                                                                                                                                                                                                                   |
| 2.39 | 9.44  | 1.26 | 8.81  | 0.00528978 | AT1G12610 | DDF1__Integrase-type DNA-binding superfamily protein                                                                                                                                                                                                                                                                                                                                                                                                                                                |
| 2.39 | 12.37 | 1.26 | 11.74 | 0.00585398 | AT1G67110 | CYP735A2__cytochrome P450, family 735, subfamily A, polypeptide 2                                                                                                                                                                                                                                                                                                                                                                                                                                   |
| 2.39 | 13.03 | 1.25 | 12.4  | 0.00266801 | AT5G59820 | RHL41_ZAT12__C2H2-type zinc finger family protein                                                                                                                                                                                                                                                                                                                                                                                                                                                   |
| 2.39 | 12.79 | 1.25 | 12.16 | 0.00420934 | AT5G64660 | ATCMPG2_CMPG2__CYS, MET, PRO, and GLY protein 2                                                                                                                                                                                                                                                                                                                                                                                                                                                     |
| 2.38 | 9.64  | 1.25 | 9.02  | 0.00426996 | AT1G38410 |                                                                                                                                                                                                                                                                                                                                                                                                                                                                                                     |
| 2.38 | 14.35 | 1.25 | 13.72 | 0.00442816 | ATCG00410 |                                                                                                                                                                                                                                                                                                                                                                                                                                                                                                     |
| 2.37 | 11.94 | 1.24 | 11.32 | 0.00479295 | AT2G06250 |                                                                                                                                                                                                                                                                                                                                                                                                                                                                                                     |
|      |       |      |       |            |           | unknown protein; BEST Arabidopsis thaliana protein match is: unknown protein (TAIR:AT4G34419.1); Has 51 Blast hits to 51 proteins in 10 species: Archae - 0; Bacteria - 0; Metazoa - 0; Fungi - 0; Plants - 51; Viruses - 0; Other Eukaryotes - 0 (source: NCBI BLink).                                                                                                                                                                                                                             |
| 2.37 | 10.59 | 1.25 | 9.97  | 0.00485976 | AT3G19200 | Metazoa - 0; Fungi - 0; Plants - 51; Viruses - 0; Other Eukaryotes - 0 (source: NCBI BLink).                                                                                                                                                                                                                                                                                                                                                                                                        |
| 2.37 | 9.76  | 1.25 | 9.13  | 0.01176783 | AT3G24310 | ATMYB71_MYB305__myb domain protein 305                                                                                                                                                                                                                                                                                                                                                                                                                                                              |
| 2.37 | 9.92  | 1.24 | 9.3   | 0.00309366 | AT5G33389 |                                                                                                                                                                                                                                                                                                                                                                                                                                                                                                     |
| 2.37 | 9.07  | 1.24 | 8.45  | 0.01404349 | AT5G41550 | Disease resistance protein (TIR-NBS-LRR class) family                                                                                                                                                                                                                                                                                                                                                                                                                                               |
| 2.36 | 13.41 | 1.24 | 12.79 | 0.00833976 | AT1G67810 | SUFE2__sulfur E2                                                                                                                                                                                                                                                                                                                                                                                                                                                                                    |
| 2.36 | 9.73  | 1.24 | 9.11  | 0.00897246 | AT5G09980 | PROPEP4__elicitor peptide 4 precursor                                                                                                                                                                                                                                                                                                                                                                                                                                                               |
|      |       |      |       |            |           | AtERF73_ERF73_HRE1__Integrase-type DNA-binding superfamily protein                                                                                                                                                                                                                                                                                                                                                                                                                                  |
| 2.35 | 13.89 | 1.23 | 13.28 | 0.00294186 | AT1G72360 | AtERF73_ERF73_HRE1__Integrase-type DNA-binding superfamily protein                                                                                                                                                                                                                                                                                                                                                                                                                                  |
| 2.35 | 12.31 | 1.23 | 11.69 | 0.00634237 | AT3G28340 | GATL10_GolS8__galacturonosyltransferase-like 10                                                                                                                                                                                                                                                                                                                                                                                                                                                     |
| 2.35 | 9.36  | 1.23 | 8.74  | 0.00463762 | AT3G43157 |                                                                                                                                                                                                                                                                                                                                                                                                                                                                                                     |
| 2.35 | 11.7  | 1.23 | 11.09 | 0.00429467 | AT3G61190 | BAP1__BON association protein 1                                                                                                                                                                                                                                                                                                                                                                                                                                                                     |
| 2.35 | 11.5  | 1.24 | 10.88 | 0.00660299 | AT4G38340 | Plant regulator RWP-RK family protein                                                                                                                                                                                                                                                                                                                                                                                                                                                               |
| 2.34 | 13.68 | 1.23 | 13.07 | 0.04348436 | AT2G41100 | ATCAL4_TCH3__Calcium-binding EF hand family protein                                                                                                                                                                                                                                                                                                                                                                                                                                                 |
| 2.34 | 11.51 | 1.23 | 10.9  | 0.00375986 | AT3G30695 |                                                                                                                                                                                                                                                                                                                                                                                                                                                                                                     |
| 2.34 | 11.81 | 1.23 | 11.2  | 0.00398842 | AT3G33067 |                                                                                                                                                                                                                                                                                                                                                                                                                                                                                                     |

|      |       |      |       |            |           |                                                                                                                                                                                                                                                                                                                                                                                                                                                                         |
|------|-------|------|-------|------------|-----------|-------------------------------------------------------------------------------------------------------------------------------------------------------------------------------------------------------------------------------------------------------------------------------------------------------------------------------------------------------------------------------------------------------------------------------------------------------------------------|
| 2.34 | 12.51 | 1.23 | 11.9  | 0.00413198 | AT3G51910 | AT-HSFA7A_HSFA7A__heat shock transcription factor A7A                                                                                                                                                                                                                                                                                                                                                                                                                   |
| 2.34 | 13.49 | 1.23 | 12.88 | 0.00495965 | AT4G37390 | AUR3_BRU6_GH3-2_GH3.2_YDK1__Auxin-responsive GH3 family protein<br>unknown protein; BEST Arabidopsis thaliana protein match is: unknown protein<br>(TAIR:AT1G28190.1); Has 30201 Blast hits to 17322 proteins in 780 species: Archae - 12;<br>Bacteria - 1396; Metazoa - 17338; Fungi - 3422; Plants - 5037; Viruses - 0; Other Eukaryotes -<br>2996 (source: NCBI BLink).                                                                                              |
| 2.33 | 12.41 | 1.22 | 11.8  | 0.00686073 | AT5G12340 | ethylene-responsive nuclear protein -related                                                                                                                                                                                                                                                                                                                                                                                                                            |
| 2.33 | 9.15  | 1.22 | 8.54  | 0.00356968 | AT5G44350 | PCK2_PEPCK__phosphoenolpyruvate carboxykinase 2                                                                                                                                                                                                                                                                                                                                                                                                                         |
| 2.33 | 13.08 | 1.22 | 12.47 | 0.03348692 | AT5G65690 | G6PD3__glucose-6-phosphate dehydrogenase 3                                                                                                                                                                                                                                                                                                                                                                                                                              |
| 2.32 | 14.4  | 1.22 | 13.79 | 0.00229082 | AT1G24280 |                                                                                                                                                                                                                                                                                                                                                                                                                                                                         |
| 2.32 | 10.73 | 1.22 | 10.12 | 0.00309366 | AT1G40072 | AtERF73_ERF73_HRE1__Integrase-type DNA-binding superfamily protein                                                                                                                                                                                                                                                                                                                                                                                                      |
| 2.32 | 13.81 | 1.21 | 13.2  | 0.00517823 | AT1G72360 | AtERF73_ERF73_HRE1__Integrase-type DNA-binding superfamily protein                                                                                                                                                                                                                                                                                                                                                                                                      |
| 2.32 | 10.6  | 1.21 | 9.99  | 0.0061602  | AT2G07789 |                                                                                                                                                                                                                                                                                                                                                                                                                                                                         |
| 2.32 | 11.61 | 1.22 | 11    | 0.0046141  | AT3G32880 |                                                                                                                                                                                                                                                                                                                                                                                                                                                                         |
| 2.32 | 13.49 | 1.21 | 12.88 | 0.003464   | AT3G47980 | AtNITR2;2Integral membrane HPP family protein                                                                                                                                                                                                                                                                                                                                                                                                                           |
| 2.32 | 14.64 | 1.21 | 14.04 | 0.00696469 | AT4G11280 | ACS6_ATACS6__1-aminocyclopropane-1-carboxylic acid (acc) synthase 6                                                                                                                                                                                                                                                                                                                                                                                                     |
| 2.32 | 12.88 | 1.21 | 12.27 | 0.00429467 | AT4G24015 | RING/U-box superfamily protein                                                                                                                                                                                                                                                                                                                                                                                                                                          |
| 2.32 | 7.92  | 1.21 | 7.31  | 0.00508871 | AT5G33384 |                                                                                                                                                                                                                                                                                                                                                                                                                                                                         |
| 2.31 | 10.83 | 1.21 | 10.22 | 0.00356968 | AT1G40095 | Plant protein of unknown function (DUF247) Plant protein of unknown function (DUF247) Plant<br>protein of unknown function (DUF247)                                                                                                                                                                                                                                                                                                                                     |
| 2.31 | 10.46 | 1.21 | 9.85  | 0.00605413 | AT1G67150 | DOT1__Glycine-rich protein family                                                                                                                                                                                                                                                                                                                                                                                                                                       |
| 2.31 | 11.12 | 1.21 | 10.52 | 0.00804254 | AT2G36120 | ABCG16__ABC-2 type transporter family protein                                                                                                                                                                                                                                                                                                                                                                                                                           |
| 2.31 | 11.99 | 1.21 | 11.39 | 0.00507483 | AT3G55090 | MATE efflux family protein                                                                                                                                                                                                                                                                                                                                                                                                                                              |
| 2.31 | 12.3  | 1.21 | 11.69 | 0.01013972 | AT5G52050 | Carbohydrate-binding X8 domain superfamily protein                                                                                                                                                                                                                                                                                                                                                                                                                      |
| 2.3  | 13.45 | 1.2  | 12.85 | 0.0047211  | AT1G09460 |                                                                                                                                                                                                                                                                                                                                                                                                                                                                         |
| 2.3  | 10.28 | 1.2  | 9.68  | 0.00394474 | AT1G43750 |                                                                                                                                                                                                                                                                                                                                                                                                                                                                         |
| 2.3  | 11.15 | 1.2  | 10.55 | 0.00404201 | AT4G06720 | unknown protein; FUNCTIONS IN: molecular_function unknown; INVOLVED IN: response to<br>wounding; LOCATED IN: endomembrane system; EXPRESSED IN: 23 plant structures;<br>EXPRESSED DURING: 13 growth stages; BEST Arabidopsis thaliana protein match is: unknown<br>protein (TAIR:AT1G32928.1); Has 42 Blast hits to 42 proteins in 8 species: Archae - 0; Bacteria -<br>0; Metazoa - 0; Fungi - 0; Plants - 42; Viruses - 0; Other Eukaryotes - 0 (source: NCBI BLink). |
| 2.29 | 14.27 | 1.2  | 13.67 | 0.00326047 | AT1G32920 |                                                                                                                                                                                                                                                                                                                                                                                                                                                                         |
| 2.29 | 11.32 | 1.19 | 10.72 | 0.00356968 | AT1G40093 |                                                                                                                                                                                                                                                                                                                                                                                                                                                                         |
| 2.29 | 10.23 | 1.2  | 9.63  | 0.00453585 | AT4G06666 |                                                                                                                                                                                                                                                                                                                                                                                                                                                                         |
| 2.29 | 11.64 | 1.2  | 11.05 | 0.00394838 | AT4G06712 |                                                                                                                                                                                                                                                                                                                                                                                                                                                                         |
| 2.29 | 12.22 | 1.19 | 11.62 | 0.00309366 | AT5G13700 | APAO_ATPAO1_PAO1__polyamine oxidase 1                                                                                                                                                                                                                                                                                                                                                                                                                                   |

|      |       |      |       |            |           |                                                                                                                                                                                                                                                                                                                                                                                      |
|------|-------|------|-------|------------|-----------|--------------------------------------------------------------------------------------------------------------------------------------------------------------------------------------------------------------------------------------------------------------------------------------------------------------------------------------------------------------------------------------|
| 2.28 | 12.45 | 1.19 | 11.86 | 0.00801286 | AT1G30040 | ATGA2OX2_GA2OX2_GA2OX2__gibberellin 2-oxidase                                                                                                                                                                                                                                                                                                                                        |
| 2.28 | 10.99 | 1.19 | 10.4  | 0.00309366 | AT1G40150 |                                                                                                                                                                                                                                                                                                                                                                                      |
| 2.28 | 10.5  | 1.19 | 9.91  | 0.00221781 | AT2G34000 | RING/U-box superfamily protein                                                                                                                                                                                                                                                                                                                                                       |
| 2.28 | 13.08 | 1.19 | 12.49 | 0.00470122 | AT3G02800 | AtPFA-DSP3_PFA-DSP3__Tyrosine phosphatase family protein                                                                                                                                                                                                                                                                                                                             |
| 2.28 | 8.02  | 1.19 | 7.43  | 0.00373629 | AT4G04170 |                                                                                                                                                                                                                                                                                                                                                                                      |
| 2.28 | 11.6  | 1.19 | 11.01 | 0.00341128 | AT4G06573 |                                                                                                                                                                                                                                                                                                                                                                                      |
| 2.28 | 8.93  | 1.19 | 8.34  | 0.00962979 | AT5G29295 |                                                                                                                                                                                                                                                                                                                                                                                      |
| 2.28 | 12.62 | 1.19 | 12.02 | 0.00568994 | AT5G57090 | AGR_AGR1_ATPIN2_EIR1_MM31_PIN2_WAV6__Auxin efflux carrier family protein                                                                                                                                                                                                                                                                                                             |
| 2.28 | 10.07 | 1.19 | 9.47  | 0.04272545 | AT5G66640 | DAR3__DA1-related protein 3                                                                                                                                                                                                                                                                                                                                                          |
| 2.27 | 13.26 | 1.18 | 12.66 | 0.00417125 | AT1G14540 | Peroxidase superfamily protein<br>unknown protein; BEST Arabidopsis thaliana protein match is: unknown protein (TAIR:AT1G32920.1); Has 35333 Blast hits to 34131 proteins in 2444 species: Archae - 798; Bacteria - 22429; Metazoa - 974; Fungi - 991; Plants - 531; Viruses - 0; Other Eukaryotes - 9610 (source: NCBI BLink).                                                      |
| 2.27 | 13.05 | 1.18 | 12.46 | 0.0134514  | AT1G32928 |                                                                                                                                                                                                                                                                                                                                                                                      |
| 2.27 | 11.41 | 1.18 | 10.82 | 0.00811178 | AT1G52560 | HSP20-like chaperones superfamily protein HSP20-like chaperones superfamily protein                                                                                                                                                                                                                                                                                                  |
| 2.27 | 13.49 | 1.18 | 12.9  | 0.00309366 | AT1G61820 | BGLU46__beta glucosidase 46 BGLU46__beta glucosidase 46                                                                                                                                                                                                                                                                                                                              |
| 2.27 | 10.1  | 1.18 | 9.51  | 0.01079271 | AT2G04500 | Cysteine/Histidine-rich C1 domain family protein                                                                                                                                                                                                                                                                                                                                     |
| 2.27 | 12.78 | 1.18 | 12.19 | 0.01420608 | AT2G07743 | unknown protein; FUNCTIONS IN: molecular_function unknown; INVOLVED IN: biological_process unknown; LOCATED IN: mitochondrion; BEST Arabidopsis thaliana protein match is: unknown protein (TAIR:AT2G18210.1); Has 19 Blast hits to 19 proteins in 2 species: Archae - 0; Bacteria - 0; Metazoa - 0; Fungi - 0; Plants - 19; Viruses - 0; Other Eukaryotes - 0 (source: NCBI BLink). |
| 2.27 | 9.28  | 1.18 | 8.69  | 0.00928874 | AT2G18200 |                                                                                                                                                                                                                                                                                                                                                                                      |
| 2.27 | 11.14 | 1.18 | 10.55 | 0.01615124 | AT4G32800 | Integrase-type DNA-binding superfamily protein                                                                                                                                                                                                                                                                                                                                       |
| 2.27 | 10.55 | 1.18 | 9.95  | 0.00601931 | AT5G29550 |                                                                                                                                                                                                                                                                                                                                                                                      |
| 2.27 | 11.73 | 1.18 | 11.14 | 0.00426996 | AT5G32107 |                                                                                                                                                                                                                                                                                                                                                                                      |
| 2.27 | 13.47 | 1.18 | 12.88 | 0.01998812 | AT5G63660 | LCR74_PDF2.5__Scorpion toxin-like knottin superfamily protein                                                                                                                                                                                                                                                                                                                        |
| 2.27 | 12.23 | 1.18 | 11.64 | 0.02355063 | AT5G66940 | Dof-type zinc finger DNA-binding family protein                                                                                                                                                                                                                                                                                                                                      |
| 2.26 | 12.56 | 1.18 | 11.97 | 0.00939186 | AT1G02810 | Plant invertase/pectin methylesterase inhibitor superfamily                                                                                                                                                                                                                                                                                                                          |
| 2.26 | 9.83  | 1.17 | 9.24  | 0.01156554 | AT1G39270 |                                                                                                                                                                                                                                                                                                                                                                                      |
| 2.26 | 11.44 | 1.18 | 10.86 | 0.02108292 | AT2G18480 | Major facilitator superfamily protein                                                                                                                                                                                                                                                                                                                                                |
| 2.26 | 11.46 | 1.17 | 10.87 | 0.00714664 | AT3G43303 |                                                                                                                                                                                                                                                                                                                                                                                      |
| 2.26 | 12.7  | 1.18 | 12.12 | 0.00508871 | AT4G00940 | Dof-type zinc finger DNA-binding family protein                                                                                                                                                                                                                                                                                                                                      |
| 2.26 | 12.45 | 1.18 | 11.86 | 0.01398274 | AT5G48940 | Leucine-rich repeat transmembrane protein kinase family protein<br>BEST Arabidopsis thaliana protein match is: Plant invertase/pectin methylesterase inhibitor superfamily protein (TAIR:AT5G62340.1); Has 9 Blast hits to 9 proteins in 2 species: Archae - 0;                                                                                                                      |
| 2.26 | 10.8  | 1.18 | 10.21 | 0.02583341 | AT5G62330 |                                                                                                                                                                                                                                                                                                                                                                                      |



|      |       |      |       |            |           |                                                                                                                                                                                                                                                                                                                                                                                                                                                                                                                                                                                                                                                                                                             |
|------|-------|------|-------|------------|-----------|-------------------------------------------------------------------------------------------------------------------------------------------------------------------------------------------------------------------------------------------------------------------------------------------------------------------------------------------------------------------------------------------------------------------------------------------------------------------------------------------------------------------------------------------------------------------------------------------------------------------------------------------------------------------------------------------------------------|
|      |       |      |       |            |           | Bacteria - 0; Metazoa - 0; Fungi - 0; Plants - 9; Viruses - 0; Other Eukaryotes - 0 (source: NCBI BLink).                                                                                                                                                                                                                                                                                                                                                                                                                                                                                                                                                                                                   |
| 2.25 | 10.36 | 1.17 | 9.78  | 0.00756439 | AT1G69920 | ATGSTU12_GSTU12__glutathione S-transferase TAU 12                                                                                                                                                                                                                                                                                                                                                                                                                                                                                                                                                                                                                                                           |
| 2.25 | 14.12 | 1.17 | 13.53 | 0.00294186 | AT1G71400 | AtRLP12_RLP12__receptor like protein 12<br>unknown protein; Has 30201 Blast hits to 17322 proteins in 780 species: Archae - 12; Bacteria - 1396; Metazoa - 17338; Fungi - 3422; Plants - 5037; Viruses - 0; Other Eukaryotes - 2996 (source: NCBI BLink).                                                                                                                                                                                                                                                                                                                                                                                                                                                   |
| 2.25 | 13.23 | 1.17 | 12.65 | 0.00438308 | AT2G07825 | NCBI BLink).                                                                                                                                                                                                                                                                                                                                                                                                                                                                                                                                                                                                                                                                                                |
| 2.24 | 12.74 | 1.16 | 12.16 | 0.00610609 | AT1G33790 | jacalin lectin family protein jacalin lectin family protein<br>Plant protein of unknown function (DUF247) Plant protein of unknown function (DUF247) Plant protein of unknown function (DUF247)                                                                                                                                                                                                                                                                                                                                                                                                                                                                                                             |
| 2.24 | 10.84 | 1.16 | 10.26 | 0.00694229 | AT1G67150 | protein of unknown function (DUF247)                                                                                                                                                                                                                                                                                                                                                                                                                                                                                                                                                                                                                                                                        |
| 2.24 | 10.65 | 1.17 | 10.07 | 0.01391174 | AT2G23630 | sks16__SKU5 similar 16                                                                                                                                                                                                                                                                                                                                                                                                                                                                                                                                                                                                                                                                                      |
| 2.24 | 8.47  | 1.16 | 7.89  | 0.0097881  | AT2G31920 | Plant protein of unknown function (DUF936)                                                                                                                                                                                                                                                                                                                                                                                                                                                                                                                                                                                                                                                                  |
| 2.24 | 10.57 | 1.16 | 9.99  | 0.02443705 | AT3G30340 | nodulin MtN21 /EamA-like transporter family protein                                                                                                                                                                                                                                                                                                                                                                                                                                                                                                                                                                                                                                                         |
| 2.24 | 8.97  | 1.16 | 8.39  | 0.00323071 | AT4G08104 |                                                                                                                                                                                                                                                                                                                                                                                                                                                                                                                                                                                                                                                                                                             |
| 2.24 | 9.03  | 1.16 | 8.45  | 0.00593185 | AT4G08114 |                                                                                                                                                                                                                                                                                                                                                                                                                                                                                                                                                                                                                                                                                                             |
| 2.24 | 12.38 | 1.17 | 11.79 | 0.02573479 | AT5G13900 | Bifunctional inhibitor/lipid-transfer protein/seed storage 2S albumin superfamily protein                                                                                                                                                                                                                                                                                                                                                                                                                                                                                                                                                                                                                   |
| 2.24 | 7.68  | 1.16 | 7.1   | 0.01448673 | AT5G29436 |                                                                                                                                                                                                                                                                                                                                                                                                                                                                                                                                                                                                                                                                                                             |
| 2.24 | 9.81  | 1.17 | 9.22  | 0.00514085 | AT5G31719 |                                                                                                                                                                                                                                                                                                                                                                                                                                                                                                                                                                                                                                                                                                             |
| 2.24 | 11.18 | 1.16 | 10.6  | 0.00525197 | AT5G31855 |                                                                                                                                                                                                                                                                                                                                                                                                                                                                                                                                                                                                                                                                                                             |
| 2.24 | 13.18 | 1.16 | 12.6  | 0.01645617 | ATCG00230 |                                                                                                                                                                                                                                                                                                                                                                                                                                                                                                                                                                                                                                                                                                             |
| 2.23 | 9.76  | 1.16 | 9.18  | 0.00479295 | AT1G37537 |                                                                                                                                                                                                                                                                                                                                                                                                                                                                                                                                                                                                                                                                                                             |
| 2.23 | 10.77 | 1.16 | 10.19 | 0.00540858 | AT1G39990 |                                                                                                                                                                                                                                                                                                                                                                                                                                                                                                                                                                                                                                                                                                             |
| 2.23 | 10.68 | 1.16 | 10.1  | 0.00750343 | AT1G67150 | Plant protein of unknown function (DUF247) Plant protein of unknown function (DUF247) Plant protein of unknown function (DUF247)<br>RGF4__Encodes a root meristem growth factor (RGF). Belongs to a family of functionally redundant homologous peptides that are secreted, tyrosine-sulfated, and expressed mainly in the stem cell area and the innermost layer of central columella cells. RGFs are required for maintenance of the root stem cell niche and transit amplifying cell proliferation. Members of this family include: At5g60810 (RGF1), At1g13620 (RGF2), At2g04025 (RGF3), At3g30350 (RGF4), At5g51451 (RGF5), At4g16515 (RGF6), At3g02240 (RGF7), At2g03830 (RGF8) and At5g64770 (RGF9). |
| 2.23 | 9.5   | 1.16 | 8.92  | 0.02742724 | AT3G30350 |                                                                                                                                                                                                                                                                                                                                                                                                                                                                                                                                                                                                                                                                                                             |
| 2.23 | 10.39 | 1.16 | 9.81  | 0.00306866 | AT3G30767 |                                                                                                                                                                                                                                                                                                                                                                                                                                                                                                                                                                                                                                                                                                             |
| 2.23 | 9.29  | 1.16 | 8.71  | 0.00358222 | AT4G06578 |                                                                                                                                                                                                                                                                                                                                                                                                                                                                                                                                                                                                                                                                                                             |
| 2.23 | 12.42 | 1.15 | 11.84 | 0.0047933  | AT4G06656 |                                                                                                                                                                                                                                                                                                                                                                                                                                                                                                                                                                                                                                                                                                             |
| 2.23 | 10.01 | 1.16 | 9.43  | 0.0032853  | AT4G07456 |                                                                                                                                                                                                                                                                                                                                                                                                                                                                                                                                                                                                                                                                                                             |
| 2.23 | 12.43 | 1.16 | 11.85 | 0.00608255 | AT4G15120 | VQ motif-containing protein                                                                                                                                                                                                                                                                                                                                                                                                                                                                                                                                                                                                                                                                                 |

|      |       |      |       |            |           |                                                                                                                                                                                                                                                                                                                                                                                                                                                              |
|------|-------|------|-------|------------|-----------|--------------------------------------------------------------------------------------------------------------------------------------------------------------------------------------------------------------------------------------------------------------------------------------------------------------------------------------------------------------------------------------------------------------------------------------------------------------|
| 2.23 | 12.92 | 1.16 | 12.34 | 0.00760062 | AT5G08350 | GRAM domain-containing protein / ABA-responsive protein-related                                                                                                                                                                                                                                                                                                                                                                                              |
| 2.23 | 12.45 | 1.16 | 11.87 | 0.00902402 | AT5G35580 | Protein kinase superfamily protein                                                                                                                                                                                                                                                                                                                                                                                                                           |
| 2.22 | 10.96 | 1.15 | 10.38 | 0.01048515 | AT1G52560 | HSP20-like chaperones superfamily protein HSP20-like chaperones superfamily protein                                                                                                                                                                                                                                                                                                                                                                          |
| 2.22 | 8.43  | 1.15 | 7.85  | 0.00422741 | AT2G09865 |                                                                                                                                                                                                                                                                                                                                                                                                                                                              |
| 2.22 | 11.59 | 1.15 | 11.01 | 0.00429467 | AT2G09930 |                                                                                                                                                                                                                                                                                                                                                                                                                                                              |
| 2.22 | 10.67 | 1.15 | 10.09 | 0.00507084 | AT2G10880 |                                                                                                                                                                                                                                                                                                                                                                                                                                                              |
| 2.22 | 11.23 | 1.15 | 10.66 | 0.02026545 | AT2G23050 | MEL4_NPY4__Phototropic-responsive NPH3 family protein<br>unknown protein; FUNCTIONS IN: molecular_function unknown; INVOLVED IN:<br>biological_process unknown; LOCATED IN: mitochondrion; BEST Arabidopsis thaliana protein<br>match is: unknown protein (TAIR:AT4G16090.1); Has 161 Blast hits to 161 proteins in 2 species:<br>Archae - 0; Bacteria - 0; Metazoa - 0; Fungi - 0; Plants - 161; Viruses - 0; Other Eukaryotes - 0<br>(source: NCBI BLink). |
| 2.22 | 9.4   | 1.15 | 8.82  | 0.00696556 | AT2G45930 |                                                                                                                                                                                                                                                                                                                                                                                                                                                              |
| 2.22 | 11.27 | 1.15 | 10.69 | 0.00309366 | AT3G42253 |                                                                                                                                                                                                                                                                                                                                                                                                                                                              |
| 2.22 | 15.04 | 1.15 | 14.47 | 0.00294186 | AT4G24570 | DIC2__dicarboxylate carrier 2                                                                                                                                                                                                                                                                                                                                                                                                                                |
| 2.22 | 8.67  | 1.15 | 8.09  | 0.00356968 | AT5G17960 | Cysteine/Histidine-rich C1 domain family protein                                                                                                                                                                                                                                                                                                                                                                                                             |
| 2.22 | 10.82 | 1.15 | 10.24 | 0.00876594 | AT5G31087 |                                                                                                                                                                                                                                                                                                                                                                                                                                                              |
| 2.22 | 10.02 | 1.15 | 9.45  | 0.00592108 | AT5G31980 |                                                                                                                                                                                                                                                                                                                                                                                                                                                              |
| 2.22 | 9.44  | 1.15 | 8.86  | 0.02146312 | AT5G31989 |                                                                                                                                                                                                                                                                                                                                                                                                                                                              |
| 2.22 | 7.47  | 1.15 | 6.89  | 0.01804554 | AT5G32580 | unknown protein; FUNCTIONS IN: molecular_function unknown; INVOLVED IN: anaerobic<br>respiration; LOCATED IN: endomembrane system; EXPRESSED IN: 13 plant structures;<br>EXPRESSED DURING: 6 growth stages; Has 20 Blast hits to 20 proteins in 8 species: Archae - 0;<br>Bacteria - 0; Metazoa - 0; Fungi - 0; Plants - 20; Viruses - 0; Other Eukaryotes - 0 (source: NCBI<br>BLink).                                                                      |
| 2.21 | 13.42 | 1.14 | 12.85 | 0.02114033 | AT1G33055 |                                                                                                                                                                                                                                                                                                                                                                                                                                                              |
| 2.21 | 9.99  | 1.14 | 9.42  | 0.00294186 | AT1G40101 |                                                                                                                                                                                                                                                                                                                                                                                                                                                              |
| 2.21 | 11.78 | 1.15 | 11.21 | 0.004055   | AT2G12832 |                                                                                                                                                                                                                                                                                                                                                                                                                                                              |
| 2.21 | 12.72 | 1.15 | 12.14 | 0.00356968 | AT3G15990 | SULTR3;4__sulfate transporter 3;4                                                                                                                                                                                                                                                                                                                                                                                                                            |
| 2.21 | 10.37 | 1.15 | 9.8   | 0.00410995 | AT3G32000 |                                                                                                                                                                                                                                                                                                                                                                                                                                                              |
| 2.21 | 10.89 | 1.15 | 10.31 | 0.00744705 | AT3G33066 |                                                                                                                                                                                                                                                                                                                                                                                                                                                              |
| 2.21 | 10.9  | 1.15 | 10.33 | 0.00294186 | AT4G06517 |                                                                                                                                                                                                                                                                                                                                                                                                                                                              |
| 2.21 | 11.75 | 1.14 | 11.18 | 0.00382427 | AT4G14370 | Disease resistance protein (TIR-NBS-LRR class) family                                                                                                                                                                                                                                                                                                                                                                                                        |
| 2.21 | 8.23  | 1.14 | 7.66  | 0.00730819 | AT5G51480 | SKS2__SKU5 similar 2                                                                                                                                                                                                                                                                                                                                                                                                                                         |
| 2.2  | 12.06 | 1.14 | 11.49 | 0.00470122 | AT1G19540 | NmrA-like negative transcriptional regulator family protein                                                                                                                                                                                                                                                                                                                                                                                                  |
| 2.2  | 10.6  | 1.14 | 10.03 | 0.00411612 | AT3G29730 |                                                                                                                                                                                                                                                                                                                                                                                                                                                              |
| 2.2  | 10.22 | 1.14 | 9.66  | 0.00286412 | AT3G33127 |                                                                                                                                                                                                                                                                                                                                                                                                                                                              |
| 2.2  | 11.68 | 1.14 | 11.11 | 0.00449194 | AT5G32179 |                                                                                                                                                                                                                                                                                                                                                                                                                                                              |

|      |       |      |       |            |           |                                                                                                                                                                                                                                                                                                                                |
|------|-------|------|-------|------------|-----------|--------------------------------------------------------------------------------------------------------------------------------------------------------------------------------------------------------------------------------------------------------------------------------------------------------------------------------|
| 2.2  | 14.36 | 1.14 | 13.79 | 0.003464   | AT5G61600 | ERF104__ethylene response factor 104                                                                                                                                                                                                                                                                                           |
| 2.19 | 6.99  | 1.13 | 6.42  | 0.00488479 | AT1G35610 | Cysteine/Histidine-rich C1 domain family protein                                                                                                                                                                                                                                                                               |
| 2.19 | 7.94  | 1.13 | 7.37  | 0.00432857 | AT2G13270 |                                                                                                                                                                                                                                                                                                                                |
| 2.19 | 10.8  | 1.13 | 10.24 | 0.01962777 | AT2G45760 | BAL_BAP2__BON association protein 2                                                                                                                                                                                                                                                                                            |
| 2.19 | 9.9   | 1.13 | 9.34  | 0.00395842 | AT3G33077 |                                                                                                                                                                                                                                                                                                                                |
| 2.19 | 12.39 | 1.13 | 11.83 | 0.0112008  | AT4G37160 | sks15__SKU5 similar 15                                                                                                                                                                                                                                                                                                         |
| 2.18 | 9.27  | 1.12 | 8.71  | 0.00442816 | AT1G40074 | unknown protein; FUNCTIONS IN: molecular_function unknown; INVOLVED IN: biological_process unknown; LOCATED IN: endomembrane system; Has 4 Blast hits to 4 proteins in 1 species: Archae - 0; Bacteria - 0; Metazoa - 0; Fungi - 0; Plants - 4; Viruses - 0; Other Eukaryotes - 0 (source: NCBI BLink).                        |
| 2.18 | 13.29 | 1.12 | 12.73 | 0.00429467 | AT3G20362 | NAD(P)-binding Rossmann-fold superfamily protein                                                                                                                                                                                                                                                                               |
| 2.18 | 12.99 | 1.12 | 12.43 | 0.00455724 | AT3G26770 |                                                                                                                                                                                                                                                                                                                                |
| 2.18 | 11.01 | 1.13 | 10.44 | 0.00508871 | AT4G06735 |                                                                                                                                                                                                                                                                                                                                |
| 2.18 | 10.68 | 1.12 | 10.12 | 0.00761033 | AT4G07355 |                                                                                                                                                                                                                                                                                                                                |
| 2.18 | 11.5  | 1.13 | 10.94 | 0.00426996 | AT5G34970 |                                                                                                                                                                                                                                                                                                                                |
| 2.18 | 12.81 | 1.13 | 12.25 | 0.01281651 | ATMG01070 |                                                                                                                                                                                                                                                                                                                                |
| 2.17 | 11.65 | 1.12 | 11.09 | 0.02424045 | AT1G12950 | RSH2__root hair specific 2                                                                                                                                                                                                                                                                                                     |
| 2.17 | 9.42  | 1.12 | 8.86  | 0.02042632 | AT1G19180 | JAZ1_TIFY10A__jasmonate-zim-domain protein 1<br>unknown protein; BEST Arabidopsis thaliana protein match is: unknown protein (TAIR:AT1G27030.1); Has 514 Blast hits to 514 proteins in 175 species: Archae - 0; Bacteria - 311; Metazoa - 0; Fungi - 0; Plants - 65; Viruses - 0; Other Eukaryotes - 138 (source: NCBI BLink). |
| 2.17 | 13.96 | 1.12 | 13.4  | 0.03453974 | AT1G27020 | scpl28__serine carboxypeptidase-like 28                                                                                                                                                                                                                                                                                        |
| 2.17 | 13.23 | 1.12 | 12.67 | 0.01773007 | AT2G35770 |                                                                                                                                                                                                                                                                                                                                |
| 2.17 | 12.07 | 1.12 | 11.51 | 0.00540585 | AT4G06485 |                                                                                                                                                                                                                                                                                                                                |
| 2.17 | 8.9   | 1.12 | 8.34  | 0.00543099 | AT4G07688 |                                                                                                                                                                                                                                                                                                                                |
| 2.17 | 11.09 | 1.12 | 10.53 | 0.0039427  | AT5G32053 |                                                                                                                                                                                                                                                                                                                                |
| 2.16 | 11.87 | 1.11 | 11.31 | 0.00603875 | AT1G33790 | jacalin lectin family protein jacalin lectin family protein                                                                                                                                                                                                                                                                    |
| 2.16 | 12.96 | 1.11 | 12.4  | 0.00284669 | AT2G39650 | Protein of unknown function (DUF506)                                                                                                                                                                                                                                                                                           |
| 2.16 | 11.86 | 1.11 | 11.31 | 0.00309366 | AT4G06730 |                                                                                                                                                                                                                                                                                                                                |
| 2.16 | 10.53 | 1.11 | 9.97  | 0.00885817 | AT5G31572 |                                                                                                                                                                                                                                                                                                                                |
| 2.16 | 10.62 | 1.11 | 10.06 | 0.00514085 | AT5G32516 |                                                                                                                                                                                                                                                                                                                                |
| 2.16 | 7.51  | 1.11 | 6.96  | 0.00481576 | AT5G40370 | GRXC2__Glutaredoxin family protein                                                                                                                                                                                                                                                                                             |
| 2.16 | 13.03 | 1.11 | 12.47 | 0.00480388 | AT5G51780 | basic helix-loop-helix (bHLH) DNA-binding superfamily protein                                                                                                                                                                                                                                                                  |
| 2.16 | 14.42 | 1.11 | 13.87 | 0.00371237 | ATCG00460 |                                                                                                                                                                                                                                                                                                                                |
| 2.15 | 10.44 | 1.1  | 9.89  | 0.02340024 | AT1G13480 | Protein of unknown function (DUF1262)                                                                                                                                                                                                                                                                                          |
| 2.15 | 13.68 | 1.11 | 13.13 | 0.03639728 | AT1G15125 | S-adenosyl-L-methionine-dependent methyltransferases superfamily protein                                                                                                                                                                                                                                                       |

|      |       |      |       |            |           |                                                                                                                                                                                                                                                                                                                                                                           |
|------|-------|------|-------|------------|-----------|---------------------------------------------------------------------------------------------------------------------------------------------------------------------------------------------------------------------------------------------------------------------------------------------------------------------------------------------------------------------------|
|      |       |      |       |            |           | unknown protein; BEST Arabidopsis thaliana protein match is: unknown protein (TAIR:AT1G72240.1); Has 1693 Blast hits to 236 proteins in 54 species: Archae - 0; Bacteria - 8; Metazoa - 451; Fungi - 116; Plants - 94; Viruses - 2; Other Eukaryotes - 1022 (source: NCBI BLink).                                                                                         |
| 2.15 | 11.45 | 1.1  | 10.9  | 0.00751295 | AT1G22470 |                                                                                                                                                                                                                                                                                                                                                                           |
| 2.15 | 8.69  | 1.1  | 8.14  | 0.00294186 | AT1G38280 |                                                                                                                                                                                                                                                                                                                                                                           |
| 2.15 | 10.65 | 1.1  | 10.1  | 0.00286412 | AT1G40100 |                                                                                                                                                                                                                                                                                                                                                                           |
| 2.15 | 11.69 | 1.11 | 11.14 | 0.0067964  | AT2G01818 | PLATZ transcription factor family protein                                                                                                                                                                                                                                                                                                                                 |
| 2.15 | 11.72 | 1.1  | 11.17 | 0.00413041 | AT2G10280 |                                                                                                                                                                                                                                                                                                                                                                           |
| 2.15 | 12.35 | 1.1  | 11.8  | 0.03245312 | AT3G12145 | FLOR1_FLR1__Leucine-rich repeat (LRR) family protein<br>unknown protein; FUNCTIONS IN: molecular_function unknown; INVOLVED IN: biological_process unknown; LOCATED IN: cellular_component unknown; Has 10 Blast hits to 10 proteins in 5 species: Archae - 0; Bacteria - 0; Metazoa - 0; Fungi - 0; Plants - 10; Viruses - 0; Other Eukaryotes - 0 (source: NCBI BLink). |
| 2.15 | 9.14  | 1.1  | 8.59  | 0.01226707 | AT3G19615 |                                                                                                                                                                                                                                                                                                                                                                           |
| 2.15 | 10.92 | 1.11 | 10.36 | 0.00407275 | AT3G37820 |                                                                                                                                                                                                                                                                                                                                                                           |
| 2.15 | 11.25 | 1.1  | 10.7  | 0.00540858 | AT4G06606 |                                                                                                                                                                                                                                                                                                                                                                           |
| 2.15 | 8.82  | 1.11 | 8.26  | 0.00625636 | AT4G36820 | Protein of unknown function (DUF607)                                                                                                                                                                                                                                                                                                                                      |
| 2.15 | 11.37 | 1.11 | 10.82 | 0.00581265 | AT5G29975 |                                                                                                                                                                                                                                                                                                                                                                           |
| 2.15 | 11.04 | 1.11 | 10.49 | 0.00434991 | AT5G31736 |                                                                                                                                                                                                                                                                                                                                                                           |
| 2.15 | 11.01 | 1.1  | 10.45 | 0.00426996 | AT5G32071 |                                                                                                                                                                                                                                                                                                                                                                           |
| 2.15 | 9.51  | 1.1  | 8.96  | 0.00603002 | AT5G35010 |                                                                                                                                                                                                                                                                                                                                                                           |
| 2.14 | 10.38 | 1.1  | 9.83  | 0.0070466  | AT1G37867 |                                                                                                                                                                                                                                                                                                                                                                           |
| 2.14 | 10.87 | 1.09 | 10.32 | 0.00468774 | AT2G10670 |                                                                                                                                                                                                                                                                                                                                                                           |
| 2.14 | 10.03 | 1.1  | 9.48  | 0.01269878 | AT2G14820 | MEL3_NPY2__Phototropic-responsive NPH3 family protein                                                                                                                                                                                                                                                                                                                     |
| 2.14 | 10.26 | 1.09 | 9.71  | 0.01226263 | AT2G29710 | UDP-Glycosyltransferase superfamily protein                                                                                                                                                                                                                                                                                                                               |
| 2.14 | 9.67  | 1.1  | 9.12  | 0.00489929 | AT2G45080 | cycp3;1__cyclin p3;1                                                                                                                                                                                                                                                                                                                                                      |
| 2.14 | 13.1  | 1.1  | 12.55 | 0.00356968 | AT3G04640 | glycine-rich protein                                                                                                                                                                                                                                                                                                                                                      |
| 2.14 | 12.08 | 1.1  | 11.54 | 0.00542693 | AT3G42252 |                                                                                                                                                                                                                                                                                                                                                                           |
| 2.14 | 11.93 | 1.1  | 11.38 | 0.00356968 | AT3G47210 | Plant protein of unknown function (DUF247)                                                                                                                                                                                                                                                                                                                                |
| 2.14 | 14.26 | 1.1  | 13.71 | 0.01714177 | AT3G49110 | ATPCA_ATPRX33_PRX33_PRXCA__peroxidase CA                                                                                                                                                                                                                                                                                                                                  |
| 2.14 | 13.89 | 1.1  | 13.34 | 0.00434623 | AT4G05390 | ATRFNR1_RFNR1__root FNR 1                                                                                                                                                                                                                                                                                                                                                 |
| 2.14 | 9.99  | 1.1  | 9.44  | 0.00294186 | AT4G06625 |                                                                                                                                                                                                                                                                                                                                                                           |
| 2.14 | 8.67  | 1.1  | 8.12  | 0.00318627 | AT4G07620 |                                                                                                                                                                                                                                                                                                                                                                           |
|      |       |      |       |            |           | unknown protein; FUNCTIONS IN: molecular_function unknown; INVOLVED IN: biological_process unknown; LOCATED IN: endomembrane system; EXPRESSED IN: stem, root, leaf; EXPRESSED DURING: LP.06 six leaves visible, LP.04 four leaves visible; Has 30201 Blast hits to 17322 proteins in 780 species: Archae - 12; Bacteria - 1396; Metazoa - 17338; Fungi -                 |
| 2.14 | 10.73 | 1.1  | 10.19 | 0.00470122 | AT4G37295 |                                                                                                                                                                                                                                                                                                                                                                           |

|      |       |      |       |            |           |                                                                                                                                                                                                                                                                                                                                                                                                                                                                                                                                                                                                                                |
|------|-------|------|-------|------------|-----------|--------------------------------------------------------------------------------------------------------------------------------------------------------------------------------------------------------------------------------------------------------------------------------------------------------------------------------------------------------------------------------------------------------------------------------------------------------------------------------------------------------------------------------------------------------------------------------------------------------------------------------|
|      |       |      |       |            |           | 3422; Plants - 5037; Viruses - 0; Other Eukaryotes - 2996 (source: NCBI BLink).                                                                                                                                                                                                                                                                                                                                                                                                                                                                                                                                                |
| 2.14 | 14.04 | 1.1  | 13.49 | 0.0047211  | AT5G10830 | S-adenosyl-L-methionine-dependent methyltransferases superfamily protein                                                                                                                                                                                                                                                                                                                                                                                                                                                                                                                                                       |
| 2.14 | 10.24 | 1.1  | 9.69  | 0.00356968 | AT5G30673 |                                                                                                                                                                                                                                                                                                                                                                                                                                                                                                                                                                                                                                |
| 2.14 | 12.61 | 1.1  | 12.06 | 0.00438643 | AT5G31787 |                                                                                                                                                                                                                                                                                                                                                                                                                                                                                                                                                                                                                                |
| 2.14 | 11.66 | 1.1  | 11.12 | 0.00528978 | AT5G32405 |                                                                                                                                                                                                                                                                                                                                                                                                                                                                                                                                                                                                                                |
| 2.14 | 10.66 | 1.1  | 10.11 | 0.005834   | AT5G35142 |                                                                                                                                                                                                                                                                                                                                                                                                                                                                                                                                                                                                                                |
| 2.14 | 8.67  | 1.1  | 8.12  | 0.02979537 | AT5G57980 | RPB5C__RNA polymerase II fifth largest subunit, C                                                                                                                                                                                                                                                                                                                                                                                                                                                                                                                                                                              |
| 2.14 | 14.3  | 1.09 | 13.75 | 0.00266801 | ATCG00940 |                                                                                                                                                                                                                                                                                                                                                                                                                                                                                                                                                                                                                                |
| 2.13 | 10.17 | 1.09 | 9.62  | 0.02464648 | AT1G14550 | Peroxidase superfamily protein                                                                                                                                                                                                                                                                                                                                                                                                                                                                                                                                                                                                 |
| 2.13 | 14.09 | 1.09 | 13.54 | 0.00394838 | AT1G20510 | OPCL1__OPC-8:0 CoA ligase1 OPCL1__OPC-8:0 CoA ligase1                                                                                                                                                                                                                                                                                                                                                                                                                                                                                                                                                                          |
| 2.13 | 9.32  | 1.09 | 8.77  | 0.01027468 | AT1G41930 |                                                                                                                                                                                                                                                                                                                                                                                                                                                                                                                                                                                                                                |
| 2.13 | 11.61 | 1.09 | 11.06 | 0.0040014  | AT3G32220 |                                                                                                                                                                                                                                                                                                                                                                                                                                                                                                                                                                                                                                |
| 2.13 | 11    | 1.09 | 10.45 | 0.00617912 | AT3G42256 |                                                                                                                                                                                                                                                                                                                                                                                                                                                                                                                                                                                                                                |
| 2.13 | 10.69 | 1.09 | 10.15 | 0.00294186 | AT3G43864 |                                                                                                                                                                                                                                                                                                                                                                                                                                                                                                                                                                                                                                |
| 2.13 | 11.53 | 1.09 | 10.99 | 0.00428228 | AT4G07458 |                                                                                                                                                                                                                                                                                                                                                                                                                                                                                                                                                                                                                                |
| 2.13 | 9.43  | 1.09 | 8.88  | 0.00638451 | AT4G14250 | structural constituent of ribosome                                                                                                                                                                                                                                                                                                                                                                                                                                                                                                                                                                                             |
| 2.13 | 11.61 | 1.09 | 11.07 | 0.00568994 | AT4G31020 | alpha/beta-Hydrolases superfamily protein                                                                                                                                                                                                                                                                                                                                                                                                                                                                                                                                                                                      |
| 2.13 | 10.13 | 1.09 | 9.59  | 0.01315501 | AT5G07040 | RING/U-box superfamily protein                                                                                                                                                                                                                                                                                                                                                                                                                                                                                                                                                                                                 |
| 2.13 | 12.94 | 1.09 | 12.39 | 0.00662165 | ATMG00450 | ORF106B__hypothetical protein                                                                                                                                                                                                                                                                                                                                                                                                                                                                                                                                                                                                  |
| 2.12 | 10.76 | 1.08 | 10.22 | 0.00286412 | AT1G32720 | Cytochrome C oxidase polypeptide VIB family protein                                                                                                                                                                                                                                                                                                                                                                                                                                                                                                                                                                            |
| 2.12 | 10.42 | 1.09 | 9.87  | 0.00666122 | AT1G39750 |                                                                                                                                                                                                                                                                                                                                                                                                                                                                                                                                                                                                                                |
| 2.12 | 10.05 | 1.08 | 9.51  | 0.03670394 | AT1G48510 | Surfeit locus 1 cytochrome c oxidase biogenesis protein                                                                                                                                                                                                                                                                                                                                                                                                                                                                                                                                                                        |
| 2.12 | 12.75 | 1.08 | 12.21 | 0.00614252 | AT2G07749 | Mitovirus RNA-dependent RNA polymerase<br>unknown protein; INVOLVED IN: biological_process unknown; LOCATED IN: mitochondrion;<br>EXPRESSED IN: inflorescence meristem, root, flower; EXPRESSED DURING: petal<br>differentiation and expansion stage; CONTAINS InterPro DOMAIN/s: Protein of unknown<br>function DUF939, bacterial (InterPro:IPR010343); BEST Arabidopsis thaliana protein match is:<br>unknown protein (TAIR:AT3G09450.1); Has 671 Blast hits to 667 proteins in 305 species: Archae<br>- 0; Bacteria - 588; Metazoa - 0; Fungi - 2; Plants - 66; Viruses - 0; Other Eukaryotes - 15 (source:<br>NCBI BLink). |
| 2.12 | 13.48 | 1.08 | 12.94 | 0.00356968 | AT2G28780 |                                                                                                                                                                                                                                                                                                                                                                                                                                                                                                                                                                                                                                |
| 2.12 | 14.89 | 1.08 | 14.34 | 0.00374452 | AT2G38470 | ATWRKY33_WRKY33__WRKY DNA-binding protein 33                                                                                                                                                                                                                                                                                                                                                                                                                                                                                                                                                                                   |
| 2.12 | 14.06 | 1.08 | 13.51 | 0.00296119 | AT3G16720 | ATL2_TL2__TOXICOS EN LEVADURA 2                                                                                                                                                                                                                                                                                                                                                                                                                                                                                                                                                                                                |
| 2.12 | 12.33 | 1.08 | 11.79 | 0.01003984 | AT4G01525 |                                                                                                                                                                                                                                                                                                                                                                                                                                                                                                                                                                                                                                |
| 2.12 | 12.66 | 1.09 | 12.11 | 0.00627621 | AT5G10510 | AIL6_PLT3__AINTEGUMENTA-like 6 AIL6_PLT3__AINTEGUMENTA-like 6                                                                                                                                                                                                                                                                                                                                                                                                                                                                                                                                                                  |
| 2.12 | 12.82 | 1.08 | 12.28 | 0.00546333 | AT5G32312 |                                                                                                                                                                                                                                                                                                                                                                                                                                                                                                                                                                                                                                |
| 2.12 | 10.77 | 1.09 | 10.22 | 0.00617387 | AT5G32750 |                                                                                                                                                                                                                                                                                                                                                                                                                                                                                                                                                                                                                                |

|      |       |      |       |            |           |                                                                                                                                                                                                                                                                                                                                                                                                                                                            |
|------|-------|------|-------|------------|-----------|------------------------------------------------------------------------------------------------------------------------------------------------------------------------------------------------------------------------------------------------------------------------------------------------------------------------------------------------------------------------------------------------------------------------------------------------------------|
| 2.12 | 10.52 | 1.08 | 9.98  | 0.00669899 | AT5G57500 | Galactosyltransferase family protein                                                                                                                                                                                                                                                                                                                                                                                                                       |
| 2.11 | 13.05 | 1.08 | 12.51 | 0.0099573  | AT1G02400 | ATGA2OX4_ATGA2OX6_DTA1_GA2OX6__gibberellin 2-oxidase 6                                                                                                                                                                                                                                                                                                                                                                                                     |
| 2.11 | 10.04 | 1.08 | 9.5   | 0.00518233 | AT1G38350 |                                                                                                                                                                                                                                                                                                                                                                                                                                                            |
| 2.11 | 10.42 | 1.08 | 9.88  | 0.00452251 | AT1G42370 |                                                                                                                                                                                                                                                                                                                                                                                                                                                            |
|      |       |      |       |            |           | unknown protein; LOCATED IN: endomembrane system; Has 30201 Blast hits to 17322 proteins in 780 species: Archae - 12; Bacteria - 1396; Metazoa - 17338; Fungi - 3422; Plants - 5037; Viruses - 0; Other Eukaryotes - 2996 (source: NCBI BLink).                                                                                                                                                                                                            |
| 2.11 | 12.73 | 1.08 | 12.19 | 0.00576543 | AT2G07830 | Viruses - 0; Other Eukaryotes - 2996 (source: NCBI BLink).                                                                                                                                                                                                                                                                                                                                                                                                 |
| 2.11 | 12.45 | 1.08 | 11.91 | 0.00999489 | AT3G04320 | Kunitz family trypsin and protease inhibitor protein                                                                                                                                                                                                                                                                                                                                                                                                       |
| 2.11 | 13.98 | 1.08 | 13.44 | 0.00356968 | AT3G18690 | MKS1__MAP kinase substrate 1                                                                                                                                                                                                                                                                                                                                                                                                                               |
| 2.11 | 9.56  | 1.08 | 9.02  | 0.00229082 | AT3G33100 |                                                                                                                                                                                                                                                                                                                                                                                                                                                            |
| 2.11 | 11.27 | 1.08 | 10.73 | 0.00422741 | AT4G07942 |                                                                                                                                                                                                                                                                                                                                                                                                                                                            |
| 2.11 | 11.35 | 1.07 | 10.81 | 0.00459015 | AT5G08360 | Protein of unknown function (DUF789)                                                                                                                                                                                                                                                                                                                                                                                                                       |
| 2.11 | 12.67 | 1.08 | 12.13 | 0.0165731  | AT5G11920 | AtcwINV6_cwINV6__6-&1-fructan exohydrolase                                                                                                                                                                                                                                                                                                                                                                                                                 |
| 2.11 | 10.99 | 1.07 | 10.45 | 0.00605413 | AT5G32197 |                                                                                                                                                                                                                                                                                                                                                                                                                                                            |
| 2.11 | 10.54 | 1.08 | 10.01 | 0.00554683 | AT5G32345 |                                                                                                                                                                                                                                                                                                                                                                                                                                                            |
| 2.11 | 8.62  | 1.08 | 8.08  | 0.00640968 | AT5G33237 |                                                                                                                                                                                                                                                                                                                                                                                                                                                            |
| 2.11 | 9.37  | 1.08 | 8.83  | 0.00760062 | AT5G33427 |                                                                                                                                                                                                                                                                                                                                                                                                                                                            |
| 2.11 | 9.71  | 1.08 | 9.17  | 0.04650419 | AT5G44620 | CYP706A3__cytochrome P450, family 706, subfamily A, polypeptide 3                                                                                                                                                                                                                                                                                                                                                                                          |
| 2.11 | 14.98 | 1.08 | 14.44 | 0.00593185 | ATCG00850 |                                                                                                                                                                                                                                                                                                                                                                                                                                                            |
| 2.11 | 12.62 | 1.08 | 12.08 | 0.00483365 | ATMG00513 | NAD5_NAD5.1_NAD5A__NADH dehydrogenase 5A                                                                                                                                                                                                                                                                                                                                                                                                                   |
| 2.1  | 9.07  | 1.07 | 8.53  | 0.00784132 | AT1G32970 | Subtilisin-like serine endopeptidase family protein                                                                                                                                                                                                                                                                                                                                                                                                        |
| 2.1  | 10.22 | 1.07 | 9.69  | 0.0100502  | AT1G38450 |                                                                                                                                                                                                                                                                                                                                                                                                                                                            |
| 2.1  | 10.84 | 1.07 | 10.3  | 0.00490771 | AT1G42375 |                                                                                                                                                                                                                                                                                                                                                                                                                                                            |
| 2.1  | 13.94 | 1.07 | 13.4  | 0.02665442 | AT1G53885 | Protein of unknown function (DUF581)                                                                                                                                                                                                                                                                                                                                                                                                                       |
| 2.1  | 10.41 | 1.07 | 9.88  | 0.00565467 | AT2G14960 | GH3.1__Auxin-responsive GH3 family protein                                                                                                                                                                                                                                                                                                                                                                                                                 |
|      |       |      |       |            |           | unknown protein; FUNCTIONS IN: molecular_function unknown; INVOLVED IN: N-terminal protein myristoylation; LOCATED IN: cellular_component unknown; BEST Arabidopsis thaliana protein match is: unknown protein (TAIR:AT5G17350.1); Has 137 Blast hits to 137 proteins in 11 species: Archae - 0; Bacteria - 0; Metazoa - 0; Fungi - 0; Plants - 137; Viruses - 0; Other Eukaryotes - 0 (source: NCBI BLink).                                               |
| 2.1  | 11.27 | 1.07 | 10.74 | 0.00309366 | AT3G03280 | unknown protein; FUNCTIONS IN: molecular_function unknown; INVOLVED IN: biological_process unknown; LOCATED IN: chloroplast; EXPRESSED IN: 24 plant structures; EXPRESSED DURING: 15 growth stages; BEST Arabidopsis thaliana protein match is: unknown protein (TAIR:AT1G52720.1); Has 61 Blast hits to 61 proteins in 13 species: Archae - 0; Bacteria - 0; Metazoa - 0; Fungi - 0; Plants - 61; Viruses - 0; Other Eukaryotes - 0 (source: NCBI BLink). |
| 2.1  | 14.13 | 1.07 | 13.59 | 0.00459015 | AT3G15630 |                                                                                                                                                                                                                                                                                                                                                                                                                                                            |
| 2.1  | 10.19 | 1.07 | 9.65  | 0.00309366 | AT3G30645 |                                                                                                                                                                                                                                                                                                                                                                                                                                                            |

|      |       |      |       |            |           |                                                                                                                                                                                                                                                                                                                                                                                                                                                                                                                                                                                                                                                 |
|------|-------|------|-------|------------|-----------|-------------------------------------------------------------------------------------------------------------------------------------------------------------------------------------------------------------------------------------------------------------------------------------------------------------------------------------------------------------------------------------------------------------------------------------------------------------------------------------------------------------------------------------------------------------------------------------------------------------------------------------------------|
| 2.1  | 11.3  | 1.07 | 10.77 | 0.0048453  | AT3G30700 |                                                                                                                                                                                                                                                                                                                                                                                                                                                                                                                                                                                                                                                 |
| 2.1  | 10.28 | 1.07 | 9.74  | 0.00731852 | AT3G42445 |                                                                                                                                                                                                                                                                                                                                                                                                                                                                                                                                                                                                                                                 |
| 2.1  | 11.43 | 1.07 | 10.9  | 0.00650093 | AT3G43862 |                                                                                                                                                                                                                                                                                                                                                                                                                                                                                                                                                                                                                                                 |
| 2.1  | 11.75 | 1.07 | 11.21 | 0.00420934 | AT4G07485 |                                                                                                                                                                                                                                                                                                                                                                                                                                                                                                                                                                                                                                                 |
| 2.1  | 12.97 | 1.07 | 12.44 | 0.00894842 | AT4G19880 | Glutathione S-transferase family protein                                                                                                                                                                                                                                                                                                                                                                                                                                                                                                                                                                                                        |
| 2.1  | 11.64 | 1.07 | 11.1  | 0.01467773 | AT4G33985 | Protein of unknown function (DUF1685)<br>unknown protein; FUNCTIONS IN: molecular_function unknown; INVOLVED IN: biological_process unknown; LOCATED IN: mitochondrion; EXPRESSED IN: 22 plant structures; EXPRESSED DURING: 13 growth stages; BEST Arabidopsis thaliana protein match is: unknown protein (TAIR:AT2G18210.1); Has 50 Blast hits to 50 proteins in 7 species: Archae - 0; Bacteria - 0; Metazoa - 0; Fungi - 0; Plants - 50; Viruses - 0; Other Eukaryotes - 0 (source: NCBI BLink).                                                                                                                                            |
| 2.1  | 14.67 | 1.07 | 14.13 | 0.00356968 | AT4G36500 |                                                                                                                                                                                                                                                                                                                                                                                                                                                                                                                                                                                                                                                 |
| 2.1  | 13.76 | 1.07 | 13.22 | 0.00886775 | AT5G12940 | Leucine-rich repeat (LRR) family protein<br>unknown protein; FUNCTIONS IN: molecular_function unknown; INVOLVED IN: biological_process unknown; LOCATED IN: mitochondrion; EXPRESSED IN: 10 plant structures; EXPRESSED DURING: LP.04 four leaves visible, LP.10 ten leaves visible, petal differentiation and expansion stage, LP.08 eight leaves visible, LP.12 twelve leaves visible; BEST Arabidopsis thaliana protein match is: unknown protein (TAIR:AT4G02170.1); Has 64 Blast hits to 64 proteins in 13 species: Archae - 0; Bacteria - 0; Metazoa - 0; Fungi - 0; Plants - 64; Viruses - 0; Other Eukaryotes - 0 (source: NCBI BLink). |
| 2.1  | 10.73 | 1.07 | 10.19 | 0.01033221 | AT5G38700 |                                                                                                                                                                                                                                                                                                                                                                                                                                                                                                                                                                                                                                                 |
| 2.1  | 10.59 | 1.07 | 10.06 | 0.02917437 | AT5G44417 |                                                                                                                                                                                                                                                                                                                                                                                                                                                                                                                                                                                                                                                 |
| 2.1  | 8.15  | 1.07 | 7.61  | 0.00394474 | AT5G57126 |                                                                                                                                                                                                                                                                                                                                                                                                                                                                                                                                                                                                                                                 |
| 2.09 | 11.04 | 1.06 | 10.51 | 0.00946772 | AT1G42365 |                                                                                                                                                                                                                                                                                                                                                                                                                                                                                                                                                                                                                                                 |
| 2.09 | 11.21 | 1.07 | 10.68 | 0.0052529  | AT1G72210 | basic helix-loop-helix (bHLH) DNA-binding superfamily protein                                                                                                                                                                                                                                                                                                                                                                                                                                                                                                                                                                                   |
| 2.09 | 12.27 | 1.06 | 11.74 | 0.0385492  | AT1G74500 | ATBS1_BS1_TMO7__activation-tagged BRI1(brassinosteroid-insensitive 1)-suppressor 1                                                                                                                                                                                                                                                                                                                                                                                                                                                                                                                                                              |
| 2.09 | 14.02 | 1.06 | 13.49 | 0.01024343 | AT2G22500 | ATPUMP5_DIC1_UCP5__uncoupling protein 5                                                                                                                                                                                                                                                                                                                                                                                                                                                                                                                                                                                                         |
| 2.09 | 14.34 | 1.06 | 13.81 | 0.00434623 | AT2G26530 | AR781__Protein of unknown function (DUF1645)                                                                                                                                                                                                                                                                                                                                                                                                                                                                                                                                                                                                    |
| 2.09 | 13.36 | 1.06 | 12.83 | 0.00611309 | AT2G39350 | ABCG1__ABC-2 type transporter family protein<br>unknown protein; Has 1 Blast hits to 1 proteins in 1 species: Archae - 0; Bacteria - 0; Metazoa - 0; Fungi - 0; Plants - 1; Viruses - 0; Other Eukaryotes - 0 (source: NCBI BLink).                                                                                                                                                                                                                                                                                                                                                                                                             |
| 2.09 | 9.55  | 1.07 | 9.02  | 0.01213203 | AT3G42990 |                                                                                                                                                                                                                                                                                                                                                                                                                                                                                                                                                                                                                                                 |
| 2.09 | 12.76 | 1.06 | 12.23 | 0.00904592 | AT3G44326 | F-box family protein                                                                                                                                                                                                                                                                                                                                                                                                                                                                                                                                                                                                                            |
| 2.09 | 11.1  | 1.06 | 10.57 | 0.01388666 | AT3G62210 | EDA32__Putative endonuclease or glycosyl hydrolase                                                                                                                                                                                                                                                                                                                                                                                                                                                                                                                                                                                              |
| 2.09 | 11.41 | 1.06 | 10.88 | 0.00563172 | AT4G07941 |                                                                                                                                                                                                                                                                                                                                                                                                                                                                                                                                                                                                                                                 |
| 2.09 | 9.81  | 1.07 | 9.28  | 0.00855569 | AT4G39320 | microtubule-associated protein-related                                                                                                                                                                                                                                                                                                                                                                                                                                                                                                                                                                                                          |
| 2.09 | 8.36  | 1.06 | 7.83  | 0.00294186 | AT5G28165 |                                                                                                                                                                                                                                                                                                                                                                                                                                                                                                                                                                                                                                                 |
| 2.09 | 9.3   | 1.06 | 8.77  | 0.00420934 | AT5G31668 |                                                                                                                                                                                                                                                                                                                                                                                                                                                                                                                                                                                                                                                 |

|      |       |      |       |            |           |                                                                                  |
|------|-------|------|-------|------------|-----------|----------------------------------------------------------------------------------|
| 2.09 | 12.89 | 1.06 | 12.36 | 0.00475865 | AT5G32161 |                                                                                  |
| 2.08 | 10.85 | 1.06 | 10.32 | 0.01297327 | AT1G20510 | OPCL1__OPC-8:0 CoA ligase1 OPCL1__OPC-8:0 CoA ligase1                            |
| 2.08 | 8.31  | 1.05 | 7.78  | 0.00512277 | AT1G37405 |                                                                                  |
| 2.08 | 10.22 | 1.06 | 9.69  | 0.00479295 | AT1G42360 |                                                                                  |
| 2.08 | 9.91  | 1.06 | 9.38  | 0.00514085 | AT2G06150 |                                                                                  |
| 2.08 | 13.68 | 1.05 | 13.15 | 0.00581482 | AT2G07733 |                                                                                  |
| 2.08 | 10.68 | 1.06 | 10.15 | 0.00459015 | AT2G13010 |                                                                                  |
| 2.08 | 10.85 | 1.06 | 10.32 | 0.02184334 | AT3G14540 | Terpenoid cyclases/Protein prenyltransferases superfamily protein                |
| 2.08 | 8.42  | 1.06 | 7.89  | 0.01417286 | AT3G31390 |                                                                                  |
| 2.08 | 9.46  | 1.05 | 8.93  | 0.00788305 | AT4G03770 |                                                                                  |
| 2.08 | 10.78 | 1.06 | 10.25 | 0.01259768 | AT4G05591 |                                                                                  |
| 2.08 | 8.45  | 1.06 | 7.92  | 0.01297327 | AT4G06628 |                                                                                  |
| 2.08 | 11.73 | 1.06 | 11.21 | 0.00646462 | AT4G38400 | ATEXLA2_ATEXPL2_ATHEXP BETA 2.2_EXLA2_EXPL2__expansin-like A2                    |
| 2.08 | 9.32  | 1.06 | 8.79  | 0.00356968 | AT5G05365 | Heavy metal transport/detoxification superfamily protein                         |
| 2.08 | 11.5  | 1.06 | 10.97 | 0.0064896  | AT5G32306 |                                                                                  |
| 2.08 | 11.39 | 1.06 | 10.86 | 0.00924191 | AT5G32475 |                                                                                  |
| 2.08 | 11.85 | 1.06 | 11.33 | 0.00660299 | AT5G32486 |                                                                                  |
| 2.08 | 10.77 | 1.06 | 10.24 | 0.00834013 | AT5G33383 |                                                                                  |
| 2.08 | 11.38 | 1.06 | 10.86 | 0.00981356 | AT5G53290 | CRF3__cytokinin response factor 3                                                |
| 2.07 | 10.79 | 1.05 | 10.27 | 0.00518233 | AT1G08090 | ACH1_ATNRT2.1_ATNRT2:1_LIN1_NRT2_NRT2.1_NRT2:1_NRT2:1AT__nitrate transporter 2:1 |
| 2.07 | 11.13 | 1.05 | 10.61 | 0.00548055 | AT1G36520 |                                                                                  |
| 2.07 | 9.55  | 1.05 | 9.03  | 0.00755929 | AT1G39910 |                                                                                  |
| 2.07 | 9.14  | 1.05 | 8.62  | 0.00649867 | AT2G06965 |                                                                                  |
| 2.07 | 11    | 1.05 | 10.48 | 0.0039413  | AT2G09187 |                                                                                  |
| 2.07 | 8.95  | 1.05 | 8.43  | 0.00738846 | AT2G13020 |                                                                                  |
| 2.07 | 10.53 | 1.05 | 10.01 | 0.01476349 | AT2G32140 | transmembrane receptors                                                          |
| 2.07 | 9.81  | 1.05 | 9.29  | 0.0047211  | AT3G42750 |                                                                                  |
| 2.07 | 12.98 | 1.05 | 12.45 | 0.02633943 | AT3G60140 | BGLU30_DIN2_SRG2__Glycosyl hydrolase superfamily protein                         |
| 2.07 | 9.57  | 1.05 | 9.05  | 0.03677134 | AT4G11480 | CRK32__cysteine-rich RLK (RECEPTOR-like protein kinase) 32                       |
| 2.07 | 11.56 | 1.05 | 11.04 | 0.03069242 | AT4G22235 | Arabidopsis defensin-like protein                                                |
| 2.07 | 7.69  | 1.05 | 7.16  | 0.00447862 | AT4G23515 | Toll-Interleukin-Resistance (TIR) domain family protein                          |
| 2.07 | 13.83 | 1.05 | 13.31 | 0.00850967 | AT4G30280 | ATXTH18_XTH18__xyloglucan endotransglucosylase/hydrolase 18                      |
| 2.07 | 13.44 | 1.05 | 12.92 | 0.01311534 | AT5G18470 | Curculin-like (mannose-binding) lectin family protein                            |
| 2.07 | 13.53 | 1.05 | 13    | 0.01693252 | AT5G19410 | ABCG23__ABC-2 type transporter family protein                                    |
| 2.07 | 8.31  | 1.05 | 7.79  | 0.00229082 | AT5G29053 |                                                                                  |



|      |       |      |       |            |           |                                                                                                                                                                                                                                                                                                                                                                                                                                                                                                               |
|------|-------|------|-------|------------|-----------|---------------------------------------------------------------------------------------------------------------------------------------------------------------------------------------------------------------------------------------------------------------------------------------------------------------------------------------------------------------------------------------------------------------------------------------------------------------------------------------------------------------|
| 2.07 | 8.8   | 1.05 | 8.28  | 0.02163718 | AT5G55650 | unknown protein; Has 1807 Blast hits to 1807 proteins in 277 species: Archae - 0; Bacteria - 0; Metazoa - 736; Fungi - 347; Plants - 385; Viruses - 0; Other Eukaryotes - 339 (source: NCBI BLink).                                                                                                                                                                                                                                                                                                           |
| 2.07 | 14.99 | 1.05 | 14.46 | 0.00288203 | AT5G59550 | zinc finger (C3HC4-type RING finger) family protein                                                                                                                                                                                                                                                                                                                                                                                                                                                           |
| 2.07 | 10.62 | 1.05 | 10.09 | 0.00610609 | AT5G60310 | Concanavalin A-like lectin protein kinase family protein                                                                                                                                                                                                                                                                                                                                                                                                                                                      |
| 2.07 | 14.86 | 1.05 | 14.34 | 0.00528978 | ATCG00330 | RPS14__chloroplast ribosomal protein S14                                                                                                                                                                                                                                                                                                                                                                                                                                                                      |
| 2.06 | 13.7  | 1.05 | 13.18 | 0.00306866 | AT1G06620 | 2-oxoglutarate (2OG) and Fe(II)-dependent oxygenase superfamily protein                                                                                                                                                                                                                                                                                                                                                                                                                                       |
| 2.06 | 10.31 | 1.05 | 9.79  | 0.00753143 | AT1G36795 |                                                                                                                                                                                                                                                                                                                                                                                                                                                                                                               |
| 2.06 | 13.66 | 1.04 | 13.14 | 0.00981356 | AT1G80240 | Protein of unknown function, DUF642<br>unknown protein; FUNCTIONS IN: molecular_function unknown; INVOLVED IN: biological_process unknown; LOCATED IN: endomembrane system; EXPRESSED IN: stem, sperm cell, root, stamen; EXPRESSED DURING: 4 anthesis; BEST Arabidopsis thaliana protein match is: unknown protein (TAIR:AT4G37290.1); Has 36 Blast hits to 35 proteins in 6 species: Archae - 0; Bacteria - 0; Metazoa - 0; Fungi - 0; Plants - 36; Viruses - 0; Other Eukaryotes - 0 (source: NCBI BLink). |
| 2.06 | 10.44 | 1.05 | 9.91  | 0.00489929 | AT2G23270 |                                                                                                                                                                                                                                                                                                                                                                                                                                                                                                               |
| 2.06 | 9.46  | 1.04 | 8.94  | 0.00294186 | AT3G32116 |                                                                                                                                                                                                                                                                                                                                                                                                                                                                                                               |
| 2.06 | 13.75 | 1.04 | 13.23 | 0.01246168 | AT3G45970 | ATEXLA1_ATEXPL1_ATHEXP BETA 2.1_EXLA1_EXPL1__expansin-like A1                                                                                                                                                                                                                                                                                                                                                                                                                                                 |
| 2.06 | 13.4  | 1.04 | 12.88 | 0.00751067 | AT3G51450 | Calcium-dependent phosphotriesterase superfamily protein                                                                                                                                                                                                                                                                                                                                                                                                                                                      |
| 2.06 | 10.92 | 1.04 | 10.4  | 0.00373973 | AT4G06626 |                                                                                                                                                                                                                                                                                                                                                                                                                                                                                                               |
| 2.06 | 11.36 | 1.04 | 10.83 | 0.00744327 | AT4G06664 |                                                                                                                                                                                                                                                                                                                                                                                                                                                                                                               |
| 2.06 | 11.88 | 1.04 | 11.35 | 0.00417546 | AT4G06704 |                                                                                                                                                                                                                                                                                                                                                                                                                                                                                                               |
| 2.06 | 11.83 | 1.04 | 11.31 | 0.01349985 | AT5G14020 | Endosomal targeting BRO1-like domain-containing protein                                                                                                                                                                                                                                                                                                                                                                                                                                                       |
| 2.06 | 11.57 | 1.04 | 11.05 | 0.00473458 | AT5G33150 |                                                                                                                                                                                                                                                                                                                                                                                                                                                                                                               |
| 2.06 | 9.88  | 1.04 | 9.36  | 0.00787903 | AT5G36070 |                                                                                                                                                                                                                                                                                                                                                                                                                                                                                                               |
| 2.06 | 12.3  | 1.04 | 11.78 | 0.02021372 | AT5G47530 | Auxin-responsive family protein                                                                                                                                                                                                                                                                                                                                                                                                                                                                               |
| 2.06 | 13.73 | 1.04 | 13.21 | 0.00592108 | AT5G48070 | ATXTH20_XTH20__xyloglucan endotransglucosylase/hydrolase 20                                                                                                                                                                                                                                                                                                                                                                                                                                                   |
| 2.06 | 12.55 | 1.05 | 12.03 | 0.02183083 | AT5G52320 | CYP96A4__cytochrome P450, family 96, subfamily A, polypeptide 4                                                                                                                                                                                                                                                                                                                                                                                                                                               |
| 2.06 | 14.93 | 1.04 | 14.41 | 0.00487538 | ATCG00890 | NDHB.1__NADH-Ubiquinone/plastoquinone (complex I) protein                                                                                                                                                                                                                                                                                                                                                                                                                                                     |
| 2.05 | 10.63 | 1.03 | 10.11 | 0.00630748 | AT1G22280 | PAPP2C__phytochrome-associated protein phosphatase type 2C                                                                                                                                                                                                                                                                                                                                                                                                                                                    |
| 2.05 | 10.01 | 1.03 | 9.49  | 0.00480388 | AT1G36460 |                                                                                                                                                                                                                                                                                                                                                                                                                                                                                                               |
| 2.05 | 10.89 | 1.03 | 10.37 | 0.00453585 | AT1G40117 |                                                                                                                                                                                                                                                                                                                                                                                                                                                                                                               |
| 2.05 | 9.47  | 1.04 | 8.95  | 0.00315341 | AT1G41630 |                                                                                                                                                                                                                                                                                                                                                                                                                                                                                                               |
| 2.05 | 11.37 | 1.04 | 10.86 | 0.00794236 | AT1G42050 |                                                                                                                                                                                                                                                                                                                                                                                                                                                                                                               |
| 2.05 | 12.35 | 1.03 | 11.83 | 0.00788652 | AT1G59860 | HSP20-like chaperones superfamily protein                                                                                                                                                                                                                                                                                                                                                                                                                                                                     |
| 2.05 | 10.48 | 1.04 | 9.96  | 0.00540858 | AT2G09950 |                                                                                                                                                                                                                                                                                                                                                                                                                                                                                                               |
| 2.05 | 10.93 | 1.04 | 10.42 | 0.01254852 | AT2G10140 |                                                                                                                                                                                                                                                                                                                                                                                                                                                                                                               |

|      |       |      |       |            |           |                                                                                                                                                       |
|------|-------|------|-------|------------|-----------|-------------------------------------------------------------------------------------------------------------------------------------------------------|
| 2.05 | 10.16 | 1.04 | 9.64  | 0.00911009 | AT2G48080 | oxidoreductase, 2OG-Fe(II) oxygenase family protein                                                                                                   |
| 2.05 | 11.91 | 1.04 | 11.39 | 0.00457941 | AT3G30690 |                                                                                                                                                       |
| 2.05 | 12.1  | 1.03 | 11.59 | 0.00459015 | AT3G32210 |                                                                                                                                                       |
| 2.05 | 7.84  | 1.03 | 7.33  | 0.01829146 | AT4G07498 |                                                                                                                                                       |
| 2.05 | 12.66 | 1.03 | 12.14 | 0.00563172 | AT4G08138 |                                                                                                                                                       |
| 2.05 | 12.98 | 1.04 | 12.46 | 0.00646462 | AT5G10510 | AIL6_PLT3__AINTEGUMENTA-like 6 AIL6_PLT3__AINTEGUMENTA-like 6                                                                                         |
| 2.05 | 11.26 | 1.03 | 10.74 | 0.01004503 | AT5G12880 | proline-rich family protein                                                                                                                           |
| 2.05 | 10.58 | 1.03 | 10.06 | 0.00266801 | AT5G32215 |                                                                                                                                                       |
| 2.05 | 11.17 | 1.04 | 10.65 | 0.00756439 | AT5G32420 |                                                                                                                                                       |
| 2.05 | 10.28 | 1.04 | 9.76  | 0.00791298 | AT5G33252 |                                                                                                                                                       |
| 2.05 | 9.55  | 1.04 | 9.03  | 0.00677003 | AT5G35000 |                                                                                                                                                       |
| 2.05 | 14.92 | 1.04 | 14.4  | 0.00461339 | ATCG00870 | ORF77.1__Protein precursor Ycf15, putative, chloroplast                                                                                               |
| 2.04 | 14.36 | 1.03 | 13.84 | 0.00426996 | AT1G13300 | HRS1__myb-like transcription factor family protein                                                                                                    |
| 2.04 | 11.44 | 1.03 | 10.93 | 0.0049944  | AT1G17345 | SAUR-like auxin-responsive protein family                                                                                                             |
| 2.04 | 10.69 | 1.03 | 10.18 | 0.00546655 | AT1G50850 |                                                                                                                                                       |
| 2.04 | 13.29 | 1.03 | 12.78 | 0.00422741 | AT2G07703 |                                                                                                                                                       |
| 2.04 | 10.72 | 1.03 | 10.21 | 0.01112779 | AT2G12300 |                                                                                                                                                       |
| 2.04 | 10.34 | 1.03 | 9.83  | 0.00458514 | AT2G14180 |                                                                                                                                                       |
| 2.04 | 12.31 | 1.03 | 11.8  | 0.00479923 | AT2G14650 |                                                                                                                                                       |
| 2.04 | 13.75 | 1.03 | 13.23 | 0.00309366 | AT2G28080 | UDP-Glycosyltransferase superfamily protein                                                                                                           |
| 2.04 | 11.76 | 1.03 | 11.24 | 0.01834038 | AT2G34020 | Calcium-binding EF-hand family protein                                                                                                                |
| 2.04 | 12.65 | 1.03 | 12.14 | 0.00548785 | AT4G06507 |                                                                                                                                                       |
| 2.04 | 9.73  | 1.03 | 9.21  | 0.00664438 | AT4G06543 |                                                                                                                                                       |
| 2.04 | 14.38 | 1.03 | 13.87 | 0.00742793 | AT4G09030 | AGP10_ATAGP10__arabinogalactan protein 10                                                                                                             |
| 2.04 | 11.62 | 1.03 | 11.11 | 0.00508871 | AT5G10300 | AtHNL_ATMES5_HNL_MES5__methyl esterase 5                                                                                                              |
|      |       |      |       |            |           | JAS1_JAZ10_TIFY9__jasmonate-zim-domain protein 10 JAS1_JAZ10_TIFY9__jasmonate-zim-domain protein 10 JAS1_JAZ10_TIFY9__jasmonate-zim-domain protein 10 |
| 2.04 | 7.48  | 1.03 | 6.96  | 0.0287518  | AT5G13220 | JAS1_JAZ10_TIFY9__jasmonate-zim-domain protein 10                                                                                                     |
| 2.04 | 12.43 | 1.03 | 11.91 | 0.00494369 | AT5G32143 |                                                                                                                                                       |
| 2.04 | 11.63 | 1.03 | 11.12 | 0.00341207 | AT5G32726 |                                                                                                                                                       |
| 2.04 | 11.48 | 1.03 | 10.96 | 0.006315   | AT5G35940 | Mannose-binding lectin superfamily protein                                                                                                            |
| 2.04 | 9.68  | 1.03 | 9.16  | 0.003464   | AT5G45082 |                                                                                                                                                       |
| 2.04 | 9.39  | 1.03 | 8.88  | 0.00470122 | AT5G66050 | Wound-responsive family protein                                                                                                                       |
| 2.03 | 10.33 | 1.02 | 9.82  | 0.00830701 | AT1G42300 |                                                                                                                                                       |
| 2.03 | 14.31 | 1.02 | 13.8  | 0.00709457 | AT1G52070 | Mannose-binding lectin superfamily protein                                                                                                            |
| 2.03 | 8.34  | 1.02 | 7.83  | 0.01706333 | AT1G75020 | LPAT4__lysophosphatidyl acyltransferase 4                                                                                                             |

|      |       |      |       |            |           |                                                                                                                                                                                                                                             |
|------|-------|------|-------|------------|-----------|---------------------------------------------------------------------------------------------------------------------------------------------------------------------------------------------------------------------------------------------|
| 2.03 | 10.55 | 1.02 | 10.04 | 0.00467998 | AT2G01024 |                                                                                                                                                                                                                                             |
| 2.03 | 10.12 | 1.02 | 9.6   | 0.00372592 | AT2G01037 |                                                                                                                                                                                                                                             |
| 2.03 | 12.05 | 1.02 | 11.54 | 0.00597811 | AT2G09953 |                                                                                                                                                                                                                                             |
| 2.03 | 12.78 | 1.02 | 12.27 | 0.00449194 | AT2G12750 |                                                                                                                                                                                                                                             |
| 2.03 | 10.44 | 1.02 | 9.92  | 0.00508871 | AT2G13390 |                                                                                                                                                                                                                                             |
| 2.03 | 13.55 | 1.02 | 13.04 | 0.02585389 | AT2G36690 | 2-oxoglutarate (2OG) and Fe(II)-dependent oxygenase superfamily protein                                                                                                                                                                     |
| 2.03 | 13.5  | 1.02 | 12.99 | 0.00603002 | AT3G49570 | LSU3__response to low sulfur 3                                                                                                                                                                                                              |
| 2.03 | 10.92 | 1.02 | 10.41 | 0.00868459 | AT4G06484 |                                                                                                                                                                                                                                             |
| 2.03 | 14.09 | 1.02 | 13.58 | 0.01907535 | AT4G08770 | Prx37__Peroxidase superfamily protein                                                                                                                                                                                                       |
| 2.03 | 8.49  | 1.02 | 7.98  | 0.00294186 | AT4G18360 | Aldolase-type TIM barrel family protein                                                                                                                                                                                                     |
| 2.03 | 14.2  | 1.02 | 13.68 | 0.0063438  | AT4G21410 | CRK29__cysteine-rich RLK (RECEPTOR-like protein kinase) 29                                                                                                                                                                                  |
| 2.03 | 10.96 | 1.02 | 10.45 | 0.00397758 | AT5G31804 |                                                                                                                                                                                                                                             |
| 2.03 | 10.45 | 1.02 | 9.94  | 0.00470122 | AT5G32228 |                                                                                                                                                                                                                                             |
| 2.03 | 10.23 | 1.02 | 9.72  | 0.00601931 | AT5G32423 |                                                                                                                                                                                                                                             |
| 2.03 | 8.28  | 1.02 | 7.76  | 0.00944571 | AT5G32598 |                                                                                                                                                                                                                                             |
| 2.03 | 8.54  | 1.02 | 8.03  | 0.00356968 | AT5G34845 |                                                                                                                                                                                                                                             |
| 2.03 | 10.4  | 1.02 | 9.89  | 0.02767043 | AT5G58750 | NAD(P)-binding Rossmann-fold superfamily protein                                                                                                                                                                                            |
| 2.03 | 12.89 | 1.02 | 12.38 | 0.01509063 | AT5G64870 | SPFH/Band 7/PHB domain-containing membrane-associated protein family                                                                                                                                                                        |
| 2.03 | 13.03 | 1.02 | 12.52 | 0.01239597 | ATMG00680 | ORF122C__hypothetical protein<br>unknown protein; Has 4478 Blast hits to 355 proteins in 82 species: Archae - 0; Bacteria - 29;<br>Metazoa - 379; Fungi - 125; Plants - 120; Viruses - 25; Other Eukaryotes - 3800 (source: NCBI<br>BLink). |
| 2.02 | 10.21 | 1.02 | 9.7   | 0.01091381 | AT1G06930 |                                                                                                                                                                                                                                             |
| 2.02 | 13.05 | 1.01 | 12.54 | 0.00356968 | AT1G37015 |                                                                                                                                                                                                                                             |
| 2.02 | 11.45 | 1.01 | 10.94 | 0.00962279 | AT1G42140 |                                                                                                                                                                                                                                             |
| 2.02 | 12.52 | 1.01 | 12.02 | 0.00922151 | AT1G55940 | CYP708A1__cytochrome P450, family 708, subfamily A, polypeptide 1                                                                                                                                                                           |
| 2.02 | 14.85 | 1.01 | 14.34 | 0.00294186 | AT2G06050 | AtOPR3_DDE1_OPR3__oxophytodienoate-reductase 3                                                                                                                                                                                              |
| 2.02 | 10.98 | 1.01 | 10.47 | 0.00508871 | AT2G09870 |                                                                                                                                                                                                                                             |
| 2.02 | 10.68 | 1.02 | 10.17 | 0.00528978 | AT2G10780 |                                                                                                                                                                                                                                             |
| 2.02 | 11.75 | 1.01 | 11.24 | 0.01156551 | AT2G30340 | LBD13__LOB domain-containing protein 13                                                                                                                                                                                                     |
| 2.02 | 7.76  | 1.01 | 7.26  | 0.00581265 | AT3G23725 |                                                                                                                                                                                                                                             |
| 2.02 | 10.44 | 1.02 | 9.94  | 0.00678457 | AT3G24370 |                                                                                                                                                                                                                                             |
| 2.02 | 10.24 | 1.02 | 9.74  | 0.00887205 | AT3G32010 |                                                                                                                                                                                                                                             |
| 2.02 | 9.93  | 1.01 | 9.43  | 0.00635402 | AT3G32899 |                                                                                                                                                                                                                                             |
| 2.02 | 11.35 | 1.02 | 10.84 | 0.00893397 | AT3G33085 |                                                                                                                                                                                                                                             |
| 2.02 | 10.58 | 1.01 | 10.07 | 0.00449194 | AT3G42624 |                                                                                                                                                                                                                                             |
| 2.02 | 10.19 | 1.01 | 9.69  | 0.0049944  | AT4G06562 |                                                                                                                                                                                                                                             |

|       |       |       |       |            |           |                                                                                                                                                                                                                                                                                                                                                                                                                              |
|-------|-------|-------|-------|------------|-----------|------------------------------------------------------------------------------------------------------------------------------------------------------------------------------------------------------------------------------------------------------------------------------------------------------------------------------------------------------------------------------------------------------------------------------|
| 2.02  | 10.09 | 1.02  | 9.58  | 0.00709862 | AT4G06736 |                                                                                                                                                                                                                                                                                                                                                                                                                              |
| 2.02  | 11.06 | 1.02  | 10.55 | 0.00554683 | AT4G08050 |                                                                                                                                                                                                                                                                                                                                                                                                                              |
| 2.02  | 9.38  | 1.01  | 8.88  | 0.0059467  | AT4G26380 | Cysteine/Histidine-rich C1 domain family protein<br>unknown protein; FUNCTIONS IN: molecular_function unknown; INVOLVED IN:<br>biological_process unknown; LOCATED IN: endomembrane system; EXPRESSED IN: 10 plant<br>structures; EXPRESSED DURING: LP.04 four leaves visible, 4 anthesis, petal differentiation and<br>expansion stage; Has 8 Blast hits to 8 proteins in 3 species: Archae - 0; Bacteria - 0; Metazoa - 0; |
| 2.02  | 10.86 | 1.01  | 10.35 | 0.02896469 | AT4G28460 | Fungi - 0; Plants - 8; Viruses - 0; Other Eukaryotes - 0 (source: NCBI BLink).                                                                                                                                                                                                                                                                                                                                               |
| 2.02  | 10.3  | 1.01  | 9.8   | 0.0029534  | AT4G34460 | AGB1_ATAGB1_ELK4__GTP binding protein beta 1                                                                                                                                                                                                                                                                                                                                                                                 |
| 2.02  | 9.43  | 1.01  | 8.92  | 0.00953179 | AT5G34865 |                                                                                                                                                                                                                                                                                                                                                                                                                              |
| 2.02  | 12.18 | 1.01  | 11.67 | 0.00480388 | AT5G38280 | PR5K__PR5-like receptor kinase                                                                                                                                                                                                                                                                                                                                                                                               |
| 2.02  | 12.97 | 1.01  | 12.47 | 0.03517777 | AT5G52750 | Heavy metal transport/detoxification superfamily protein                                                                                                                                                                                                                                                                                                                                                                     |
| 2.02  | 14.23 | 1.01  | 13.72 | 0.00486881 | ATCG00320 |                                                                                                                                                                                                                                                                                                                                                                                                                              |
| 2.01  | 10.01 | 1.01  | 9.51  | 0.00640693 | AT1G35600 |                                                                                                                                                                                                                                                                                                                                                                                                                              |
| 2.01  | 11.39 | 1.01  | 10.89 | 0.00763771 | AT1G36540 |                                                                                                                                                                                                                                                                                                                                                                                                                              |
| 2.01  | 12.52 | 1.01  | 12.01 | 0.00763565 | AT1G42605 |                                                                                                                                                                                                                                                                                                                                                                                                                              |
| 2.01  | 9.7   | 1.01  | 9.19  | 0.03657021 | AT1G47990 | ATGA2OX4_GA2OX4__gibberellin 2-oxidase 4                                                                                                                                                                                                                                                                                                                                                                                     |
| 2.01  | 9.31  | 1     | 8.81  | 0.00306866 | AT2G06720 |                                                                                                                                                                                                                                                                                                                                                                                                                              |
| 2.01  | 12.59 | 1.01  | 12.09 | 0.00873067 | AT2G07729 |                                                                                                                                                                                                                                                                                                                                                                                                                              |
| 2.01  | 12.68 | 1.01  | 12.18 | 0.00730315 | AT2G07747 |                                                                                                                                                                                                                                                                                                                                                                                                                              |
| 2.01  | 11.14 | 1.01  | 10.63 | 0.00755929 | AT2G12240 | unknown protein; BEST Arabidopsis thaliana protein match is: unknown protein<br>(TAIR:AT5G01225.1); Has 35333 Blast hits to 34131 proteins in 2444 species: Archae - 798;<br>Bacteria - 22429; Metazoa - 974; Fungi - 991; Plants - 531; Viruses - 0; Other Eukaryotes - 9610<br>(source: NCBI BLink).                                                                                                                       |
| 2.01  | 10.66 | 1.01  | 10.15 | 0.00487538 | AT3G09032 |                                                                                                                                                                                                                                                                                                                                                                                                                              |
| 2.01  | 9.45  | 1.01  | 8.94  | 0.00636507 | AT3G32890 |                                                                                                                                                                                                                                                                                                                                                                                                                              |
| 2.01  | 10.73 | 1.01  | 10.22 | 0.00483444 | AT3G33058 |                                                                                                                                                                                                                                                                                                                                                                                                                              |
| 2.01  | 12.87 | 1.01  | 12.37 | 0.00508871 | AT3G47570 | Leucine-rich repeat protein kinase family protein                                                                                                                                                                                                                                                                                                                                                                            |
| 2.01  | 12.59 | 1.01  | 12.08 | 0.00717498 | AT4G06586 |                                                                                                                                                                                                                                                                                                                                                                                                                              |
| 2.01  | 11.09 | 1     | 10.59 | 0.00485723 | AT4G27460 | Cystathionine beta-synthase (CBS) family protein                                                                                                                                                                                                                                                                                                                                                                             |
| 2.01  | 12.2  | 1.01  | 11.7  | 0.01159209 | AT5G10720 | AHK5_CKI2_HK5__histidine kinase 5                                                                                                                                                                                                                                                                                                                                                                                            |
| 2.01  | 10.84 | 1.01  | 10.33 | 0.00526334 | AT5G34985 | unknown protein; FUNCTIONS IN: molecular_function unknown; INVOLVED IN:<br>biological_process unknown; LOCATED IN: cellular_component unknown; Has 0 Blast hits to 0<br>proteins in 0 species (source: NCBI BLink).                                                                                                                                                                                                          |
| -2.01 | 8.22  | -1.01 | 8.72  | 0.02208575 | AT1G07885 |                                                                                                                                                                                                                                                                                                                                                                                                                              |
| -2.01 | 7.96  | -1.01 | 8.46  | 0.00394838 | AT1G22590 | AGL87__AGAMOUS-like 87 AGL87__AGAMOUS-like 87                                                                                                                                                                                                                                                                                                                                                                                |

|       |       |       |       |            |           |                                                                                                                                                                                                                                                                                                                                             |
|-------|-------|-------|-------|------------|-----------|---------------------------------------------------------------------------------------------------------------------------------------------------------------------------------------------------------------------------------------------------------------------------------------------------------------------------------------------|
| -2.01 | 8.78  | -1.01 | 9.29  | 0.01992898 | AT1G56165 |                                                                                                                                                                                                                                                                                                                                             |
| -2.01 | 7.56  | -1.01 | 8.06  | 0.0436797  | AT1G61097 | Expressed protein                                                                                                                                                                                                                                                                                                                           |
| -2.01 | 8.26  | -1.01 | 8.76  | 0.00649867 | AT1G67265 | DVL3_RTFL21__ROTUNDIFOLIA like 21                                                                                                                                                                                                                                                                                                           |
| -2.01 | 11.73 | -1.01 | 12.23 | 0.00470122 | AT1G75180 | Erythronate-4-phosphate dehydrogenase family protein                                                                                                                                                                                                                                                                                        |
| -2.01 | 9.94  | -1.01 | 10.45 | 0.00433482 | AT2G17470 | ALMT6_AtALMT6__Aluminium activated malate transporter family protein                                                                                                                                                                                                                                                                        |
| -2.01 | 8.1   | -1.01 | 8.6   | 0.01457695 | AT2G30690 | Protein of unknown function, DUF593                                                                                                                                                                                                                                                                                                         |
| -2.01 | 10.12 | -1.01 | 10.62 | 0.00829215 | AT3G08840 | D-alanine--D-alanine ligase family                                                                                                                                                                                                                                                                                                          |
| -2.01 | 12.53 | -1.01 | 13.03 | 0.00479295 | AT3G11470 | 4'-phosphopantetheinyl transferase superfamily                                                                                                                                                                                                                                                                                              |
| -2.01 | 13.92 | -1.01 | 14.43 | 0.00435453 | AT3G11670 | DGD1__UDP-Glycosyltransferase superfamily protein                                                                                                                                                                                                                                                                                           |
| -2.01 | 9.21  | -1.01 | 9.71  | 0.00636507 | AT3G13680 | F-box and associated interaction domains-containing protein                                                                                                                                                                                                                                                                                 |
| -2.01 | 10.85 | -1.01 | 11.35 | 0.04812464 | AT3G30720 | QQS__qua-quine starch                                                                                                                                                                                                                                                                                                                       |
| -2.01 | 13.09 | -1    | 13.6  | 0.00486881 | AT4G13493 |                                                                                                                                                                                                                                                                                                                                             |
| -2.01 | 11.04 | -1.01 | 11.54 | 0.00470122 | AT4G16470 | Tetratricopeptide repeat (TPR)-like superfamily protein<br>unknown protein; FUNCTIONS IN: molecular_function unknown; INVOLVED IN:<br>biological_process unknown; LOCATED IN: cellular_component unknown; Has 0 Blast hits to 0<br>proteins in 0 species (source: NCBI BLink).                                                              |
| -2.01 | 9.74  | -1.01 | 10.25 | 0.00660299 | AT4G37022 |                                                                                                                                                                                                                                                                                                                                             |
| -2.01 | 9.85  | -1.01 | 10.36 | 0.00329522 | AT5G10140 | AGL25_FLC_FLC_FLF__K-box region and MADS-box transcription factor family protein                                                                                                                                                                                                                                                            |
| -2.01 | 10    | -1.01 | 10.51 | 0.0120122  | AT5G17780 | alpha/beta-Hydrolases superfamily protein                                                                                                                                                                                                                                                                                                   |
| -2.01 | 7.12  | -1.01 | 7.63  | 0.00478732 | AT5G26345 |                                                                                                                                                                                                                                                                                                                                             |
| -2.01 | 12.88 | -1.01 | 13.38 | 0.00625393 | AT5G47900 | Protein of unknown function (DUF1624) Protein of unknown function (DUF1624) Protein of<br>unknown function (DUF1624)                                                                                                                                                                                                                        |
| -2.01 | 7.21  | -1.01 | 7.71  | 0.0165446  | AT5G64520 | ATXRCC2_XRCC2__homolog of X-ray repair cross complementing 2 (XRCC2)<br>unknown protein; Has 6 Blast hits to 6 proteins in 2 species: Archae - 0; Bacteria - 0; Metazoa - 0;<br>Fungi - 0; Plants - 6; Viruses - 0; Other Eukaryotes - 0 (source: NCBI BLink).                                                                              |
| -2.02 | 8.45  | -1.01 | 8.96  | 0.01021897 | AT1G05330 |                                                                                                                                                                                                                                                                                                                                             |
| -2.02 | 10.59 | -1.02 | 11.1  | 0.0093984  | AT1G32385 |                                                                                                                                                                                                                                                                                                                                             |
| -2.02 | 13.36 | -1.01 | 13.86 | 0.0029534  | AT1G63360 | Disease resistance protein (CC-NBS-LRR class) family                                                                                                                                                                                                                                                                                        |
| -2.02 | 14.6  | -1.02 | 15.1  | 0.00737142 | AT1G64900 | CYP89_CYP89A2__cytochrome P450, family 89, subfamily A, polypeptide 2                                                                                                                                                                                                                                                                       |
| -2.02 | 12.51 | -1.02 | 13.02 | 0.00611309 | AT1G66920 | Protein kinase superfamily protein                                                                                                                                                                                                                                                                                                          |
| -2.02 | 11.36 | -1.02 | 11.87 | 0.00480388 | AT2G23470 | RUS4__Protein of unknown function, DUF647<br>unknown protein; BEST Arabidopsis thaliana protein match is: unknown protein<br>(TAIR:AT4G01170.1); Has 1299 Blast hits to 1149 proteins in 206 species: Archae - 3; Bacteria -<br>100; Metazoa - 453; Fungi - 114; Plants - 108; Viruses - 2; Other Eukaryotes - 519 (source: NCBI<br>BLink). |
| -2.02 | 11.56 | -1.02 | 12.07 | 0.01373422 | AT3G07730 |                                                                                                                                                                                                                                                                                                                                             |
| -2.02 | 8.21  | -1.01 | 8.72  | 0.00433482 | AT3G48300 | CYP71A23__cytochrome P450, family 71, subfamily A, polypeptide 23                                                                                                                                                                                                                                                                           |
| -2.02 | 10.43 | -1.02 | 10.94 | 0.03148877 | AT4G13680 | Protein of unknown function (DUF295)                                                                                                                                                                                                                                                                                                        |
| -2.02 | 11.74 | -1.02 | 12.25 | 0.00356968 | AT4G29400 | Protein of unknown function (DUF3531)                                                                                                                                                                                                                                                                                                       |

|       |       |       |       |            |           |                                                                                                                                                                                                                                                                                                                                                                                                                                                                                                                                                                                                                                                                                                                                                   |
|-------|-------|-------|-------|------------|-----------|---------------------------------------------------------------------------------------------------------------------------------------------------------------------------------------------------------------------------------------------------------------------------------------------------------------------------------------------------------------------------------------------------------------------------------------------------------------------------------------------------------------------------------------------------------------------------------------------------------------------------------------------------------------------------------------------------------------------------------------------------|
| -2.02 | 8.8   | -1.01 | 9.3   | 0.00309366 | AT5G04800 | Ribosomal S17 family protein                                                                                                                                                                                                                                                                                                                                                                                                                                                                                                                                                                                                                                                                                                                      |
|       |       |       |       |            |           | SQE5_SQP1__FAD/NAD(P)-binding oxidoreductase family protein                                                                                                                                                                                                                                                                                                                                                                                                                                                                                                                                                                                                                                                                                       |
| -2.02 | 14.73 | -1.01 | 15.23 | 0.0069202  | AT5G24150 | SQE5_SQP1__FAD/NAD(P)-binding oxidoreductase family protein                                                                                                                                                                                                                                                                                                                                                                                                                                                                                                                                                                                                                                                                                       |
| -2.02 | 13.72 | -1.01 | 14.22 | 0.00764436 | AT5G25130 | CYP71B12__cytochrome P450, family 71, subfamily B, polypeptide 12                                                                                                                                                                                                                                                                                                                                                                                                                                                                                                                                                                                                                                                                                 |
| -2.02 | 9.39  | -1.02 | 9.9   | 0.006151   | AT5G64250 | Aldolase-type TIM barrel family protein                                                                                                                                                                                                                                                                                                                                                                                                                                                                                                                                                                                                                                                                                                           |
| -2.02 | 8.31  | -1.01 | 8.82  | 0.0106626  | AT5G65130 | Integrase-type DNA-binding superfamily protein                                                                                                                                                                                                                                                                                                                                                                                                                                                                                                                                                                                                                                                                                                    |
| -2.03 | 8.83  | -1.02 | 9.34  | 0.01590268 | AT1G33730 | CYP76C5__cytochrome P450, family 76, subfamily C, polypeptide 5                                                                                                                                                                                                                                                                                                                                                                                                                                                                                                                                                                                                                                                                                   |
| -2.03 | 13.64 | -1.02 | 14.15 | 0.00537072 | AT1G52590 | Putative thiol-disulphide oxidoreductase DCC                                                                                                                                                                                                                                                                                                                                                                                                                                                                                                                                                                                                                                                                                                      |
| -2.03 | 9.53  | -1.02 | 10.04 | 0.00526334 | AT1G64990 | GTG1__GPCR-type G protein 1                                                                                                                                                                                                                                                                                                                                                                                                                                                                                                                                                                                                                                                                                                                       |
|       |       |       |       |            |           | unknown protein; Has 6 Blast hits to 5 proteins in 2 species: Archae - 0; Bacteria - 0; Metazoa - 0; Fungi - 0; Plants - 6; Viruses - 0; Other Eukaryotes - 0 (source: NCBI BLink).                                                                                                                                                                                                                                                                                                                                                                                                                                                                                                                                                               |
| -2.03 | 10.69 | -1.02 | 11.2  | 0.01984609 | AT1G75770 | Fungi - 0; Plants - 6; Viruses - 0; Other Eukaryotes - 0 (source: NCBI BLink).                                                                                                                                                                                                                                                                                                                                                                                                                                                                                                                                                                                                                                                                    |
| -2.03 | 12.17 | -1.02 | 12.68 | 0.02238487 | AT2G18120 | SRS4__SHI-related sequence 4                                                                                                                                                                                                                                                                                                                                                                                                                                                                                                                                                                                                                                                                                                                      |
| -2.03 | 11.32 | -1.02 | 11.83 | 0.01375277 | AT2G22800 | HAT9__Homeobox-leucine zipper protein family                                                                                                                                                                                                                                                                                                                                                                                                                                                                                                                                                                                                                                                                                                      |
| -2.03 | 9.25  | -1.02 | 9.76  | 0.01044382 | AT2G29680 | ATCDC6_CDC6__cell division control 6                                                                                                                                                                                                                                                                                                                                                                                                                                                                                                                                                                                                                                                                                                              |
|       |       |       |       |            |           | unknown protein; CONTAINS InterPro DOMAIN/s: Protein of unknown function DUF688 (InterPro:IPR007789); BEST Arabidopsis thaliana protein match is: unknown protein (TAIR:AT4G27810.1); Has 1807 Blast hits to 1807 proteins in 277 species: Archae - 0; Bacteria - 0; Metazoa - 736; Fungi - 347; Plants - 385; Viruses - 0; Other Eukaryotes - 339 (source: NCBI BLink). unknown protein; CONTAINS InterPro DOMAIN/s: Protein of unknown function DUF688 (InterPro:IPR007789); BEST Arabidopsis thaliana protein match is: unknown protein (TAIR:AT4G27810.1); Has 1807 Blast hits to 1807 proteins in 277 species: Archae - 0; Bacteria - 0; Metazoa - 736; Fungi - 347; Plants - 385; Viruses - 0; Other Eukaryotes - 339 (source: NCBI BLink). |
| -2.03 | 10.68 | -1.02 | 11.19 | 0.00542693 | AT5G53030 |                                                                                                                                                                                                                                                                                                                                                                                                                                                                                                                                                                                                                                                                                                                                                   |
| -2.03 | 11.16 | -1.02 | 11.67 | 0.00429467 | AT5G59630 |                                                                                                                                                                                                                                                                                                                                                                                                                                                                                                                                                                                                                                                                                                                                                   |
|       |       |       |       |            |           | unknown protein; BEST Arabidopsis thaliana protein match is: unknown protein (TAIR:AT2G16575.1); Has 13 Blast hits to 13 proteins in 2 species: Archae - 0; Bacteria - 0; Metazoa - 0; Fungi - 0; Plants - 13; Viruses - 0; Other Eukaryotes - 0 (source: NCBI BLink).                                                                                                                                                                                                                                                                                                                                                                                                                                                                            |
| -2.04 | 8.6   | -1.03 | 9.11  | 0.02155292 | AT1G17780 | Metazoa - 0; Fungi - 0; Plants - 13; Viruses - 0; Other Eukaryotes - 0 (source: NCBI BLink).                                                                                                                                                                                                                                                                                                                                                                                                                                                                                                                                                                                                                                                      |
| -2.04 | 12.04 | -1.03 | 12.56 | 0.01665892 | AT1G20350 | ATTIM17-1_TIM17-1__translocase inner membrane subunit 17-1                                                                                                                                                                                                                                                                                                                                                                                                                                                                                                                                                                                                                                                                                        |
| -2.04 | 9.2   | -1.03 | 9.71  | 0.0198452  | AT1G48400 | F-box/RNI-like/FBD-like domains-containing protein                                                                                                                                                                                                                                                                                                                                                                                                                                                                                                                                                                                                                                                                                                |
| -2.04 | 12.79 | -1.03 | 13.3  | 0.02876339 | AT1G65870 | Disease resistance-responsive (dirigent-like protein) family protein                                                                                                                                                                                                                                                                                                                                                                                                                                                                                                                                                                                                                                                                              |
| -2.04 | 12.16 | -1.03 | 12.68 | 0.00294186 | AT2G04230 | FBD, F-box and Leucine Rich Repeat domains containing protein                                                                                                                                                                                                                                                                                                                                                                                                                                                                                                                                                                                                                                                                                     |
| -2.04 | 9.52  | -1.03 | 10.04 | 0.00449194 | AT2G21187 |                                                                                                                                                                                                                                                                                                                                                                                                                                                                                                                                                                                                                                                                                                                                                   |
|       |       |       |       |            |           | unknown protein; Has 15 Blast hits to 15 proteins in 7 species: Archae - 0; Bacteria - 0; Metazoa - 0; Fungi - 0; Plants - 15; Viruses - 0; Other Eukaryotes - 0 (source: NCBI BLink).                                                                                                                                                                                                                                                                                                                                                                                                                                                                                                                                                            |
| -2.04 | 13.03 | -1.03 | 13.54 | 0.00886809 | AT3G06145 | 0; Fungi - 0; Plants - 15; Viruses - 0; Other Eukaryotes - 0 (source: NCBI BLink).                                                                                                                                                                                                                                                                                                                                                                                                                                                                                                                                                                                                                                                                |
| -2.04 | 13.42 | -1.03 | 13.94 | 0.00547874 | AT3G14770 | AtSWEET2_SWEET2__Nodulin MtN3 family protein                                                                                                                                                                                                                                                                                                                                                                                                                                                                                                                                                                                                                                                                                                      |
| -2.04 | 11.94 | -1.03 | 12.45 | 0.00539445 | AT3G15115 | unknown protein; BEST Arabidopsis thaliana protein match is: unknown protein                                                                                                                                                                                                                                                                                                                                                                                                                                                                                                                                                                                                                                                                      |

|       |       |       |       |            |           |                                                                                                                                                                                                                                                                                                                                                                                                                                                                                                                                                                           |
|-------|-------|-------|-------|------------|-----------|---------------------------------------------------------------------------------------------------------------------------------------------------------------------------------------------------------------------------------------------------------------------------------------------------------------------------------------------------------------------------------------------------------------------------------------------------------------------------------------------------------------------------------------------------------------------------|
|       |       |       |       |            |           | (TAIR:AT1G53180.1); Has 47 Blast hits to 47 proteins in 15 species: Archae - 0; Bacteria - 0; Metazoa - 13; Fungi - 0; Plants - 30; Viruses - 0; Other Eukaryotes - 4 (source: NCBI BLink).                                                                                                                                                                                                                                                                                                                                                                               |
| -2.04 | 13.84 | -1.03 | 14.35 | 0.00597898 | AT3G22420 | ATWINK2_WNK2_ZIK3__with no lysine (K) kinase 2                                                                                                                                                                                                                                                                                                                                                                                                                                                                                                                            |
| -2.04 | 11.93 | -1.03 | 12.44 | 0.00814975 | AT3G60160 | ABCC9_ATMRP9_MRP9__multidrug resistance-associated protein 9                                                                                                                                                                                                                                                                                                                                                                                                                                                                                                              |
| -2.04 | 8.81  | -1.03 | 9.32  | 0.04595734 | AT4G01490 |                                                                                                                                                                                                                                                                                                                                                                                                                                                                                                                                                                           |
| -2.04 | 14.03 | -1.03 | 14.54 | 0.02464648 | AT4G26150 | CGA1_GATA22_GNL__cytokinin-responsive gata factor 1                                                                                                                                                                                                                                                                                                                                                                                                                                                                                                                       |
| -2.04 | 13.03 | -1.03 | 13.54 | 0.00356968 | AT4G35290 | ATGLR3.2_ATGLUR2_GLR3.2_GLUR2__glutamate receptor 2                                                                                                                                                                                                                                                                                                                                                                                                                                                                                                                       |
| -2.04 | 11.88 | -1.03 | 12.4  | 0.01962777 | AT5G16080 | AtCXE17_CXE17__carboxyesterase 17                                                                                                                                                                                                                                                                                                                                                                                                                                                                                                                                         |
| -2.04 | 7.84  | -1.03 | 8.35  | 0.01273993 | AT5G28360 |                                                                                                                                                                                                                                                                                                                                                                                                                                                                                                                                                                           |
|       |       |       |       |            |           | Protein of unknown function (DUF1624) Protein of unknown function (DUF1624) Protein of unknown function (DUF1624)                                                                                                                                                                                                                                                                                                                                                                                                                                                         |
| -2.04 | 13.3  | -1.03 | 13.81 | 0.00627482 | AT5G47900 | zinc finger protein-related                                                                                                                                                                                                                                                                                                                                                                                                                                                                                                                                               |
| -2.04 | 13.61 | -1.03 | 14.12 | 0.00561713 | AT5G54630 | unknown protein; EXPRESSED IN: 21 plant structures; EXPRESSED DURING: 13 growth stages; Has 35333 Blast hits to 34131 proteins in 2444 species: Archae - 798; Bacteria - 22429; Metazoa - 974; Fungi - 991; Plants - 531; Viruses - 0; Other Eukaryotes - 9610 (source: NCBI BLink). unknown protein; EXPRESSED IN: 21 plant structures; EXPRESSED DURING: 13 growth stages; Has 35333 Blast hits to 34131 proteins in 2444 species: Archae - 798; Bacteria - 22429; Metazoa - 974; Fungi - 991; Plants - 531; Viruses - 0; Other Eukaryotes - 9610 (source: NCBI BLink). |
| -2.04 | 14.16 | -1.03 | 14.68 | 0.00455949 | AT5G56850 | NCBI BLink).                                                                                                                                                                                                                                                                                                                                                                                                                                                                                                                                                              |
| -2.05 | 9.06  | -1.04 | 9.58  | 0.01123603 | AT1G29490 | SAUR-like auxin-responsive protein family                                                                                                                                                                                                                                                                                                                                                                                                                                                                                                                                 |
| -2.05 | 9.16  | -1.04 | 9.68  | 0.01227536 | AT1G55545 |                                                                                                                                                                                                                                                                                                                                                                                                                                                                                                                                                                           |
| -2.05 | 10.41 | -1.04 | 10.93 | 0.01671458 | AT1G78750 | F-box/RNI-like superfamily protein                                                                                                                                                                                                                                                                                                                                                                                                                                                                                                                                        |
| -2.05 | 12.18 | -1.03 | 12.7  | 0.00518233 | AT2G01918 | PQL3__PsbQ-like 3                                                                                                                                                                                                                                                                                                                                                                                                                                                                                                                                                         |
| -2.05 | 7.48  | -1.04 | 7.99  | 0.01850719 | AT2G26692 |                                                                                                                                                                                                                                                                                                                                                                                                                                                                                                                                                                           |
| -2.05 | 11.14 | -1.03 | 11.66 | 0.00489929 | AT2G29910 | F-box/RNI-like superfamily protein                                                                                                                                                                                                                                                                                                                                                                                                                                                                                                                                        |
| -2.05 | 8.81  | -1.03 | 9.33  | 0.04552858 | AT3G02515 |                                                                                                                                                                                                                                                                                                                                                                                                                                                                                                                                                                           |
|       |       |       |       |            |           | unknown protein; Has 20 Blast hits to 20 proteins in 7 species: Archae - 0; Bacteria - 0; Metazoa - 0; Fungi - 0; Plants - 20; Viruses - 0; Other Eukaryotes - 0 (source: NCBI BLink).                                                                                                                                                                                                                                                                                                                                                                                    |
| -2.05 | 12.64 | -1.04 | 13.16 | 0.01887253 | AT4G24700 | Carbohydrate-binding-like fold Carbohydrate-binding-like fold                                                                                                                                                                                                                                                                                                                                                                                                                                                                                                             |
| -2.05 | 11.55 | -1.04 | 12.07 | 0.00784132 | AT5G01260 | unknown protein; FUNCTIONS IN: molecular_function unknown; INVOLVED IN: biological_process unknown; LOCATED IN: endomembrane system; Has 30201 Blast hits to 17322 proteins in 780 species: Archae - 12; Bacteria - 1396; Metazoa - 17338; Fungi - 3422; Plants - 5037; Viruses - 0; Other Eukaryotes - 2996 (source: NCBI BLink).                                                                                                                                                                                                                                        |
| -2.05 | 11.53 | -1.03 | 12.05 | 0.00490678 | AT5G10946 |                                                                                                                                                                                                                                                                                                                                                                                                                                                                                                                                                                           |
| -2.05 | 13.56 | -1.03 | 14.08 | 0.04014525 | AT5G15948 | CPuORF10__conserved peptide upstream open reading frame 10                                                                                                                                                                                                                                                                                                                                                                                                                                                                                                                |
| -2.05 | 12.46 | -1.04 | 12.98 | 0.00433482 | AT5G46390 | Peptidase S41 family protein                                                                                                                                                                                                                                                                                                                                                                                                                                                                                                                                              |
| -2.05 | 9.81  | -1.04 | 10.32 | 0.00766115 | AT5G49380 | CONTAINS InterPro DOMAIN/s: Protein of unknown function DUF625 (InterPro:IPR006887);                                                                                                                                                                                                                                                                                                                                                                                                                                                                                      |

|       |       |       |       |            |           |                                                                                                                                                                                                                                                                                                                                                                  |
|-------|-------|-------|-------|------------|-----------|------------------------------------------------------------------------------------------------------------------------------------------------------------------------------------------------------------------------------------------------------------------------------------------------------------------------------------------------------------------|
|       |       |       |       |            |           | BEST Arabidopsis thaliana protein match is: binding (TAIR:AT3G06670.1); Has 1807 Blast hits to 1807 proteins in 277 species: Archae - 0; Bacteria - 0; Metazoa - 736; Fungi - 347; Plants - 385; Viruses - 0; Other Eukaryotes - 339 (source: NCBI BLINK).                                                                                                       |
|       |       |       |       |            |           | Encodes a close homolog of the Cauliflower OR (Orange) protein. The function of OR is to induce the differentiation of proplastids or other noncolored plastids into chromoplasts for carotenoid accumulation. Both proteins contain a Cysteine-rich zinc finger domain that is highly specific to                                                               |
| -2.05 | 10.6  | -1.03 | 11.12 | 0.00950083 | AT5G61670 | DnaJ-like molecular chaperons.                                                                                                                                                                                                                                                                                                                                   |
| -2.06 | 13.01 | -1.04 | 13.53 | 0.00714664 | AT1G03400 | 2-oxoglutarate (2OG) and Fe(II)-dependent oxygenase superfamily protein                                                                                                                                                                                                                                                                                          |
| -2.06 | 11.93 | -1.04 | 12.45 | 0.01649691 | AT1G48100 | Pectin lyase-like superfamily protein                                                                                                                                                                                                                                                                                                                            |
| -2.06 | 13.42 | -1.04 | 13.94 | 0.00514085 | AT1G71810 | Protein kinase superfamily protein                                                                                                                                                                                                                                                                                                                               |
| -2.06 | 10.03 | -1.04 | 10.55 | 0.00426996 | AT2G12460 |                                                                                                                                                                                                                                                                                                                                                                  |
| -2.06 | 11.07 | -1.05 | 11.6  | 0.03067696 | AT2G20880 | AtERF53_ERF53__Integrase-type DNA-binding superfamily protein                                                                                                                                                                                                                                                                                                    |
| -2.06 | 13.2  | -1.04 | 13.72 | 0.0033501  | AT2G26215 |                                                                                                                                                                                                                                                                                                                                                                  |
| -2.06 | 13.49 | -1.04 | 14.01 | 0.00447426 | AT2G32860 | BGLU33__beta glucosidase 33                                                                                                                                                                                                                                                                                                                                      |
| -2.06 | 8.38  | -1.04 | 8.9   | 0.04273327 | AT3G21380 | Mannose-binding lectin superfamily protein                                                                                                                                                                                                                                                                                                                       |
| -2.06 | 12.11 | -1.04 | 12.63 | 0.00446653 | AT4G13880 | AtRLP48_RLP48__receptor like protein 48                                                                                                                                                                                                                                                                                                                          |
|       |       |       |       |            |           | unknown protein; FUNCTIONS IN: molecular_function unknown; INVOLVED IN: biological_process unknown; LOCATED IN: cellular_component unknown; EXPRESSED IN: egg cell; Has 84 Blast hits to 81 proteins in 31 species: Archae - 0; Bacteria - 0; Metazoa - 42; Fungi - 0; Plants - 41; Viruses - 0; Other Eukaryotes - 1 (source: NCBI BLINK).                      |
| -2.06 | 9.05  | -1.04 | 9.57  | 0.00788752 | AT5G07380 | Fungi - 0; Plants - 41; Viruses - 0; Other Eukaryotes - 1 (source: NCBI BLINK).                                                                                                                                                                                                                                                                                  |
| -2.06 | 12.57 | -1.04 | 13.09 | 0.00508663 | AT5G63060 | Sec14p-like phosphatidylinositol transfer family protein                                                                                                                                                                                                                                                                                                         |
| -2.07 | 10.81 | -1.05 | 11.33 | 0.00873067 | AT1G08810 | AtMYB60_MYB60__myb domain protein 60 AtMYB60_MYB60__myb domain protein 60                                                                                                                                                                                                                                                                                        |
| -2.07 | 13.67 | -1.05 | 14.19 | 0.0182935  | AT1G27480 | alpha/beta-Hydrolases superfamily protein                                                                                                                                                                                                                                                                                                                        |
| -2.07 | 11.51 | -1.05 | 12.04 | 0.0052996  | AT2G27770 | Plant protein of unknown function (DUF868)                                                                                                                                                                                                                                                                                                                       |
| -2.07 | 10.7  | -1.05 | 11.22 | 0.04980088 | AT2G38210 | PDX1L4__putative PDX1-like protein 4                                                                                                                                                                                                                                                                                                                             |
| -2.07 | 10.34 | -1.05 | 10.86 | 0.01920193 | AT2G40670 | ARR16_RR16__response regulator 16                                                                                                                                                                                                                                                                                                                                |
| -2.07 | 8.39  | -1.05 | 8.92  | 0.00459015 | AT3G05620 | Plant invertase/pectin methylesterase inhibitor superfamily                                                                                                                                                                                                                                                                                                      |
| -2.07 | 10.34 | -1.05 | 10.87 | 0.00655859 | AT3G26085 | CAAX amino terminal protease family protein                                                                                                                                                                                                                                                                                                                      |
| -2.07 | 10.82 | -1.05 | 11.34 | 0.00508871 | AT3G51075 |                                                                                                                                                                                                                                                                                                                                                                  |
| -2.07 | 8.19  | -1.05 | 8.71  | 0.00508663 | AT4G23250 | CRK17_DUF26-21_EMB1290_RKC1__kinases;protein kinases                                                                                                                                                                                                                                                                                                             |
| -2.07 | 11.52 | -1.05 | 12.05 | 0.00731488 | AT4G25300 | 2-oxoglutarate (2OG) and Fe(II)-dependent oxygenase superfamily protein                                                                                                                                                                                                                                                                                          |
| -2.07 | 9.91  | -1.05 | 10.43 | 0.03662507 | AT5G45630 | Protein of unknown function, DUF584                                                                                                                                                                                                                                                                                                                              |
|       |       |       |       |            |           | unknown protein; CONTAINS InterPro DOMAIN/s: Protein of unknown function DUF688 (InterPro:IPR007789); BEST Arabidopsis thaliana protein match is: unknown protein (TAIR:AT4G27810.1); Has 1807 Blast hits to 1807 proteins in 277 species: Archae - 0; Bacteria - 0; Metazoa - 736; Fungi - 347; Plants - 385; Viruses - 0; Other Eukaryotes - 339 (source: NCBI |
| -2.07 | 10.95 | -1.05 | 11.47 | 0.02078417 | AT5G53030 | 0; Metazoa - 736; Fungi - 347; Plants - 385; Viruses - 0; Other Eukaryotes - 339 (source: NCBI                                                                                                                                                                                                                                                                   |



|       |       |       |       |            |           |                                                                                                                                                                                                                                                                                                                                                                                                                                                                                                                                                                                                                                                                                                                                                                                                                                                                                                                                                                                                                                                                                                                                                                                                                                                                                                                                                                                                         |
|-------|-------|-------|-------|------------|-----------|---------------------------------------------------------------------------------------------------------------------------------------------------------------------------------------------------------------------------------------------------------------------------------------------------------------------------------------------------------------------------------------------------------------------------------------------------------------------------------------------------------------------------------------------------------------------------------------------------------------------------------------------------------------------------------------------------------------------------------------------------------------------------------------------------------------------------------------------------------------------------------------------------------------------------------------------------------------------------------------------------------------------------------------------------------------------------------------------------------------------------------------------------------------------------------------------------------------------------------------------------------------------------------------------------------------------------------------------------------------------------------------------------------|
|       |       |       |       |            |           | BLink). unknown protein; CONTAINS InterPro DOMAIN/s: Protein of unknown function DUF688 (InterPro:IPR007789); BEST Arabidopsis thaliana protein match is: unknown protein (TAIR:AT4G27810.1); Has 1807 Blast hits to 1807 proteins in 277 species: Archae - 0; Bacteria - 0; Metazoa - 736; Fungi - 347; Plants - 385; Viruses - 0; Other Eukaryotes - 339 (source: NCBI BLink).                                                                                                                                                                                                                                                                                                                                                                                                                                                                                                                                                                                                                                                                                                                                                                                                                                                                                                                                                                                                                        |
| -2.08 | 9.43  | -1.06 | 9.95  | 0.01672072 | AT1G02470 | Polyketide cyclase/dehydrase and lipid transport superfamily protein                                                                                                                                                                                                                                                                                                                                                                                                                                                                                                                                                                                                                                                                                                                                                                                                                                                                                                                                                                                                                                                                                                                                                                                                                                                                                                                                    |
| -2.08 | 13.79 | -1.05 | 14.32 | 0.00424195 | AT1G43790 | TED6__tracheary element differentiation-related 6                                                                                                                                                                                                                                                                                                                                                                                                                                                                                                                                                                                                                                                                                                                                                                                                                                                                                                                                                                                                                                                                                                                                                                                                                                                                                                                                                       |
| -2.08 | 8.74  | -1.06 | 9.26  | 0.03713676 | AT1G65960 | GAD2__glutamate decarboxylase 2                                                                                                                                                                                                                                                                                                                                                                                                                                                                                                                                                                                                                                                                                                                                                                                                                                                                                                                                                                                                                                                                                                                                                                                                                                                                                                                                                                         |
| -2.08 | 8.39  | -1.06 | 8.92  | 0.0067964  | AT1G69540 | AGL94__AGAMOUS-like 94                                                                                                                                                                                                                                                                                                                                                                                                                                                                                                                                                                                                                                                                                                                                                                                                                                                                                                                                                                                                                                                                                                                                                                                                                                                                                                                                                                                  |
| -2.08 | 12.11 | -1.05 | 12.64 | 0.00869468 | AT1G70985 | hydroxyproline-rich glycoprotein family protein                                                                                                                                                                                                                                                                                                                                                                                                                                                                                                                                                                                                                                                                                                                                                                                                                                                                                                                                                                                                                                                                                                                                                                                                                                                                                                                                                         |
| -2.08 | 11.68 | -1.06 | 12.21 | 0.00253321 | AT2G15080 | AtRLP19_RLP19__receptor like protein 19                                                                                                                                                                                                                                                                                                                                                                                                                                                                                                                                                                                                                                                                                                                                                                                                                                                                                                                                                                                                                                                                                                                                                                                                                                                                                                                                                                 |
| -2.08 | 9.45  | -1.05 | 9.97  | 0.04753624 | AT3G02670 | Glycine-rich protein family                                                                                                                                                                                                                                                                                                                                                                                                                                                                                                                                                                                                                                                                                                                                                                                                                                                                                                                                                                                                                                                                                                                                                                                                                                                                                                                                                                             |
| -2.08 | 15.02 | -1.06 | 15.55 | 0.00518233 | AT4G19170 | CCD4_NCED4__nine-cis-epoxycarotenoid dioxygenase 4                                                                                                                                                                                                                                                                                                                                                                                                                                                                                                                                                                                                                                                                                                                                                                                                                                                                                                                                                                                                                                                                                                                                                                                                                                                                                                                                                      |
| -2.08 | 9.04  | -1.06 | 9.56  | 0.01048515 | AT4G31398 |                                                                                                                                                                                                                                                                                                                                                                                                                                                                                                                                                                                                                                                                                                                                                                                                                                                                                                                                                                                                                                                                                                                                                                                                                                                                                                                                                                                                         |
| -2.08 | 11.21 | -1.05 | 11.73 | 0.00413041 | AT4G34060 | DML3__demeter-like protein 3 DML3__demeter-like protein 3                                                                                                                                                                                                                                                                                                                                                                                                                                                                                                                                                                                                                                                                                                                                                                                                                                                                                                                                                                                                                                                                                                                                                                                                                                                                                                                                               |
| -2.08 | 13.84 | -1.05 | 14.37 | 0.00601693 | AT5G21100 | Plant L-ascorbate oxidase                                                                                                                                                                                                                                                                                                                                                                                                                                                                                                                                                                                                                                                                                                                                                                                                                                                                                                                                                                                                                                                                                                                                                                                                                                                                                                                                                                               |
| -2.08 | 11.46 | -1.06 | 11.99 | 0.00760062 | AT5G45830 | ATDOG1_DOG1_GSQ5__delay of germination 1                                                                                                                                                                                                                                                                                                                                                                                                                                                                                                                                                                                                                                                                                                                                                                                                                                                                                                                                                                                                                                                                                                                                                                                                                                                                                                                                                                |
| -2.08 | 10.55 | -1.06 | 11.08 | 0.01083634 | AT5G52740 | Copper transport protein family                                                                                                                                                                                                                                                                                                                                                                                                                                                                                                                                                                                                                                                                                                                                                                                                                                                                                                                                                                                                                                                                                                                                                                                                                                                                                                                                                                         |
| -2.08 | 10.59 | -1.05 | 11.11 | 0.00512535 | AT5G59200 | OTP80__Tetratricopeptide repeat (TPR)-like superfamily protein                                                                                                                                                                                                                                                                                                                                                                                                                                                                                                                                                                                                                                                                                                                                                                                                                                                                                                                                                                                                                                                                                                                                                                                                                                                                                                                                          |
| -2.09 | 9.01  | -1.07 | 9.55  | 0.00951091 | AT1G73445 |                                                                                                                                                                                                                                                                                                                                                                                                                                                                                                                                                                                                                                                                                                                                                                                                                                                                                                                                                                                                                                                                                                                                                                                                                                                                                                                                                                                                         |
| -2.09 | 13.61 | -1.07 | 14.14 | 0.00608255 | AT1G76570 | Chlorophyll A-B binding family protein                                                                                                                                                                                                                                                                                                                                                                                                                                                                                                                                                                                                                                                                                                                                                                                                                                                                                                                                                                                                                                                                                                                                                                                                                                                                                                                                                                  |
|       |       |       |       |            |           | unknown protein; FUNCTIONS IN: molecular_function unknown; INVOLVED IN: biological_process unknown; EXPRESSED IN: 17 plant structures; EXPRESSED DURING: 11 growth stages; Has 33 Blast hits to 33 proteins in 10 species: Archae - 0; Bacteria - 0; Metazoa - 0; Fungi - 0; Plants - 33; Viruses - 0; Other Eukaryotes - 0 (source: NCBI BLink). unknown protein; FUNCTIONS IN: molecular_function unknown; INVOLVED IN: biological_process unknown; EXPRESSED IN: 17 plant structures; EXPRESSED DURING: 11 growth stages; Has 33 Blast hits to 33 proteins in 10 species: Archae - 0; Bacteria - 0; Metazoa - 0; Fungi - 0; Plants - 33; Viruses - 0; Other Eukaryotes - 0 (source: NCBI BLink). unknown protein; FUNCTIONS IN: molecular_function unknown; INVOLVED IN: biological_process unknown; EXPRESSED IN: 17 plant structures; EXPRESSED DURING: 11 growth stages; Has 33 Blast hits to 33 proteins in 10 species: Archae - 0; Bacteria - 0; Metazoa - 0; Fungi - 0; Plants - 33; Viruses - 0; Other Eukaryotes - 0 (source: NCBI BLink). unknown protein; FUNCTIONS IN: molecular_function unknown; INVOLVED IN: biological_process unknown; EXPRESSED IN: 17 plant structures; EXPRESSED DURING: 11 growth stages; Has 33 Blast hits to 33 proteins in 10 species: Archae - 0; Bacteria - 0; Metazoa - 0; Fungi - 0; Plants - 33; Viruses - 0; Other Eukaryotes - 0 (source: NCBI BLink). |
| -2.09 | 12.88 | -1.07 | 13.41 | 0.00413041 | AT2G04790 |                                                                                                                                                                                                                                                                                                                                                                                                                                                                                                                                                                                                                                                                                                                                                                                                                                                                                                                                                                                                                                                                                                                                                                                                                                                                                                                                                                                                         |

|       |       |       |       |            |           |                                                                                                                                                                                                   |
|-------|-------|-------|-------|------------|-----------|---------------------------------------------------------------------------------------------------------------------------------------------------------------------------------------------------|
|       |       |       |       |            |           | NCBI BLink).                                                                                                                                                                                      |
| -2.09 | 13.24 | -1.06 | 13.77 | 0.00288784 | AT2G16380 | Sec14p-like phosphatidylinositol transfer family protein                                                                                                                                          |
| -2.09 | 10.88 | -1.06 | 11.41 | 0.00619816 | AT2G42920 | Pentatricopeptide repeat (PPR-like) superfamily protein                                                                                                                                           |
| -2.09 | 10.08 | -1.06 | 10.61 | 0.00896923 | AT3G24518 |                                                                                                                                                                                                   |
| -2.09 | 8.64  | -1.07 | 9.17  | 0.04564272 | AT3G25180 | CYP82G1__cytochrome P450, family 82, subfamily G, polypeptide 1                                                                                                                                   |
| -2.09 | 13.7  | -1.06 | 14.23 | 0.01186197 | AT3G48720 | DCF__HXXXD-type acyl-transferase family protein                                                                                                                                                   |
| -2.09 | 9.61  | -1.07 | 10.14 | 0.00323071 | AT4G05130 | ATENT4_ENT4__equilibrative nucleoside transporter 4                                                                                                                                               |
| -2.09 | 8.38  | -1.07 | 8.91  | 0.00459015 | AT4G18375 | RNA-binding KH domain-containing protein                                                                                                                                                          |
| -2.09 | 10.11 | -1.06 | 10.64 | 0.003464   | AT4G29670 | ACHT2__atypical CYS HIS rich thioredoxin 2                                                                                                                                                        |
|       |       |       |       |            |           | SQE5_SQP1__FAD/NAD(P)-binding oxidoreductase family protein                                                                                                                                       |
| -2.09 | 14.71 | -1.06 | 15.24 | 0.00801286 | AT5G24150 | SQE5_SQP1__FAD/NAD(P)-binding oxidoreductase family protein                                                                                                                                       |
| -2.09 | 9.39  | -1.06 | 9.92  | 0.02498187 | AT5G46830 | ATNIG1_NIG1__NACL-inducible gene 1                                                                                                                                                                |
| -2.09 | 8.42  | -1.06 | 8.95  | 0.00891472 | AT5G52000 | IMPA-8__importin alpha isoform 8                                                                                                                                                                  |
| -2.1  | 12.03 | -1.07 | 12.56 | 0.00617912 | AT1G09490 | NAD(P)-binding Rossmann-fold superfamily protein                                                                                                                                                  |
| -2.1  | 11.65 | -1.07 | 12.18 | 0.0050256  | AT2G04270 | RNEE/G__RNAse E/G-like                                                                                                                                                                            |
| -2.1  | 14.57 | -1.07 | 15.11 | 0.00353373 | AT2G36630 | Sulfite exporter TauE/SafE family protein                                                                                                                                                         |
| -2.1  | 9.23  | -1.07 | 9.76  | 0.02867752 | AT3G18540 |                                                                                                                                                                                                   |
| -2.1  | 14.15 | -1.07 | 14.69 | 0.00356968 | AT3G50270 | HXXXD-type acyl-transferase family protein                                                                                                                                                        |
| -2.1  | 13.49 | -1.07 | 14.03 | 0.00356968 | AT3G53720 | ATCHX20_CHX20__cation/H+ exchanger 20                                                                                                                                                             |
| -2.1  | 9.75  | -1.07 | 10.29 | 0.00671183 | AT5G04830 | Nuclear transport factor 2 (NTF2) family protein                                                                                                                                                  |
| -2.1  | 11.9  | -1.07 | 12.43 | 0.01394525 | AT5G10930 | CIPK5_SnRK3.24__CBL-interacting protein kinase 5                                                                                                                                                  |
| -2.1  | 11.78 | -1.07 | 12.31 | 0.00638451 | AT5G40060 | Disease resistance protein (NBS-LRR class) family                                                                                                                                                 |
| -2.1  | 9.77  | -1.07 | 10.31 | 0.02266246 | AT5G40140 | RING/U-box superfamily protein with ARM repeat domain                                                                                                                                             |
|       |       |       |       |            |           | unknown protein; Has 30201 Blast hits to 17322 proteins in 780 species: Archae - 12; Bacteria - 1396; Metazoa - 17338; Fungi - 3422; Plants - 5037; Viruses - 0; Other Eukaryotes - 2996 (source: |
| -2.11 | 11.17 | -1.07 | 11.71 | 0.00519318 | AT1G04650 | NCBI BLink).                                                                                                                                                                                      |
| -2.11 | 12.47 | -1.08 | 13.01 | 0.00525619 | AT1G05900 | ATNTH2_NTH2__endonuclease III 2 ATNTH2_NTH2__endonuclease III 2                                                                                                                                   |
| -2.11 | 12.98 | -1.08 | 13.52 | 0.00873067 | AT1G76110 | HMG (high mobility group) box protein with ARID/BRIGHT DNA-binding domain                                                                                                                         |
| -2.11 | 9.72  | -1.08 | 10.26 | 0.0085162  | AT1G76520 | Auxin efflux carrier family protein                                                                                                                                                               |
| -2.11 | 9.71  | -1.08 | 10.25 | 0.00717498 | AT3G04960 | Domain of unknown function (DUF3444)                                                                                                                                                              |
| -2.11 | 10.5  | -1.08 | 11.03 | 0.00356968 | AT3G28130 | nodulin MtN21 /EamA-like transporter family protein                                                                                                                                               |
| -2.11 | 10.5  | -1.08 | 11.04 | 0.02679699 | AT3G53140 | O-methyltransferase family protein                                                                                                                                                                |
| -2.11 | 14.5  | -1.08 | 15.04 | 0.003464   | AT4G00750 | S-adenosyl-L-methionine-dependent methyltransferases superfamily protein                                                                                                                          |
| -2.11 | 13.44 | -1.08 | 13.97 | 0.00514085 | AT4G13800 | Protein of unknown function (DUF803)                                                                                                                                                              |
| -2.11 | 11.55 | -1.08 | 12.09 | 0.02613032 | AT5G02190 | ATASP38_EMB24_PCS1__Eukaryotic aspartyl protease family protein                                                                                                                                   |
| -2.11 | 8.06  | -1.08 | 8.6   | 0.00476616 | AT5G26970 | unknown protein; Has 1807 Blast hits to 1807 proteins in 277 species: Archae - 0; Bacteria - 0;                                                                                                   |

|       |       |       |       |            |           |                                                                                                                                                                                                                                                                                                                                                                                                                                                                                                                                                                                                               |
|-------|-------|-------|-------|------------|-----------|---------------------------------------------------------------------------------------------------------------------------------------------------------------------------------------------------------------------------------------------------------------------------------------------------------------------------------------------------------------------------------------------------------------------------------------------------------------------------------------------------------------------------------------------------------------------------------------------------------------|
|       |       |       |       |            |           | Metazoa - 736; Fungi - 347; Plants - 385; Viruses - 0; Other Eukaryotes - 339 (source: NCBI BLink).                                                                                                                                                                                                                                                                                                                                                                                                                                                                                                           |
| -2.11 | 9.13  | -1.08 | 9.67  | 0.00479701 | AT5G34790 | BEST Arabidopsis thaliana protein match is: 18S pre-ribosomal assembly protein gar2-related (TAIR:AT2G03810.4); Has 3688 Blast hits to 1629 proteins in 255 species: Archae - 22; Bacteria - 222; Metazoa - 684; Fungi - 292; Plants - 62; Viruses - 14; Other Eukaryotes - 2392 (source: NCBI BLink). BEST Arabidopsis thaliana protein match is: 18S pre-ribosomal assembly protein gar2-related (TAIR:AT2G03810.4); Has 3688 Blast hits to 1629 proteins in 255 species: Archae - 22; Bacteria - 222; Metazoa - 684; Fungi - 292; Plants - 62; Viruses - 14; Other Eukaryotes - 2392 (source: NCBI BLink). |
| -2.12 | 14.01 | -1.08 | 14.55 | 0.00753361 | AT1G13650 | ATECB2_ECB2_VAC1__Tetratricopeptide repeat (TPR)-like superfamily protein                                                                                                                                                                                                                                                                                                                                                                                                                                                                                                                                     |
| -2.12 | 12.43 | -1.08 | 12.97 | 0.01025493 | AT1G15510 | Tetratricopeptide repeat (TPR)-like superfamily protein                                                                                                                                                                                                                                                                                                                                                                                                                                                                                                                                                       |
| -2.12 | 10.96 | -1.09 | 11.5  | 0.01229243 | AT1G43590 | SCPL13__serine carboxypeptidase-like 13 SCPL13__serine carboxypeptidase-like 13                                                                                                                                                                                                                                                                                                                                                                                                                                                                                                                               |
| -2.12 | 11.14 | -1.09 | 11.68 | 0.01499456 | AT1G77230 | CRR4__Pentatricopeptide repeat (PPR) superfamily protein                                                                                                                                                                                                                                                                                                                                                                                                                                                                                                                                                      |
| -2.12 | 13.14 | -1.09 | 13.68 | 0.00439438 | AT2G22980 | Concanavalin A-like lectin protein kinase family protein                                                                                                                                                                                                                                                                                                                                                                                                                                                                                                                                                      |
| -2.12 | 11.31 | -1.08 | 11.85 | 0.02266799 | AT2G45350 | ASE2_ATASE2_ATPURF2_CIA1__GLN phosphoribosyl pyrophosphate amidotransferase 2                                                                                                                                                                                                                                                                                                                                                                                                                                                                                                                                 |
| -2.12 | 13.25 | -1.08 | 13.79 | 0.00532052 | AT4G02420 | Rubisco methyltransferase family protein                                                                                                                                                                                                                                                                                                                                                                                                                                                                                                                                                                      |
| -2.12 | 12.09 | -1.08 | 12.63 | 0.00494369 | AT4G12917 | F-box/RNI-like/FBD-like domains-containing protein                                                                                                                                                                                                                                                                                                                                                                                                                                                                                                                                                            |
| -2.12 | 9.88  | -1.09 | 10.43 | 0.03482313 | AT4G34740 | BEST Arabidopsis thaliana protein match is: disease resistance protein (TIR-NBS-LRR class) family (TAIR:AT5G46260.1); Has 1807 Blast hits to 1807 proteins in 277 species: Archae - 0; Bacteria - 0; Metazoa - 736; Fungi - 347; Plants - 385; Viruses - 0; Other Eukaryotes - 339 (source: NCBI BLink).                                                                                                                                                                                                                                                                                                      |
| -2.12 | 8.75  | -1.08 | 9.29  | 0.01922232 | AT5G14260 | unknown protein; FUNCTIONS IN: molecular_function unknown; INVOLVED IN: biological_process unknown; LOCATED IN: endomembrane system; Has 45 Blast hits to 45 proteins in 13 species: Archae - 0; Bacteria - 2; Metazoa - 6; Fungi - 0; Plants - 8; Viruses - 0; Other Eukaryotes - 29 (source: NCBI BLink).                                                                                                                                                                                                                                                                                                   |
| -2.12 | 8.86  | -1.08 | 9.4   | 0.0106426  | AT5G44980 | CER6_CUT1_G2_KCS6_POPI__3-ketoacyl-CoA synthase 6                                                                                                                                                                                                                                                                                                                                                                                                                                                                                                                                                             |
| -2.12 | 13.05 | -1.08 | 13.59 | 0.00339076 | AT5G46500 | agenet domain-containing protein / bromo-adjacent homology (BAH) domain-containing protein                                                                                                                                                                                                                                                                                                                                                                                                                                                                                                                    |
| -2.13 | 6.91  | -1.09 | 7.45  | 0.00422741 | AT1G62935 | Leucine-rich repeat (LRR) family protein                                                                                                                                                                                                                                                                                                                                                                                                                                                                                                                                                                      |
| -2.13 | 12.4  | -1.09 | 12.95 | 0.00488717 | AT1G68530 | beta-1,4-N-acetylglucosaminyltransferase family protein                                                                                                                                                                                                                                                                                                                                                                                                                                                                                                                                                       |
| -2.13 | 8.6   | -1.09 | 9.15  | 0.01160115 | AT1G68580 | AtRLP43_RLP43__receptor like protein 43                                                                                                                                                                                                                                                                                                                                                                                                                                                                                                                                                                       |
| -2.13 | 7.51  | -1.09 | 8.05  | 0.01011114 | AT3G04717 | DNA photolyases;DNA photolyases                                                                                                                                                                                                                                                                                                                                                                                                                                                                                                                                                                               |
| -2.13 | 13.19 | -1.09 | 13.74 | 0.00610922 | AT3G24480 | KAT1__potassium channel in Arabidopsis thaliana 1                                                                                                                                                                                                                                                                                                                                                                                                                                                                                                                                                             |
| -2.13 | 12.95 | -1.09 | 13.49 | 0.00592108 | AT3G27540 |                                                                                                                                                                                                                                                                                                                                                                                                                                                                                                                                                                                                               |
| -2.13 | 7.12  | -1.09 | 7.67  | 0.03252261 | AT3G28890 |                                                                                                                                                                                                                                                                                                                                                                                                                                                                                                                                                                                                               |
| -2.13 | 14.18 | -1.09 | 14.72 | 0.00508871 | AT4G25290 |                                                                                                                                                                                                                                                                                                                                                                                                                                                                                                                                                                                                               |
| -2.13 | 12.87 | -1.09 | 13.42 | 0.00571104 | AT5G46240 |                                                                                                                                                                                                                                                                                                                                                                                                                                                                                                                                                                                                               |

|       |       |       |       |            |           |                                                                                                                                                                                                                                                                                                                                                                                    |
|-------|-------|-------|-------|------------|-----------|------------------------------------------------------------------------------------------------------------------------------------------------------------------------------------------------------------------------------------------------------------------------------------------------------------------------------------------------------------------------------------|
| -2.13 | 9.81  | -1.09 | 10.35 | 0.03492906 | AT5G60910 | AGL8_FUL__AGAMOUS-like 8                                                                                                                                                                                                                                                                                                                                                           |
| -2.14 | 8.59  | -1.1  | 9.14  | 0.01595663 | AT1G55800 | Domain of unknown function (DUF2431)                                                                                                                                                                                                                                                                                                                                               |
| -2.14 | 7.37  | -1.09 | 7.92  | 0.00796998 | AT1G78710 | TBL42__TRICHOME BIREFRINGENCE-LIKE 42<br>unknown protein; FUNCTIONS IN: molecular_function unknown; INVOLVED IN: biological_process unknown; LOCATED IN: cellular_component unknown; Has 30201 Blast hits to 17322 proteins in 780 species: Archae - 12; Bacteria - 1396; Metazoa - 17338; Fungi - 3422; Plants - 5037; Viruses - 0; Other Eukaryotes - 2996 (source: NCBI BLink). |
| -2.14 | 11.63 | -1.1  | 12.18 | 0.04799243 | AT3G05936 | unknown protein; FUNCTIONS IN: molecular_function unknown; INVOLVED IN: biological_process unknown; LOCATED IN: cellular_component unknown; Has 0 Blast hits to 0 proteins in 0 species (source: NCBI BLink).                                                                                                                                                                      |
| -2.14 | 9.11  | -1.1  | 9.66  | 0.0070566  | AT3G13404 | Leucine-rich repeat (LRR) family protein                                                                                                                                                                                                                                                                                                                                           |
| -2.14 | 13.72 | -1.1  | 14.27 | 0.00302324 | AT3G17640 | PEX11B__peroxin 11B                                                                                                                                                                                                                                                                                                                                                                |
| -2.14 | 13.69 | -1.1  | 14.24 | 0.01093028 | AT3G47430 | S-adenosyl-L-methionine-dependent methyltransferases superfamily protein                                                                                                                                                                                                                                                                                                           |
| -2.14 | 9.52  | -1.1  | 10.07 | 0.00769902 | AT3G51070 | Protein of unknown function (DUF1624) Protein of unknown function (DUF1624) Protein of unknown function (DUF1624)                                                                                                                                                                                                                                                                  |
| -2.14 | 12.91 | -1.1  | 13.46 | 0.00637266 | AT5G47900 | TCP family transcription factor                                                                                                                                                                                                                                                                                                                                                    |
| -2.14 | 9.05  | -1.1  | 9.6   | 0.00603083 | AT5G51910 | GATA21_GNC__GATA type zinc finger transcription factor family protein                                                                                                                                                                                                                                                                                                              |
| -2.14 | 13.35 | -1.1  | 13.89 | 0.0069202  | AT5G56860 | unknown protein; Has 5 Blast hits to 5 proteins in 2 species: Archae - 0; Bacteria - 0; Metazoa - 0; Fungi - 0; Plants - 5; Viruses - 0; Other Eukaryotes - 0 (source: NCBI BLink).                                                                                                                                                                                                |
| -2.15 | 8.38  | -1.1  | 8.93  | 0.01711614 | AT1G30250 | ATBCA4_BCA4_CA4__beta carbonic anhydrase 4 ATBCA4_BCA4_CA4__beta carbonic anhydrase 4                                                                                                                                                                                                                                                                                              |
| -2.15 | 14.21 | -1.11 | 14.76 | 0.00459015 | AT1G70410 | PIP5K5__phosphatidylinositol- 4-phosphate 5-kinase 5                                                                                                                                                                                                                                                                                                                               |
| -2.15 | 12.15 | -1.11 | 12.7  | 0.00438643 | AT2G41210 | nodulin MtN21 /EamA-like transporter family protein nodulin MtN21 /EamA-like transporter family protein                                                                                                                                                                                                                                                                            |
| -2.15 | 11.08 | -1.11 | 11.63 | 0.00294186 | AT3G28080 | Tetratricopeptide repeat (TPR)-like superfamily protein                                                                                                                                                                                                                                                                                                                            |
| -2.15 | 10.49 | -1.11 | 11.05 | 0.00356968 | AT3G53170 | GIS__C2H2 and C2HC zinc fingers superfamily protein                                                                                                                                                                                                                                                                                                                                |
| -2.15 | 11.2  | -1.1  | 11.75 | 0.00655859 | AT3G58070 | Protein of unknown function, DUF593                                                                                                                                                                                                                                                                                                                                                |
| -2.16 | 9.09  | -1.11 | 9.65  | 0.01144885 | AT1G18990 | Protein of unknown function, DUF547                                                                                                                                                                                                                                                                                                                                                |
| -2.16 | 12.79 | -1.11 | 13.35 | 0.0078464  | AT1G21060 | AtMYB20_MYB20__myb domain protein 20                                                                                                                                                                                                                                                                                                                                               |
| -2.16 | 12.3  | -1.11 | 12.86 | 0.00614592 | AT1G66230 | ATUPS4_UPS4__ureide permease 4                                                                                                                                                                                                                                                                                                                                                     |
| -2.16 | 8.72  | -1.11 | 9.27  | 0.00927499 | AT2G03520 | TRAF-like family protein                                                                                                                                                                                                                                                                                                                                                           |
| -2.16 | 11.41 | -1.11 | 11.97 | 0.01608511 | AT2G32490 | RING/U-box superfamily protein                                                                                                                                                                                                                                                                                                                                                     |
| -2.16 | 13.89 | -1.11 | 14.45 | 0.003464   | AT2G32880 | S-adenosyl-L-methionine-dependent methyltransferases superfamily protein                                                                                                                                                                                                                                                                                                           |
| -2.16 | 9.64  | -1.11 | 10.2  | 0.00787677 | AT2G38185 | PLIM2a__GATA type zinc finger transcription factor family protein PLIM2a__GATA type zinc finger transcription factor family protein                                                                                                                                                                                                                                                |
| -2.16 | 13.71 | -1.11 | 14.26 | 0.00781333 | AT2G41040 |                                                                                                                                                                                                                                                                                                                                                                                    |
| -2.16 | 9.49  | -1.11 | 10.04 | 0.00394474 | AT2G45800 |                                                                                                                                                                                                                                                                                                                                                                                    |

|       |       |       |       |            |           |                                                                                                                                                                                                                                                                                                                                                 |
|-------|-------|-------|-------|------------|-----------|-------------------------------------------------------------------------------------------------------------------------------------------------------------------------------------------------------------------------------------------------------------------------------------------------------------------------------------------------|
| -2.16 | 10.62 | -1.11 | 11.17 | 0.00978611 | AT3G27860 | Tudor/PWWP/MBT superfamily protein                                                                                                                                                                                                                                                                                                              |
| -2.16 | 13.27 | -1.11 | 13.83 | 0.00882166 | AT4G32980 | ATH1__homeobox gene 1                                                                                                                                                                                                                                                                                                                           |
| -2.16 | 12.44 | -1.11 | 12.99 | 0.00974823 | AT4G36870 | BLH2_SAW1__BEL1-like homeodomain 2                                                                                                                                                                                                                                                                                                              |
| -2.16 | 12.67 | -1.11 | 13.23 | 0.00309366 | AT5G03260 | LAC11__laccase 11                                                                                                                                                                                                                                                                                                                               |
| -2.16 | 8.48  | -1.11 | 9.04  | 0.00565467 | AT5G59760 | Protein of unknown function (DUF1635)                                                                                                                                                                                                                                                                                                           |
| -2.16 | 13.24 | -1.11 | 13.79 | 0.00417125 | AT5G61270 | PIF7__phytochrome-interacting factor7 PIF7__phytochrome-interacting factor7                                                                                                                                                                                                                                                                     |
| -2.17 | 9.67  | -1.12 | 10.23 | 0.00428727 | AT1G10155 | ATPP2-A10_PP2-A10__phloem protein 2-A10                                                                                                                                                                                                                                                                                                         |
| -2.17 | 10.54 | -1.12 | 11.1  | 0.00760062 | AT1G15165 | RING/FYVE/PHD zinc finger superfamily protein                                                                                                                                                                                                                                                                                                   |
| -2.17 | 12.4  | -1.12 | 12.96 | 0.00873067 | AT1G28230 | ATPUP1_PUP1__purine permease 1                                                                                                                                                                                                                                                                                                                  |
| -2.17 | 8.94  | -1.12 | 9.5   | 0.01371693 | AT1G49370 |                                                                                                                                                                                                                                                                                                                                                 |
| -2.17 | 12.15 | -1.12 | 12.71 | 0.0029534  | AT1G75380 | ATBBD1_BBD1__bifunctional nuclease in basal defense response 1                                                                                                                                                                                                                                                                                  |
| -2.17 | 12.94 | -1.12 | 13.5  | 0.00680864 | AT3G14810 | MSL5__mechanosensitive channel of small conductance-like 5                                                                                                                                                                                                                                                                                      |
| -2.17 | 12.66 | -1.12 | 13.22 | 0.02140313 | AT3G19850 | Phototropic-responsive NPH3 family protein                                                                                                                                                                                                                                                                                                      |
| -2.17 | 11.07 | -1.12 | 11.63 | 0.00664061 | AT3G20200 | Protein kinase protein with adenine nucleotide alpha hydrolases-like domain                                                                                                                                                                                                                                                                     |
| -2.17 | 11.63 | -1.12 | 12.19 | 0.02536149 | AT3G29670 | PMAT2__HXXXD-type acyl-transferase family protein                                                                                                                                                                                                                                                                                               |
| -2.17 | 13.89 | -1.12 | 14.45 | 0.00581265 | AT3G48320 | CYP71A21__cytochrome P450, family 71, subfamily A, polypeptide 21                                                                                                                                                                                                                                                                               |
| -2.17 | 8.9   | -1.11 | 9.45  | 0.036036   | AT3G49480 | Protein with RNI-like/FBD-like domains                                                                                                                                                                                                                                                                                                          |
| -2.17 | 8.81  | -1.12 | 9.37  | 0.00473458 | AT4G09920 | FBD, F-box and Leucine Rich Repeat domains containing protein<br>BEST Arabidopsis thaliana protein match is: Telomerase activating protein Est1<br>(TAIR:AT1G28260.2); Has 20 Blast hits to 20 proteins in 2 species: Archae - 0; Bacteria - 0;<br>Metazoa - 0; Fungi - 0; Plants - 20; Viruses - 0; Other Eukaryotes - 0 (source: NCBI BLink). |
| -2.17 | 7.98  | -1.12 | 8.53  | 0.00478534 | AT5G02650 | Oleosin family protein                                                                                                                                                                                                                                                                                                                          |
| -2.17 | 7.71  | -1.12 | 8.26  | 0.01635632 | AT5G07600 | Pollen Ole e 1 allergen and extensin family protein                                                                                                                                                                                                                                                                                             |
| -2.17 | 12.67 | -1.11 | 13.23 | 0.00438828 | AT5G41050 | Plant protein of unknown function (DUF828) with plant pleckstrin homology-like region                                                                                                                                                                                                                                                           |
| -2.17 | 12.56 | -1.12 | 13.12 | 0.00411275 | AT5G43870 | ATPUB54_PUB54__plant U-box 54                                                                                                                                                                                                                                                                                                                   |
| -2.18 | 9.26  | -1.12 | 9.82  | 0.04126741 | AT1G01680 | Tetratricopeptide repeat (TPR)-like superfamily protein                                                                                                                                                                                                                                                                                         |
| -2.18 | 10.64 | -1.12 | 11.2  | 0.00422741 | AT1G31790 | NDF5__NDH-dependent cyclic electron flow 5                                                                                                                                                                                                                                                                                                      |
| -2.18 | 9.21  | -1.12 | 9.77  | 0.00610609 | AT1G55370 | Disease resistance protein (CC-NBS-LRR class) family                                                                                                                                                                                                                                                                                            |
| -2.18 | 13.7  | -1.13 | 14.26 | 0.00266801 | AT1G62630 |                                                                                                                                                                                                                                                                                                                                                 |
| -2.18 | 12.18 | -1.13 | 12.74 | 0.01879782 | AT2G24160 |                                                                                                                                                                                                                                                                                                                                                 |
| -2.18 | 11.57 | -1.12 | 12.13 | 0.00251625 | AT4G01650 | Polyketide cyclase / dehydrase and lipid transport protein                                                                                                                                                                                                                                                                                      |
| -2.18 | 14.12 | -1.13 | 14.69 | 0.003464   | AT4G09350 | CRRJ_NdhT__Chaperone DnaJ-domain superfamily protein                                                                                                                                                                                                                                                                                            |
| -2.18 | 12.39 | -1.12 | 12.95 | 0.03515165 | AT5G47330 | alpha/beta-Hydrolases superfamily protein                                                                                                                                                                                                                                                                                                       |
| -2.18 | 13.37 | -1.12 | 13.94 | 0.00549226 | AT5G64380 | Inositol monophosphatase family protein                                                                                                                                                                                                                                                                                                         |
| -2.19 | 9.54  | -1.13 | 10.11 | 0.00511666 | AT1G77992 |                                                                                                                                                                                                                                                                                                                                                 |
| -2.19 | 13.25 | -1.13 | 13.81 | 0.01267872 | AT2G40520 | Nucleotidyltransferase family protein                                                                                                                                                                                                                                                                                                           |
| -2.19 | 8.27  | -1.13 | 8.84  | 0.00973078 | AT2G47670 | Plant invertase/pectin methylesterase inhibitor superfamily protein                                                                                                                                                                                                                                                                             |

|       |       |       |       |            |           |                                                                                                                                                                                                                                                                                                                                                                                                                                                                                          |
|-------|-------|-------|-------|------------|-----------|------------------------------------------------------------------------------------------------------------------------------------------------------------------------------------------------------------------------------------------------------------------------------------------------------------------------------------------------------------------------------------------------------------------------------------------------------------------------------------------|
| -2.19 | 9.21  | -1.13 | 9.78  | 0.00219513 | AT3G20865 | AGP40__arabinogalactan protein 40                                                                                                                                                                                                                                                                                                                                                                                                                                                        |
| -2.19 | 13.41 | -1.13 | 13.98 | 0.01666891 | AT3G46670 | UGT76E11__UDP-glucosyl transferase 76E11<br>unknown protein; Has 30201 Blast hits to 17322 proteins in 780 species: Archae - 12; Bacteria - 1396; Metazoa - 17338; Fungi - 3422; Plants - 5037; Viruses - 0; Other Eukaryotes - 2996 (source: NCBI BLink).                                                                                                                                                                                                                               |
| -2.19 | 10.62 | -1.13 | 11.19 | 0.003464   | AT4G05631 | NCBI BLink).                                                                                                                                                                                                                                                                                                                                                                                                                                                                             |
| -2.19 | 10.61 | -1.13 | 11.17 | 0.00833976 | AT5G19140 | AILP1__ATAILP1__Aluminium induced protein with YGL and LRDR motifs<br>unknown protein; FUNCTIONS IN: molecular_function unknown; INVOLVED IN: biological_process unknown; LOCATED IN: endomembrane system; BEST Arabidopsis thaliana protein match is: unknown protein (TAIR:AT5G28910.2); Has 30201 Blast hits to 17322 proteins in 780 species: Archae - 12; Bacteria - 1396; Metazoa - 17338; Fungi - 3422; Plants - 5037; Viruses - 0; Other Eukaryotes - 2996 (source: NCBI BLink). |
| -2.19 | 10.07 | -1.13 | 10.63 | 0.01671447 | AT5G28960 | Viruses - 0; Other Eukaryotes - 2996 (source: NCBI BLink).<br>unknown protein; FUNCTIONS IN: molecular_function unknown; INVOLVED IN: biological_process unknown; LOCATED IN: endomembrane system; BEST Arabidopsis thaliana protein match is: unknown protein (TAIR:AT1G24148.1); Has 4 Blast hits to 4 proteins in 2 species: Archae - 0; Bacteria - 0; Metazoa - 0; Fungi - 0; Plants - 4; Viruses - 0; Other Eukaryotes - 0 (source: NCBI BLink).                                    |
| -2.2  | 12.29 | -1.14 | 12.85 | 0.00449194 | AT1G24147 | Haloacid dehalogenase-like hydrolase (HAD) superfamily protein                                                                                                                                                                                                                                                                                                                                                                                                                           |
| -2.2  | 8.93  | -1.14 | 9.5   | 0.00309366 | AT1G29780 | 4CL.1_4CL1__4-coumarate:CoA ligase 1                                                                                                                                                                                                                                                                                                                                                                                                                                                     |
| -2.2  | 7.68  | -1.14 | 8.25  | 0.00507483 | AT1G51680 | ATP-dependent protease La (LON) domain protein                                                                                                                                                                                                                                                                                                                                                                                                                                           |
| -2.2  | 13.1  | -1.14 | 13.66 | 0.02139563 | AT1G75460 | AXY4L_TBL22__TRICHOME BIREFRINGENCE-LIKE 22                                                                                                                                                                                                                                                                                                                                                                                                                                              |
| -2.2  | 11.23 | -1.14 | 11.8  | 0.00664061 | AT3G28150 | alpha/beta-Hydrolases superfamily protein                                                                                                                                                                                                                                                                                                                                                                                                                                                |
| -2.2  | 11.24 | -1.13 | 11.81 | 0.0177665  | AT5G15845 | AtCDC20.3_CDC20.3__Transducin family protein / WD-40 repeat family protein                                                                                                                                                                                                                                                                                                                                                                                                               |
| -2.2  | 13.48 | -1.14 | 14.05 | 0.01239929 | AT5G19850 | LUC7 N_terminus domain-containing protein                                                                                                                                                                                                                                                                                                                                                                                                                                                |
| -2.2  | 7.6   | -1.13 | 8.17  | 0.0201658  | AT5G27080 | UGT72B3__UDP-glucosyl transferase 72B3                                                                                                                                                                                                                                                                                                                                                                                                                                                   |
| -2.2  | 11.47 | -1.14 | 12.04 | 0.01786402 | AT5G51410 | Cysteine proteinases superfamily protein                                                                                                                                                                                                                                                                                                                                                                                                                                                 |
| -2.21 | 11.64 | -1.14 | 12.21 | 0.00663139 | AT1G01420 | PAS domain-containing protein tyrosine kinase family protein                                                                                                                                                                                                                                                                                                                                                                                                                             |
| -2.21 | 10.32 | -1.14 | 10.89 | 0.0126018  | AT1G29110 | ATCSLB04_ATCSLB4_CSLB04_CSLB04__cellulose synthase-like B4                                                                                                                                                                                                                                                                                                                                                                                                                               |
| -2.21 | 10.34 | -1.15 | 10.91 | 0.01488948 | AT1G67890 | CAT5__cationic amino acid transporter 5                                                                                                                                                                                                                                                                                                                                                                                                                                                  |
| -2.21 | 14.66 | -1.15 | 15.23 | 0.00442816 | AT2G32540 | ATMYOS3_ATXIJ_MYA3_XI-16_XIJ__P-loop containing nucleoside triphosphate hydrolases superfamily protein                                                                                                                                                                                                                                                                                                                                                                                   |
| -2.21 | 12.33 | -1.15 | 12.9  | 0.00306866 | AT2G34960 | CDC68-related                                                                                                                                                                                                                                                                                                                                                                                                                                                                            |
| -2.21 | 11.32 | -1.14 | 11.89 | 0.0039427  | AT3G58160 | P-loop containing nucleoside triphosphate hydrolases superfamily protein                                                                                                                                                                                                                                                                                                                                                                                                                 |
| -2.21 | 7.73  | -1.14 | 8.3   | 0.00514085 | AT4G10695 | CYCT1;2__Cyclin family protein                                                                                                                                                                                                                                                                                                                                                                                                                                                           |
| -2.21 | 11.54 | -1.14 | 12.11 | 0.00873067 | AT4G16680 | CRK23__cysteine-rich RLK (RECEPTOR-like protein kinase) 23                                                                                                                                                                                                                                                                                                                                                                                                                               |
| -2.21 | 10.25 | -1.15 | 10.82 | 0.00356968 | AT4G19560 | Phototropic-responsive NPH3 family protein                                                                                                                                                                                                                                                                                                                                                                                                                                               |
| -2.21 | 9.85  | -1.14 | 10.42 | 0.0204015  | AT4G23310 |                                                                                                                                                                                                                                                                                                                                                                                                                                                                                          |
| -2.21 | 10    | -1.14 | 10.57 | 0.00886775 | AT5G17580 |                                                                                                                                                                                                                                                                                                                                                                                                                                                                                          |

|       |       |       |       |            |           |                                                                                                                                                                                                                                                             |
|-------|-------|-------|-------|------------|-----------|-------------------------------------------------------------------------------------------------------------------------------------------------------------------------------------------------------------------------------------------------------------|
| -2.21 | 12.66 | -1.15 | 13.23 | 0.01177152 | AT5G65890 | ACR1__ACT domain repeat 1 ACR1__ACT domain repeat 1                                                                                                                                                                                                         |
| -2.22 | 9.56  | -1.15 | 10.13 | 0.00294186 | AT1G13220 | CRWN2_LINC2__nuclear matrix constituent protein-related                                                                                                                                                                                                     |
| -2.22 | 11.99 | -1.15 | 12.56 | 0.00309366 | AT1G21580 | Zinc finger C-x8-C-x5-C-x3-H type family protein                                                                                                                                                                                                            |
| -2.22 | 12.9  | -1.15 | 13.48 | 0.00322354 | AT1G26230 | Cpn60beta4__TCP-1/cpn60 chaperonin family protein                                                                                                                                                                                                           |
| -2.22 | 11.34 | -1.15 | 11.91 | 0.00426996 | AT1G31300 | TRAM, LAG1 and CLN8 (TLC) lipid-sensing domain containing protein                                                                                                                                                                                           |
| -2.22 | 13.24 | -1.15 | 13.82 | 0.01571536 | AT1G53870 | Protein of unknown function (DUF567) Protein of unknown function (DUF567)                                                                                                                                                                                   |
| -2.22 | 11.91 | -1.15 | 12.48 | 0.00535046 | AT1G73700 | MATE efflux family protein                                                                                                                                                                                                                                  |
| -2.22 | 12.32 | -1.15 | 12.89 | 0.00709926 | AT2G18560 | UDP-Glycosyltransferase superfamily protein                                                                                                                                                                                                                 |
| -2.22 | 12.02 | -1.15 | 12.6  | 0.00499347 | AT2G38460 | ATIREG1_FPN1_IREG1__iron regulated 1                                                                                                                                                                                                                        |
| -2.22 | 7.75  | -1.15 | 8.32  | 0.01559265 | AT3G05930 | GLP8__germin-like protein 8                                                                                                                                                                                                                                 |
| -2.22 | 9.46  | -1.15 | 10.04 | 0.04646494 | AT3G06125 | nodulin MtN21 /EamA-like transporter family protein nodulin MtN21 /EamA-like transporter family protein                                                                                                                                                     |
| -2.22 | 11.73 | -1.15 | 12.3  | 0.00309366 | AT3G28080 | family protein                                                                                                                                                                                                                                              |
| -2.22 | 12.24 | -1.15 | 12.82 | 0.019243   | AT3G50560 | NAD(P)-binding Rossmann-fold superfamily protein                                                                                                                                                                                                            |
| -2.22 | 9.08  | -1.15 | 9.66  | 0.0062393  | AT4G05000 | VPS28-1_VPS28-2__Vacuolar protein sorting-associated protein VPS28 family protein                                                                                                                                                                           |
| -2.22 | 12.7  | -1.15 | 13.27 | 0.00403113 | AT4G24810 | Protein kinase superfamily protein                                                                                                                                                                                                                          |
| -2.22 | 8.64  | -1.15 | 9.22  | 0.04778423 | AT4G28280 | LLG3__LORELEI-LIKE-GPI ANCHORED PROTEIN 3<br>unknown protein; Has 30201 Blast hits to 17322 proteins in 780 species: Archae - 12; Bacteria - 1396; Metazoa - 17338; Fungi - 3422; Plants - 5037; Viruses - 0; Other Eukaryotes - 2996 (source: NCBI BLINK). |
| -2.22 | 10.31 | -1.15 | 10.89 | 0.01171532 | AT5G15254 | NCBI BLINK).                                                                                                                                                                                                                                                |
| -2.22 | 10.65 | -1.15 | 11.23 | 0.01673621 | AT5G26742 | emb1138__DEAD box RNA helicase (RH3)                                                                                                                                                                                                                        |
| -2.23 | 13.27 | -1.16 | 13.85 | 0.00329522 | AT1G66910 | Protein kinase superfamily protein                                                                                                                                                                                                                          |
| -2.23 | 13.53 | -1.16 | 14.1  | 0.00486057 | AT1G73870 | BBX16_B-box type zinc finger protein with CCT domain                                                                                                                                                                                                        |
| -2.23 | 8.2   | -1.16 | 8.77  | 0.03762207 | AT3G21500 | DXPS1__1-deoxy-D-xylulose 5-phosphate synthase 1 DXPS1__1-deoxy-D-xylulose 5-phosphate synthase 1                                                                                                                                                           |
| -2.23 | 11.68 | -1.16 | 12.26 | 0.00836735 | AT3G63370 | OTP86__Tetratricopeptide repeat (TPR)-like superfamily protein                                                                                                                                                                                              |
| -2.24 | 12.83 | -1.16 | 13.41 | 0.01391174 | AT1G16730 | UP6__unknown protein 6                                                                                                                                                                                                                                      |
| -2.24 | 8.2   | -1.16 | 8.78  | 0.01001532 | AT1G51490 | BGLU36__beta glucosidase 36                                                                                                                                                                                                                                 |
| -2.24 | 11.26 | -1.16 | 11.85 | 0.01740623 | AT1G52942 | unknown protein; Has 74 Blast hits to 71 proteins in 15 species: Archae - 0; Bacteria - 4; Metazoa - 4; Fungi - 0; Plants - 54; Viruses - 0; Other Eukaryotes - 12 (source: NCBI BLINK).                                                                    |
| -2.24 | 10.72 | -1.16 | 11.3  | 0.00778833 | AT1G75360 | - 4; Fungi - 0; Plants - 54; Viruses - 0; Other Eukaryotes - 12 (source: NCBI BLINK).                                                                                                                                                                       |
| -2.24 | 7.95  | -1.16 | 8.54  | 0.00294186 | AT2G05518 | FUNCTIONS IN: molecular_function unknown; INVOLVED IN: biological_process unknown;                                                                                                                                                                          |
| -2.24 | 12.64 | -1.16 | 13.22 | 0.00294186 | AT2G17695 | CONTAINS InterPro DOMAIN/s: Domain of unknown function DUF1990 (InterPro:IPR018960).                                                                                                                                                                        |
| -2.24 | 12.18 | -1.17 | 12.77 | 0.0103816  | AT2G32640 | Lycopene beta/epsilon cyclase protein                                                                                                                                                                                                                       |
| -2.24 | 12.73 | -1.16 | 13.31 | 0.01048515 | AT3G47580 | Leucine-rich repeat protein kinase family protein                                                                                                                                                                                                           |

|       |       |       |       |            |           |                                                                                                                                                                                                                                                                                                                                                                                                               |
|-------|-------|-------|-------|------------|-----------|---------------------------------------------------------------------------------------------------------------------------------------------------------------------------------------------------------------------------------------------------------------------------------------------------------------------------------------------------------------------------------------------------------------|
| -2.24 | 12.99 | -1.17 | 13.57 | 0.00961332 | AT3G53310 | AP2/B3-like transcriptional factor family protein                                                                                                                                                                                                                                                                                                                                                             |
| -2.24 | 11.21 | -1.16 | 11.79 | 0.00518233 | AT4G24040 | ATTRE1_TRE1__trehalase 1                                                                                                                                                                                                                                                                                                                                                                                      |
| -2.24 | 8.88  | -1.16 | 9.46  | 0.03172961 | AT5G04210 | CCCH-type zinc fingerfamily protein with RNA-binding domain                                                                                                                                                                                                                                                                                                                                                   |
| -2.24 | 12.2  | -1.16 | 12.78 | 0.00497286 | AT5G39030 | Protein kinase superfamily protein<br>FUNCTIONS IN: molecular_function unknown; INVOLVED IN: biological_process unknown;<br>LOCATED IN: endomembrane system; BEST Arabidopsis thaliana protein match is: tapetum<br>determinant 1 (TAIR:AT4G24972.1); Has 35333 Blast hits to 34131 proteins in 2444 species:<br>Archae - 798; Bacteria - 22429; Metazoa - 974; Fungi - 991; Plants - 531; Viruses - 0; Other |
| -2.25 | 8.64  | -1.17 | 9.22  | 0.00543099 | AT1G32583 | Eukaryotes - 9610 (source: NCBI BLink).                                                                                                                                                                                                                                                                                                                                                                       |
| -2.25 | 8.08  | -1.17 | 8.66  | 0.00516629 | AT1G73965 | CLE13__CLAVATA3/ESR-RELATED 13                                                                                                                                                                                                                                                                                                                                                                                |
| -2.25 | 8.64  | -1.17 | 9.23  | 0.00507786 | AT2G03410 | Mo25 family protein                                                                                                                                                                                                                                                                                                                                                                                           |
| -2.25 | 9.53  | -1.17 | 10.11 | 0.02998937 | AT2G17780 | MCA2__PLAC8 family protein                                                                                                                                                                                                                                                                                                                                                                                    |
| -2.25 | 12.86 | -1.17 | 13.44 | 0.00435164 | AT3G56630 | CYP94D2__cytochrome P450, family 94, subfamily D, polypeptide 2                                                                                                                                                                                                                                                                                                                                               |
| -2.25 | 12.83 | -1.17 | 13.42 | 0.02357463 | AT4G00050 | UNE10__basic helix-loop-helix (bHLH) DNA-binding superfamily protein                                                                                                                                                                                                                                                                                                                                          |
| -2.25 | 10.47 | -1.17 | 11.06 | 0.00518233 | AT5G44490 | FBD, F-box, Skp2-like and Leucine Rich Repeat domains containing protein                                                                                                                                                                                                                                                                                                                                      |
| -2.26 | 13.37 | -1.18 | 13.96 | 0.00309366 | AT1G31920 | Tetratricopeptide repeat (TPR)-like superfamily protein                                                                                                                                                                                                                                                                                                                                                       |
| -2.26 | 11.19 | -1.18 | 11.78 | 0.00294186 | AT1G45545 | Plant protein of unknown function (DUF827)                                                                                                                                                                                                                                                                                                                                                                    |
| -2.26 | 12.5  | -1.18 | 13.09 | 0.01363319 | AT3G21760 | HYR1__UDP-Glycosyltransferase superfamily protein                                                                                                                                                                                                                                                                                                                                                             |
| -2.26 | 9.91  | -1.18 | 10.5  | 0.01927749 | AT3G47030 | F-box and associated interaction domains-containing protein                                                                                                                                                                                                                                                                                                                                                   |
| -2.26 | 12.36 | -1.17 | 12.95 | 0.00413041 | AT4G25280 | P-loop containing nucleoside triphosphate hydrolases superfamily protein                                                                                                                                                                                                                                                                                                                                      |
| -2.26 | 9.25  | -1.18 | 9.84  | 0.00963031 | AT5G23480 | SWIB/MDM2 domain;Plus-3;GYF                                                                                                                                                                                                                                                                                                                                                                                   |
| -2.26 | 11.44 | -1.17 | 12.03 | 0.04967263 | AT5G24200 | alpha/beta-Hydrolases superfamily protein                                                                                                                                                                                                                                                                                                                                                                     |
| -2.26 | 14.67 | -1.17 | 15.26 | 0.00251625 | AT5G49740 | ATFRO7_FRO7__ferric reduction oxidase 7                                                                                                                                                                                                                                                                                                                                                                       |
| -2.26 | 9.77  | -1.18 | 10.36 | 0.00394838 | AT5G57180 | CIA2__chloroplast import apparatus 2                                                                                                                                                                                                                                                                                                                                                                          |
| -2.27 | 10.91 | -1.18 | 11.5  | 0.00911009 | AT1G29610 | Leucine-rich repeat transmembrane protein kinase Leucine-rich repeat transmembrane protein<br>kinase                                                                                                                                                                                                                                                                                                          |
| -2.27 | 12.55 | -1.18 | 13.14 | 0.00338136 | AT1G29720 | kinase                                                                                                                                                                                                                                                                                                                                                                                                        |
| -2.27 | 11.77 | -1.18 | 12.36 | 0.011023   | AT2G23180 | CYP96A1__cytochrome P450, family 96, subfamily A, polypeptide 1                                                                                                                                                                                                                                                                                                                                               |
| -2.27 | 10.74 | -1.18 | 11.33 | 0.00394474 | AT2G31751 |                                                                                                                                                                                                                                                                                                                                                                                                               |
| -2.27 | 13.32 | -1.18 | 13.91 | 0.00633393 | AT3G09650 | CRM3_HCF152__Tetratricopeptide repeat (TPR)-like superfamily protein                                                                                                                                                                                                                                                                                                                                          |
| -2.27 | 10.66 | -1.18 | 11.25 | 0.00635475 | AT3G10420 | SPD1__P-loop containing nucleoside triphosphate hydrolases superfamily protein                                                                                                                                                                                                                                                                                                                                |
| -2.27 | 8.82  | -1.18 | 9.41  | 0.00561713 | AT4G05497 | RNI-like superfamily protein                                                                                                                                                                                                                                                                                                                                                                                  |
| -2.27 | 13.04 | -1.18 | 13.63 | 0.00663139 | AT4G25780 | CAP (Cysteine-rich secretory proteins, Antigen 5, and Pathogenesis-related 1 protein) superfamily<br>protein                                                                                                                                                                                                                                                                                                  |
| -2.27 | 8.67  | -1.19 | 9.26  | 0.0039802  | AT4G39420 | unknown protein; INVOLVED IN: biological_process unknown; LOCATED IN:<br>cellular_component unknown; EXPRESSED IN: leaf; EXPRESSED DURING: LP.04 four leaves                                                                                                                                                                                                                                                  |



|       |       |       |       |            |           |                                                                                                                                                                                                          |
|-------|-------|-------|-------|------------|-----------|----------------------------------------------------------------------------------------------------------------------------------------------------------------------------------------------------------|
|       |       |       |       |            |           | visible, LP.02 two leaves visible; Has 20 Blast hits to 19 proteins in 8 species: Archae - 0; Bacteria - 0; Metazoa - 0; Fungi - 0; Plants - 20; Viruses - 0; Other Eukaryotes - 0 (source: NCBI BLink). |
| -2.27 | 9.01  | -1.18 | 9.6   | 0.02406437 | AT5G38240 | Protein kinase family protein                                                                                                                                                                            |
| -2.28 | 8.55  | -1.19 | 9.14  | 0.01258171 | AT1G34580 | Major facilitator superfamily protein                                                                                                                                                                    |
| -2.28 | 13.7  | -1.19 | 14.3  | 0.00221781 | AT1G61300 | LRR and NB-ARC domains-containing disease resistance protein                                                                                                                                             |
| -2.28 | 8.1   | -1.19 | 8.69  | 0.01040772 | AT3G02310 | AGL4_SEP2__K-box region and MADS-box transcription factor family protein                                                                                                                                 |
| -2.28 | 12.09 | -1.19 | 12.69 | 0.01093028 | AT4G01030 | pentatricopeptide (PPR) repeat-containing protein                                                                                                                                                        |
| -2.28 | 10.56 | -1.19 | 11.16 | 0.0052996  | AT4G21940 | CPK15__calcium-dependent protein kinase 15                                                                                                                                                               |
| -2.28 | 13.82 | -1.19 | 14.41 | 0.00404197 | AT4G23260 | CRK18__cysteine-rich RLK (RECEPTOR-like protein kinase) 18                                                                                                                                               |
| -2.28 | 10.23 | -1.19 | 10.82 | 0.03348677 | AT5G03620 | Subtilisin-like serine endopeptidase family protein                                                                                                                                                      |
| -2.28 | 7.43  | -1.19 | 8.03  | 0.03874697 | AT5G35798 |                                                                                                                                                                                                          |
| -2.28 | 11.77 | -1.19 | 12.36 | 0.00356968 | AT5G45840 | Leucine-rich repeat protein kinase family protein                                                                                                                                                        |
| -2.28 | 9.04  | -1.19 | 9.63  | 0.00442816 | AT5G64490 | ARM repeat superfamily protein                                                                                                                                                                           |
| -2.28 | 13.57 | -1.19 | 14.16 | 0.0178121  | AT5G67370 | Protein of unknown function (DUF1230)                                                                                                                                                                    |
| -2.29 | 11.83 | -1.19 | 12.43 | 0.02424045 | AT1G21240 | WAK3__wall associated kinase 3                                                                                                                                                                           |
| -2.29 | 10.59 | -1.2  | 11.18 | 0.00459015 | AT1G29715 |                                                                                                                                                                                                          |
| -2.29 | 11.27 | -1.2  | 11.87 | 0.00738846 | AT2G18260 | ATSYP112_SYP112__syntaxin of plants 112                                                                                                                                                                  |
| -2.29 | 11.51 | -1.19 | 12.11 | 0.01637674 | AT4G38960 | BBX19_B-box type zinc finger family protein B-box type zinc finger family protein                                                                                                                        |
| -2.29 | 12.4  | -1.2  | 13    | 0.00470122 | AT5G08070 | TCP17__TCP domain protein 17                                                                                                                                                                             |
| -2.29 | 8.94  | -1.2  | 9.53  | 0.00266801 | AT5G34800 |                                                                                                                                                                                                          |
| -2.3  | 10.25 | -1.2  | 10.85 | 0.00520191 | AT1G26600 | CLE9__CLAVATA3/ESR-RELATED 9                                                                                                                                                                             |
| -2.3  | 7.91  | -1.2  | 8.51  | 0.03903368 | AT1G69570 | Dof-type zinc finger DNA-binding family protein                                                                                                                                                          |
| -2.3  | 12.47 | -1.2  | 13.08 | 0.00514085 | AT2G22980 | SCPL13__serine carboxypeptidase-like 13 SCPL13__serine carboxypeptidase-like 13                                                                                                                          |
| -2.3  | 10.31 | -1.2  | 10.92 | 0.00461339 | AT2G24010 | scpl23__serine carboxypeptidase-like 23                                                                                                                                                                  |
| -2.3  | 8.95  | -1.2  | 9.55  | 0.01263033 | AT3G14710 | RNI-like superfamily protein                                                                                                                                                                             |
| -2.3  | 7.94  | -1.2  | 8.54  | 0.00728048 | AT3G21500 | DXPS1__1-deoxy-D-xylulose 5-phosphate synthase 1 DXPS1__1-deoxy-D-xylulose 5-phosphate synthase 1                                                                                                        |
| -2.3  | 14.64 | -1.2  | 15.24 | 0.00398975 | AT3G26280 | CYP71B4__cytochrome P450, family 71, subfamily B, polypeptide 4                                                                                                                                          |
| -2.3  | 12.46 | -1.2  | 13.06 | 0.00693255 | AT4G21380 | ARK3_RK3__receptor kinase 3                                                                                                                                                                              |
| -2.3  | 12.9  | -1.2  | 13.5  | 0.01821024 | AT5G19580 | glyoxal oxidase-related protein                                                                                                                                                                          |
| -2.3  | 10.61 | -1.2  | 11.21 | 0.00905135 | AT5G37410 | Family of unknown function (DUF577)                                                                                                                                                                      |
| -2.3  | 12.62 | -1.2  | 13.22 | 0.00999044 | AT5G60970 | TCP5__TEOSINTE BRANCHED 1, cycloidea and PCF transcription factor 5                                                                                                                                      |
| -2.31 | 11.99 | -1.21 | 12.59 | 0.00999489 | AT1G31290 | AGO3__ARGONAUTE 3                                                                                                                                                                                        |
| -2.31 | 11.97 | -1.21 | 12.57 | 0.00323071 | AT1G54790 | GDSL-like Lipase/Acylhydrolase superfamily protein GDSL-like Lipase/Acylhydrolase superfamily protein                                                                                                    |
| -2.31 | 8.76  | -1.21 | 9.37  | 0.00568994 | AT1G70270 | unknown protein; BEST Arabidopsis thaliana protein match is: unknown protein                                                                                                                             |

|       |       |       |       |            |           |                                                                                                                                                                                                                                                                                                                                                                                                                                                                                                                |
|-------|-------|-------|-------|------------|-----------|----------------------------------------------------------------------------------------------------------------------------------------------------------------------------------------------------------------------------------------------------------------------------------------------------------------------------------------------------------------------------------------------------------------------------------------------------------------------------------------------------------------|
|       |       |       |       |            |           | (TAIR:AT1G23965.1); Has 20 Blast hits to 20 proteins in 7 species: Archae - 0; Bacteria - 0; Metazoa - 0; Fungi - 0; Plants - 20; Viruses - 0; Other Eukaryotes - 0 (source: NCBI BLink).                                                                                                                                                                                                                                                                                                                      |
| -2.31 | 9.3   | -1.21 | 9.91  | 0.00470122 | AT1G77570 | Winged helix-turn-helix transcription repressor DNA-binding                                                                                                                                                                                                                                                                                                                                                                                                                                                    |
| -2.31 | 13.15 | -1.21 | 13.76 | 0.003464   | AT2G19650 | Cysteine/Histidine-rich C1 domain family protein                                                                                                                                                                                                                                                                                                                                                                                                                                                               |
| -2.31 | 8.9   | -1.21 | 9.5   | 0.01895664 | AT2G35990 | LOG2__Putative lysine decarboxylase family protein                                                                                                                                                                                                                                                                                                                                                                                                                                                             |
| -2.31 | 11.95 | -1.21 | 12.55 | 0.02621334 | AT3G22100 | basic helix-loop-helix (bHLH) DNA-binding superfamily protein<br>unknown protein; FUNCTIONS IN: molecular_function unknown; INVOLVED IN:<br>biological_process unknown; LOCATED IN: chloroplast, chloroplast inner membrane, chloroplast<br>envelope; EXPRESSED IN: 23 plant structures; EXPRESSED DURING: 14 growth stages; Has<br>200 Blast hits to 200 proteins in 73 species: Archae - 0; Bacteria - 112; Metazoa - 0; Fungi - 0;<br>Plants - 53; Viruses - 0; Other Eukaryotes - 35 (source: NCBI BLink). |
| -2.31 | 12.22 | -1.21 | 12.83 | 0.00309366 | AT3G61870 |                                                                                                                                                                                                                                                                                                                                                                                                                                                                                                                |
| -2.31 | 9.81  | -1.21 | 10.41 | 0.00229082 | AT4G02005 |                                                                                                                                                                                                                                                                                                                                                                                                                                                                                                                |
| -2.31 | 12.37 | -1.21 | 12.98 | 0.00367141 | AT4G15810 | P-loop containing nucleoside triphosphate hydrolases superfamily protein                                                                                                                                                                                                                                                                                                                                                                                                                                       |
| -2.31 | 11.04 | -1.21 | 11.64 | 0.00567193 | AT5G64780 | Uncharacterised conserved protein UCP009193                                                                                                                                                                                                                                                                                                                                                                                                                                                                    |
| -2.32 | 11.03 | -1.21 | 11.64 | 0.003464   | AT1G54730 | Major facilitator superfamily protein                                                                                                                                                                                                                                                                                                                                                                                                                                                                          |
| -2.32 | 12.71 | -1.21 | 13.32 | 0.01273557 | AT1G59720 | CRR28__Tetratricopeptide repeat (TPR)-like superfamily protein                                                                                                                                                                                                                                                                                                                                                                                                                                                 |
| -2.32 | 10.51 | -1.21 | 11.12 | 0.0358738  | AT3G50570 | hydroxyproline-rich glycoprotein family protein                                                                                                                                                                                                                                                                                                                                                                                                                                                                |
| -2.32 | 9.83  | -1.21 | 10.43 | 0.00593427 | AT3G60970 | ABCC15_ATMRP15_MRP15__multidrug resistance-associated protein 15                                                                                                                                                                                                                                                                                                                                                                                                                                               |
| -2.32 | 10.26 | -1.22 | 10.87 | 0.00314069 | AT5G48220 | Aldolase-type TIM barrel family protein                                                                                                                                                                                                                                                                                                                                                                                                                                                                        |
| -2.32 | 7.43  | -1.22 | 8.04  | 0.01217614 | AT5G48550 | F-box associated ubiquitination effector family protein                                                                                                                                                                                                                                                                                                                                                                                                                                                        |
| -2.33 | 9.15  | -1.22 | 9.76  | 0.00315341 | AT3G52820 | ATPAP22_PAP22__purple acid phosphatase 22                                                                                                                                                                                                                                                                                                                                                                                                                                                                      |
| -2.33 | 8.8   | -1.22 | 9.41  | 0.00494369 | AT4G13494 |                                                                                                                                                                                                                                                                                                                                                                                                                                                                                                                |
| -2.33 | 12.21 | -1.22 | 12.82 | 0.02378688 | AT5G20670 | Protein of unknown function (DUF1677)                                                                                                                                                                                                                                                                                                                                                                                                                                                                          |
| -2.33 | 7.06  | -1.22 | 7.68  | 0.00610609 | AT5G64800 | CLE21__CLAVATA3/ESR-RELATED 21<br>ATBCA4_BCA4_CA4__beta carbonic anhydrase 4 ATBCA4_BCA4_CA4__beta carbonic<br>anhydrase 4                                                                                                                                                                                                                                                                                                                                                                                     |
| -2.34 | 8.63  | -1.22 | 9.24  | 0.00294186 | AT1G70410 |                                                                                                                                                                                                                                                                                                                                                                                                                                                                                                                |
| -2.34 | 10.54 | -1.22 | 11.15 | 0.00732204 | AT2G13570 | NF-YB7__nuclear factor Y, subunit B7                                                                                                                                                                                                                                                                                                                                                                                                                                                                           |
| -2.34 | 7.69  | -1.23 | 8.31  | 0.0112008  | AT2G23672 |                                                                                                                                                                                                                                                                                                                                                                                                                                                                                                                |
| -2.34 | 12.35 | -1.23 | 12.96 | 0.02060718 | AT2G25680 | MOT1__molybdate transporter 1                                                                                                                                                                                                                                                                                                                                                                                                                                                                                  |
| -2.34 | 9.96  | -1.23 | 10.58 | 0.00671183 | AT2G30540 | Thioredoxin superfamily protein                                                                                                                                                                                                                                                                                                                                                                                                                                                                                |
| -2.34 | 12.74 | -1.23 | 13.35 | 0.00508871 | AT2G32550 | Cell differentiation, Rcd1-like protein<br>unknown protein; FUNCTIONS IN: molecular_function unknown; INVOLVED IN:<br>biological_process unknown; LOCATED IN: endomembrane system; EXPRESSED IN: stem,<br>root, inflorescence, cultured cell, leaf; Has 35333 Blast hits to 34131 proteins in 2444 species:<br>Archae - 798; Bacteria - 22429; Metazoa - 974; Fungi - 991; Plants - 531; Viruses - 0; Other<br>Eukaryotes - 9610 (source: NCBI BLink).                                                         |
| -2.34 | 11.74 | -1.23 | 12.35 | 0.00686655 | AT3G09162 |                                                                                                                                                                                                                                                                                                                                                                                                                                                                                                                |

|       |       |       |       |            |           |                                                                                                                                                                                                                                                                                                                                                                                                 |
|-------|-------|-------|-------|------------|-----------|-------------------------------------------------------------------------------------------------------------------------------------------------------------------------------------------------------------------------------------------------------------------------------------------------------------------------------------------------------------------------------------------------|
| -2.34 | 9.25  | -1.22 | 9.86  | 0.00508663 | AT3G09550 | Ankyrin repeat family protein                                                                                                                                                                                                                                                                                                                                                                   |
| -2.34 | 9.27  | -1.23 | 9.88  | 0.00458514 | AT3G20160 | Terpenoid synthases superfamily protein                                                                                                                                                                                                                                                                                                                                                         |
| -2.34 | 12.68 | -1.23 | 13.3  | 0.02266246 | AT3G25010 | AtRLP41_RLP41__receptor like protein 41                                                                                                                                                                                                                                                                                                                                                         |
| -2.34 | 10.14 | -1.23 | 10.75 | 0.00603875 | AT4G38760 | Protein of unknown function (DUF3414)<br>FUNCTIONS IN: molecular_function unknown; INVOLVED IN: biological_process unknown;<br>LOCATED IN: cellular_component unknown; EXPRESSED IN: 17 plant structures;<br>EXPRESSED DURING: 9 growth stages; CONTAINS InterPro DOMAIN/s: Dilute<br>(InterPro:IPR002710); BEST Arabidopsis thaliana protein match is: myosin, putative<br>(TAIR:AT5G20470.1). |
| -2.34 | 9.13  | -1.23 | 9.74  | 0.004055   | AT5G20450 | Ubiquitin carboxyl-terminal hydrolase-related protein                                                                                                                                                                                                                                                                                                                                           |
| -2.34 | 11.85 | -1.23 | 12.46 | 0.00569479 | AT5G61950 | BFN1_ENDO1__bifunctional nuclease i                                                                                                                                                                                                                                                                                                                                                             |
| -2.35 | 11.46 | -1.23 | 12.08 | 0.00565467 | AT1G11190 | NB-ARC domain-containing disease resistance protein                                                                                                                                                                                                                                                                                                                                             |
| -2.35 | 10.25 | -1.23 | 10.86 | 0.01700016 | AT1G50180 | Transmembrane amino acid transporter family protein                                                                                                                                                                                                                                                                                                                                             |
| -2.35 | 11.51 | -1.23 | 12.13 | 0.0043694  | AT3G28960 | ATTTG1_TTG_TTG1_URM23__Transducin/WD40 repeat-like superfamily protein                                                                                                                                                                                                                                                                                                                          |
| -2.35 | 8.63  | -1.24 | 9.25  | 0.00738846 | AT5G24520 | unknown protein; FUNCTIONS IN: molecular_function unknown; INVOLVED IN:<br>biological_process unknown; LOCATED IN: endomembrane system; EXPRESSED IN: 22 plant<br>structures; EXPRESSED DURING: 13 growth stages; BEST Arabidopsis thaliana protein match<br>is: unknown protein (TAIR:AT5G27290.1).                                                                                            |
| -2.36 | 10.23 | -1.24 | 10.85 | 0.00300845 | AT1G54680 | ATHAP5B_HAP5B_NF-YC2__nuclear factor Y, subunit C2                                                                                                                                                                                                                                                                                                                                              |
| -2.36 | 9.54  | -1.24 | 10.16 | 0.01141224 | AT1G56170 | Glycosyl hydrolase superfamily protein                                                                                                                                                                                                                                                                                                                                                          |
| -2.36 | 9.34  | -1.24 | 9.96  | 0.01001317 | AT2G27500 |                                                                                                                                                                                                                                                                                                                                                                                                 |
| -2.36 | 9.15  | -1.24 | 9.77  | 0.00546572 | AT2G46572 |                                                                                                                                                                                                                                                                                                                                                                                                 |
| -2.36 | 10.01 | -1.24 | 10.63 | 0.00326511 | AT3G04485 |                                                                                                                                                                                                                                                                                                                                                                                                 |
| -2.36 | 14.37 | -1.24 | 15    | 0.00459015 | AT4G12830 | alpha/beta-Hydrolases superfamily protein                                                                                                                                                                                                                                                                                                                                                       |
| -2.36 | 9.66  | -1.24 | 10.28 | 0.00877158 | AT4G39440 |                                                                                                                                                                                                                                                                                                                                                                                                 |
| -2.37 | 13.93 | -1.24 | 14.55 | 0.00298853 | AT1G65190 | Protein kinase superfamily protein                                                                                                                                                                                                                                                                                                                                                              |
| -2.37 | 12.42 | -1.24 | 13.05 | 0.00417125 | AT2G32160 | S-adenosyl-L-methionine-dependent methyltransferases superfamily protein S-adenosyl-L-<br>methionine-dependent methyltransferases superfamily protein                                                                                                                                                                                                                                           |
| -2.37 | 13.21 | -1.24 | 13.83 | 0.003464   | AT3G18500 | DNase I-like superfamily protein                                                                                                                                                                                                                                                                                                                                                                |
| -2.37 | 11.21 | -1.25 | 11.83 | 0.01332569 | AT3G49668 | unknown protein; LOCATED IN: endomembrane system; Has 30201 Blast hits to 17322 proteins<br>in 780 species: Archae - 12; Bacteria - 1396; Metazoa - 17338; Fungi - 3422; Plants - 5037;<br>Viruses - 0; Other Eukaryotes - 2996 (source: NCBI BLink).                                                                                                                                           |
| -2.37 | 8.54  | -1.25 | 9.16  | 0.0489117  | AT4G16855 | Protein kinase family protein with leucine-rich repeat domain                                                                                                                                                                                                                                                                                                                                   |
| -2.38 | 13.44 | -1.25 | 14.07 | 0.01512606 | AT1G35710 | unknown protein; Has 30201 Blast hits to 17322 proteins in 780 species: Archae - 12; Bacteria -<br>1396; Metazoa - 17338; Fungi - 3422; Plants - 5037; Viruses - 0; Other Eukaryotes - 2996 (source:<br>NCBI BLink).                                                                                                                                                                            |
| -2.38 | 9.1   | -1.25 | 9.72  | 0.00467998 | AT2G35075 |                                                                                                                                                                                                                                                                                                                                                                                                 |

|       |       |       |       |            |           |                                                                                                                                                                                                          |
|-------|-------|-------|-------|------------|-----------|----------------------------------------------------------------------------------------------------------------------------------------------------------------------------------------------------------|
| -2.38 | 10.58 | -1.25 | 11.2  | 0.00479295 | AT4G15660 | Thioredoxin superfamily protein                                                                                                                                                                          |
| -2.38 | 9.76  | -1.25 | 10.39 | 0.00394838 | AT5G22240 | ATOF10_OF10__Ovate family protein<br>basic helix-loop-helix (bHLH) DNA-binding superfamily protein basic helix-loop-helix (bHLH)                                                                         |
| -2.39 | 10.3  | -1.26 | 10.93 | 0.04674606 | AT1G10586 | DNA-binding superfamily protein                                                                                                                                                                          |
| -2.39 | 14.13 | -1.26 | 14.76 | 0.02227861 | AT1G64500 | Glutaredoxin family protein                                                                                                                                                                              |
| -2.39 | 12.37 | -1.26 | 13    | 0.00420969 | AT3G05932 |                                                                                                                                                                                                          |
| -2.39 | 10.32 | -1.25 | 10.95 | 0.00824002 | AT3G24900 | AtRLP39_RLP39__receptor like protein 39<br>unknown protein; FUNCTIONS IN: molecular_function unknown; INVOLVED IN:<br>biological_process unknown; LOCATED IN: endomembrane system; Has 0 Blast hits to 0 |
| -2.39 | 8.24  | -1.26 | 8.87  | 0.003464   | AT3G28120 | proteins in 0 species (source: NCBI BLink).                                                                                                                                                              |
| -2.39 | 12.14 | -1.26 | 12.77 | 0.0052996  | AT3G57190 | PrfB3__peptide chain release factor, putative                                                                                                                                                            |
| -2.4  | 8.92  | -1.26 | 9.55  | 0.00294186 | AT1G11735 |                                                                                                                                                                                                          |
| -2.4  | 10.99 | -1.27 | 11.62 | 0.00486881 | AT1G17610 | Disease resistance protein (TIR-NBS class)                                                                                                                                                               |
| -2.4  | 9.54  | -1.26 | 10.17 | 0.00733931 | AT1G58227 |                                                                                                                                                                                                          |
| -2.4  | 8.63  | -1.26 | 9.26  | 0.00778937 | AT2G22810 | ACC4_ACS4_ATACS4__1-aminocyclopropane-1-carboxylate synthase 4                                                                                                                                           |
| -2.4  | 9.37  | -1.27 | 10    | 0.00528978 | AT2G33280 | Major facilitator superfamily protein                                                                                                                                                                    |
| -2.4  | 10.25 | -1.27 | 10.89 | 0.00756439 | AT3G23050 | AXR2_IAA7__indole-3-acetic acid 7                                                                                                                                                                        |
| -2.4  | 11.33 | -1.27 | 11.96 | 0.01159209 | AT3G57680 | Peptidase S41 family protein                                                                                                                                                                             |
| -2.4  | 12.84 | -1.26 | 13.47 | 0.00601931 | AT4G29070 | Phospholipase A2 family protein                                                                                                                                                                          |
| -2.4  | 13.14 | -1.26 | 13.77 | 0.00486881 | AT5G25120 | CYP71B11__cytochrome p450, family 71, subfamily B, polypeptide 11                                                                                                                                        |
| -2.41 | 9.26  | -1.27 | 9.9   | 0.00518233 | AT3G06985 | LCR44__low-molecular-weight cysteine-rich 44<br>RNA ligase/cyclic nucleotide phosphodiesterase family protein RNA ligase/cyclic nucleotide                                                               |
| -2.41 | 10.72 | -1.27 | 11.35 | 0.00514085 | AT3G28140 | phosphodiesterase family protein                                                                                                                                                                         |
| -2.42 | 11.27 | -1.28 | 11.9  | 0.0067932  | AT1G33720 | CYP76C6__cytochrome P450, family 76, subfamily C, polypeptide 6                                                                                                                                          |
| -2.42 | 11.49 | -1.27 | 12.12 | 0.00309366 | AT1G62400 | HT1__Protein kinase superfamily protein                                                                                                                                                                  |
| -2.42 | 10.94 | -1.27 | 11.58 | 0.00494369 | AT1G68935 | unknown protein; Has 0 Blast hits to 0 proteins in 0 species (source: NCBI BLink).                                                                                                                       |
| -2.42 | 8.56  | -1.27 | 9.19  | 0.00753143 | AT3G13270 |                                                                                                                                                                                                          |
| -2.42 | 12.29 | -1.27 | 12.93 | 0.01608511 | AT3G19620 | Glycosyl hydrolase family protein                                                                                                                                                                        |
| -2.42 | 14.47 | -1.28 | 15.11 | 0.00836735 | AT4G12320 | CYP706A6__cytochrome P450, family 706, subfamily A, polypeptide 6                                                                                                                                        |
| -2.42 | 13.71 | -1.28 | 14.35 | 0.00627604 | AT4G22200 | AKT2_AKT2/3_AKT3_KT2/3__potassium transport 2/3                                                                                                                                                          |
| -2.42 | 10.02 | -1.27 | 10.66 | 0.00686073 | AT5G01260 | Carbohydrate-binding-like fold Carbohydrate-binding-like fold<br>Disease resistance protein (TIR-NBS-LRR class) family Disease resistance protein (TIR-NBS-                                              |
| -2.42 | 12.82 | -1.27 | 13.46 | 0.00382427 | AT5G46490 | LRR class) family                                                                                                                                                                                        |
| -2.43 | 12.9  | -1.28 | 13.53 | 0.00718811 | AT2G29940 | ABCG31_ATPDR3_PDR3__pleiotropic drug resistance 3                                                                                                                                                        |
| -2.43 | 9.68  | -1.28 | 10.32 | 0.00638451 | AT3G06550 | RWA2__O-acetyltransferase family protein                                                                                                                                                                 |
| -2.43 | 10.5  | -1.28 | 11.14 | 0.02461507 | AT3G62950 | Thioredoxin superfamily protein                                                                                                                                                                          |

|       |       |       |       |            |           |                                                                                                                                                                                                                                                                                                                                                                                         |
|-------|-------|-------|-------|------------|-----------|-----------------------------------------------------------------------------------------------------------------------------------------------------------------------------------------------------------------------------------------------------------------------------------------------------------------------------------------------------------------------------------------|
| -2.43 | 8.77  | -1.28 | 9.41  | 0.01442197 | AT5G53900 | Serine/threonine-protein kinase WNK (With No Lysine)-related                                                                                                                                                                                                                                                                                                                            |
| -2.44 | 10.66 | -1.29 | 11.3  | 0.00309366 | AT1G18750 | AGL65__AGAMOUS-like 65                                                                                                                                                                                                                                                                                                                                                                  |
| -2.44 | 11.76 | -1.28 | 12.4  | 0.006151   | AT2G03530 | ATUPS2_UPS2__ureide permease 2 ATUPS2_UPS2__ureide permease 2                                                                                                                                                                                                                                                                                                                           |
| -2.44 | 12.28 | -1.29 | 12.93 | 0.00424195 | AT2G32160 | S-adenosyl-L-methionine-dependent methyltransferases superfamily protein S-adenosyl-L-methionine-dependent methyltransferases superfamily protein                                                                                                                                                                                                                                       |
| -2.44 | 11.76 | -1.29 | 12.4  | 0.00459015 | AT4G38850 | ATSAUR15_SAUR-AC1_SAUR15_SAUR-AC1__SAUR-like auxin-responsive protein family                                                                                                                                                                                                                                                                                                            |
| -2.44 | 9.62  | -1.29 | 10.26 | 0.01944073 | AT5G62040 | BFT__PEBP (phosphatidylethanolamine-binding protein) family protein                                                                                                                                                                                                                                                                                                                     |
| -2.45 | 12.27 | -1.29 | 12.92 | 0.00749234 | AT1G05690 | BT3__BTB and TAZ domain protein 3                                                                                                                                                                                                                                                                                                                                                       |
| -2.45 | 12.5  | -1.29 | 13.15 | 0.00817702 | AT2G24850 | TAT_TAT3__tyrosine aminotransferase 3                                                                                                                                                                                                                                                                                                                                                   |
| -2.45 | 7.63  | -1.29 | 8.27  | 0.011188   | AT2G39460 | ATRPL23A_RPL23A_RPL23A1_RPL23AA__ribosomal protein L23AA                                                                                                                                                                                                                                                                                                                                |
| -2.46 | 10.21 | -1.3  | 10.86 | 0.0473296  | AT1G30220 | ATINT2_INT2__inositol transporter 2                                                                                                                                                                                                                                                                                                                                                     |
| -2.46 | 12.05 | -1.3  | 12.7  | 0.00514085 | AT1G34060 | Pyridoxal phosphate (PLP)-dependent transferases superfamily protein                                                                                                                                                                                                                                                                                                                    |
| -2.46 | 11.95 | -1.3  | 12.6  | 0.0029534  | AT1G54790 | GDSL-like Lipase/Acylhydrolase superfamily protein GDSL-like Lipase/Acylhydrolase superfamily protein                                                                                                                                                                                                                                                                                   |
| -2.46 | 7.41  | -1.3  | 8.06  | 0.01004503 | AT2G30630 | P-loop containing nucleoside triphosphate hydrolases superfamily protein                                                                                                                                                                                                                                                                                                                |
| -2.46 | 13.69 | -1.3  | 14.34 | 0.00351857 | AT3G48200 | unknown protein; FUNCTIONS IN: molecular_function unknown; INVOLVED IN: biological_process unknown; LOCATED IN: endomembrane system; EXPRESSED IN: 21 plant structures; EXPRESSED DURING: 13 growth stages; Has 210 Blast hits to 148 proteins in 42 species: Archae - 0; Bacteria - 118; Metazoa - 0; Fungi - 0; Plants - 48; Viruses - 0; Other Eukaryotes - 44 (source: NCBI BLink). |
| -2.46 | 8.36  | -1.3  | 9.01  | 0.00294186 | AT4G20440 | smB__small nuclear ribonucleoprotein associated protein B                                                                                                                                                                                                                                                                                                                               |
| -2.46 | 12.16 | -1.3  | 12.81 | 0.01007972 | AT4G37980 | ATCAD7_CAD7_ELI3_ELI3-1__elicitor-activated gene 3-1                                                                                                                                                                                                                                                                                                                                    |
| -2.46 | 11.55 | -1.3  | 12.2  | 0.00580337 | AT5G50800 | AtSWEET13_SWEET13__Nodulin MtN3 family protein                                                                                                                                                                                                                                                                                                                                          |
| -2.47 | 13.37 | -1.31 | 14.02 | 0.02369912 | AT1G20070 | unknown protein; FUNCTIONS IN: molecular_function unknown; INVOLVED IN: biological_process unknown; LOCATED IN: chloroplast; EXPRESSED IN: 20 plant structures; EXPRESSED DURING: 11 growth stages; Has 26 Blast hits to 26 proteins in 9 species: Archae - 0; Bacteria - 0; Metazoa - 0; Fungi - 2; Plants - 24; Viruses - 0; Other Eukaryotes - 0 (source: NCBI BLink).               |
| -2.47 | 9.35  | -1.31 | 10    | 0.02130288 | AT1G34760 | GF14 OMICRON_GRF11_RHS5__general regulatory factor 11                                                                                                                                                                                                                                                                                                                                   |
| -2.48 | 9.43  | -1.31 | 10.09 | 0.00929952 | AT1G02770 | Protein of unknown function (DUF626)                                                                                                                                                                                                                                                                                                                                                    |
| -2.48 | 12.24 | -1.31 | 12.89 | 0.00479295 | AT1G11340 | S-locus lectin protein kinase family protein                                                                                                                                                                                                                                                                                                                                            |
| -2.48 | 9.89  | -1.31 | 10.54 | 0.00576204 | AT1G53160 | SPL4__squamosa promoter binding protein-like 4 SPL4__squamosa promoter binding protein-like 4                                                                                                                                                                                                                                                                                           |
| -2.48 | 8.77  | -1.31 | 9.43  | 0.00409662 | AT2G20100 | basic helix-loop-helix (bHLH) DNA-binding superfamily protein                                                                                                                                                                                                                                                                                                                           |
| -2.48 | 11.92 | -1.31 | 12.57 | 0.01067907 | AT2G32870 | TRAF-like family protein                                                                                                                                                                                                                                                                                                                                                                |
| -2.48 | 11.42 | -1.31 | 12.08 | 0.00462463 | AT2G47750 | GH3.9__putative indole-3-acetic acid-amido synthetase GH3.9                                                                                                                                                                                                                                                                                                                             |

|       |       |       |       |            |           |                                                                                                                                                                                                                                                                                                                                                                                                                                                                                                                                                                                                                                    |
|-------|-------|-------|-------|------------|-----------|------------------------------------------------------------------------------------------------------------------------------------------------------------------------------------------------------------------------------------------------------------------------------------------------------------------------------------------------------------------------------------------------------------------------------------------------------------------------------------------------------------------------------------------------------------------------------------------------------------------------------------|
| -2.48 | 9.81  | -1.31 | 10.46 | 0.00470122 | AT3G26160 | CYP71B17__cytochrome P450, family 71, subfamily B, polypeptide 17                                                                                                                                                                                                                                                                                                                                                                                                                                                                                                                                                                  |
| -2.48 | 10.04 | -1.31 | 10.7  | 0.01471306 | AT5G09820 | Plastid-lipid associated protein PAP / fibrillin family protein<br>unknown protein; FUNCTIONS IN: molecular_function unknown; INVOLVED IN:<br>biological_process unknown; LOCATED IN: endomembrane system; BEST Arabidopsis thaliana<br>protein match is: unknown protein (TAIR:AT2G47010.2); Has 70 Blast hits to 70 proteins in 13<br>species: Archae - 0; Bacteria - 0; Metazoa - 0; Fungi - 0; Plants - 69; Viruses - 0; Other Eukaryotes<br>- 1 (source: NCBI BLink).                                                                                                                                                         |
| -2.49 | 9.02  | -1.31 | 9.68  | 0.00394474 | AT1G17030 | Sec14p-like phosphatidylinositol transfer family protein                                                                                                                                                                                                                                                                                                                                                                                                                                                                                                                                                                           |
| -2.49 | 9.19  | -1.32 | 9.85  | 0.04381863 | AT2G18180 | ATCSLB03_ATCSLB3_CSLB03__cellulose synthase-like B3                                                                                                                                                                                                                                                                                                                                                                                                                                                                                                                                                                                |
| -2.49 | 13.32 | -1.31 | 13.98 | 0.00528978 | AT2G32530 | Tetratricopeptide repeat (TPR)-like superfamily protein                                                                                                                                                                                                                                                                                                                                                                                                                                                                                                                                                                            |
| -2.49 | 13.4  | -1.32 | 14.06 | 0.003464   | AT2G35130 | CYP72A9__cytochrome P450, family 72, subfamily A, polypeptide 9<br>BEST Arabidopsis thaliana protein match is: SET domain protein 14 (TAIR:AT3G61740.1); Has<br>66 Blast hits to 66 proteins in 11 species: Archae - 0; Bacteria - 0; Metazoa - 0; Fungi - 0; Plants -<br>66; Viruses - 0; Other Eukaryotes - 0 (source: NCBI BLink).                                                                                                                                                                                                                                                                                              |
| -2.49 | 9.22  | -1.32 | 9.88  | 0.04563834 | AT3G14630 | alpha/beta-Hydrolases superfamily protein                                                                                                                                                                                                                                                                                                                                                                                                                                                                                                                                                                                          |
| -2.49 | 11.29 | -1.31 | 11.94 | 0.00536471 | AT3G62500 | ATCNGC7_CNGC7__cyclic nucleotide gated channel 7                                                                                                                                                                                                                                                                                                                                                                                                                                                                                                                                                                                   |
| -2.49 | 8.85  | -1.32 | 9.51  | 0.01691591 | AT5G14980 | ATPIN7_PIN7__Auxin efflux carrier family protein                                                                                                                                                                                                                                                                                                                                                                                                                                                                                                                                                                                   |
| -2.5  | 9.65  | -1.32 | 10.31 | 0.00640968 | AT1G15990 | Kunitz family trypsin and protease inhibitor protein                                                                                                                                                                                                                                                                                                                                                                                                                                                                                                                                                                               |
| -2.5  | 10.53 | -1.32 | 11.19 | 0.00367141 | AT1G23080 | AtMYB60_MYB60__myb domain protein 60 AtMYB60_MYB60__myb domain protein 60                                                                                                                                                                                                                                                                                                                                                                                                                                                                                                                                                          |
| -2.5  | 9.67  | -1.32 | 10.33 | 0.00664061 | AT1G73325 | FBD / Leucine Rich Repeat domains containing protein                                                                                                                                                                                                                                                                                                                                                                                                                                                                                                                                                                               |
| -2.51 | 10.53 | -1.33 | 11.2  | 0.0029534  | AT1G08810 | CYP71B36__cytochrome P450, family 71, subfamily B, polypeptide 36                                                                                                                                                                                                                                                                                                                                                                                                                                                                                                                                                                  |
| -2.51 | 7.95  | -1.33 | 8.61  | 0.04683806 | AT1G61320 | ATSPS4F__Sucrose-phosphate synthase family protein                                                                                                                                                                                                                                                                                                                                                                                                                                                                                                                                                                                 |
| -2.51 | 11.7  | -1.33 | 12.37 | 0.00315341 | AT3G26320 | AtMC9_AtMCP2f_MC9_MCP2f__metacaspase 9<br>unknown protein; FUNCTIONS IN: molecular_function unknown; INVOLVED IN:<br>biological_process unknown; LOCATED IN: chloroplast; EXPRESSED IN: 9 plant structures;<br>EXPRESSED DURING: LP.04 four leaves visible, LP.02 two leaves visible, petal differentiation<br>and expansion stage, D bilateral stage; BEST Arabidopsis thaliana protein match is: unknown<br>protein (TAIR:AT3G57950.1); Has 1807 Blast hits to 1807 proteins in 277 species: Archae - 0;<br>Bacteria - 0; Metazoa - 736; Fungi - 347; Plants - 385; Viruses - 0; Other Eukaryotes - 339<br>(source: NCBI BLink). |
| -2.51 | 14.59 | -1.33 | 15.26 | 0.00294186 | AT4G10120 | Leucine-rich repeat transmembrane protein kinase Leucine-rich repeat transmembrane protein<br>kinase                                                                                                                                                                                                                                                                                                                                                                                                                                                                                                                               |
| -2.51 | 13.15 | -1.33 | 13.81 | 0.00565467 | AT5G04200 | BGLU34_TGG4__beta glucosidase 34                                                                                                                                                                                                                                                                                                                                                                                                                                                                                                                                                                                                   |
| -2.51 | 12.72 | -1.32 | 13.38 | 0.01290416 | AT5G06790 | Aluminium activated malate transporter family protein                                                                                                                                                                                                                                                                                                                                                                                                                                                                                                                                                                              |
| -2.52 | 12.2  | -1.33 | 12.86 | 0.0044091  | AT1G29720 | UDP-Glycosyltransferase superfamily protein                                                                                                                                                                                                                                                                                                                                                                                                                                                                                                                                                                                        |
| -2.52 | 11.79 | -1.34 | 12.46 | 0.00787353 | AT1G47600 | unknown protein; Has 30201 Blast hits to 17322 proteins in 780 species: Archae - 12; Bacteria -                                                                                                                                                                                                                                                                                                                                                                                                                                                                                                                                    |
| -2.52 | 11.84 | -1.33 | 12.51 | 0.00326047 | AT1G68600 |                                                                                                                                                                                                                                                                                                                                                                                                                                                                                                                                                                                                                                    |
| -2.52 | 12.85 | -1.33 | 13.52 | 0.00938576 | AT2G36970 |                                                                                                                                                                                                                                                                                                                                                                                                                                                                                                                                                                                                                                    |
| -2.52 | 8.78  | -1.33 | 9.45  | 0.01909056 | AT3G22436 |                                                                                                                                                                                                                                                                                                                                                                                                                                                                                                                                                                                                                                    |

|       |       |       |       |            |           |                                                                                                                                                                                                                                                                                                                                                                                                                                                                                                                                                                                                                                                                                                                                                                                                                                                                                                                                                                                                                                                                                                                                                                                                                                                                                                                                                                                                                                       |
|-------|-------|-------|-------|------------|-----------|---------------------------------------------------------------------------------------------------------------------------------------------------------------------------------------------------------------------------------------------------------------------------------------------------------------------------------------------------------------------------------------------------------------------------------------------------------------------------------------------------------------------------------------------------------------------------------------------------------------------------------------------------------------------------------------------------------------------------------------------------------------------------------------------------------------------------------------------------------------------------------------------------------------------------------------------------------------------------------------------------------------------------------------------------------------------------------------------------------------------------------------------------------------------------------------------------------------------------------------------------------------------------------------------------------------------------------------------------------------------------------------------------------------------------------------|
|       |       |       |       |            |           | 1396; Metazoa - 17338; Fungi - 3422; Plants - 5037; Viruses - 0; Other Eukaryotes - 2996 (source: NCBI BLink).                                                                                                                                                                                                                                                                                                                                                                                                                                                                                                                                                                                                                                                                                                                                                                                                                                                                                                                                                                                                                                                                                                                                                                                                                                                                                                                        |
| -2.52 | 8.89  | -1.34 | 9.56  | 0.0134514  | AT3G27831 | Gamma-thionin family protein<br>BEST Arabidopsis thaliana protein match is: Actin-binding FH2 (Formin Homology) protein (TAIR:AT2G25050.2); Has 30201 Blast hits to 17322 proteins in 780 species: Archae - 12; Bacteria - 1396; Metazoa - 17338; Fungi - 3422; Plants - 5037; Viruses - 0; Other Eukaryotes - 2996 (source: NCBI BLink).                                                                                                                                                                                                                                                                                                                                                                                                                                                                                                                                                                                                                                                                                                                                                                                                                                                                                                                                                                                                                                                                                             |
| -2.52 | 10.57 | -1.33 | 11.24 | 0.00507786 | AT3G32410 | phosphoenolpyruvate carboxylase-related / PEP carboxylase-related                                                                                                                                                                                                                                                                                                                                                                                                                                                                                                                                                                                                                                                                                                                                                                                                                                                                                                                                                                                                                                                                                                                                                                                                                                                                                                                                                                     |
| -2.52 | 13.24 | -1.34 | 13.91 | 0.00424195 | AT3G42628 | serine-rich protein-related                                                                                                                                                                                                                                                                                                                                                                                                                                                                                                                                                                                                                                                                                                                                                                                                                                                                                                                                                                                                                                                                                                                                                                                                                                                                                                                                                                                                           |
| -2.52 | 8.82  | -1.34 | 9.49  | 0.03826368 | AT5G20370 | Protein of unknown function, DUF593                                                                                                                                                                                                                                                                                                                                                                                                                                                                                                                                                                                                                                                                                                                                                                                                                                                                                                                                                                                                                                                                                                                                                                                                                                                                                                                                                                                                   |
| -2.53 | 12.71 | -1.34 | 13.38 | 0.00973078 | AT1G18265 |                                                                                                                                                                                                                                                                                                                                                                                                                                                                                                                                                                                                                                                                                                                                                                                                                                                                                                                                                                                                                                                                                                                                                                                                                                                                                                                                                                                                                                       |
| -2.53 | 8.88  | -1.34 | 9.55  | 0.01488948 | AT1G20015 |                                                                                                                                                                                                                                                                                                                                                                                                                                                                                                                                                                                                                                                                                                                                                                                                                                                                                                                                                                                                                                                                                                                                                                                                                                                                                                                                                                                                                                       |
| -2.53 | 8.44  | -1.34 | 9.11  | 0.00973549 | AT1G64820 | MATE efflux family protein<br>unknown protein; FUNCTIONS IN: molecular_function unknown; INVOLVED IN: biological_process unknown; EXPRESSED IN: 17 plant structures; EXPRESSED DURING: 11 growth stages; Has 33 Blast hits to 33 proteins in 10 species: Archae - 0; Bacteria - 0; Metazoa - 0; Fungi - 0; Plants - 33; Viruses - 0; Other Eukaryotes - 0 (source: NCBI BLink). unknown protein; FUNCTIONS IN: molecular_function unknown; INVOLVED IN: biological_process unknown; EXPRESSED IN: 17 plant structures; EXPRESSED DURING: 11 growth stages; Has 33 Blast hits to 33 proteins in 10 species: Archae - 0; Bacteria - 0; Metazoa - 0; Fungi - 0; Plants - 33; Viruses - 0; Other Eukaryotes - 0 (source: NCBI BLink). unknown protein; FUNCTIONS IN: molecular_function unknown; INVOLVED IN: biological_process unknown; EXPRESSED IN: 17 plant structures; EXPRESSED DURING: 11 growth stages; Has 33 Blast hits to 33 proteins in 10 species: Archae - 0; Bacteria - 0; Metazoa - 0; Fungi - 0; Plants - 33; Viruses - 0; Other Eukaryotes - 0 (source: NCBI BLink). unknown protein; FUNCTIONS IN: molecular_function unknown; INVOLVED IN: biological_process unknown; EXPRESSED IN: 17 plant structures; EXPRESSED DURING: 11 growth stages; Has 33 Blast hits to 33 proteins in 10 species: Archae - 0; Bacteria - 0; Metazoa - 0; Fungi - 0; Plants - 33; Viruses - 0; Other Eukaryotes - 0 (source: NCBI BLink). |
| -2.53 | 10.49 | -1.34 | 11.16 | 0.01004503 | AT2G04790 | NCBI BLink).                                                                                                                                                                                                                                                                                                                                                                                                                                                                                                                                                                                                                                                                                                                                                                                                                                                                                                                                                                                                                                                                                                                                                                                                                                                                                                                                                                                                                          |
| -2.53 | 7.84  | -1.34 | 8.51  | 0.0070479  | AT3G54070 | Ankyrin repeat family protein                                                                                                                                                                                                                                                                                                                                                                                                                                                                                                                                                                                                                                                                                                                                                                                                                                                                                                                                                                                                                                                                                                                                                                                                                                                                                                                                                                                                         |
| -2.53 | 10.62 | -1.34 | 11.29 | 0.03008118 | AT5G59340 | WOX2__WUSCHEL related homeobox 2                                                                                                                                                                                                                                                                                                                                                                                                                                                                                                                                                                                                                                                                                                                                                                                                                                                                                                                                                                                                                                                                                                                                                                                                                                                                                                                                                                                                      |
| -2.54 | 8.39  | -1.34 | 9.06  | 0.028157   | AT1G05065 | CLE20__CLAVATA3/ESR-RELATED 20                                                                                                                                                                                                                                                                                                                                                                                                                                                                                                                                                                                                                                                                                                                                                                                                                                                                                                                                                                                                                                                                                                                                                                                                                                                                                                                                                                                                        |
| -2.54 | 11.85 | -1.35 | 12.52 | 0.0081946  | AT1G07450 | NAD(P)-binding Rossmann-fold superfamily protein                                                                                                                                                                                                                                                                                                                                                                                                                                                                                                                                                                                                                                                                                                                                                                                                                                                                                                                                                                                                                                                                                                                                                                                                                                                                                                                                                                                      |
| -2.54 | 12.2  | -1.34 | 12.87 | 0.01036777 | AT1G67070 | DIN9_PMI2__Mannose-6-phosphate isomerase, type I                                                                                                                                                                                                                                                                                                                                                                                                                                                                                                                                                                                                                                                                                                                                                                                                                                                                                                                                                                                                                                                                                                                                                                                                                                                                                                                                                                                      |
| -2.54 | 11.01 | -1.34 | 11.68 | 0.0151742  | AT3G14450 | CID9__CTC-interacting domain 9                                                                                                                                                                                                                                                                                                                                                                                                                                                                                                                                                                                                                                                                                                                                                                                                                                                                                                                                                                                                                                                                                                                                                                                                                                                                                                                                                                                                        |
| -2.54 | 11.83 | -1.34 | 12.5  | 0.01201455 | AT5G09930 | ABCF2__ABC transporter family protein                                                                                                                                                                                                                                                                                                                                                                                                                                                                                                                                                                                                                                                                                                                                                                                                                                                                                                                                                                                                                                                                                                                                                                                                                                                                                                                                                                                                 |
| -2.55 | 12.74 | -1.35 | 13.41 | 0.03542162 | AT1G09240 | ATNAS3_NAS3__nicotianamine synthase 3                                                                                                                                                                                                                                                                                                                                                                                                                                                                                                                                                                                                                                                                                                                                                                                                                                                                                                                                                                                                                                                                                                                                                                                                                                                                                                                                                                                                 |

|       |       |       |       |            |           |                                                                                                                                                                                                                                                                                                                                                                                                                                                                                                                                                                                                               |
|-------|-------|-------|-------|------------|-----------|---------------------------------------------------------------------------------------------------------------------------------------------------------------------------------------------------------------------------------------------------------------------------------------------------------------------------------------------------------------------------------------------------------------------------------------------------------------------------------------------------------------------------------------------------------------------------------------------------------------|
| -2.55 | 9.46  | -1.35 | 10.14 | 0.00394474 | AT1G09890 | Rhamnogalacturonate lyase family protein<br>GDSL-like Lipase/Acylhydrolase superfamily protein GDSL-like Lipase/Acylhydrolase                                                                                                                                                                                                                                                                                                                                                                                                                                                                                 |
| -2.55 | 12.29 | -1.35 | 12.97 | 0.00430342 | AT1G28610 | superfamily protein                                                                                                                                                                                                                                                                                                                                                                                                                                                                                                                                                                                           |
| -2.55 | 10.66 | -1.35 | 11.33 | 0.00294186 | AT1G58602 | LRR and NB-ARC domains-containing disease resistance protein                                                                                                                                                                                                                                                                                                                                                                                                                                                                                                                                                  |
| -2.55 | 8.92  | -1.35 | 9.59  | 0.0052996  | AT3G14700 | SART-1 family<br>unknown protein; Has 1 Blast hits to 1 proteins in 1 species: Archae - 0; Bacteria - 0; Metazoa - 0;                                                                                                                                                                                                                                                                                                                                                                                                                                                                                         |
| -2.55 | 9.67  | -1.35 | 10.35 | 0.00554683 | AT3G30840 | Fungi - 0; Plants - 1; Viruses - 0; Other Eukaryotes - 0 (source: NCBI BLink).<br>unknown protein; FUNCTIONS IN: molecular_function unknown; INVOLVED IN:<br>biological_process unknown; LOCATED IN: endomembrane system; EXPRESSED IN: 6 plant<br>structures; EXPRESSED DURING: LP.04 four leaves visible, LP.02 two leaves visible; Has 63<br>Blast hits to 63 proteins in 13 species: Archae - 0; Bacteria - 0; Metazoa - 0; Fungi - 0; Plants - 63;<br>Viruses - 0; Other Eukaryotes - 0 (source: NCBI BLink).                                                                                            |
| -2.56 | 10.58 | -1.36 | 11.26 | 0.01233326 | AT3G14760 | Protein kinase superfamily protein                                                                                                                                                                                                                                                                                                                                                                                                                                                                                                                                                                            |
| -2.56 | 13.71 | -1.35 | 14.39 | 0.00472051 | AT4G31390 | Transmembrane amino acid transporter family protein                                                                                                                                                                                                                                                                                                                                                                                                                                                                                                                                                           |
| -2.56 | 14.18 | -1.35 | 14.86 | 0.00417125 | AT5G02180 | ATAVP3_AtVHP1;1_AVP-3_AVP1_FUGU5__Inorganic H pyrophosphatase family protein                                                                                                                                                                                                                                                                                                                                                                                                                                                                                                                                  |
| -2.57 | 11.15 | -1.36 | 11.83 | 0.01304803 | AT1G15690 | Ankyrin repeat family protein                                                                                                                                                                                                                                                                                                                                                                                                                                                                                                                                                                                 |
| -2.57 | 10.96 | -1.36 | 11.65 | 0.00251625 | AT1G75163 | Leucine-rich repeat (LRR) family protein                                                                                                                                                                                                                                                                                                                                                                                                                                                                                                                                                                      |
| -2.57 | 12.74 | -1.36 | 13.42 | 0.0052996  | AT3G04140 | CRK22__cysteine-rich RLK (RECEPTOR-like protein kinase) 22                                                                                                                                                                                                                                                                                                                                                                                                                                                                                                                                                    |
| -2.57 | 11.65 | -1.36 | 12.33 | 0.01013972 | AT3G25670 | Undecaprenyl pyrophosphate synthetase family protein                                                                                                                                                                                                                                                                                                                                                                                                                                                                                                                                                          |
| -2.57 | 13.19 | -1.36 | 13.87 | 0.00356968 | AT4G23300 | BGLU35_TGG5__beta glucosidase 35                                                                                                                                                                                                                                                                                                                                                                                                                                                                                                                                                                              |
| -2.57 | 13.92 | -1.36 | 14.6  | 0.00514085 | AT5G58770 | DML3__demeter-like protein 3 DML3__demeter-like protein 3                                                                                                                                                                                                                                                                                                                                                                                                                                                                                                                                                     |
| -2.58 | 12.51 | -1.37 | 13.19 | 0.00760062 | AT1G51470 | Adenosylmethionine decarboxylase family protein                                                                                                                                                                                                                                                                                                                                                                                                                                                                                                                                                               |
| -2.58 | 11.82 | -1.37 | 12.5  | 0.00229082 | AT4G34060 | GroES-like zinc-binding alcohol dehydrogenase family protein                                                                                                                                                                                                                                                                                                                                                                                                                                                                                                                                                  |
| -2.58 | 13.59 | -1.37 | 14.28 | 0.01453086 | AT5G15950 | Protein of unknown function (DUF295)                                                                                                                                                                                                                                                                                                                                                                                                                                                                                                                                                                          |
| -2.58 | 9.4   | -1.37 | 10.08 | 0.00510371 | AT5G51970 | unknown protein; BEST Arabidopsis thaliana protein match is: unknown protein<br>(TAIR:AT1G64680.1); Has 35333 Blast hits to 34131 proteins in 2444 species: Archae - 798;<br>Bacteria - 22429; Metazoa - 974; Fungi - 991; Plants - 531; Viruses - 0; Other Eukaryotes - 9610<br>(source: NCBI BLink). unknown protein; BEST Arabidopsis thaliana protein match is: unknown<br>protein (TAIR:AT1G64680.1); Has 35333 Blast hits to 34131 proteins in 2444 species: Archae -<br>798; Bacteria - 22429; Metazoa - 974; Fungi - 991; Plants - 531; Viruses - 0; Other Eukaryotes -<br>9610 (source: NCBI BLink). |
| -2.59 | 10.67 | -1.37 | 11.35 | 0.00420934 | AT1G05540 | RNS3__ribonuclease 3                                                                                                                                                                                                                                                                                                                                                                                                                                                                                                                                                                                          |
| -2.59 | 8.12  | -1.37 | 8.81  | 0.00417125 | AT3G17185 | GDSL-like Lipase/Acylhydrolase superfamily protein GDSL-like Lipase/Acylhydrolase<br>superfamily protein                                                                                                                                                                                                                                                                                                                                                                                                                                                                                                      |
| -2.6  | 12.62 | -1.38 | 13.3  | 0.00472051 | AT1G03055 |                                                                                                                                                                                                                                                                                                                                                                                                                                                                                                                                                                                                               |
| -2.6  | 12.67 | -1.38 | 13.36 | 0.00767206 | AT1G26820 |                                                                                                                                                                                                                                                                                                                                                                                                                                                                                                                                                                                                               |
| -2.6  | 12.28 | -1.38 | 12.97 | 0.00470122 | AT1G28610 |                                                                                                                                                                                                                                                                                                                                                                                                                                                                                                                                                                                                               |



|       |       |       |       |            |           |                                                                                                                                                                                                                                                                                                                                                                                                                                                                                                                                                                                                                                                                                                                                                                                                                                                                                                                                                                                                                                                                                                                                                                                                                                                                                                                                                                                                                                                                              |
|-------|-------|-------|-------|------------|-----------|------------------------------------------------------------------------------------------------------------------------------------------------------------------------------------------------------------------------------------------------------------------------------------------------------------------------------------------------------------------------------------------------------------------------------------------------------------------------------------------------------------------------------------------------------------------------------------------------------------------------------------------------------------------------------------------------------------------------------------------------------------------------------------------------------------------------------------------------------------------------------------------------------------------------------------------------------------------------------------------------------------------------------------------------------------------------------------------------------------------------------------------------------------------------------------------------------------------------------------------------------------------------------------------------------------------------------------------------------------------------------------------------------------------------------------------------------------------------------|
| -2.6  | 9.17  | -1.38 | 9.86  | 0.02414463 | AT1G55950 | DNA-binding storekeeper protein-related transcriptional regulator<br>unknown protein; FUNCTIONS IN: molecular_function unknown; INVOLVED IN: biological_process unknown; EXPRESSED IN: 17 plant structures; EXPRESSED DURING: 11 growth stages; Has 33 Blast hits to 33 proteins in 10 species: Archae - 0; Bacteria - 0; Metazoa - 0; Fungi - 0; Plants - 33; Viruses - 0; Other Eukaryotes - 0 (source: NCBI BLink). unknown protein; FUNCTIONS IN: molecular_function unknown; INVOLVED IN: biological_process unknown; EXPRESSED IN: 17 plant structures; EXPRESSED DURING: 11 growth stages; Has 33 Blast hits to 33 proteins in 10 species: Archae - 0; Bacteria - 0; Metazoa - 0; Fungi - 0; Plants - 33; Viruses - 0; Other Eukaryotes - 0 (source: NCBI BLink). unknown protein; FUNCTIONS IN: molecular_function unknown; INVOLVED IN: biological_process unknown; EXPRESSED IN: 17 plant structures; EXPRESSED DURING: 11 growth stages; Has 33 Blast hits to 33 proteins in 10 species: Archae - 0; Bacteria - 0; Metazoa - 0; Fungi - 0; Plants - 33; Viruses - 0; Other Eukaryotes - 0 (source: NCBI BLink). unknown protein; FUNCTIONS IN: molecular_function unknown; INVOLVED IN: biological_process unknown; EXPRESSED IN: 17 plant structures; EXPRESSED DURING: 11 growth stages; Has 33 Blast hits to 33 proteins in 10 species: Archae - 0; Bacteria - 0; Metazoa - 0; Fungi - 0; Plants - 33; Viruses - 0; Other Eukaryotes - 0 (source: NCBI BLink). |
| -2.6  | 10.65 | -1.38 | 11.34 | 0.00442816 | AT2G04790 | NCBI BLink).                                                                                                                                                                                                                                                                                                                                                                                                                                                                                                                                                                                                                                                                                                                                                                                                                                                                                                                                                                                                                                                                                                                                                                                                                                                                                                                                                                                                                                                                 |
| -2.6  | 11.39 | -1.38 | 12.08 | 0.01681687 | AT3G06520 | agenet domain-containing protein                                                                                                                                                                                                                                                                                                                                                                                                                                                                                                                                                                                                                                                                                                                                                                                                                                                                                                                                                                                                                                                                                                                                                                                                                                                                                                                                                                                                                                             |
| -2.6  | 11.26 | -1.38 | 11.95 | 0.00518233 | AT3G21360 | 2-oxoglutarate (2OG) and Fe(II)-dependent oxygenase superfamily protein                                                                                                                                                                                                                                                                                                                                                                                                                                                                                                                                                                                                                                                                                                                                                                                                                                                                                                                                                                                                                                                                                                                                                                                                                                                                                                                                                                                                      |
| -2.6  | 12.65 | -1.38 | 13.34 | 0.00900027 | AT4G01080 | TBL26__TRICHOME BIREFRINGENCE-LIKE 26                                                                                                                                                                                                                                                                                                                                                                                                                                                                                                                                                                                                                                                                                                                                                                                                                                                                                                                                                                                                                                                                                                                                                                                                                                                                                                                                                                                                                                        |
| -2.6  | 9.02  | -1.38 | 9.71  | 0.00413041 | AT5G51470 | Auxin-responsive GH3 family protein                                                                                                                                                                                                                                                                                                                                                                                                                                                                                                                                                                                                                                                                                                                                                                                                                                                                                                                                                                                                                                                                                                                                                                                                                                                                                                                                                                                                                                          |
| -2.61 | 10.48 | -1.39 | 11.18 | 0.00600392 | AT1G05900 | ATNTH2_NTH2__endonuclease III 2 ATNTH2_NTH2__endonuclease III 2                                                                                                                                                                                                                                                                                                                                                                                                                                                                                                                                                                                                                                                                                                                                                                                                                                                                                                                                                                                                                                                                                                                                                                                                                                                                                                                                                                                                              |
| -2.61 | 12.65 | -1.38 | 13.34 | 0.00356968 | AT4G11900 | S-locus lectin protein kinase family protein                                                                                                                                                                                                                                                                                                                                                                                                                                                                                                                                                                                                                                                                                                                                                                                                                                                                                                                                                                                                                                                                                                                                                                                                                                                                                                                                                                                                                                 |
| -2.61 | 13.6  | -1.38 | 14.29 | 0.01959754 | AT4G31870 | ATGPX7_GPX7__glutathione peroxidase 7                                                                                                                                                                                                                                                                                                                                                                                                                                                                                                                                                                                                                                                                                                                                                                                                                                                                                                                                                                                                                                                                                                                                                                                                                                                                                                                                                                                                                                        |
| -2.61 | 12.51 | -1.39 | 13.2  | 0.00833848 | AT5G15850 | BBX2_ATCOL1_COL1__CONSTANS-like 1                                                                                                                                                                                                                                                                                                                                                                                                                                                                                                                                                                                                                                                                                                                                                                                                                                                                                                                                                                                                                                                                                                                                                                                                                                                                                                                                                                                                                                            |
| -2.61 | 12.98 | -1.39 | 13.67 | 0.00918393 | AT5G43860 | ATCLH2_CLH2__chlorophyllase 2                                                                                                                                                                                                                                                                                                                                                                                                                                                                                                                                                                                                                                                                                                                                                                                                                                                                                                                                                                                                                                                                                                                                                                                                                                                                                                                                                                                                                                                |
| -2.62 | 12.24 | -1.39 | 12.93 | 0.04152948 | AT1G09500 | NAD(P)-binding Rossmann-fold superfamily protein                                                                                                                                                                                                                                                                                                                                                                                                                                                                                                                                                                                                                                                                                                                                                                                                                                                                                                                                                                                                                                                                                                                                                                                                                                                                                                                                                                                                                             |
| -2.62 | 10.04 | -1.39 | 10.74 | 0.00410995 | AT3G05327 | Cyclin family protein                                                                                                                                                                                                                                                                                                                                                                                                                                                                                                                                                                                                                                                                                                                                                                                                                                                                                                                                                                                                                                                                                                                                                                                                                                                                                                                                                                                                                                                        |
| -2.62 | 9.72  | -1.39 | 10.41 | 0.02097806 | AT3G16360 | AHP4__HPT phosphotransmitter 4<br>Disease resistance protein (TIR-NBS-LRR class) family Disease resistance protein (TIR-NBS-LRR class) family                                                                                                                                                                                                                                                                                                                                                                                                                                                                                                                                                                                                                                                                                                                                                                                                                                                                                                                                                                                                                                                                                                                                                                                                                                                                                                                                |
| -2.62 | 10.95 | -1.39 | 11.65 | 0.00229082 | AT5G46490 | LRR class) family                                                                                                                                                                                                                                                                                                                                                                                                                                                                                                                                                                                                                                                                                                                                                                                                                                                                                                                                                                                                                                                                                                                                                                                                                                                                                                                                                                                                                                                            |
| -2.62 | 9.38  | -1.39 | 10.07 | 0.01287277 | AT5G51030 | NAD(P)-binding Rossmann-fold superfamily protein                                                                                                                                                                                                                                                                                                                                                                                                                                                                                                                                                                                                                                                                                                                                                                                                                                                                                                                                                                                                                                                                                                                                                                                                                                                                                                                                                                                                                             |
| -2.62 | 11.68 | -1.39 | 12.37 | 0.0029534  | AT5G61350 | Protein kinase superfamily protein                                                                                                                                                                                                                                                                                                                                                                                                                                                                                                                                                                                                                                                                                                                                                                                                                                                                                                                                                                                                                                                                                                                                                                                                                                                                                                                                                                                                                                           |
| -2.63 | 9.66  | -1.4  | 10.36 | 0.00610922 | AT1G12440 | A20/AN1-like zinc finger family protein                                                                                                                                                                                                                                                                                                                                                                                                                                                                                                                                                                                                                                                                                                                                                                                                                                                                                                                                                                                                                                                                                                                                                                                                                                                                                                                                                                                                                                      |
| -2.63 | 11.11 | -1.4  | 11.81 | 0.00508871 | AT1G29600 | Zinc finger C-x8-C-x5-C-x3-H type family protein                                                                                                                                                                                                                                                                                                                                                                                                                                                                                                                                                                                                                                                                                                                                                                                                                                                                                                                                                                                                                                                                                                                                                                                                                                                                                                                                                                                                                             |
| -2.64 | 10.06 | -1.4  | 10.76 | 0.00398842 | AT1G04550 | BDL_IAA12__AUX/IAA transcriptional regulator family protein                                                                                                                                                                                                                                                                                                                                                                                                                                                                                                                                                                                                                                                                                                                                                                                                                                                                                                                                                                                                                                                                                                                                                                                                                                                                                                                                                                                                                  |

|       |       |       |       |            |           |                                                                                                                                                                                                                                        |
|-------|-------|-------|-------|------------|-----------|----------------------------------------------------------------------------------------------------------------------------------------------------------------------------------------------------------------------------------------|
| -2.64 | 12.42 | -1.4  | 13.12 | 0.00674365 | AT3G01660 | S-adenosyl-L-methionine-dependent methyltransferases superfamily protein                                                                                                                                                               |
| -2.64 | 8.36  | -1.4  | 9.06  | 0.02786959 | AT3G56891 | Heavy metal transport/detoxification superfamily protein                                                                                                                                                                               |
| -2.64 | 11.23 | -1.4  | 11.93 | 0.00358217 | AT4G13830 | J20__DNAJ-like 20 J20__DNAJ-like 20                                                                                                                                                                                                    |
| -2.64 | 11.35 | -1.4  | 12.05 | 0.00417546 | AT5G14350 | Pentatricopeptide repeat (PPR) superfamily protein                                                                                                                                                                                     |
| -2.65 | 12.06 | -1.41 | 12.76 | 0.00394474 | AT1G52880 | ANAC018_ATNAM_NAM_NARS2__NAC (No Apical Meristem) domain transcriptional regulator superfamily protein                                                                                                                                 |
| -2.65 | 9.63  | -1.41 | 10.34 | 0.00879784 | AT1G56710 | Pectin lyase-like superfamily protein                                                                                                                                                                                                  |
| -2.65 | 10.51 | -1.4  | 11.22 | 0.00313253 | AT5G02330 | Cysteine/Histidine-rich C1 domain family protein                                                                                                                                                                                       |
| -2.65 | 11.49 | -1.41 | 12.2  | 0.00982602 | AT5G24140 | SQP2__squalene monooxygenase 2                                                                                                                                                                                                         |
| -2.65 | 13.2  | -1.4  | 13.9  | 0.00417125 | AT5G55570 | unknown protein; LOCATED IN: chloroplast; Has 35333 Blast hits to 34131 proteins in 2444 species: Archae - 798; Bacteria - 22429; Metazoa - 974; Fungi - 991; Plants - 531; Viruses - 0; Other Eukaryotes - 9610 (source: NCBI BLink). |
| -2.66 | 12    | -1.41 | 12.7  | 0.00644964 | AT2G03710 | AGL3_SEP4__K-box region and MADS-box transcription factor family protein                                                                                                                                                               |
| -2.66 | 9.25  | -1.41 | 9.96  | 0.0046281  | AT3G63375 | AGL3_SEP4__K-box region and MADS-box transcription factor family protein                                                                                                                                                               |
| -2.66 | 9.58  | -1.41 | 10.28 | 0.01649762 | AT5G35777 | AGL3_SEP4__K-box region and MADS-box transcription factor family protein                                                                                                                                                               |
| -2.66 | 12.25 | -1.41 | 12.95 | 0.00356968 | AT5G61270 | PIF7__phytochrome-interacting factor7 PIF7__phytochrome-interacting factor7                                                                                                                                                            |
| -2.67 | 7.07  | -1.42 | 7.78  | 0.00810235 | AT1G66540 | Cytochrome P450 superfamily protein Cytochrome P450 superfamily protein                                                                                                                                                                |
| -2.67 | 11.88 | -1.42 | 12.58 | 0.00796998 | AT3G18485 | ILR2__iaa-leucine resistant 2                                                                                                                                                                                                          |
| -2.67 | 9.78  | -1.42 | 10.49 | 0.00367141 | AT5G02600 | NAKR1_NPCC6__Heavy metal transport/detoxification superfamily protein                                                                                                                                                                  |
| -2.67 | 10.87 | -1.42 | 11.58 | 0.00833976 | AT5G02840 | LCL1__LHY/CCA1-like 1                                                                                                                                                                                                                  |
| -2.67 | 10.24 | -1.41 | 10.94 | 0.02010764 | AT5G20225 |                                                                                                                                                                                                                                        |
| -2.67 | 9.82  | -1.42 | 10.52 | 0.00704462 | AT5G46220 | Protein of unknown function (DUF616)                                                                                                                                                                                                   |
| -2.67 | 10.62 | -1.41 | 11.33 | 0.0047211  | AT5G63470 | NF-YC4__nuclear factor Y, subunit C4                                                                                                                                                                                                   |
| -2.69 | 8.94  | -1.43 | 9.65  | 0.01039189 | AT1G69720 | HO3__heme oxygenase 3 HO3__heme oxygenase 3                                                                                                                                                                                            |
| -2.69 | 10.78 | -1.43 | 11.5  | 0.00968394 | AT1G71490 | Tetratricopeptide repeat (TPR)-like superfamily protein                                                                                                                                                                                |
| -2.7  | 11.35 | -1.43 | 12.07 | 0.00584196 | AT1G29460 | SAUR-like auxin-responsive protein family                                                                                                                                                                                              |
| -2.7  | 12.3  | -1.43 | 13.01 | 0.00583609 | AT3G06510 | ATSFR2_SFR2__Glycosyl hydrolase superfamily protein                                                                                                                                                                                    |
| -2.7  | 10.51 | -1.43 | 11.23 | 0.00394474 | AT3G08870 | Concanavalin A-like lectin protein kinase family protein                                                                                                                                                                               |
| -2.7  | 8.84  | -1.43 | 9.56  | 0.00666122 | AT3G59510 | Leucine-rich repeat (LRR) family protein                                                                                                                                                                                               |
| -2.7  | 9.27  | -1.44 | 9.98  | 0.0056423  | AT5G45850 | Protein of unknown function (DUF688)                                                                                                                                                                                                   |
| -2.71 | 9.92  | -1.44 | 10.64 | 0.01222973 | AT2G15060 |                                                                                                                                                                                                                                        |
| -2.71 | 13.26 | -1.44 | 13.98 | 0.00445289 | AT4G12310 | CYP706A5__cytochrome P450, family 706, subfamily A, polypeptide 5                                                                                                                                                                      |
| -2.71 | 9.01  | -1.44 | 9.72  | 0.00479295 | AT4G33820 | Glycosyl hydrolase superfamily protein                                                                                                                                                                                                 |
| -2.72 | 12.49 | -1.44 | 13.22 | 0.00286412 | AT1G05310 | Pectin lyase-like superfamily protein                                                                                                                                                                                                  |

|       |       |       |       |            |           |                                                                                                                                                                                                                                                                                                                                                                                                                                                                                       |
|-------|-------|-------|-------|------------|-----------|---------------------------------------------------------------------------------------------------------------------------------------------------------------------------------------------------------------------------------------------------------------------------------------------------------------------------------------------------------------------------------------------------------------------------------------------------------------------------------------|
| -2.72 | 11.63 | -1.44 | 12.35 | 0.00429467 | AT1G30860 | RING/U-box superfamily protein                                                                                                                                                                                                                                                                                                                                                                                                                                                        |
| -2.73 | 11.03 | -1.45 | 11.75 | 0.01526214 | AT3G54510 | Early-responsive to dehydration stress protein (ERD4)<br>unknown protein; Has 1807 Blast hits to 1807 proteins in 277 species: Archae - 0; Bacteria - 0; Metazoa - 736; Fungi - 347; Plants - 385; Viruses - 0; Other Eukaryotes - 339 (source: NCBI BLink).                                                                                                                                                                                                                          |
| -2.73 | 8.59  | -1.45 | 9.31  | 0.00796998 | AT5G60290 | BBX17_B-box type zinc finger protein with CCT domain                                                                                                                                                                                                                                                                                                                                                                                                                                  |
| -2.74 | 9.78  | -1.46 | 10.51 | 0.00973549 | AT1G49130 | alpha/beta-Hydrolases superfamily protein                                                                                                                                                                                                                                                                                                                                                                                                                                             |
| -2.74 | 11.23 | -1.45 | 11.95 | 0.01490902 | AT1G51440 | ARK2_RK2__receptor kinase 2                                                                                                                                                                                                                                                                                                                                                                                                                                                           |
| -2.74 | 13.26 | -1.45 | 13.98 | 0.00534835 | AT1G65800 | Protein of unknown function (DUF1666)                                                                                                                                                                                                                                                                                                                                                                                                                                                 |
| -2.74 | 11.73 | -1.46 | 12.46 | 0.00784132 | AT1G69610 | Transmembrane amino acid transporter family protein                                                                                                                                                                                                                                                                                                                                                                                                                                   |
| -2.74 | 14.34 | -1.45 | 15.06 | 0.00195989 | AT3G54830 | RING/FYVE/PHD zinc finger superfamily protein                                                                                                                                                                                                                                                                                                                                                                                                                                         |
| -2.74 | 11.56 | -1.45 | 12.28 | 0.00447426 | AT4G10600 | Rhamnogalacturonate lyase family protein                                                                                                                                                                                                                                                                                                                                                                                                                                              |
| -2.74 | 10.8  | -1.45 | 11.52 | 0.00201069 | AT4G24430 | TBL43__TRICHOME BIREFRINGENCE-LIKE 43                                                                                                                                                                                                                                                                                                                                                                                                                                                 |
| -2.75 | 10.02 | -1.46 | 10.75 | 0.00712636 | AT2G30900 | ATCSLB02_ATCSLB2_CSLB02_CSLB02__cellulose synthase-like B                                                                                                                                                                                                                                                                                                                                                                                                                             |
| -2.75 | 10.53 | -1.46 | 11.26 | 0.00294186 | AT2G32620 | unknown protein; LOCATED IN: endomembrane system; Has 30201 Blast hits to 17322 proteins in 780 species: Archae - 12; Bacteria - 1396; Metazoa - 17338; Fungi - 3422; Plants - 5037; Viruses - 0; Other Eukaryotes - 2996 (source: NCBI BLink).                                                                                                                                                                                                                                       |
| -2.75 | 9.72  | -1.46 | 10.45 | 0.00643968 | AT3G14452 | Protein of unknown function (DUF1216)                                                                                                                                                                                                                                                                                                                                                                                                                                                 |
| -2.75 | 9.37  | -1.46 | 10.1  | 0.00640693 | AT3G28770 | unknown protein; FUNCTIONS IN: molecular_function unknown; INVOLVED IN: biological_process unknown; LOCATED IN: mitochondrion; EXPRESSED IN: 7 plant structures; EXPRESSED DURING: 4 anthesis, C globular stage, petal differentiation and expansion stage; Has 106 Blast hits to 103 proteins in 21 species: Archae - 0; Bacteria - 5; Metazoa - 0; Fungi - 4; Plants - 87; Viruses - 0; Other Eukaryotes - 10 (source: NCBI BLink).                                                 |
| -2.76 | 8.85  | -1.47 | 9.58  | 0.00643035 | AT2G14095 | Protein of unknown function (DUF688)                                                                                                                                                                                                                                                                                                                                                                                                                                                  |
| -2.76 | 7.54  | -1.46 | 8.27  | 0.00392545 | AT3G51760 | ARAD2__Exostosin family protein                                                                                                                                                                                                                                                                                                                                                                                                                                                       |
| -2.76 | 9.84  | -1.47 | 10.58 | 0.00433482 | AT5G44930 | XERICO__RING/U-box superfamily protein                                                                                                                                                                                                                                                                                                                                                                                                                                                |
| -2.77 | 7.81  | -1.47 | 8.55  | 0.00356968 | AT2G04240 | FUNCTIONS IN: molecular_function unknown; INVOLVED IN: protein folding, protein transport; LOCATED IN: chloroplast; EXPRESSED IN: 23 plant structures; EXPRESSED DURING: 13 growth stages; CONTAINS InterPro DOMAIN/s: Trigger factor, ribosome-binding, bacterial (InterPro:IPR008881); Has 35333 Blast hits to 34131 proteins in 2444 species: Archae - 798; Bacteria - 22429; Metazoa - 974; Fungi - 991; Plants - 531; Viruses - 0; Other Eukaryotes - 9610 (source: NCBI BLink). |
| -2.77 | 8.66  | -1.47 | 9.39  | 0.00434991 | AT2G30695 | CRK21__cysteine-rich RLK (RECEPTOR-like protein kinase) 21                                                                                                                                                                                                                                                                                                                                                                                                                            |
| -2.77 | 13.83 | -1.47 | 14.56 | 0.00162136 | AT4G23290 | phytochrome kinase substrate-related                                                                                                                                                                                                                                                                                                                                                                                                                                                  |
| -2.78 | 14.09 | -1.48 | 14.83 | 0.00758398 | AT1G18810 |                                                                                                                                                                                                                                                                                                                                                                                                                                                                                       |
| -2.78 | 13.56 | -1.48 | 14.29 | 0.00219513 | AT3G59778 |                                                                                                                                                                                                                                                                                                                                                                                                                                                                                       |
| -2.8  | 10.12 | -1.49 | 10.87 | 0.00508871 | AT3G19230 | Leucine-rich repeat (LRR) family protein                                                                                                                                                                                                                                                                                                                                                                                                                                              |

|       |       |       |       |            |           |                                                                                                                                                                                                                                                                                                                                              |
|-------|-------|-------|-------|------------|-----------|----------------------------------------------------------------------------------------------------------------------------------------------------------------------------------------------------------------------------------------------------------------------------------------------------------------------------------------------|
| -2.8  | 9.17  | -1.48 | 9.92  | 0.00472792 | AT4G34650 | SQS2__squalene synthase 2                                                                                                                                                                                                                                                                                                                    |
| -2.81 | 10.08 | -1.49 | 10.83 | 0.01121422 | AT4G14548 |                                                                                                                                                                                                                                                                                                                                              |
| -2.82 | 9.31  | -1.49 | 10.05 | 0.00695748 | AT1G51270 | structural molecules;transmembrane receptors;structural molecules                                                                                                                                                                                                                                                                            |
| -2.83 | 14.27 | -1.5  | 15.02 | 0.00539566 | AT3G24460 | Serinc-domain containing serine and sphingolipid biosynthesis protein                                                                                                                                                                                                                                                                        |
| -2.84 | 11.39 | -1.51 | 12.15 | 0.003464   | AT2G29370 | NAD(P)-binding Rossmann-fold superfamily protein                                                                                                                                                                                                                                                                                             |
| -2.84 | 8.89  | -1.51 | 9.64  | 0.00229082 | AT3G10590 | Duplicated homeodomain-like superfamily protein                                                                                                                                                                                                                                                                                              |
| -2.84 | 9.02  | -1.51 | 9.77  | 0.00388122 | AT3G14420 | Aldolase-type TIM barrel family protein Aldolase-type TIM barrel family protein                                                                                                                                                                                                                                                              |
| -2.84 | 11.01 | -1.5  | 11.76 | 0.03509508 | AT3G22640 | PAP85__cupin family protein                                                                                                                                                                                                                                                                                                                  |
| -2.84 | 11.2  | -1.51 | 11.96 | 0.02399778 | AT4G27360 | Dynein light chain type 1 family protein                                                                                                                                                                                                                                                                                                     |
|       |       |       |       |            |           | unknown protein; FUNCTIONS IN: molecular_function unknown; INVOLVED IN: biological_process unknown; LOCATED IN: endomembrane system; Has 186248 Blast hits to 53970 proteins in 2688 species: Archae - 469; Bacteria - 57770; Metazoa - 55630; Fungi - 12355; Plants - 17666; Viruses - 2624; Other Eukaryotes - 39734 (source: NCBI BLink). |
| -2.85 | 11.08 | -1.51 | 11.83 | 0.00539566 | AT1G62240 | Plants - 17666; Viruses - 2624; Other Eukaryotes - 39734 (source: NCBI BLink).                                                                                                                                                                                                                                                               |
| -2.85 | 12.94 | -1.51 | 13.69 | 0.00581265 | AT1G66540 | Cytochrome P450 superfamily protein Cytochrome P450 superfamily protein                                                                                                                                                                                                                                                                      |
| -2.85 | 12.86 | -1.51 | 13.62 | 0.00267504 | AT5G48920 | TED7__tracheary element differentiation-related 7                                                                                                                                                                                                                                                                                            |
| -2.85 | 11.03 | -1.51 | 11.79 | 0.00788305 | AT5G58140 | NPL1__PHOT2__phototropin 2                                                                                                                                                                                                                                                                                                                   |
| -2.85 | 9.17  | -1.51 | 9.92  | 0.00784132 | AT5G62100 | ATBAG2__BAG2__BCL-2-associated athanogene 2                                                                                                                                                                                                                                                                                                  |
| -2.86 | 11.08 | -1.51 | 11.83 | 0.00294186 | AT1G50280 | Phototropic-responsive NPH3 family protein                                                                                                                                                                                                                                                                                                   |
| -2.86 | 11.53 | -1.52 | 12.29 | 0.00605413 | AT3G10150 | ATPAP16__PAP16__purple acid phosphatase 16                                                                                                                                                                                                                                                                                                   |
| -2.86 | 14.13 | -1.51 | 14.89 | 0.00507786 | AT3G48310 | CYP71A22__cytochrome P450, family 71, subfamily A, polypeptide 22                                                                                                                                                                                                                                                                            |
| -2.87 | 11.57 | -1.52 | 12.33 | 0.00810235 | AT1G16090 | WAKL7__wall associated kinase-like 7                                                                                                                                                                                                                                                                                                         |
| -2.87 | 9.06  | -1.52 | 9.82  | 0.00683646 | AT1G65570 | Pectin lyase-like superfamily protein                                                                                                                                                                                                                                                                                                        |
| -2.87 | 8.93  | -1.52 | 9.69  | 0.01150797 | AT1G69720 | HO3__heme oxygenase 3 HO3__heme oxygenase 3                                                                                                                                                                                                                                                                                                  |
| -2.87 | 9.98  | -1.52 | 10.74 | 0.00326511 | AT1G76955 | Expressed protein                                                                                                                                                                                                                                                                                                                            |
| -2.87 | 12.82 | -1.52 | 13.58 | 0.02530678 | AT2G21330 | FBA1__fructose-bisphosphate aldolase 1                                                                                                                                                                                                                                                                                                       |
| -2.87 | 12.99 | -1.52 | 13.75 | 0.00306866 | AT2G29120 | ATGLR2.7__GLR2.7__glutamate receptor 2.7                                                                                                                                                                                                                                                                                                     |
| -2.87 | 9.47  | -1.52 | 10.23 | 0.00294186 | AT4G34320 | Protein of unknown function (DUF677)                                                                                                                                                                                                                                                                                                         |
| -2.87 | 8.84  | -1.52 | 9.6   | 0.00601931 | AT5G56700 | FBD / Leucine Rich Repeat domains containing protein                                                                                                                                                                                                                                                                                         |
|       |       |       |       |            |           | AGL3__SEP4__K-box region and MADS-box transcription factor family protein                                                                                                                                                                                                                                                                    |
|       |       |       |       |            |           | AGL3__SEP4__K-box region and MADS-box transcription factor family protein                                                                                                                                                                                                                                                                    |
|       |       |       |       |            |           | AGL3__SEP4__K-box region and MADS-box transcription factor family protein                                                                                                                                                                                                                                                                    |
| -2.88 | 12.01 | -1.53 | 12.77 | 0.00764879 | AT2G03710 |                                                                                                                                                                                                                                                                                                                                              |
| -2.88 | 12.71 | -1.53 | 13.47 | 0.00784613 | AT2G27395 |                                                                                                                                                                                                                                                                                                                                              |
| -2.88 | 8.98  | -1.53 | 9.74  | 0.00195989 | AT3G26125 | CYP86C2__cytochrome P450, family 86, subfamily C, polypeptide 2                                                                                                                                                                                                                                                                              |
| -2.88 | 12.81 | -1.53 | 13.57 | 0.01459363 | AT5G42760 | Leucine carboxyl methyltransferase                                                                                                                                                                                                                                                                                                           |
|       |       |       |       |            |           | unknown protein; FUNCTIONS IN: molecular_function unknown; INVOLVED IN: biological_process unknown; EXPRESSED IN: 17 plant structures; EXPRESSED DURING: 11                                                                                                                                                                                  |
| -2.89 | 11.17 | -1.53 | 11.94 | 0.00417125 | AT2G04790 |                                                                                                                                                                                                                                                                                                                                              |

|       |       |       |       |            |           |                                                                                                                                                                                                                                                                                                                                                                                                                                                                                                                                                                                                                                                                                                                                                                                                                                                                                                                                                                                                                                                                                                                                                                                                                                                                                                                                                                                                                                                                                                                                                                                               |
|-------|-------|-------|-------|------------|-----------|-----------------------------------------------------------------------------------------------------------------------------------------------------------------------------------------------------------------------------------------------------------------------------------------------------------------------------------------------------------------------------------------------------------------------------------------------------------------------------------------------------------------------------------------------------------------------------------------------------------------------------------------------------------------------------------------------------------------------------------------------------------------------------------------------------------------------------------------------------------------------------------------------------------------------------------------------------------------------------------------------------------------------------------------------------------------------------------------------------------------------------------------------------------------------------------------------------------------------------------------------------------------------------------------------------------------------------------------------------------------------------------------------------------------------------------------------------------------------------------------------------------------------------------------------------------------------------------------------|
|       |       |       |       |            |           | growth stages; Has 33 Blast hits to 33 proteins in 10 species: Archae - 0; Bacteria - 0; Metazoa - 0; Fungi - 0; Plants - 33; Viruses - 0; Other Eukaryotes - 0 (source: NCBI BLink). unknown protein; FUNCTIONS IN: molecular_function unknown; INVOLVED IN: biological_process unknown; EXPRESSED IN: 17 plant structures; EXPRESSED DURING: 11 growth stages; Has 33 Blast hits to 33 proteins in 10 species: Archae - 0; Bacteria - 0; Metazoa - 0; Fungi - 0; Plants - 33; Viruses - 0; Other Eukaryotes - 0 (source: NCBI BLink). unknown protein; FUNCTIONS IN: molecular_function unknown; INVOLVED IN: biological_process unknown; EXPRESSED IN: 17 plant structures; EXPRESSED DURING: 11 growth stages; Has 33 Blast hits to 33 proteins in 10 species: Archae - 0; Bacteria - 0; Metazoa - 0; Fungi - 0; Plants - 33; Viruses - 0; Other Eukaryotes - 0 (source: NCBI BLink). unknown protein; FUNCTIONS IN: molecular_function unknown; INVOLVED IN: biological_process unknown; EXPRESSED IN: 17 plant structures; EXPRESSED DURING: 11 growth stages; Has 33 Blast hits to 33 proteins in 10 species: Archae - 0; Bacteria - 0; Metazoa - 0; Fungi - 0; Plants - 33; Viruses - 0; Other Eukaryotes - 0 (source: NCBI BLink). unknown protein; FUNCTIONS IN: molecular_function unknown; INVOLVED IN: biological_process unknown; EXPRESSED IN: 17 plant structures; EXPRESSED DURING: 11 growth stages; Has 33 Blast hits to 33 proteins in 10 species: Archae - 0; Bacteria - 0; Metazoa - 0; Fungi - 0; Plants - 33; Viruses - 0; Other Eukaryotes - 0 (source: NCBI BLink). |
| -2.89 | 11.1  | -1.53 | 11.86 | 0.00583609 | AT2G45800 | PLIM2a__GATA type zinc finger transcription factor family protein PLIM2a__GATA type zinc finger transcription factor family protein                                                                                                                                                                                                                                                                                                                                                                                                                                                                                                                                                                                                                                                                                                                                                                                                                                                                                                                                                                                                                                                                                                                                                                                                                                                                                                                                                                                                                                                           |
| -2.89 | 8.07  | -1.53 | 8.83  | 0.00492377 | AT5G61910 | DCD (Development and Cell Death) domain protein<br>unknown protein; BEST Arabidopsis thaliana protein match is: unknown protein (TAIR:AT2G46550.1); Has 35333 Blast hits to 34131 proteins in 2444 species: Archae - 798; Bacteria - 22429; Metazoa - 974; Fungi - 991; Plants - 531; Viruses - 0; Other Eukaryotes - 9610 (source: NCBI BLink).                                                                                                                                                                                                                                                                                                                                                                                                                                                                                                                                                                                                                                                                                                                                                                                                                                                                                                                                                                                                                                                                                                                                                                                                                                              |
| -2.9  | 9.61  | -1.54 | 10.38 | 0.0030017  | AT1G01240 | FMN-linked oxidoreductases superfamily protein                                                                                                                                                                                                                                                                                                                                                                                                                                                                                                                                                                                                                                                                                                                                                                                                                                                                                                                                                                                                                                                                                                                                                                                                                                                                                                                                                                                                                                                                                                                                                |
| -2.9  | 11.29 | -1.54 | 12.06 | 0.00580211 | AT1G17990 | AGL29__AGAMOUS-like 29                                                                                                                                                                                                                                                                                                                                                                                                                                                                                                                                                                                                                                                                                                                                                                                                                                                                                                                                                                                                                                                                                                                                                                                                                                                                                                                                                                                                                                                                                                                                                                        |
| -2.91 | 9.83  | -1.54 | 10.61 | 0.01013972 | AT2G34440 | CYP71A25__cytochrome P450, family 71, subfamily A, polypeptide 25                                                                                                                                                                                                                                                                                                                                                                                                                                                                                                                                                                                                                                                                                                                                                                                                                                                                                                                                                                                                                                                                                                                                                                                                                                                                                                                                                                                                                                                                                                                             |
| -2.92 | 13.24 | -1.54 | 14.02 | 0.00179583 | AT3G48280 | Gibberellin-regulated family protein                                                                                                                                                                                                                                                                                                                                                                                                                                                                                                                                                                                                                                                                                                                                                                                                                                                                                                                                                                                                                                                                                                                                                                                                                                                                                                                                                                                                                                                                                                                                                          |
| -2.92 | 10.38 | -1.55 | 11.16 | 0.003464   | AT5G59845 | basic helix-loop-helix (bHLH) DNA-binding superfamily protein basic helix-loop-helix (bHLH)                                                                                                                                                                                                                                                                                                                                                                                                                                                                                                                                                                                                                                                                                                                                                                                                                                                                                                                                                                                                                                                                                                                                                                                                                                                                                                                                                                                                                                                                                                   |
| -2.93 | 10.02 | -1.55 | 10.79 | 0.04012296 | AT1G10586 | DNA-binding superfamily protein                                                                                                                                                                                                                                                                                                                                                                                                                                                                                                                                                                                                                                                                                                                                                                                                                                                                                                                                                                                                                                                                                                                                                                                                                                                                                                                                                                                                                                                                                                                                                               |
| -2.93 | 10.02 | -1.55 | 10.79 | 0.01304971 | AT4G04490 | CRK36__cysteine-rich RLK (RECEPTOR-like protein kinase) 36                                                                                                                                                                                                                                                                                                                                                                                                                                                                                                                                                                                                                                                                                                                                                                                                                                                                                                                                                                                                                                                                                                                                                                                                                                                                                                                                                                                                                                                                                                                                    |
| -2.94 | 9.04  | -1.55 | 9.82  | 0.00356968 | AT1G10657 | Plant protein 1589 of unknown function                                                                                                                                                                                                                                                                                                                                                                                                                                                                                                                                                                                                                                                                                                                                                                                                                                                                                                                                                                                                                                                                                                                                                                                                                                                                                                                                                                                                                                                                                                                                                        |
| -2.94 | 9.56  | -1.55 | 10.34 | 0.00434282 | AT1G76954 | Defensin-like (DEFL) family protein                                                                                                                                                                                                                                                                                                                                                                                                                                                                                                                                                                                                                                                                                                                                                                                                                                                                                                                                                                                                                                                                                                                                                                                                                                                                                                                                                                                                                                                                                                                                                           |
| -2.94 | 9.12  | -1.55 | 9.9   | 0.00735554 | AT3G48070 | RING/U-box superfamily protein                                                                                                                                                                                                                                                                                                                                                                                                                                                                                                                                                                                                                                                                                                                                                                                                                                                                                                                                                                                                                                                                                                                                                                                                                                                                                                                                                                                                                                                                                                                                                                |
| -2.94 | 12.14 | -1.56 | 12.92 | 0.00673815 | AT4G27820 | BGLU9__beta glucosidase 9                                                                                                                                                                                                                                                                                                                                                                                                                                                                                                                                                                                                                                                                                                                                                                                                                                                                                                                                                                                                                                                                                                                                                                                                                                                                                                                                                                                                                                                                                                                                                                     |
| -2.95 | 9.42  | -1.56 | 10.2  | 0.00421466 | AT3G29185 | Domain of unknown function (DUF3598)                                                                                                                                                                                                                                                                                                                                                                                                                                                                                                                                                                                                                                                                                                                                                                                                                                                                                                                                                                                                                                                                                                                                                                                                                                                                                                                                                                                                                                                                                                                                                          |
| -2.95 | 9.48  | -1.56 | 10.26 | 0.0029534  | AT3G57460 | catalytics;metal ion binding                                                                                                                                                                                                                                                                                                                                                                                                                                                                                                                                                                                                                                                                                                                                                                                                                                                                                                                                                                                                                                                                                                                                                                                                                                                                                                                                                                                                                                                                                                                                                                  |
| -2.95 | 10.52 | -1.56 | 11.3  | 0.01075468 | AT4G23150 | CRK7__cysteine-rich RLK (RECEPTOR-like protein kinase) 7                                                                                                                                                                                                                                                                                                                                                                                                                                                                                                                                                                                                                                                                                                                                                                                                                                                                                                                                                                                                                                                                                                                                                                                                                                                                                                                                                                                                                                                                                                                                      |
| -2.95 | 8.19  | -1.56 | 8.97  | 0.01191571 | AT5G13360 | Auxin-responsive GH3 family protein                                                                                                                                                                                                                                                                                                                                                                                                                                                                                                                                                                                                                                                                                                                                                                                                                                                                                                                                                                                                                                                                                                                                                                                                                                                                                                                                                                                                                                                                                                                                                           |

|       |       |       |       |            |           |                                                                                                                                                                                        |
|-------|-------|-------|-------|------------|-----------|----------------------------------------------------------------------------------------------------------------------------------------------------------------------------------------|
| -2.95 | 7.22  | -1.56 | 8     | 0.00479295 | AT5G56800 | Protein with RNI-like/FBD-like domains                                                                                                                                                 |
| -2.96 | 12.58 | -1.57 | 13.37 | 0.00543099 | AT2G29090 | CYP707A2__cytochrome P450, family 707, subfamily A, polypeptide 2                                                                                                                      |
| -2.96 | 11.56 | -1.57 | 12.34 | 0.00809014 | AT5G05420 | FKBP-like peptidyl-prolyl cis-trans isomerase family protein                                                                                                                           |
| -2.97 | 9.02  | -1.57 | 9.8   | 0.00702592 | AT1G53160 | SPL4__squamosa promoter binding protein-like 4 SPL4__squamosa promoter binding protein-like 4                                                                                          |
| -2.98 | 12.18 | -1.57 | 12.96 | 0.00288203 | AT1G31173 |                                                                                                                                                                                        |
| -2.98 | 9.25  | -1.57 | 10.04 | 0.02889784 | AT4G04510 | CRK38__cysteine-rich RLK (RECEPTOR-like protein kinase) 38                                                                                                                             |
| -2.99 | 13.2  | -1.58 | 13.99 | 0.0100502  | AT1G58520 | RXW8__lipases;hydrolases, acting on ester bonds                                                                                                                                        |
| -2.99 | 10.05 | -1.58 | 10.84 | 0.010454   | AT4G19820 | Glycosyl hydrolase family protein with chitinase insertion domain                                                                                                                      |
| -3.01 | 12.77 | -1.59 | 13.56 | 0.00394474 | AT1G76530 | Auxin efflux carrier family protein                                                                                                                                                    |
| -3.01 | 12.27 | -1.59 | 13.07 | 0.00309366 | AT3G20270 | lipid-binding serum glycoprotein family protein                                                                                                                                        |
| -3.03 | 11.39 | -1.6  | 12.19 | 0.00306866 | AT4G18425 | Protein of unknown function (DUF679)                                                                                                                                                   |
| -3.04 | 8.63  | -1.61 | 9.44  | 0.00229082 | AT2G03530 | ATUPS2_UPS2__ureide permease 2 ATUPS2_UPS2__ureide permease 2                                                                                                                          |
| -3.04 | 10.3  | -1.6  | 11.1  | 0.00542262 | AT2G06002 |                                                                                                                                                                                        |
| -3.04 | 8.51  | -1.6  | 9.32  | 0.00962279 | AT3G61230 | PLIM2c__GATA type zinc finger transcription factor family protein                                                                                                                      |
| -3.04 | 10.11 | -1.6  | 10.91 | 0.01500365 | AT4G04500 | CRK37__cysteine-rich RLK (RECEPTOR-like protein kinase) 37                                                                                                                             |
| -3.04 | 8.28  | -1.6  | 9.08  | 0.03649194 | AT5G05270 | Chalcone-flavanone isomerase family protein                                                                                                                                            |
| -3.05 | 13.1  | -1.61 | 13.91 | 0.0242498  | AT1G33960 | AIG1__P-loop containing nucleoside triphosphate hydrolases superfamily protein                                                                                                         |
| -3.05 | 11.46 | -1.61 | 12.27 | 0.00420969 | AT3G28140 | RNA ligase/cyclic nucleotide phosphodiesterase family protein RNA ligase/cyclic nucleotide phosphodiesterase family protein                                                            |
| -3.05 | 13.03 | -1.61 | 13.84 | 0.00608255 | AT4G13810 | AtRLP47_RLP47__receptor like protein 47                                                                                                                                                |
| -3.06 | 9.39  | -1.61 | 10.2  | 0.00999028 | AT1G79529 |                                                                                                                                                                                        |
| -3.06 | 8.93  | -1.61 | 9.74  | 0.00430342 | AT3G46375 |                                                                                                                                                                                        |
| -3.07 | 7.93  | -1.62 | 8.74  | 0.003464   | AT1G48610 | AT hook motif-containing protein                                                                                                                                                       |
| -3.07 | 9.51  | -1.62 | 10.32 | 0.00546655 | AT2G22200 | Integrase-type DNA-binding superfamily protein                                                                                                                                         |
| -3.07 | 8.58  | -1.62 | 9.39  | 0.00356968 | AT4G15710 | unknown protein; Has 18 Blast hits to 18 proteins in 2 species: Archae - 0; Bacteria - 0; Metazoa - 0; Fungi - 0; Plants - 18; Viruses - 0; Other Eukaryotes - 0 (source: NCBI BLink). |
| -3.08 | 10.61 | -1.63 | 11.42 | 0.00445289 | AT1G26208 |                                                                                                                                                                                        |
| -3.08 | 10.52 | -1.62 | 11.33 | 0.01967281 | AT5G49920 | Octicosapeptide/Phox/Bem1p family protein                                                                                                                                              |
| -3.08 | 10.86 | -1.62 | 11.67 | 0.01867869 | AT5G60900 | RLK1__receptor-like protein kinase 1                                                                                                                                                   |
| -3.09 | 11.7  | -1.63 | 12.52 | 0.00367141 | AT1G01390 | UDP-Glycosyltransferase superfamily protein                                                                                                                                            |
| -3.11 | 7.41  | -1.63 | 8.23  | 0.00779272 | AT3G26815 |                                                                                                                                                                                        |
| -3.11 | 10.28 | -1.64 | 11.1  | 0.00826348 | AT5G15800 | AGL2_SEP1__K-box region and MADS-box transcription factor family protein                                                                                                               |
| -3.12 | 9.47  | -1.64 | 10.29 | 0.01426607 | AT2G25780 | AGL2_SEP1__K-box region and MADS-box transcription factor family protein                                                                                                               |
| -3.13 | 8.64  | -1.65 | 9.46  | 0.00944571 | AT1G04880 | Protein of unknown function (DUF1677)                                                                                                                                                  |
|       |       |       |       |            |           | HMG (high mobility group) box protein with ARID/BRIGHT DNA-binding domain                                                                                                              |

|       |       |       |       |            |           |                                                                                                                                                                                                                                                                                                                                                                                                                                                                                                                                                                                                                                                                                                                                                                                                |
|-------|-------|-------|-------|------------|-----------|------------------------------------------------------------------------------------------------------------------------------------------------------------------------------------------------------------------------------------------------------------------------------------------------------------------------------------------------------------------------------------------------------------------------------------------------------------------------------------------------------------------------------------------------------------------------------------------------------------------------------------------------------------------------------------------------------------------------------------------------------------------------------------------------|
| -3.13 | 9.13  | -1.65 | 9.95  | 0.00253321 | AT1G32540 | LOL1__lsd one like 1                                                                                                                                                                                                                                                                                                                                                                                                                                                                                                                                                                                                                                                                                                                                                                           |
| -3.14 | 9.41  | -1.65 | 10.23 | 0.01304559 | AT3G48240 | Octicosapeptide/Phox/Bem1p family protein                                                                                                                                                                                                                                                                                                                                                                                                                                                                                                                                                                                                                                                                                                                                                      |
| -3.15 | 9.22  | -1.66 | 10.05 | 0.00323071 | AT2G39240 | RNA polymerase I specific transcription initiation factor RRN3 protein                                                                                                                                                                                                                                                                                                                                                                                                                                                                                                                                                                                                                                                                                                                         |
| -3.16 | 9.5   | -1.66 | 10.33 | 0.01023906 | AT1G66060 | Family of unknown function (DUF577)                                                                                                                                                                                                                                                                                                                                                                                                                                                                                                                                                                                                                                                                                                                                                            |
| -3.17 | 8.81  | -1.66 | 9.64  | 0.00487427 | AT1G07010 | AtSLP1_SLP1__Calcineurin-like metallo-phosphoesterase superfamily protein                                                                                                                                                                                                                                                                                                                                                                                                                                                                                                                                                                                                                                                                                                                      |
| -3.17 | 12.95 | -1.67 | 13.79 | 0.00286412 | AT4G36530 | alpha/beta-Hydrolases superfamily protein                                                                                                                                                                                                                                                                                                                                                                                                                                                                                                                                                                                                                                                                                                                                                      |
| -3.19 | 10.07 | -1.67 | 10.9  | 0.01226263 | AT3G15840 | PIFI__post-illumination chlorophyll fluorescence increase                                                                                                                                                                                                                                                                                                                                                                                                                                                                                                                                                                                                                                                                                                                                      |
| -3.2  | 9.76  | -1.68 | 10.6  | 0.00294186 | AT1G04640 | LIP2__lipoyltransferase 2                                                                                                                                                                                                                                                                                                                                                                                                                                                                                                                                                                                                                                                                                                                                                                      |
| -3.2  | 10.34 | -1.68 | 11.18 | 0.02236798 | AT1G64710 | GroES-like zinc-binding dehydrogenase family protein                                                                                                                                                                                                                                                                                                                                                                                                                                                                                                                                                                                                                                                                                                                                           |
| -3.2  | 11.71 | -1.68 | 12.55 | 0.01427376 | AT5G16960 | Zinc-binding dehydrogenase family protein                                                                                                                                                                                                                                                                                                                                                                                                                                                                                                                                                                                                                                                                                                                                                      |
| -3.21 | 9.78  | -1.68 | 10.62 | 0.01008356 | AT1G19640 | JMT__jasmonic acid carboxyl methyltransferase                                                                                                                                                                                                                                                                                                                                                                                                                                                                                                                                                                                                                                                                                                                                                  |
| -3.21 | 8.42  | -1.68 | 9.26  | 0.00947649 | AT1G25430 |                                                                                                                                                                                                                                                                                                                                                                                                                                                                                                                                                                                                                                                                                                                                                                                                |
| -3.21 | 7.71  | -1.68 | 8.55  | 0.00309366 | AT2G27030 | ACAM-2_CAM5__calmodulin 5                                                                                                                                                                                                                                                                                                                                                                                                                                                                                                                                                                                                                                                                                                                                                                      |
| -3.22 | 11    | -1.69 | 11.84 | 0.003464   | AT1G58889 |                                                                                                                                                                                                                                                                                                                                                                                                                                                                                                                                                                                                                                                                                                                                                                                                |
| -3.23 | 11.1  | -1.69 | 11.94 | 0.00315341 | AT2G29290 | NAD(P)-binding Rossmann-fold superfamily protein                                                                                                                                                                                                                                                                                                                                                                                                                                                                                                                                                                                                                                                                                                                                               |
| -3.23 | 9.44  | -1.69 | 10.29 | 0.02074873 | AT3G44350 | anac061_NAC061__NAC domain containing protein 61<br>unknown protein; FUNCTIONS IN: molecular_function unknown; INVOLVED IN:<br>biological_process unknown; BEST Arabidopsis thaliana protein match is: unknown protein<br>(TAIR:AT5G28960.1); Has 82 Blast hits to 80 proteins in 14 species: Archae - 0; Bacteria - 0;<br>Metazoa - 1; Fungi - 0; Plants - 78; Viruses - 0; Other Eukaryotes - 3 (source: NCBI BLink).<br>unknown protein; FUNCTIONS IN: molecular_function unknown; INVOLVED IN:<br>biological_process unknown; BEST Arabidopsis thaliana protein match is: unknown protein<br>(TAIR:AT5G28960.1); Has 82 Blast hits to 80 proteins in 14 species: Archae - 0; Bacteria - 0;<br>Metazoa - 1; Fungi - 0; Plants - 78; Viruses - 0; Other Eukaryotes - 3 (source: NCBI BLink). |
| -3.24 | 11.29 | -1.7  | 12.14 | 0.00451369 | AT5G28910 | Metazoa - 1; Fungi - 0; Plants - 78; Viruses - 0; Other Eukaryotes - 3 (source: NCBI BLink).                                                                                                                                                                                                                                                                                                                                                                                                                                                                                                                                                                                                                                                                                                   |
| -3.25 | 11.72 | -1.7  | 12.57 | 0.00413041 | AT1G69523 | S-adenosyl-L-methionine-dependent methyltransferases superfamily protein                                                                                                                                                                                                                                                                                                                                                                                                                                                                                                                                                                                                                                                                                                                       |
| -3.26 | 11.05 | -1.7  | 11.9  | 0.00562376 | AT1G53870 | Protein of unknown function (DUF567) Protein of unknown function (DUF567)                                                                                                                                                                                                                                                                                                                                                                                                                                                                                                                                                                                                                                                                                                                      |
| -3.27 | 10.18 | -1.71 | 11.03 | 0.01453255 | AT3G19270 | CYP707A4__cytochrome P450, family 707, subfamily A, polypeptide 4                                                                                                                                                                                                                                                                                                                                                                                                                                                                                                                                                                                                                                                                                                                              |
| -3.28 | 9.5   | -1.71 | 10.36 | 0.00610922 | AT2G29280 | unknown protein; Has 13 Blast hits to 13 proteins in 5 species: Archae - 0; Bacteria - 0; Metazoa - 0; Fungi - 0; Plants - 13; Viruses - 0; Other Eukaryotes - 0 (source: NCBI BLink).                                                                                                                                                                                                                                                                                                                                                                                                                                                                                                                                                                                                         |
| -3.28 | 9.62  | -1.71 | 10.48 | 0.00326511 | AT3G01960 | 0; Fungi - 0; Plants - 13; Viruses - 0; Other Eukaryotes - 0 (source: NCBI BLink).                                                                                                                                                                                                                                                                                                                                                                                                                                                                                                                                                                                                                                                                                                             |
| -3.28 | 10.3  | -1.71 | 11.16 | 0.00947254 | AT3G23120 | AtRLP38_RLP38__receptor like protein 38                                                                                                                                                                                                                                                                                                                                                                                                                                                                                                                                                                                                                                                                                                                                                        |
| -3.28 | 10.49 | -1.72 | 11.35 | 0.00269259 | AT4G09760 | Protein kinase superfamily protein                                                                                                                                                                                                                                                                                                                                                                                                                                                                                                                                                                                                                                                                                                                                                             |
| -3.28 | 8.48  | -1.71 | 9.34  | 0.003464   | AT5G53380 | O-acyltransferase (WSD1-like) family protein                                                                                                                                                                                                                                                                                                                                                                                                                                                                                                                                                                                                                                                                                                                                                   |
| -3.29 | 13.29 | -1.72 | 14.15 | 0.00507786 | AT3G28540 | P-loop containing nucleoside triphosphate hydrolases superfamily protein                                                                                                                                                                                                                                                                                                                                                                                                                                                                                                                                                                                                                                                                                                                       |
| -3.33 | 8.16  | -1.74 | 9.03  | 0.00517823 | AT3G51760 | Protein of unknown function (DUF688) Protein of unknown function (DUF688)                                                                                                                                                                                                                                                                                                                                                                                                                                                                                                                                                                                                                                                                                                                      |
| -3.35 | 7.69  | -1.75 | 8.56  | 0.01121422 | AT1G72980 | LBD7__LOB domain-containing protein 7                                                                                                                                                                                                                                                                                                                                                                                                                                                                                                                                                                                                                                                                                                                                                          |

|       |       |       |       |            |           |                                                                                                                                                                                                                                                                                                                                                                                                                                                                                                                                                                                                                                                                                   |
|-------|-------|-------|-------|------------|-----------|-----------------------------------------------------------------------------------------------------------------------------------------------------------------------------------------------------------------------------------------------------------------------------------------------------------------------------------------------------------------------------------------------------------------------------------------------------------------------------------------------------------------------------------------------------------------------------------------------------------------------------------------------------------------------------------|
| -3.35 | 9.91  | -1.75 | 10.79 | 0.00329522 | AT3G61430 | ATPIP1_PIP1_PIP1;1_PIP1A__plasma membrane intrinsic protein 1A<br>AGL3_SEP4__K-box region and MADS-box transcription factor family protein<br>AGL3_SEP4__K-box region and MADS-box transcription factor family protein                                                                                                                                                                                                                                                                                                                                                                                                                                                            |
| -3.37 | 11.84 | -1.75 | 12.72 | 0.00356968 | AT2G03710 | AGL3_SEP4__K-box region and MADS-box transcription factor family protein                                                                                                                                                                                                                                                                                                                                                                                                                                                                                                                                                                                                          |
| -3.37 | 10.89 | -1.75 | 11.76 | 0.01027468 | AT3G21890 | BBX31_B-box type zinc finger family protein                                                                                                                                                                                                                                                                                                                                                                                                                                                                                                                                                                                                                                       |
| -3.37 | 9.58  | -1.75 | 10.46 | 0.00742041 | AT3G26040 | HXXXD-type acyl-transferase family protein                                                                                                                                                                                                                                                                                                                                                                                                                                                                                                                                                                                                                                        |
| -3.37 | 9.43  | -1.75 | 10.31 | 0.00784768 | AT5G18407 | Defensin-like (DEFL) family protein                                                                                                                                                                                                                                                                                                                                                                                                                                                                                                                                                                                                                                               |
| -3.38 | 10.94 | -1.76 | 11.82 | 0.04871459 | AT4G15248 | BBX30_B-box type zinc finger family protein<br>unknown protein; BEST Arabidopsis thaliana protein match is: unknown protein<br>(TAIR:AT1G64680.1); Has 35333 Blast hits to 34131 proteins in 2444 species: Archae - 798;<br>Bacteria - 22429; Metazoa - 974; Fungi - 991; Plants - 531; Viruses - 0; Other Eukaryotes - 9610<br>(source: NCBI BLink). unknown protein; BEST Arabidopsis thaliana protein match is: unknown<br>protein (TAIR:AT1G64680.1); Has 35333 Blast hits to 34131 proteins in 2444 species: Archae -<br>798; Bacteria - 22429; Metazoa - 974; Fungi - 991; Plants - 531; Viruses - 0; Other Eukaryotes -                                                    |
| -3.39 | 10.71 | -1.76 | 11.59 | 0.00896923 | AT1G03055 | 9610 (source: NCBI BLink).                                                                                                                                                                                                                                                                                                                                                                                                                                                                                                                                                                                                                                                        |
| -3.39 | 10.59 | -1.76 | 11.47 | 0.03871652 | AT1G44575 | CP22_NPQ4_PSBS__Chlorophyll A-B binding family protein                                                                                                                                                                                                                                                                                                                                                                                                                                                                                                                                                                                                                            |
| -3.39 | 13.73 | -1.76 | 14.61 | 0.00358222 | AT4G14400 | ACD6__ankyrin repeat family protein                                                                                                                                                                                                                                                                                                                                                                                                                                                                                                                                                                                                                                               |
| -3.4  | 12.79 | -1.76 | 13.67 | 0.00221781 | AT1G69730 | Wall-associated kinase family protein                                                                                                                                                                                                                                                                                                                                                                                                                                                                                                                                                                                                                                             |
| -3.41 | 10.47 | -1.77 | 11.36 | 0.02152208 | AT1G18710 | AtMYB47_MYB47__myb domain protein 47                                                                                                                                                                                                                                                                                                                                                                                                                                                                                                                                                                                                                                              |
| -3.41 | 11.35 | -1.77 | 12.23 | 0.00294186 | AT3G59580 | Plant regulator RWP-RK family protein                                                                                                                                                                                                                                                                                                                                                                                                                                                                                                                                                                                                                                             |
| -3.41 | 8.21  | -1.77 | 9.09  | 0.00472051 | AT5G46871 | Putative membrane lipoprotein                                                                                                                                                                                                                                                                                                                                                                                                                                                                                                                                                                                                                                                     |
| -3.42 | 8.98  | -1.78 | 9.87  | 0.00392318 | AT3G13403 | Defensin-like (DEFL) family protein<br>unknown protein; FUNCTIONS IN: molecular_function unknown; INVOLVED IN:<br>biological_process unknown; BEST Arabidopsis thaliana protein match is: unknown protein<br>(TAIR:AT5G28960.1); Has 82 Blast hits to 80 proteins in 14 species: Archae - 0; Bacteria - 0;<br>Metazoa - 1; Fungi - 0; Plants - 78; Viruses - 0; Other Eukaryotes - 3 (source: NCBI BLink).<br>unknown protein; FUNCTIONS IN: molecular_function unknown; INVOLVED IN:<br>biological_process unknown; BEST Arabidopsis thaliana protein match is: unknown protein<br>(TAIR:AT5G28960.1); Has 82 Blast hits to 80 proteins in 14 species: Archae - 0; Bacteria - 0; |
| -3.44 | 11.29 | -1.78 | 12.18 | 0.00404197 | AT5G28910 | Metazoa - 1; Fungi - 0; Plants - 78; Viruses - 0; Other Eukaryotes - 3 (source: NCBI BLink).                                                                                                                                                                                                                                                                                                                                                                                                                                                                                                                                                                                      |
| -3.45 | 8.77  | -1.79 | 9.66  | 0.0039921  | AT2G14060 | S-adenosyl-L-methionine-dependent methyltransferases superfamily protein                                                                                                                                                                                                                                                                                                                                                                                                                                                                                                                                                                                                          |
| -3.45 | 10.19 | -1.78 | 11.08 | 0.01075069 | AT3G52310 | ABCG27__ABC-2 type transporter family protein                                                                                                                                                                                                                                                                                                                                                                                                                                                                                                                                                                                                                                     |
| -3.46 | 12.03 | -1.79 | 12.92 | 0.00835941 | AT2G32680 | AtRLP23_RLP23__receptor like protein 23<br>unknown protein; LOCATED IN: endomembrane system; Has 30201 Blast hits to 17322 proteins<br>in 780 species: Archae - 12; Bacteria - 1396; Metazoa - 17338; Fungi - 3422; Plants - 5037;<br>Viruses - 0; Other Eukaryotes - 2996 (source: NCBI BLink).                                                                                                                                                                                                                                                                                                                                                                                  |
| -3.46 | 7.71  | -1.79 | 8.61  | 0.00784132 | AT5G15853 | Viruses - 0; Other Eukaryotes - 2996 (source: NCBI BLink).                                                                                                                                                                                                                                                                                                                                                                                                                                                                                                                                                                                                                        |



|       |       |       |       |            |           |                                                                                                                                                                                                                                                                                                                                                                                                                                                                                                                                                                           |
|-------|-------|-------|-------|------------|-----------|---------------------------------------------------------------------------------------------------------------------------------------------------------------------------------------------------------------------------------------------------------------------------------------------------------------------------------------------------------------------------------------------------------------------------------------------------------------------------------------------------------------------------------------------------------------------------|
| -3.47 | 10.27 | -1.79 | 11.17 | 0.0075122  | AT3G23110 | AtRLP37_EMB2800_RLP37__receptor like protein 37                                                                                                                                                                                                                                                                                                                                                                                                                                                                                                                           |
| -3.48 | 8.45  | -1.8  | 9.35  | 0.03715538 | AT2G45560 | CYP76C1__cytochrome P450, family 76, subfamily C, polypeptide 1                                                                                                                                                                                                                                                                                                                                                                                                                                                                                                           |
| -3.48 | 10.92 | -1.8  | 11.82 | 0.0055488  | AT3G01480 | ATCYP38_CYP38__cyclophilin 38                                                                                                                                                                                                                                                                                                                                                                                                                                                                                                                                             |
| -3.49 | 11.05 | -1.8  | 11.95 | 0.01819975 | AT1G09080 | BIP3__Heat shock protein 70 (Hsp 70) family protein                                                                                                                                                                                                                                                                                                                                                                                                                                                                                                                       |
| -3.5  | 10.43 | -1.81 | 11.34 | 0.00294186 | AT3G01100 | ATHYP1_HYP1__hypothetical protein 1                                                                                                                                                                                                                                                                                                                                                                                                                                                                                                                                       |
| -3.5  | 11.27 | -1.81 | 12.17 | 0.00592108 | AT3G59250 | F-box/RNI-like superfamily protein                                                                                                                                                                                                                                                                                                                                                                                                                                                                                                                                        |
| -3.5  | 8.03  | -1.81 | 8.93  | 0.01377727 | AT4G32630 | ArfGap/RecO-like zinc finger domain-containing protein                                                                                                                                                                                                                                                                                                                                                                                                                                                                                                                    |
| -3.5  | 9.21  | -1.81 | 10.12 | 0.03578152 | AT5G59670 | Leucine-rich repeat protein kinase family protein                                                                                                                                                                                                                                                                                                                                                                                                                                                                                                                         |
| -3.51 | 7.78  | -1.81 | 8.68  | 0.03063386 | AT1G48020 | ATPMEI1_PMEI1__pectin methylesterase inhibitor 1                                                                                                                                                                                                                                                                                                                                                                                                                                                                                                                          |
| -3.51 | 10.45 | -1.81 | 11.36 | 0.00381387 | AT2G40020 | Nucleolar histone methyltransferase-related protein                                                                                                                                                                                                                                                                                                                                                                                                                                                                                                                       |
| -3.52 | 10.14 | -1.82 | 11.05 | 0.00978611 | AT3G21460 | Glutaredoxin family protein<br>unknown protein; BEST Arabidopsis thaliana protein match is: unknown protein<br>(TAIR:AT2G29620.1); Has 597 Blast hits to 536 proteins in 121 species: Archae - 2; Bacteria - 47; Metazoa - 170; Fungi - 43; Plants - 98; Viruses - 0; Other Eukaryotes - 237 (source: NCBI BLink).                                                                                                                                                                                                                                                        |
| -3.53 | 8.96  | -1.82 | 9.87  | 0.00681626 | AT1G07330 | ATRL6_RL6_RSM3__RAD-like 6                                                                                                                                                                                                                                                                                                                                                                                                                                                                                                                                                |
| -3.54 | 9.27  | -1.83 | 10.19 | 0.00411275 | AT1G75250 | YUC2__Flavin-binding monooxygenase family protein                                                                                                                                                                                                                                                                                                                                                                                                                                                                                                                         |
| -3.55 | 10.9  | -1.83 | 11.82 | 0.0040103  | AT4G13260 | unknown protein; EXPRESSED IN: 21 plant structures; EXPRESSED DURING: 13 growth stages; Has 35333 Blast hits to 34131 proteins in 2444 species: Archae - 798; Bacteria - 22429; Metazoa - 974; Fungi - 991; Plants - 531; Viruses - 0; Other Eukaryotes - 9610 (source: NCBI BLink). unknown protein; EXPRESSED IN: 21 plant structures; EXPRESSED DURING: 13 growth stages; Has 35333 Blast hits to 34131 proteins in 2444 species: Archae - 798; Bacteria - 22429; Metazoa - 974; Fungi - 991; Plants - 531; Viruses - 0; Other Eukaryotes - 9610 (source: NCBI BLink). |
| -3.57 | 11.26 | -1.84 | 12.18 | 0.00326047 | AT5G56850 | NCBI BLink).                                                                                                                                                                                                                                                                                                                                                                                                                                                                                                                                                              |
| -3.6  | 8.08  | -1.85 | 9     | 0.00329522 | AT5G26618 |                                                                                                                                                                                                                                                                                                                                                                                                                                                                                                                                                                           |
| -3.61 | 10.61 | -1.85 | 11.54 | 0.03203546 | AT1G69140 |                                                                                                                                                                                                                                                                                                                                                                                                                                                                                                                                                                           |
| -3.61 | 11.08 | -1.85 | 12.01 | 0.00627604 | AT4G26530 | Aldolase superfamily protein<br>Rhomboid-related intramembrane serine protease family protein Rhomboid-related intramembrane                                                                                                                                                                                                                                                                                                                                                                                                                                              |
| -3.61 | 13.15 | -1.85 | 14.07 | 0.00737142 | AT5G38510 | serine protease family protein                                                                                                                                                                                                                                                                                                                                                                                                                                                                                                                                            |
| -3.62 | 10.5  | -1.86 | 11.43 | 0.00592108 | AT4G38960 | BBX19_B-box type zinc finger family protein B-box type zinc finger family protein                                                                                                                                                                                                                                                                                                                                                                                                                                                                                         |
| -3.64 | 10.44 | -1.86 | 11.37 | 0.02093813 | AT1G18730 | NDF6_PnsB4__NDH dependent flow 6                                                                                                                                                                                                                                                                                                                                                                                                                                                                                                                                          |
| -3.65 | 8.12  | -1.87 | 9.06  | 0.00294186 | AT5G16023 | DVL1_RTFL18__ROTUNDIFOLIA like 18                                                                                                                                                                                                                                                                                                                                                                                                                                                                                                                                         |
| -3.66 | 11.59 | -1.87 | 12.53 | 0.00371237 | AT3G09160 | RNA-binding (RRM/RBD/RNP motifs) family protein                                                                                                                                                                                                                                                                                                                                                                                                                                                                                                                           |
| -3.66 | 8.52  | -1.87 | 9.45  | 0.0434544  | AT3G15536 |                                                                                                                                                                                                                                                                                                                                                                                                                                                                                                                                                                           |
| -3.67 | 9.38  | -1.88 | 10.32 | 0.01073689 | AT4G34240 | ALDH3_ALDH3I1__aldehyde dehydrogenase 3I1                                                                                                                                                                                                                                                                                                                                                                                                                                                                                                                                 |
| -3.68 | 10.7  | -1.88 | 11.64 | 0.00500089 | AT1G13130 | Cellulase (glycosyl hydrolase family 5) protein                                                                                                                                                                                                                                                                                                                                                                                                                                                                                                                           |

|       |       |       |       |            |           |                                                                                                                                                                                                                                      |
|-------|-------|-------|-------|------------|-----------|--------------------------------------------------------------------------------------------------------------------------------------------------------------------------------------------------------------------------------------|
| -3.68 | 12.62 | -1.88 | 13.56 | 0.0029534  | AT1G32780 | GroES-like zinc-binding dehydrogenase family protein<br>unknown protein; BEST Arabidopsis thaliana protein match is: unknown protein<br>(TAIR:AT1G68700.1); Has 35 Blast hits to 35 proteins in 8 species: Archae - 0; Bacteria - 0; |
| -3.69 | 7.69  | -1.89 | 8.63  | 0.00603002 | AT1G26140 | Metazoa - 0; Fungi - 0; Plants - 35; Viruses - 0; Other Eukaryotes - 0 (source: NCBI BLink).                                                                                                                                         |
| -3.69 | 8.82  | -1.88 | 9.76  | 0.00279459 | AT1G64770 | NDF2_NDH45_PnsB2__NDH-dependent cyclic electron flow 1                                                                                                                                                                               |
| -3.7  | 9.62  | -1.89 | 10.56 | 0.00309366 | AT1G22590 | AGL87__AGAMOUS-like 87 AGL87__AGAMOUS-like 87                                                                                                                                                                                        |
| -3.7  | 11.43 | -1.89 | 12.38 | 0.01528848 | AT5G66740 | Protein of unknown function (DUF620)                                                                                                                                                                                                 |
| -3.71 | 9.35  | -1.89 | 10.29 | 0.00965735 | AT1G76190 | SAUR-like auxin-responsive protein family                                                                                                                                                                                            |
| -3.72 | 7.25  | -1.9  | 8.2   | 0.0048338  | AT5G41780 | myosin heavy chain-related                                                                                                                                                                                                           |
| -3.77 | 8.56  | -1.91 | 9.51  | 0.00860028 | AT1G78290 | SNRK2-8_SNRK2.8_SRK2C__Protein kinase superfamily protein                                                                                                                                                                            |
| -3.78 | 9.94  | -1.92 | 10.9  | 0.00309366 | AT1G65790 | ARK1_RK1__receptor kinase 1                                                                                                                                                                                                          |
| -3.79 | 12.89 | -1.92 | 13.86 | 0.00426996 | AT5G59130 | Subtilase family protein                                                                                                                                                                                                             |
| -3.84 | 11.58 | -1.94 | 12.55 | 0.00605413 | AT1G43675 | CAP (Cysteine-rich secretory proteins, Antigen 5, and Pathogenesis-related 1 protein) superfamily protein                                                                                                                            |
| -3.85 | 9.38  | -1.94 | 10.35 | 0.04906014 | AT1G01310 | protein                                                                                                                                                                                                                              |
| -3.85 | 8.22  | -1.94 | 9.19  | 0.04063691 | AT1G13607 | Defensin-like (DEFL) family protein                                                                                                                                                                                                  |
| -3.86 | 13.37 | -1.95 | 14.35 | 0.00659732 | AT3G14420 | Aldolase-type TIM barrel family protein Aldolase-type TIM barrel family protein                                                                                                                                                      |
| -3.89 | 11.25 | -1.96 | 12.23 | 0.0284224  | AT4G17098 | Rhomboid-related intramembrane serine protease family protein Rhomboid-related intramembrane serine protease family protein                                                                                                          |
| -3.94 | 12.99 | -1.98 | 13.98 | 0.00367141 | AT5G38510 | ATCYSD2_CYSD2__cysteine synthase D2                                                                                                                                                                                                  |
| -3.95 | 10.38 | -1.98 | 11.37 | 0.00572337 | AT5G28020 | SRF4__STRUBBELIG-receptor family 4                                                                                                                                                                                                   |
| -3.97 | 11.3  | -1.99 | 12.29 | 0.00417125 | AT3G13065 |                                                                                                                                                                                                                                      |
| -3.97 | 10.42 | -1.99 | 11.42 | 0.01440026 | AT3G15310 |                                                                                                                                                                                                                                      |
| -3.99 | 10.23 | -2    | 11.23 | 0.01165814 | AT2G14560 | LURP1__Protein of unknown function (DUF567)                                                                                                                                                                                          |
| -4    | 12.16 | -2    | 13.16 | 0.01040772 | AT5G54610 | ANK__ankyrin                                                                                                                                                                                                                         |
| -4.01 | 11.46 | -2    | 12.46 | 0.021903   | AT1G01520 | ASG4__Homeodomain-like superfamily protein                                                                                                                                                                                           |
| -4.04 | 9.6   | -2.02 | 10.61 | 0.00411275 | AT3G55580 | Regulator of chromosome condensation (RCC1) family protein                                                                                                                                                                           |
| -4.11 | 11.1  | -2.04 | 12.12 | 0.00514085 | AT3G45860 | CRK4__cysteine-rich RLK (RECEPTOR-like protein kinase) 4                                                                                                                                                                             |
| -4.15 | 10.2  | -2.05 | 11.23 | 0.00250146 | AT1G45616 | AtRLP6_RLP6__receptor like protein 6                                                                                                                                                                                                 |
| -4.16 | 11.31 | -2.06 | 12.34 | 0.02979336 | AT4G35090 | CAT2__catalase 2                                                                                                                                                                                                                     |
| -4.18 | 12.64 | -2.06 | 13.67 | 0.00229082 | AT3G46370 | Leucine-rich repeat protein kinase family protein                                                                                                                                                                                    |
| -4.19 | 9.25  | -2.07 | 10.29 | 0.00326047 | AT3G27970 | Exonuclease family protein                                                                                                                                                                                                           |
| -4.22 | 8.42  | -2.08 | 9.46  | 0.00404197 | AT2G25095 | Cysteine proteinases superfamily protein                                                                                                                                                                                             |
| -4.26 | 7.69  | -2.09 | 8.74  | 0.00196725 | AT3G57810 | unknown protein; FUNCTIONS IN: molecular_function unknown; LOCATED IN: chloroplast;                                                                                                                                                  |
| -4.27 | 9.08  | -2.09 | 10.12 | 0.005834   | AT2G04039 | EXPRESSED IN: 21 plant structures; EXPRESSED DURING: 13 growth stages; CONTAINS                                                                                                                                                      |

|       |       |       |       |            |           |                                                                                                                                                                                                                                                                                                                             |
|-------|-------|-------|-------|------------|-----------|-----------------------------------------------------------------------------------------------------------------------------------------------------------------------------------------------------------------------------------------------------------------------------------------------------------------------------|
|       |       |       |       |            |           | InterPro DOMAIN/s: Protein of unknown function DUF2996 (InterPro:IPR021374); Has 38 Blast hits to 38 proteins in 13 species: Archae - 0; Bacteria - 0; Metazoa - 0; Fungi - 0; Plants - 38; Viruses - 0; Other Eukaryotes - 0 (source: NCBI BLink).                                                                         |
| -4.32 | 10.41 | -2.11 | 11.46 | 0.00663139 | AT5G65890 | ACR1__ACT domain repeat 1 ACR1__ACT domain repeat 1<br>unknown protein; Has 30201 Blast hits to 17322 proteins in 780 species: Archae - 12; Bacteria - 1396; Metazoa - 17338; Fungi - 3422; Plants - 5037; Viruses - 0; Other Eukaryotes - 2996 (source: NCBI BLink).                                                       |
| -4.34 | 10.61 | -2.12 | 11.67 | 0.00294186 | AT3G48298 | J20__DNAJ-like 20 J20__DNAJ-like 20                                                                                                                                                                                                                                                                                         |
| -4.34 | 9.3   | -2.12 | 10.35 | 0.0034714  | AT4G13830 | CCT motif family protein                                                                                                                                                                                                                                                                                                    |
| -4.38 | 8.43  | -2.13 | 9.5   | 0.04799851 | AT1G07050 | UGT73C2__UDP-glucosyl transferase 73C2                                                                                                                                                                                                                                                                                      |
| -4.42 | 10.32 | -2.15 | 11.39 | 0.00610922 | AT2G36760 | unknown protein; BEST Arabidopsis thaliana protein match is: unknown protein (TAIR:AT1G28630.4); Has 13187 Blast hits to 6837 proteins in 407 species: Archae - 0; Bacteria - 447; Metazoa - 4509; Fungi - 1333; Plants - 399; Viruses - 45; Other Eukaryotes - 6454 (source: NCBI BLink).                                  |
| -4.45 | 9.97  | -2.15 | 11.05 | 0.00566288 | AT1G77960 | DOT3__Phototropic-responsive NPH3 family protein                                                                                                                                                                                                                                                                            |
| -4.46 | 11.98 | -2.16 | 13.06 | 0.00356968 | AT5G10250 | RING/U-box superfamily protein                                                                                                                                                                                                                                                                                              |
| -4.5  | 9.98  | -2.17 | 11.06 | 0.02467735 | AT1G24580 | alpha/beta-Hydrolases superfamily protein                                                                                                                                                                                                                                                                                   |
| -4.54 | 9.24  | -2.18 | 10.33 | 0.00323071 | AT1G52510 | nodulin MtN21 /EamA-like transporter family protein                                                                                                                                                                                                                                                                         |
| -4.54 | 8.48  | -2.18 | 9.57  | 0.00449194 | AT3G28070 | ATRL5_RL5_RSM4__RAD-like 5                                                                                                                                                                                                                                                                                                  |
| -4.58 | 10.93 | -2.2  | 12.03 | 0.00926782 | AT1G19510 | Glycosyl hydrolase superfamily protein                                                                                                                                                                                                                                                                                      |
| -4.64 | 10.59 | -2.21 | 11.7  | 0.00050433 | AT4G33810 | RNA-binding protein                                                                                                                                                                                                                                                                                                         |
| -4.71 | 9.69  | -2.24 | 10.81 | 0.00294186 | AT5G05430 | unknown protein; FUNCTIONS IN: molecular_function unknown; INVOLVED IN: biological_process unknown; LOCATED IN: mitochondrion; Has 35333 Blast hits to 34131 proteins in 2444 species: Archae - 798; Bacteria - 22429; Metazoa - 974; Fungi - 991; Plants - 531; Viruses - 0; Other Eukaryotes - 9610 (source: NCBI BLink). |
| -4.72 | 8.99  | -2.24 | 10.11 | 0.00294186 | AT3G61898 | PMI2_WEB2__Plant protein of unknown function (DUF827)                                                                                                                                                                                                                                                                       |
| -4.73 | 12.08 | -2.24 | 13.2  | 0.00455724 | AT1G66840 | UGT73C1__UDP-glucosyl transferase 73C1                                                                                                                                                                                                                                                                                      |
| -4.82 | 8.97  | -2.27 | 10.1  | 0.00309366 | AT2G29165 | AGL2_SEP1__K-box region and MADS-box transcription factor family protein                                                                                                                                                                                                                                                    |
| -4.85 | 9.8   | -2.28 | 10.94 | 0.00102599 | AT1G29724 | AGL2_SEP1__K-box region and MADS-box transcription factor family protein                                                                                                                                                                                                                                                    |
| -5.04 | 12.21 | -2.33 | 13.37 | 0.01255441 | AT2G36750 | GDSL-like Lipase/Acylhydrolase superfamily protein                                                                                                                                                                                                                                                                          |
| -5.05 | 9.98  | -2.34 | 11.15 | 0.0039427  | AT5G15800 | BEST Arabidopsis thaliana protein match is: F-box family protein (TAIR:AT2G16365.3); Has 37 Blast hits to 37 proteins in 8 species: Archae - 0; Bacteria - 0; Metazoa - 0; Fungi - 0; Plants - 37; Viruses - 0; Other Eukaryotes - 0 (source: NCBI BLink).                                                                  |
| -5.13 | 10.57 | -2.36 | 11.75 | 0.00844279 | AT1G20120 | Ankyrin repeat family protein                                                                                                                                                                                                                                                                                               |
| -5.13 | 11.83 | -2.36 | 13.01 | 0.00877158 | AT4G34550 |                                                                                                                                                                                                                                                                                                                             |
| -5.22 | 9.82  | -2.38 | 11.01 | 0.00487529 | AT4G03450 |                                                                                                                                                                                                                                                                                                                             |

|       |       |       |       |            |           |                                                                                                                                                                                                                                                                                                                                                                                                                                                                                                                                                                                                                     |
|-------|-------|-------|-------|------------|-----------|---------------------------------------------------------------------------------------------------------------------------------------------------------------------------------------------------------------------------------------------------------------------------------------------------------------------------------------------------------------------------------------------------------------------------------------------------------------------------------------------------------------------------------------------------------------------------------------------------------------------|
| -5.23 | 8.55  | -2.39 | 9.75  | 0.03606894 | AT5G44430 | PDF1.2c__plant defensin 1.2C                                                                                                                                                                                                                                                                                                                                                                                                                                                                                                                                                                                        |
| -5.29 | 8.9   | -2.4  | 10.1  | 0.00294186 | AT1G22370 | AtUGT85A5__UGT85A5__UDP-glucosyl transferase 85A5                                                                                                                                                                                                                                                                                                                                                                                                                                                                                                                                                                   |
| -5.46 | 12.44 | -2.45 | 13.66 | 0.0052996  | AT2G27420 | Cysteine proteinases superfamily protein                                                                                                                                                                                                                                                                                                                                                                                                                                                                                                                                                                            |
| -5.53 | 10.78 | -2.47 | 12.01 | 0.00162136 | AT3G13062 | Polyketide cyclase/dehydrase and lipid transport superfamily protein                                                                                                                                                                                                                                                                                                                                                                                                                                                                                                                                                |
| -5.8  | 11.71 | -2.54 | 12.98 | 0.00346132 | AT2G32290 | BAM6_BMY5__beta-amylase 6                                                                                                                                                                                                                                                                                                                                                                                                                                                                                                                                                                                           |
| -5.84 | 10.57 | -2.55 | 11.85 | 0.0029534  | AT1G42560 | ATMLO9_MLO9__Seven transmembrane MLO family protein                                                                                                                                                                                                                                                                                                                                                                                                                                                                                                                                                                 |
| -5.86 | 11.41 | -2.55 | 12.69 | 0.02238487 | AT3G21660 | UBX domain-containing protein                                                                                                                                                                                                                                                                                                                                                                                                                                                                                                                                                                                       |
| -6.1  | 8.52  | -2.61 | 9.82  | 0.01547273 | AT3G21370 | BGLU19__beta glucosidase 19                                                                                                                                                                                                                                                                                                                                                                                                                                                                                                                                                                                         |
| -6.17 | 9.18  | -2.63 | 10.5  | 0.00294186 | AT3G52720 | ACA1_ATACA1_CAH1__alpha carbonic anhydrase 1<br>unknown protein; BEST Arabidopsis thaliana protein match is: unknown protein<br>(TAIR:AT5G64190.1); Has 72 Blast hits to 72 proteins in 10 species: Archae - 0; Bacteria - 0; Metazoa - 0; Fungi - 0; Plants - 72; Viruses - 0; Other Eukaryotes - 0 (source: NCBI BLink).                                                                                                                                                                                                                                                                                          |
| -6.49 | 13.45 | -2.7  | 14.8  | 0.00896923 | AT2G15020 | BEST Arabidopsis thaliana protein match is: 18S pre-ribosomal assembly protein gar2-related<br>(TAIR:AT2G03810.4); Has 3688 Blast hits to 1629 proteins in 255 species: Archae - 22; Bacteria - 222; Metazoa - 684; Fungi - 292; Plants - 62; Viruses - 14; Other Eukaryotes - 2392 (source: NCBI BLink). BEST Arabidopsis thaliana protein match is: 18S pre-ribosomal assembly protein gar2-related<br>(TAIR:AT2G03810.4); Has 3688 Blast hits to 1629 proteins in 255 species: Archae - 22; Bacteria - 222; Metazoa - 684; Fungi - 292; Plants - 62; Viruses - 14; Other Eukaryotes - 2392 (source: NCBI BLink). |
| -6.58 | 8.19  | -2.72 | 9.55  | 0.00196725 | AT1G13650 |                                                                                                                                                                                                                                                                                                                                                                                                                                                                                                                                                                                                                     |
| -6.76 | 9.5   | -2.76 | 10.88 | 0.04244268 | AT1G30390 | CONTAINS InterPro DOMAIN/s: Fusaric acid resistance protein, conserved region<br>(InterPro:IPR006726); BEST Arabidopsis thaliana protein match is: unknown protein<br>(TAIR:AT2G28780.1); Has 503 Blast hits to 494 proteins in 215 species: Archae - 0; Bacteria - 423; Metazoa - 0; Fungi - 0; Plants - 65; Viruses - 0; Other Eukaryotes - 15 (source: NCBI BLink).                                                                                                                                                                                                                                              |
| -6.86 | 10.68 | -2.78 | 12.07 | 0.00887205 | AT3G09450 |                                                                                                                                                                                                                                                                                                                                                                                                                                                                                                                                                                                                                     |

**Supplementary Table S3.** Gene Ontology analyses of NO-responsive genes.

<http://www.geneontology.org/>

|                                              |                                                      |          |            |              |                   |                      |                    |
|----------------------------------------------|------------------------------------------------------|----------|------------|--------------|-------------------|----------------------|--------------------|
| Analysis Type:                               | PANTHER Overrepresentation Test (Released 20171205)  |          |            |              |                   |                      |                    |
| Annotation Version and Release Date:         | GO Ontology database Released 2017-12-27             |          |            |              |                   |                      |                    |
| Analyzed List:                               | upload_1 NO-responsive at 1 h (Arabidopsis thaliana) |          |            |              |                   |                      |                    |
| Reference List:                              | Arabidopsis thaliana (all genes in database)         |          |            |              |                   |                      |                    |
| Test Type:                                   | FISHER                                               |          |            |              |                   |                      |                    |
| GO biological process complete               | thaliana                                             | upload_1 | upload_1   | upload_1     | upload_1          | upload_1             | upload_1           |
|                                              | REFLIST                                              |          |            |              |                   |                      |                    |
|                                              | (27502)                                              | 1101     | (expected) | (over/under) | (fold Enrichment) | (raw P-value)        | (FDR)              |
| response to stimulus (GO:0050896)            | 5805                                                 | 350      | 232.39     | +            | 1.51              | 0.000000000000000607 | 0.0000000000000336 |
| response to drug (GO:0042493)                | 529                                                  | 62       | 21.18      | +            | 2.93              | 0.000000000000107    | 0.000000000296     |
| response to chitin (GO:0010200)              | 132                                                  | 26       | 5.28       | +            | 4.92              | 0.0000000000396      | 0.00000073         |
| response to chemical (GO:0042221)            | 2762                                                 | 177      | 110.57     | +            | 1.6               | 0.00000000136        | 0.00000188         |
| defense response (GO:0006952)                | 1407                                                 | 104      | 56.33      | +            | 1.85              | 0.00000000848        | 0.00000938         |
| response to ethylene (GO:0009723)            | 297                                                  | 36       | 11.89      | +            | 3.03              | 0.0000000283         | 0.0000261          |
| response to organic substance (GO:0010033)   | 1947                                                 | 129      | 77.95      | +            | 1.66              | 0.0000000586         | 0.000036           |
| response to stress (GO:0006950)              | 3283                                                 | 195      | 131.43     | +            | 1.48              | 0.0000000555         | 0.0000384          |
| response to endogenous stimulus (GO:0009719) | 1680                                                 | 115      | 67.26      | +            | 1.71              | 0.0000000801         | 0.0000402          |

|                                                            |      |     |         |        |              |           |
|------------------------------------------------------------|------|-----|---------|--------|--------------|-----------|
| response to hormone<br>(GO:0009725)                        | 1672 | 115 | 66.94 + | 1.72   | 0.0000000544 | 0.000043  |
| chromosome organization<br>(GO:0051276)                    | 428  | 0   | 17.13 - | < 0.01 | 0.0000000784 | 0.0000433 |
| ethylene-activated signaling<br>pathway (GO:0009873)       | 174  | 25  | 6.97 +  | 3.59   | 0.000000218  | 0.0000927 |
| response to wounding<br>(GO:0009611)                       | 212  | 28  | 8.49 +  | 3.3    | 0.000000201  | 0.0000927 |
| response to organonitrogen<br>compound (GO:0010243)        | 190  | 26  | 7.61 +  | 3.42   | 0.000000294  | 0.000116  |
| phosphorelay signal<br>transduction system<br>(GO:0000160) | 214  | 27  | 8.57 +  | 3.15   | 0.000000741  | 0.000273  |
| cellular response to ethylene<br>stimulus (GO:0071369)     | 195  | 25  | 7.81 +  | 3.2    | 0.00000145   | 0.000502  |
| response to nitrogen compound<br>(GO:1901698)              | 297  | 32  | 11.89 + | 2.69   | 0.00000172   | 0.00056   |
| response to oxygen-containing<br>compound (GO:1901700)     | 1506 | 100 | 60.29 + | 1.66   | 0.00000251   | 0.000772  |
| response to abiotic stimulus<br>(GO:0009628)               | 1954 | 119 | 78.23 + | 1.52   | 0.0000108    | 0.00297   |
| oxidation-reduction process<br>(GO:0055114)                | 1331 | 88  | 53.28 + | 1.65   | 0.0000102    | 0.00298   |
| response to light stimulus<br>(GO:0009416)                 | 699  | 54  | 27.98 + | 1.93   | 0.0000126    | 0.00331   |
| secondary metabolic process<br>(GO:0019748)                | 475  | 41  | 19.02 + | 2.16   | 0.0000136    | 0.00342   |
| regulation of hormone levels<br>(GO:0010817)               | 380  | 35  | 15.21 + | 2.3    | 0.0000153    | 0.00368   |
| response to decreased oxygen<br>levels (GO:0036293)        | 70   | 13  | 2.8 +   | 4.64   | 0.0000165    | 0.00379   |
| amide biosynthetic process<br>(GO:0043604)                 | 618  | 6   | 24.74 - | 0.24   | 0.0000192    | 0.00379   |

|                                                              |      |     |         |        |           |         |
|--------------------------------------------------------------|------|-----|---------|--------|-----------|---------|
| response to oxygen levels<br>(GO:0070482)                    | 71   | 13  | 2.84 +  | 4.57   | 0.0000188 | 0.00385 |
| signal transduction<br>(GO:0007165)                          | 1625 | 102 | 65.05 + | 1.57   | 0.0000185 | 0.00393 |
| response to radiation<br>(GO:0009314)                        | 726  | 55  | 29.06 + | 1.89   | 0.000018  | 0.00398 |
| signaling (GO:0023052)                                       | 1655 | 103 | 66.26 + | 1.55   | 0.0000219 | 0.00417 |
| secondary metabolite<br>biosynthetic process<br>(GO:0044550) | 311  | 30  | 12.45 + | 2.41   | 0.0000269 | 0.0048  |
| response to acid chemical<br>(GO:0001101)                    | 1148 | 77  | 45.96 + | 1.68   | 0.0000262 | 0.00482 |
| chromatin organization<br>(GO:0006325)                       | 284  | 0   | 11.37 - | < 0.01 | 0.00003   | 0.00518 |
| response to hypoxia<br>(GO:0001666)                          | 64   | 12  | 2.56 +  | 4.68   | 0.0000318 | 0.00533 |
| cellular amide metabolic<br>process (GO:0043603)             | 716  | 9   | 28.66 - | 0.31   | 0.0000346 | 0.00562 |
| cell communication<br>(GO:0007154)                           | 1888 | 113 | 75.58 + | 1.5    | 0.0000393 | 0.00621 |
| hormone biosynthetic process<br>(GO:0042446)                 | 184  | 21  | 7.37 +  | 2.85   | 0.000047  | 0.00722 |
| organelle organization<br>(GO:0006996)                       | 1197 | 22  | 47.92 - | 0.46   | 0.0000489 | 0.0073  |
| intracellular signal<br>transduction (GO:0035556)            | 505  | 41  | 20.22 + | 2.03   | 0.000064  | 0.00932 |
| peptide biosynthetic process<br>(GO:0043043)                 | 567  | 6   | 22.7 -  | 0.26   | 0.0000671 | 0.00951 |
| translation (GO:0006412)                                     | 562  | 6   | 22.5 -  | 0.27   | 0.0000935 | 0.0129  |
| isoprenoid catabolic process<br>(GO:0008300)                 | 15   | 6   | 0.6 +   | 9.99   | 0.000106  | 0.0136  |
| terpenoid catabolic process<br>(GO:0016115)                  | 15   | 6   | 0.6 +   | 9.99   | 0.000106  | 0.0139  |

|                                                                 |      |     |          |      |          |        |
|-----------------------------------------------------------------|------|-----|----------|------|----------|--------|
| vesicle-mediated transport<br>(GO:0016192)                      | 369  | 2   | 14.77 -  | 0.14 | 0.000106 | 0.0143 |
| organonitrogen compound<br>biosynthetic process<br>(GO:1901566) | 1293 | 26  | 51.76 -  | 0.5  | 0.000126 | 0.0159 |
| cellular response to hypoxia<br>(GO:0071456)                    | 26   | 7   | 1.04 +   | 6.73 | 0.000218 | 0.0268 |
| response to external stimulus<br>(GO:0009605)                   | 1520 | 91  | 60.85 +  | 1.5  | 0.000236 | 0.0284 |
| cellular response to decreased<br>oxygen levels (GO:0036294)    | 28   | 7   | 1.12 +   | 6.24 | 0.000321 | 0.0362 |
| cellular response to oxygen<br>levels (GO:0071453)              | 28   | 7   | 1.12 +   | 6.24 | 0.000321 | 0.037  |
| biological regulation<br>(GO:0065007)                           | 5517 | 271 | 220.86 + | 1.23 | 0.000318 | 0.0374 |
| cellular response to hormone<br>stimulus (GO:0032870)           | 838  | 56  | 33.55 +  | 1.67 | 0.000377 | 0.0409 |
| peptide metabolic process<br>(GO:0006518)                       | 639  | 9   | 25.58 -  | 0.35 | 0.000385 | 0.0409 |
| response to jasmonic acid<br>(GO:0009753)                       | 211  | 21  | 8.45 +   | 2.49 | 0.000377 | 0.0417 |



**Supplementary Table S4.** TPT lines that were screened for differential effect of NO on hypocotyl elongation under darkness. The 968 TPT lines displayed in this table and expressing 363 TFs under a  $\beta$ -estradiol inducible promoter were screened for hypocotyl length in etiolated seedlings grown in media supplemented or not with 10  $\mu$ M  $\beta$ -estradiol and each of them treated or not with 300 ppm NO

| AGI code  | Annotation                                                                        | TPT lines    |              |             |             |             |  |
|-----------|-----------------------------------------------------------------------------------|--------------|--------------|-------------|-------------|-------------|--|
| AT1G67970 | AT-HSFA8_HSFA8__heat shock transcription factor A8                                | 1.67970.1B4  | 1.67970.1E3  | 1.67970.1F4 |             |             |  |
| AT2G18300 | basic helix-loop-helix (bHLH) DNA-binding superfamily protein                     | 2.18300.1B1  | 2.18300.1C3  | 2.18300.1I6 |             |             |  |
| AT2G33880 | HB-3_STIP_WOX9_WOX9A__homeobox-3                                                  | 2.33880.1A2  | 2.33880.1C6  | 2.33880.1E2 |             |             |  |
| AT2G37000 | TCP family transcription factor                                                   | 2.37000.1A3  | 2.37000.1B2  |             |             |             |  |
| AT3G04730 | IAA16__indoleacetic acid-induced protein 16                                       | 3.04730.1A8  | 3.04730.1B2  | 3.04730.1D9 |             |             |  |
| AT3G16770 | ATEBP_EBP_ERF72_RAP2.3__ethylene-responsive element binding protein               | 3.16770.1A9  | 3.16770.1C8  | 3.16770.1D7 |             |             |  |
| AT3G45150 | TCP16__TCP domain protein 16                                                      | 3.45150.1B2  | 3.45150.1I4  |             |             |             |  |
| AT4G11880 | AGL14__AGAMOUS-like 14                                                            | 4.11880.1D2  | 4.11880.1H4  |             |             |             |  |
| AT4G17490 | ATERF6_ERF-6-6_ERF6__ethylene responsive element binding factor 6                 | 4.17490.1A6  | 4.17490.1B8  | 4.17490.1D5 | 4.17490.1E1 |             |  |
| AT4G18880 | AT-HSFA4A_HSF A4A__heat shock transcription factor A4A                            | 4.18880.1C1  | 4.18880.1E2  | 4.18880.1F3 |             |             |  |
| AT4G36540 | BEE2__BR enhanced expression 2                                                    | 4.36540.1B8  | 4.36540.1C1  | 4.36540.1E4 |             |             |  |
| AT5G10140 | AGL25_FLC_FLC_FLF__K-box region and MADS-box transcription factor family protein  | 5.10140.1B2  | 5.10140.1D5  | 5.10140.1E6 |             |             |  |
| AT5G18270 | ANAC087__Arabidopsis NAC domain containing protein 87                             | 5.18270.1A4  | 5.18270.1B8  | 5.18270.1C1 |             |             |  |
| AT5G23260 | ABS_AGL32_TT16__K-box region and MADS-box transcription factor family protein     | 5.23260.1E2  | 5.23260.1F5  | 5.23260.1I3 |             |             |  |
| AT5G51870 | AGL71__AGAMOUS-like 71                                                            | 5.51870.1D7  | 5.51870.1E1  | 5.51870.1F8 |             |             |  |
| AT5G55690 | MADS-box transcription factor family protein                                      | 5.55690.1A3  | 5.55690.1C4  | 5.55690.1G5 |             |             |  |
| AT5G65050 | AGL31_MAF2__AGAMOUS-like 31                                                       | 5.65050.1A2  | 5.65050.1C5  | 5.65050.1E4 |             |             |  |
| AT1G30210 | ATTCP24_TCP24__TEOSINTE BRANCHED 1, cycloidea, and PCF family 24                  | 1.30210.1D2  | 1.30210.1F5  |             |             |             |  |
| AT1G35560 | TCP family transcription factor                                                   | 1.35560.1C4  | 1.35560.1F1  | 1.35560.1G5 |             |             |  |
| AT1G50420 | SCL-3_SCL3__scarecrow-like 3                                                      | 1.50420.1A2  | 1.50420.1E5  |             |             |             |  |
| AT1G67260 | TCP1__TCP family transcription factor                                             | 1.67260.1B5  | 1.67260.1C7  | 1.67260.1D4 |             |             |  |
| AT1G72010 | TCP family transcription factor                                                   | 1.72010.1D4  | 1.72010.1G9  |             |             |             |  |
| AT3G05200 | ATL6__RING/U-box superfamily protein                                              | 3.05200.1B20 | 3.05200.1D17 | 3.05200.1J3 | 3.05200.1K7 | 3.05200.1L3 |  |
| AT3G27010 | AT-TCP20_PCF1__TEOSINTE BRANCHED 1, cycloidea, PCF (TCP)-domain family protein 20 | 3.27010.1A3  | 3.27010.1E2  | 3.27010.1F4 | 3.27010.1G1 |             |  |
| AT3G46600 | GRAS family transcription factor                                                  | 3.46600.1C4  | 3.46600.1D3  | 3.46600.1F3 | 3.46600.1G2 |             |  |
| AT3G60630 | ATHAM2_HAM2_LOM2__GRAS family transcription factor                                | 3.60630.1B4  | 3.60630.1C8  | 3.60630.1E8 |             |             |  |
| AT4G00050 | UNE10__basic helix-loop-helix (bHLH) DNA-binding superfamily protein              | 4.00050.1F24 | 4.00050.1G2  | 4.00050.1J7 |             |             |  |

|           |                                                                                  |              |              |              |              |             |             |
|-----------|----------------------------------------------------------------------------------|--------------|--------------|--------------|--------------|-------------|-------------|
| AT4G18390 | TCP2_TCP2_TEOSINTE BRANCHED 1, cycloidea and PCF transcription factor 2          | 4.18390.1H5  |              |              |              |             |             |
| AT4G18770 | AtMYB98_MYB98_myb domain protein 98                                              | 4.18770.1A3  | 4.18770.1B6  |              |              |             |             |
| AT5G08070 | TCP17_TCP domain protein 17                                                      | 5.08070.1B3  | 5.08070.1D4  |              |              |             |             |
| AT5G11050 | AtMYB64_MYB64_myb domain protein 64                                              | 5.11050.1D15 |              |              |              |             |             |
| AT5G49330 | ATMYB111_MYB111_PFG3_myb domain protein 111                                      | 5.49330.1C5  | 5.49330.1D5  | 5.49330.1E6  |              |             |             |
| AT5G51910 | TCP family transcription factor                                                  | 5.51910.1B3  | 5.51910.1D1  | 5.51910.1G2  | 5.51910.1H2  |             |             |
| AT5G52510 | SCL8_SCARECROW-like 8                                                            | 5.52510.1B2  | 5.52510.1E3  | 5.52510.1H1  |              |             |             |
| AT5G60970 | TCP5_TEOSINTE BRANCHED 1, cycloidea and PCF transcription factor 5               | 5.60970.1C8  | 5.60970.1F5  | 5.60970.1G7  |              |             |             |
| AT1G51950 | IAA18_indole-3-acetic acid inducible 18                                          | 1.51950.1A9  | 1.51950.1B8  |              |              |             |             |
| AT1G52890 | ANAC019_NAC019_NAC domain containing protein 19                                  | 1.52890.1B3  | 1.52890.1H2  |              |              |             |             |
| AT1G53910 | RAP2.12_related to AP2 12                                                        | 1.53910.1A6  | 1.53910.1B1  | 1.53910.1I4  |              |             |             |
| AT2G22630 | AGL17_AGAMOUS-like 17                                                            | 2.22630.1A4  | 2.22630.1C9  | 2.22630.1G9  | 2.22630.1H4  |             |             |
| AT3G04060 | anac046_NAC046_NAC domain containing protein 46                                  | 3.04060.1B8  | 3.04060.1D4  |              |              |             |             |
| AT3G23050 | AXR2_IAA7_indole-3-acetic acid 7                                                 | 3.23050.1H3  | 3.23050.1I9  |              |              |             |             |
| AT3G57230 | AGL16_AGAMOUS-like 16                                                            | 3.57230.1A6  | 3.57230.1C8  |              |              |             |             |
| AT4G17500 | ATERF-1_ERF-1_ethylene responsive element binding factor 1                       | 4.17500.1B3  | 4.17500.1E2  | 4.17500.1I7  |              |             |             |
| AT4G27410 | ANAC072_RD26                                                                     | 4.27410.1C2  | 4.27410.1D1  |              |              |             |             |
| AT4G34410 | RRTF1_redox responsive transcription factor 1                                    | 4.34410.1C1  | 4.34410.1G1  | 4.34410.1H2  |              |             |             |
| AT4G36710 | AtHAM4_HAM4_GRAS family transcription factor                                     | 4.36710.1B2  | 4.36710.1C6  | 4.36710.1D7  | 4.36710.1G3  | 4.36710.1H1 | 4.36710.1I9 |
| AT5G11060 | KNAT4_KNOTTED1-like homeobox gene 4                                              | 5.11060.1B3  | 5.11060.1D5  | 5.11060.1G4  |              |             |             |
| AT5G13790 | AGL15_AGAMOUS-like 15                                                            | 5.13790.1D4  | 5.13790.1F6  | 5.13790.1G3  |              |             |             |
| AT5G47230 | ATERF-5_ATERF5_ERF5_ethylene responsive element binding factor 5                 | 5.47230.1B1  | 5.47230.1C3  | 5.47230.1E4  | 5.47230.1G5  |             |             |
| AT5G53420 | CCT motif family protein                                                         | 5.53420.1F9  | 5.53420.1G2  | 5.53420.1I1  |              |             |             |
| AT5G62020 | AT-HSFB2A_HSFB2A_heat shock transcription factor B2A                             | 5.62020.1B4  | 5.62020.1F8  | 5.62020.1I3  |              |             |             |
| AT5G66160 | ATMR1_RMR1_receptor homology region transmembrane domain ring H2 motif protein 1 | 5.66160.1D1  | 5.66160.1G2  |              |              |             |             |
| AT1G01260 | basic helix-loop-helix (bHLH) DNA-binding superfamily protein                    | 1.01260.2C3  | 1.01260.2G5  | 1.01260.2I7  |              |             |             |
| AT1G63840 | RING/U-box superfamily protein                                                   | 1.63840.1E3  | 1.63840.1I5  |              |              |             |             |
| AT1G69490 | ANAC029_ATNAP_NAP_NAC-like, activated by AP3/PI                                  | 1.69490.1A99 | 1.69490.1B99 | 1.69490.1C99 | 1.69490.1H99 |             |             |
| AT1G80400 | RING/U-box superfamily protein                                                   | 1.80400.1A3  | 1.80400.1G8  | 1.80400.1H6  |              |             |             |
| AT2G20180 | PIF1_PIL5_phytochrome interacting factor 3-like 5                                | 2.20180.1D5  | 2.20180.1F5  | 2.20180.1G6  |              |             |             |
| AT2G22750 | basic helix-loop-helix (bHLH) DNA-binding superfamily protein                    | 2.22750.2G6  |              |              |              |             |             |
| AT3G15500 | ANAC055_ATNAC3_NAC055_NAC3_NAC domain containing protein 3                       | 3.15500.1A99 |              |              |              |             |             |
| AT3G56970 | BHLH038_ORG2_basic helix-loop-helix (bHLH) DNA-binding superfamily protein       | 3.56970.1D99 | 3.56970.1E99 | 3.56970.1G99 | 3.56970.1H99 |             |             |
| AT3G61150 | HD-GL2-1_HDG1_homeodomain GLABROUS 1                                             | 3.61150.1A3  | 3.61150.1B6  | 3.61150.1D7  |              |             |             |
| AT3G61460 | BRH1_brassinosteroid-responsive RING-H2                                          | 3.61460.1E6  | 3.61460.1G7  | 3.61460.1H2  |              |             |             |
| AT3G62690 | ATL5_AtL5                                                                        | 3.62690.1F8  | 3.62690.1K3  | 3.62690.1Q8  |              |             |             |

|           |                                                                        |              |              |              |             |  |
|-----------|------------------------------------------------------------------------|--------------|--------------|--------------|-------------|--|
| AT4G09180 | basic helix-loop-helix (bHLH) DNA-binding superfamily protein          | 4.09180.1B2  | 4.09180.1C8  |              |             |  |
| AT4G11680 | Zinc finger, C3HC4 type (RING finger) family protein                   | 4.11680.1F7  | 4.11680.1G9  | 4.11680.1I2  |             |  |
| AT4G14550 | IAA14_SLR__indole-3-acetic acid inducible 14                           | 4.14550.1B9  | 4.14550.1C2  | 4.14550.1J9  |             |  |
| AT4G36060 | bHLH11__basic helix-loop-helix (bHLH) DNA-binding superfamily protein  | 4.36060.1A7  | 4.36060.1C8  | 4.36060.1H7  |             |  |
| AT5G02470 | DPA__Transcription factor DP                                           | 5.02470.1D99 | 5.02470.1E99 | 5.02470.1F99 |             |  |
| AT5G03510 | C2H2-type zinc finger family protein                                   | 5.03510.1B99 | 5.03510.1F99 | 5.03510.1G99 |             |  |
| AT5G10380 | ATRINGER1_RING1__RING/U-box superfamily protein                        | 5.10380.1B8  | 5.10380.1C7  | 5.10380.1I2  |             |  |
| AT1G69180 | CRC__Plant-specific transcription factor YABBY family protein          | 1.69180.1G1  | 1.69180.1I1  |              |             |  |
| AT1G70510 | ATK1_KNAT2__KNOTTED-like from Arabidopsis thaliana 2                   | 1.70510.1B1  | 1.70510.1E7  | 1.70510.1F5  |             |  |
| AT2G18670 | RING/U-box superfamily protein                                         | 2.18670.1A1  | 2.18670.1B4  |              |             |  |
| AT2G22850 | AtbZIP6_bZIP6__basic leucine-zipper 6                                  | 2.22850.1A3  | 2.22850.1E1  | 2.22850.1F1  | 2.22850.1H9 |  |
| AT2G26580 | YAB5__plant-specific transcription factor YABBY family protein         | 2.26580.1B1  |              |              |             |  |
| AT2G45190 | AFO_FIL_YAB1__Plant-specific transcription factor YABBY family protein | 2.45190.1C3  | 2.45190.1F3  |              |             |  |
| AT2G45680 | TCP family transcription factor                                        | 2.45680.1A4  | 2.45680.1D2  |              |             |  |
| AT3G07650 | COL9__CONSTANS-like 9                                                  | 3.07650.1D6  | 3.07650.1F8  |              |             |  |
| AT3G12820 | AtMYB10_MYB10__myb domain protein 10                                   | 3.12820.1A5  | 3.12820.1G1  | 3.12820.1H1  |             |  |
| AT3G15170 | ANAC054_ATNAC1_CUC1                                                    | 3.15170.1B6  | 3.15170.1C8  | 3.15170.1G5  |             |  |
| AT3G18400 | anac058_NAC058__NAC domain containing protein 58                       | 3.18400.1D3  | 3.18400.1G9  |              |             |  |
| AT3G62550 | Adenine nucleotide alpha hydrolases-like superfamily protein           | 3.62550.1A1  | 3.62550.1C2  |              |             |  |
| AT4G23750 | CRF2_TMO3__cytokinin response factor 2                                 | 4.23750.2B3  | 4.23750.2C8  | 4.23750.2F7  |             |  |
| AT5G04410 | anac078_NAC2__NAC domain containing protein 2                          | 5.04410.1D6  | 5.04410.1G6  |              |             |  |
| AT5G06950 | AHBP-1B_TGA2__bZIP transcription factor family protein                 | 5.06950.1C5  | 5.06950.1D9  | 5.06950.1I7  |             |  |
| AT5G49450 | AtbZIP1_bZIP1__basic leucine-zipper 1                                  | 5.49450.1C1  | 5.49450.1D4  |              |             |  |
| AT1G07530 | ATGRAS2_GRAS2_SCL14__SCARECROW-like 14                                 | 1.07530.1B99 | 1.07530.1E99 |              |             |  |
| AT1G55580 | LAS_SCL18__GRAS family transcription factor                            | 1.55580.1A3  | 1.55580.1D9  |              |             |  |
| AT1G55760 | BTB/POZ domain-containing protein                                      | 1.55760.1A5  | 1.55760.1C5  | 1.55760.1E4  |             |  |
| AT2G17180 | DAZ1__C2H2-like zinc finger protein                                    | 2.17180.1E6  | 2.17180.1F3  | 2.17180.1H4  |             |  |
| AT2G24790 | ATCOL3_COL3__CONSTANS-like 3                                           | 2.24790.1A3  | 2.24790.1H2  |              |             |  |
| AT2G25000 | ATWRKY60_WRKY60__WRKY DNA-binding protein 60                           | 2.25000.1C5  | 2.25000.1D5  | 2.25000.1E6  | 2.25000.1H4 |  |
| AT2G33710 | Integrase-type DNA-binding superfamily protein                         | 2.33710.1C1  | 2.33710.1E7  | 2.33710.1G2  | 2.33710.1H6 |  |
| AT2G38340 | DREB19__Integrase-type DNA-binding superfamily protein                 | 2.38340.1B7  | 2.38340.1I9  |              |             |  |
| AT3G01220 | ATHB20_HB20__homeobox protein 20                                       | 3.01220.1D1  | 3.01220.1E2  | 3.01220.1I6  |             |  |
| AT3G03450 | RGL2__RGA-like 2                                                       | 3.03450.1C99 | 3.03450.1F99 | 3.03450.1H99 |             |  |
| AT3G10480 | ANAC050_NAC050__NAC domain containing protein 50                       | 3.10480.1D3  | 3.10480.1E3  |              |             |  |
| AT3G11580 | AP2/B3-like transcriptional factor family protein                      | 3.11580.1A5  | 3.11580.1E6  |              |             |  |
| AT4G31800 | ATWRKY18_WRKY18__WRKY DNA-binding protein 18                           | 4.31800.1C99 | 4.31800.1E99 |              |             |  |

|           |                                                                   |             |              |             |             |             |  |
|-----------|-------------------------------------------------------------------|-------------|--------------|-------------|-------------|-------------|--|
| AT4G36900 | DEAR4_RAP2.10__related to AP2 10                                  | 4.36900.1A3 | 4.36900.1B2  | 4.36900.1E1 | 4.36900.1I2 |             |  |
| AT5G03790 | ATHB51_HB51_LMI1__homeobox 51                                     | 5.03790.1E8 | 5.03790.1F1  |             |             |             |  |
| AT5G13080 | ATWRKY75_WRKY75__WRKY DNA-binding protein 75                      | 5.13080.1G9 | 5.13080.1H5  |             |             |             |  |
| AT5G22220 | ATE2FB_E2F1_E2FB__E2F transcription factor 1                      | 5.22220.1D6 | 5.22220.1E7  | 5.22220.1I4 |             |             |  |
| AT5G43290 | ATWRKY49_WRKY49__WRKY DNA-binding protein 49                      | 5.43290.1A6 | 5.43290.1D2  |             |             |             |  |
| AT1G56160 | ATMYB72_MYB72__myb domain protein 72                              | 1.56160.1B6 | 1.56160.1C2  | 1.56160.1E2 | 1.56160.1G5 |             |  |
| AT1G68520 | B-box type zinc finger protein with CCT domain                    | 1.68520.1H3 |              |             |             |             |  |
| AT1G71130 | CRF8__Integrase-type DNA-binding superfamily protein              | 1.71130.1C4 | 1.71130.1F4  | 1.71130.1H9 |             |             |  |
| AT1G71450 | Integrase-type DNA-binding superfamily protein                    | 1.71450.1D2 | 1.71450.1I5  |             |             |             |  |
| AT1G79180 | ATMYB63_MYB63__myb domain protein 63                              | 1.79180.1E3 |              |             |             |             |  |
| AT3G01970 | ATWRKY45_WRKY45__WRKY DNA-binding protein 45                      | 3.01970.1C5 | 3.01970.1D6  | 3.01970.1F5 |             |             |  |
| AT3G05700 | Drought-responsive family protein                                 | 3.05700.1D4 | 3.05700.1E1  | 3.05700.1F4 | 3.05700.1G6 |             |  |
| AT3G11260 | WOX5_WOX5B__WUSCHEL related homeobox 5                            | 3.11260.1A4 | 3.11260.1B7  | 3.11260.1E9 |             |             |  |
| AT3G16280 | Integrase-type DNA-binding superfamily protein                    | 3.16280.1A4 | 3.16280.1B3  |             |             |             |  |
| AT3G23240 | ATERF1_ERF1__ethylene response factor 1                           | 3.23240.1D4 | 3.23240.1I2  |             |             |             |  |
| AT4G13640 | UNE16__Homeodomain-like superfamily protein                       | 4.13640.1C3 | 4.13640.1D5  | 4.13640.1G5 | 4.13640.1I1 |             |  |
| AT4G28270 | ATRMA2_RMA2__RING membrane-anchor 2                               | 4.28270.1B6 | 4.28270.1C6  | 4.28270.1E6 | 4.28270.1F3 |             |  |
| AT4G35610 | zinc finger (C2H2 type) family protein                            | 4.35610.1A3 | 4.35610.1B3  | 4.35610.1D2 | 4.35610.1F6 |             |  |
| AT5G05410 | DREB2_DREB2A__DRE-binding protein 2A                              | 5.05410.1C5 | 5.05410.1E2  | 5.05410.1H5 | 5.05410.1I6 |             |  |
| AT5G17300 | RVE1__Homeodomain-like superfamily protein                        | 5.17300.1A3 | 5.17300.1B9  | 5.17300.1I8 |             |             |  |
| AT5G18450 | Integrase-type DNA-binding superfamily protein                    | 5.18450.1B6 |              |             |             |             |  |
| AT5G20240 | PI__K-box region and MADS-box transcription factor family protein | 5.20240.1A5 | 5.20240.1B6  | 5.20240.1F5 |             |             |  |
| AT5G25890 | IAA28_IAR2__indole-3-acetic acid inducible 28                     | 5.25890.1F4 |              |             |             |             |  |
| AT1G18710 | AtMYB47_MYB47__myb domain protein 47                              | 1.18710.1A9 | 1.18710.1E3  |             |             |             |  |
| AT1G21450 | SCL1__SCARECROW-like 1                                            | 1.21450.1A4 | 1.21450.1D10 | 1.21450.1G9 |             |             |  |
| AT1G47760 | AGL102__AGAMOUS-like 102                                          | 1.47760.1H7 |              |             |             |             |  |
| AT1G66230 | AtMYB20_MYB20__myb domain protein 20                              | 1.66230.1C2 | 1.66230.1G2  |             |             |             |  |
| AT2G18550 | ATHB21_HB-2_HB21__homeobox protein 21                             | 2.18550.1C4 | 2.18550.1E1  | 2.18550.1I4 |             |             |  |
| AT2G22800 | HAT9__Homeobox-leucine zipper protein family                      | 2.22800.1A3 | 2.22800.1B2  | 2.22800.1D1 | 2.22800.1G4 |             |  |
| AT2G31180 | ATMYB14_MYB14_MYB14AT__myb domain protein 14                      | 2.31180.1A1 | 2.31180.1D7  | 2.31180.1G8 |             |             |  |
| AT2G44940 | Integrase-type DNA-binding superfamily protein                    | 2.44940.1A1 | 2.44940.1B6  | 2.44940.1E3 | 2.44940.1F2 | 2.44940.1G5 |  |
| AT2G45660 | AGL20_ATSOC1_SOC1__AGAMOUS-like 20                                | 2.45660.1I5 |              |             |             |             |  |
| AT3G03200 | anac045_NAC045__NAC domain containing protein 45                  | 3.03200.1A4 | 3.03200.1C2  | 3.03200.1G2 |             |             |  |
| AT3G21890 | B-box type zinc finger family protein                             | 3.21890.1A8 | 3.21890.1B5  | 3.21890.1H8 |             |             |  |
| AT4G05100 | AtMYB74_MYB74__myb domain protein 74                              | 4.05100.1D5 | 4.05100.1H9  |             |             |             |  |
| AT4G39070 | B-box zinc finger family protein                                  | 4.39070.1C2 | 4.39070.1E3  | 4.39070.1F9 |             |             |  |

|           |                                                                          |               |              |              |              |              |             |
|-----------|--------------------------------------------------------------------------|---------------|--------------|--------------|--------------|--------------|-------------|
| AT5G05770 | WOX5A_WOX7__WUSCHEL related homeobox 7                                   | 5.05770.1A9   | 5.05770.1B9  | 5.05770.1E8  |              |              |             |
| AT5G15150 | ATHB-3_ATHB3_HAT7_HB-3__homeobox 3                                       | 5.15150.1H3   | 5.15150.1I1  |              |              |              |             |
| AT5G25810 | tny__Integrase-type DNA-binding superfamily protein                      | 5.25810.1B9   | 5.25810.1C9  | 5.25810.1H7  |              |              |             |
| AT5G65230 | AtMYB53_MYB53__myb domain protein 53                                     | 5.65230.1I4   |              |              |              |              |             |
| AT1G15050 | IAA34__indole-3-acetic acid inducible 34                                 | 1.15050.1C6   |              |              |              |              |             |
| AT1G62975 | basic helix-loop-helix (bHLH) DNA-binding superfamily protein            | 1.62975.1A2   | 1.62975.1B2  | 1.62975.1D4  | 1.62975.1F4  | 1.62975.1H4  | 1.62975.1I6 |
| AT1G66350 | RGL_RGL1__RGA-like 1                                                     | 1.66350.1A4   | 1.66350.1E8  | 1.66350.1F3  |              |              |             |
| AT2G03710 | AGL3_SEP4__K-box region and MADS-box transcription factor family protein | 2.03710.1A6   | 2.03710.1E3  | 2.03710.1G5  |              |              |             |
| AT2G33480 | ANAC041_NAC041__NAC domain containing protein 41                         | 2.33480.1G7   | 2.33480.1H1  |              |              |              |             |
| AT2G34140 | Dof-type zinc finger DNA-binding family protein                          | 2.34140.1C6   | 2.34140.1D1  | 2.34140.1G1  | 2.34140.1H1  |              |             |
| AT2G37740 | ATZFP10_ZFP10__zinc-finger protein 10                                    | 2.37740.1A5.6 | 2.37740.1H2  |              |              |              |             |
| AT3G10490 | ANAC051_ANAC052_NAC052__NAC domain containing protein 52                 | 3.10490.1A1   | 3.10490.1C3  | 3.10490.1D3  | 3.10490.1E4  | 3.10490.1F2  | 3.10490.1H3 |
| AT3G10760 | Homeodomain-like superfamily protein                                     | 3.10760.1C7   | 3.10760.1D3  | 3.10760.1E3  |              |              |             |
| AT3G52440 | Dof-type zinc finger DNA-binding family protein                          | 3.52440.1B6   | 3.52440.1D9  | 3.52440.1I4  |              |              |             |
| AT4G03510 | ATRMA1_RMA1__RING membrane-anchor 1                                      | 4.03510.1H5   | 4.03510.1I4  |              |              |              |             |
| AT4G17460 | HAT1__Homeobox-leucine zipper protein 4 (HB-4) / HD-ZIP protein          | 4.17460.1B1   | 4.17460.1C8  | 4.17460.1E8  | 4.17460.1G1  |              |             |
| AT4G36740 | ATHB40_HB-5_HB40__homeobox protein 40                                    | 4.36740.1C6   | 4.36740.1H2  |              |              |              |             |
| AT5G25220 | KNAT3__KNOTTED1-like homeobox gene 3                                     | 5.25220.1A3   | 5.25220.1B1  | 5.25220.1C3  | 5.25220.1E2  | 5.25220.1G3  | 5.25220.1H5 |
| AT5G62380 | ANAC101_NAC101_VND6__NAC-domain protein 101                              | 5.62380.1D3   | 5.62380.1F6  | 5.62380.1G2  |              |              |             |
| AT1G08465 | YAB2__Plant-specific transcription factor YABBY family protein           | 1.08465.1F2   | 1.08465.1H2  | 1.08465.1I7  |              |              |             |
| AT1G08780 | AIP3_PFD4__ABI3-interacting protein 3                                    | 1.08780.1F8   | 1.08780.1I5  |              |              |              |             |
| AT1G14900 | HMGA__high mobility group A HMGA__high mobility group A                  | 1.14900.1C2   | 1.14900.1G9  | 1.14900.1H7  |              |              |             |
| AT1G54330 | ANAC020_NAC020__NAC domain containing protein 20                         | 1.54330.1A10  | 1.54330.1C3  | 1.54330.1I2  |              |              |             |
| AT1G68880 | AtbZIP_bZIP__basic leucine-zipper 8                                      | 1.68880.1A3   | 1.68880.1G5  |              |              |              |             |
| AT2G43000 | anac042_NAC042__NAC domain containing protein 42                         | 2.43000.1D1   | 2.43000.1H2  | 2.43000.1I2  |              |              |             |
| AT3G46640 | LUX_PCL1__Homeodomain-like superfamily protein                           | 3.46640.1C99  | 3.46640.1D99 | 3.46640.1G99 |              |              |             |
| AT3G47620 | AtTCP14_TCP14__TEOSINTE BRANCHED, cycloidea and PCF (TCP) 14             | 3.47620.1D3   | 3.47620.1E7  |              |              |              |             |
| AT3G52270 | Transcription initiation factor IIF, beta subunit                        | 3.52270.1F5   | 3.52270.1H2  | 3.52270.1I1  |              |              |             |
| AT4G08150 | BP_BP1_KNAT1__KNOTTED-like from Arabidopsis thaliana                     | 4.08150.1A4   | 4.08150.1E4  | 4.08150.1F1  | 4.08150.1G12 |              |             |
| AT4G32040 | KNAT5__KNOTTED1-like homeobox gene 5                                     | 4.32040.1F3   | 4.32040.1H5  |              |              |              |             |
| AT4G35280 | DAZ2__C2H2-like zinc finger protein                                      | 4.35280.1A99  | 4.35280.1C99 | 4.35280.1D99 | 4.35280.1F99 | 4.35280.1H99 |             |
| AT4G38000 | DOF4.7__DNA binding with one finger 4.7                                  | 4.38000.1C13  | 4.38000.1E13 |              |              |              |             |
| AT5G08790 | anac081_ATAF2                                                            | 5.08790.1B99  | 5.08790.1H99 |              |              |              |             |
| AT5G15840 | CO_FG__B-box type zinc finger protein with CCT domain                    | 5.15840.1C99  | 5.15840.1F99 | 5.15840.1I99 |              |              |             |
| AT5G45580 | Homeodomain-like superfamily protein                                     | 5.45580.1B99  | 5.45580.1C99 | 5.45580.1G99 |              |              |             |
| AT5G64810 | ATWRKY51_WRKY51__WRKY DNA-binding protein 51                             | 5.64810.1F3   | 5.64810.1G1  | 5.64810.1H1  |              |              |             |

|           |                                                                    |              |              |              |              |  |
|-----------|--------------------------------------------------------------------|--------------|--------------|--------------|--------------|--|
| AT1G06040 | BBX24_STO__B-box zinc finger family protein                        | 1.06040.1C6  |              |              |              |  |
| AT1G06850 | AtbZIP52_bZIP52__basic leucine-zipper 52                           | 1.06850.1B2  | 1.06850.1C9  | 1.06850.1G9  |              |  |
| AT1G26960 | AtHB23_HB23__homeobox protein 23                                   | 1.26960.1A9  | 1.26960.1F9  | 1.26960.1H8  |              |  |
| AT1G54140 | TAF9_TAFII21__TATA binding protein associated factor 21kDa subunit | 1.54140.1D2  | 1.54140.1E1  |              |              |  |
| AT1G66600 | ABO3_ATWRKY63_WRKY63__ABA overly sensitive mutant 3                | 1.66600.1F5  | 1.66600.1G5  |              |              |  |
| AT2G04038 | AtbZIP48_bZIP48__basic leucine-zipper 48                           | 2.04038.1C9  | 2.04038.1F9  |              |              |  |
| AT2G36610 | ATHB22_HB22__homeobox protein 22                                   | 2.36610.1E5  | 2.36610.1F4  | 2.36610.1H3  |              |  |
| AT3G04030 | Homeodomain-like superfamily protein                               | 3.04030.3C5  | 3.04030.3D1  | 3.04030.3F4  |              |  |
| AT3G12890 | ASML2__activator of spomin::LUC2                                   | 3.12890.1A9  | 3.12890.1D7  | 3.12890.1I2  |              |  |
| AT3G13540 | ATMYB5_MYB5__myb domain protein 5                                  | 3.13540.1B1  | 3.13540.1D4  | 3.13540.1F5  |              |  |
| AT3G21880 | B-box type zinc finger protein with CCT domain                     | 3.21880.1A1  | 3.21880.1E5  |              |              |  |
| AT3G57480 | zinc finger (C2H2 type, AN1-like) family protein                   | 3.57480.1C9  | 3.57480.1D5  | 3.57480.1I1  |              |  |
| AT3G61890 | ATHB-12_ATHB12_HB-12__homeobox 12                                  | 3.61890.1A3  | 3.61890.1B3  |              |              |  |
| AT4G08250 | GRAS family transcription factor                                   | 4.08250.1B99 | 4.08250.1C99 | 4.08250.1G99 | 4.08250.1H99 |  |
| AT4G15250 | B-box type zinc finger protein with CCT domain                     | 4.15250.1E9  | 4.15250.1G6  |              |              |  |
| AT4G21050 | Dof-type zinc finger domain-containing protein                     | 4.21050.1C9  | 4.21050.1G6  |              |              |  |
| AT5G60890 | ATMYB34_ATR1_MYB34__myb domain protein 34                          | 5.60890.1C6  | 5.60890.1D9  | 5.60890.1H9  |              |  |
| AT5G64060 | anac103_NAC103__NAC domain containing protein 103                  | 5.64060.1E99 | 5.64060.1G99 | 5.64060.1H3  | 5.64060.1I99 |  |
| AT1G08320 | bZIP21_TGA9__bZIP transcription factor family protein              | 1.08320.1F3  | 1.08320.1G8  | 1.08320.1I9  |              |  |
| AT1G13600 | AtbZIP58_bZIP58__basic leucine-zipper 58                           | 1.13600.1C3  | 1.13600.1G7  | 1.13600.1I7  |              |  |
| AT1G20693 | HMG BETA 1_HMGB2_NFD02_NFD2__high mobility group B2                | 1.20693.1E4  | 1.20693.1F1  | 1.20693.1H9  |              |  |
| AT1G28520 | ATVOZ1_VOZ1__vascular plant one zinc finger protein                | 1.28520.1A1  | 1.28520.1D2  | 1.28520.1F3  |              |  |
| AT1G59640 | BPE_BPEp_BPEub_ZCW32__BIG PETAL P                                  | 1.59640.1E7  | 1.59640.1F5  | 1.59640.1G6  |              |  |
| AT1G75510 | Transcription initiation factor IIF, beta subunit                  | 1.75510.1B99 | 1.75510.1C99 | 1.75510.1E99 | 1.75510.1G99 |  |
| AT2G01060 | myb-like HTH transcriptional regulator family protein              | 2.01060.1A1  | 2.01060.1F7  | 2.01060.1G7  |              |  |
| AT3G18990 | REM39_VRN1__AP2/B3-like transcriptional factor family protein      | 3.18990.1A3  | 3.18990.1C1  | 3.18990.1H1  |              |  |
| AT3G30260 | AGL79__AGAMOUS-like 79                                             | 3.30260.1B6  | 3.30260.1E9  | 3.30260.1H2  |              |  |
| AT3G50650 | GRAS family transcription factor                                   | 3.50650.1A4  | 3.50650.1B4  | 3.50650.1E1  | 3.50650.1I6  |  |
| AT3G56530 | anac064_NAC064__NAC domain containing protein 64                   | 3.56530.1C5  | 3.56530.1E6  | 3.56530.1F1  |              |  |
| AT4G17230 | SCL13__SCARECROW-like 13                                           | 4.17230.1A2  | 4.17230.1C6  | 4.17230.1D5  |              |  |
| AT4G35570 | HMGB5_HMGD_NFD05_NFD5__high mobility group B5                      | 4.35570.1B8  | 4.35570.1D3  | 4.35570.1I4  |              |  |
| AT4G37750 | ANT_CKC_CKC1_DRG__Integrase-type DNA-binding superfamily protein   | 4.37750.1A8  | 4.37750.1E7  | 4.37750.1F2  |              |  |
| AT5G48150 | PAT1__GRAS family transcription factor                             | 5.48150.1A99 | 5.48150.1G15 | 5.48150.1H99 |              |  |
| AT5G48250 | B-box type zinc finger protein with CCT domain                     | 5.48250.1B6  | 5.48250.1C2  | 5.48250.1G1  |              |  |
| AT5G60850 | OBP4__OBF binding protein 4                                        | 5.60850.1B5  | 5.60850.1C7  | 5.60850.1G9  |              |  |
| AT5G65590 | Dof-type zinc finger DNA-binding family protein                    | 5.65590.1F99 | 5.65590.1I99 |              |              |  |

|           |                                                                   |              |              |              |             |  |
|-----------|-------------------------------------------------------------------|--------------|--------------|--------------|-------------|--|
| AT1G08810 | AtMYB60_MYB60__myb domain protein 60                              | 1.08810.1C1  | 1.08810.1H2  |              |             |  |
| AT1G25440 | B-box type zinc finger protein with CCT domain                    | 1.25440.1B4  | 1.25440.1E7  | 1.25440.1H9  |             |  |
| AT1G27730 | STZ_ZAT10__salt tolerance zinc finger                             | 1.27730.1E5  | 1.27730.1I1  |              |             |  |
| AT1G42990 | ATBZIP60_BZIP60_BZIP60__basic region/leucine zipper motif 60      | 1.42990.1A2  | 1.42990.1D8  |              |             |  |
| AT1G43160 | RAP2.6__related to AP2 6                                          | 1.43160.1E4  | 1.43160.1H2  | 1.43160.1I1  |             |  |
| AT1G51600 | GATA28_TIFY2A_ZML2__ZIM-LIKE 2                                    | 1.51600.2B99 | 1.51600.2E99 | 1.51600.2G99 |             |  |
| AT1G56170 | ATHAP5B_HAP5B_NF-YC2__nuclear factor Y, subunit C2                | 1.56170.1C99 | 1.56170.1F99 | 1.56170.1H99 |             |  |
| AT1G59530 | ATBZIP4_bZIP4__basic leucine-zipper 4                             | 1.59530.1B1  | 1.59530.1E1  | 1.59530.1G2  |             |  |
| AT1G60250 | B-box zinc finger family protein                                  | 1.60250.1A99 | 1.60250.1C99 | 1.60250.1H99 |             |  |
| AT1G69690 | AtTCP15_TCP15__TCP family transcription factor                    | 1.69690.1A9  | 1.69690.1B1  | 1.69690.1C1  |             |  |
| AT2G20570 | ATGLK1_GLK1_GPRI1__GBF's pro-rich region-interacting factor 1     | 2.20570.1B4  |              |              |             |  |
| AT2G31720 | Domain of unknown function (DUF313)                               | 2.31720.1A99 | 2.31720.1C99 | 2.31720.1D99 |             |  |
| AT2G43220 | Cysteine/Histidine-rich C1 domain family protein                  | 2.43220.1B9  | 2.43220.1G9  | 2.43220.1H1  |             |  |
| AT3G61910 | ANAC066_NAC066_NST2__NAC domain protein 66                        | 3.61910.1B2  | 3.61910.1H3  | 3.61910.1I4  |             |  |
| AT4G38140 | RING/U-box superfamily protein                                    | 4.38140.1F7  |              |              |             |  |
| AT5G50470 | NF-YC7__nuclear factor Y, subunit C7                              | 5.50470.1A1  | 5.50470.1B8  | 5.50470.1D11 | 5.50470.1E5 |  |
| AT5G53980 | ATHB52_HB52__homeobox protein 52                                  | 5.53980.1E5  | 5.53980.1F2  | 5.53980.1G2  |             |  |
| AT1G17310 | MADS-box transcription factor family protein                      | 1.17310.1A5  | 1.17310.1F1  |              |             |  |
| AT1G25340 | AtMYB116_MYB116__myb domain protein 116                           | 1.25340.1D7  |              |              |             |  |
| AT1G59750 | ARF1__auxin response factor 1                                     | 1.59750.1B3  | 1.59750.1C5  |              |             |  |
| AT2G31380 | STH__salt tolerance homologue                                     | 2.31380.1A3  | 2.31380.1B1  | 2.31380.1F3  |             |  |
| AT2G40340 | AtERF48_DREB2C__Integrase-type DNA-binding superfamily protein    | 2.40340.1H5  |              |              |             |  |
| AT2G47700 | RFI2__RING/U-box superfamily protein                              | 2.47700.1E1  | 2.47700.1G4  | 2.47700.1I2  |             |  |
| AT3G13445 | TBP1_TFIID-1__TATA binding protein 1                              | 3.13445.1A1  | 3.13445.1D1  | 3.13445.1F4  |             |  |
| AT3G21270 | ADOF2_DOF2__DOF zinc finger protein 2                             | 3.21270.1H1  | 3.21270.1I1  |              |             |  |
| AT4G30935 | ATWRKY32_WRKY32__WRKY DNA-binding protein 32                      | 4.30935.1H6  | 4.30935.1I8  |              |             |  |
| AT4G38960 | B-box type zinc finger family protein                             | 4.38960.1A3  | 4.38960.1G3  |              |             |  |
| AT5G04640 | AGL99__AGAMOUS-like 99                                            | 5.04640.1A6  | 5.04640.1D6  |              |             |  |
| AT5G13330 | Rap2.6L__related to AP2 6l                                        | 5.13330.1D9  | 5.13330.1G9  | 5.13330.1I4  |             |  |
| AT5G26990 | Drought-responsive family protein                                 | 5.26990.1C10 | 5.26990.1E6  |              |             |  |
| AT5G47220 | ATERF-2_ATERF2_ERF2__ethylene responsive element binding factor 2 | 5.47220.1A7  | 5.47220.1G3  |              |             |  |
| AT5G50490 | NF-YC5__nuclear factor Y, subunit C5                              | 5.50490.1B6  | 5.50490.1F8  | 5.50490.1H9  |             |  |
| AT5G57620 | AtMYB36_MYB36__myb domain protein 36                              | 5.57620.1C3  | 5.57620.1F4  |              |             |  |
| AT5G66940 | Dof-type zinc finger DNA-binding family protein                   | 5.66940.1D4  | 5.66940.1H6  |              |             |  |
| AT1G01010 | ANAC001_NAC001__NAC domain containing protein 1                   | 1.01010.1E5  | 1.01010.1F9  | 1.01010.1G3  |             |  |
| AT1G09530 | PAP3_PIF3_POC1__phytochrome interacting factor 3                  | 1.09530.1F4  |              |              |             |  |

|           |                                                                                                       |             |             |             |             |  |
|-----------|-------------------------------------------------------------------------------------------------------|-------------|-------------|-------------|-------------|--|
| AT1G12610 | DDF1__Integrase-type DNA-binding superfamily protein                                                  | 1.12610.1B2 | 1.12610.1D9 | 1.12610.1E4 |             |  |
| AT1G13300 | HRS1__myb-like transcription factor family protein                                                    | 1.13300.1A9 | 1.13300.1D3 | 1.13300.1E5 |             |  |
| AT1G18570 | AtMYB51_BW51A_BW51B_HIG1_MYB51__myb domain protein 51                                                 | 1.18570.1F7 |             |             |             |  |
| AT1G56650 | ATMYB75_MYB75_PAP1_SIAA1__production of anthocyanin pigment 1                                         | 1.56650.1C5 | 1.56650.1H3 |             |             |  |
| AT1G68190 | B-box zinc finger family protein                                                                      | 1.68190.1D1 |             |             |             |  |
| AT1G71030 | ATMYBL2_MYBL2__MYB-like 2                                                                             | 1.71030.1C5 | 1.71030.1H9 |             |             |  |
| AT1G74930 | ORA47__Integrase-type DNA-binding superfamily protein                                                 | 1.74930.1E2 | 1.74930.1F8 | 1.74930.1H4 |             |  |
| AT2G13570 | NF-YB7__nuclear factor Y, subunit B7                                                                  | 2.13570.1A1 | 2.13570.1C3 | 2.13570.1I2 |             |  |
| AT2G22200 | Integrase-type DNA-binding superfamily protein                                                        | 2.22200.1B1 | 2.22200.1E7 | 2.22200.1G8 |             |  |
| AT2G40970 | MYBC1__Homeodomain-like superfamily protein                                                           | 2.40970.1F1 | 2.40970.1H3 |             |             |  |
| AT3G28910 | ATMYB30_MYB30__myb domain protein 30                                                                  | 3.28910.1C1 | 3.28910.1E5 |             |             |  |
| AT4G18020 | APRR2_PRR2__CheY-like two-component responsive regulator family protein                               | 4.18020.1B9 | 4.18020.1F4 |             |             |  |
| AT4G22680 | AtMYB85_MYB85__myb domain protein 85                                                                  | 4.22680.1F1 |             |             |             |  |
| AT4G29080 | IAA27_PAP2__phytochrome-associated protein 2                                                          | 4.29080.1B2 | 4.29080.1I5 |             |             |  |
| AT5G62320 | ATMYB99_ATMYBCU15_MYB99__myb domain protein 99                                                        | 5.62320.1B8 | 5.62320.1C5 | 5.62320.1G1 |             |  |
| AT5G67190 | DEAR2__DREB and EAR motif protein 2                                                                   | 5.67190.1C4 | 5.67190.1F5 | 5.67190.1G6 |             |  |
| AT1G17590 | NF-YA8__nuclear factor Y, subunit A8                                                                  | 1.17590.1B5 | 1.17590.1F5 |             |             |  |
| AT1G68920 | basic helix-loop-helix (bHLH) DNA-binding superfamily protein                                         | 1.68920.2A4 | 1.68920.2F3 |             |             |  |
| AT1G69120 | AGL7_API__K-box region and MADS-box transcription factor family protein                               | 1.69120.1B3 | 1.69120.1D2 |             |             |  |
| AT1G69780 | ATHB13__Homeobox-leucine zipper protein family                                                        | 1.69780.1D6 | 1.69780.1F9 | 1.69780.1H2 |             |  |
| AT1G71930 | ANAC030_VND7__vascular related NAC-domain protein 7                                                   | 1.71930.1B4 | 1.71930.1C9 | 1.71930.1F9 |             |  |
| AT1G73410 | ATMYB54_MYB54__myb domain protein 54                                                                  | 1.73410.1G9 | 1.73410.1H6 |             |             |  |
| AT1G75410 | BLH3__BEL1-like homeodomain 3                                                                         | 1.75410.2B7 | 1.75410.2C5 | 1.75410.2D6 |             |  |
| AT1G77850 | ARF17__auxin response factor 17                                                                       | 1.77850.1A5 | 1.77850.1G5 | 1.77850.1I7 |             |  |
| AT2G20400 | myb-like HTH transcriptional regulator family protein                                                 | 2.20400.1B1 | 2.20400.1C9 | 2.20400.1I9 |             |  |
| AT2G44910 | ATHB-4_ATHB4_HB4__homeobox-leucine zipper protein 4                                                   | 2.44910.1A3 | 2.44910.1C5 | 2.44910.1G6 |             |  |
| AT3G12730 | Homeodomain-like superfamily protein                                                                  | 3.12730.1D5 | 3.12730.1E3 | 3.12730.1F2 |             |  |
| AT3G29035 | ANAC059_ATNAC3_NAC3_OR51__NAC domain containing protein 3                                             | 3.29035.1C2 | 3.29035.1D9 | 3.29035.1H8 | 3.29035.1I2 |  |
| AT3G61250 | AtMYB17_LMI2_MYB17__myb domain protein 17                                                             | 3.61250.1A6 | 3.61250.1F4 | 3.61250.1G2 | 3.61250.1I3 |  |
| AT4G01250 | AtWRKY22_WRKY22__WRKY family transcription factor                                                     | 4.01250.1C4 | 4.01250.1E9 | 4.01250.1F1 |             |  |
| AT4G02220 | zinc finger (MYND type) family protein / programmed cell death 2 C-terminal domain-containing protein | 4.02220.1C6 | 4.02220.1E5 | 4.02220.1G5 | 4.02220.1H4 |  |
| AT5G29000 | PHL1__Homeodomain-like superfamily protein                                                            | 5.29000.1C3 | 5.29000.1D9 | 5.29000.1G5 |             |  |
| AT5G46590 | anac096_NAC096__NAC domain containing protein 96                                                      | 5.46590.1D5 | 5.46590.1G6 | 5.46590.1I5 |             |  |
| AT5G57660 | ATCOL5_COL5__CONSTANS-like 5                                                                          | 5.57660.1A3 | 5.57660.1B9 | 5.57660.1H4 |             |  |
| AT1G08010 | GATA11__GATA transcription factor 11                                                                  | 1.08010.2H4 |             |             |             |  |



|           |                                                                           |              |              |              |              |  |
|-----------|---------------------------------------------------------------------------|--------------|--------------|--------------|--------------|--|
| AT1G25560 | EDF1_TEM1_AP2/B3 transcription factor family protein                      | 1.25560.1C1  | 1.25560.1F2  |              |              |  |
| AT1G44830 | Integrase-type DNA-binding superfamily protein                            | 1.44830.1A99 | 1.44830.1F99 | 1.44830.1G99 |              |  |
| AT1G48000 | AtMYB112_MYB112_myb domain protein 112                                    | 1.48000.2B9  | 1.48000.2C8  | 1.48000.2H1  |              |  |
| AT1G78600 | BBX22_DBB3_LZF1_STH3_light-regulated zinc finger protein 1                | 1.78600.1D3  | 1.78600.1E8  | 1.78600.1F9  |              |  |
| AT2G28910 | CXIP4_CAX interacting protein 4                                           | 2.28910.1C6  | 2.28910.1D3  | 2.28910.1E3  |              |  |
| AT2G31370 | Basic-leucine zipper (bZIP) transcription factor family protein           | 2.31370.1B7  | 2.31370.1D8  |              |              |  |
| AT2G33290 | ATSUVH2_SDG3_SUVH2_SU(VAR)3-9 homolog 2                                   | 2.33290.1A8  | 2.33290.1G7  | 2.33290.1H7  |              |  |
| AT3G04450 | Homeodomain-like superfamily protein                                      | 3.04450.1C7  | 3.04450.1F7  |              |              |  |
| AT3G25730 | EDF3_ethylene response DNA binding factor 3                               | 3.25730.1A5  | 3.25730.1G6  |              |              |  |
| AT3G49690 | ATMYB84_MYB84_RAX3_myb domain protein 84                                  | 3.49690.1A3  |              |              |              |  |
| AT3G49950 | GRAS family transcription factor                                          | 3.49950.1F3  |              |              |              |  |
| AT3G55730 | AtMYB109_MYB109_myb domain protein 109                                    | 3.55730.1A8  | 3.55730.1F9  | 3.55730.1G1  |              |  |
| AT5G02460 | Dof-type zinc finger DNA-binding family protein                           | 5.02460.1D2  |              |              |              |  |
| AT5G41570 | ATWRKY24_WRKY24_WRKY DNA-binding protein 24                               | 5.41570.1B1  | 5.41570.1F7  |              |              |  |
| AT5G47140 | GATA27_GATA transcription factor 27                                       | 5.47140.1A99 | 5.47140.1C99 | 5.47140.1F99 | 5.47140.1I99 |  |
| AT5G63470 | NF-YC4_nuclear factor Y, subunit C4                                       | 5.63470.1A4  | 5.63470.1B9  | 5.63470.1F1  |              |  |
| AT5G66700 | ATHB53_HB-8_HB53_homeobox 53                                              | 5.66700.1E7  | 5.66700.1G2  | 5.66700.1H9  |              |  |
| AT1G14900 | HMGA_high mobility group A HMGA_high mobility group A                     | 1.14900.1B9  | 1.14900.1D5  | 1.14900.1I7  |              |  |
| AT1G55520 | ATTBP2_TBP2_TATA binding protein 2                                        | 1.55520.2A3  | 1.55520.2D1  |              |              |  |
| AT1G65360 | AGL23_AGAMOUS-like 23                                                     | 1.65360.1A5  | 1.65360.1G2  | 1.65360.1H1  |              |  |
| AT1G68640 | PAN_bZIP transcription factor family protein                              | 1.68640.1E9  | 1.68640.1F6  |              |              |  |
| AT1G77920 | bZIP transcription factor family protein                                  | 1.77920.1B3  | 1.77920.1E1  | 1.77920.1G3  | 1.77920.1H2  |  |
| AT2G04890 | SCL21_SCARECROW-like 21                                                   | 2.04890.1C5  | 2.04890.1F5  |              |              |  |
| AT2G45160 | ATHAM1_HAM1_LOM1_GRAS family transcription factor                         | 2.45160.1C3  | 2.45160.1E1  | 2.45160.1H4  |              |  |
| AT3G30530 | ATBZIP42_bZIP42_basic leucine-zipper 42                                   | 3.30530.1C2  | 3.30530.1E3  |              |              |  |
| AT3G46090 | ZAT7_C2H2 and C2HC zinc fingers superfamily protein                       | 3.46090.1B99 | 3.46090.1E99 | 3.46090.1H99 | 3.46090.1I99 |  |
| AT3G53200 | AtMYB27_MYB27_myb domain protein 27                                       | 3.53200.1F2  |              |              |              |  |
| AT4G24540 | AGL24_AGAMOUS-like 24                                                     | 4.24540.1G2  | 4.24540.1I5  |              |              |  |
| AT5G04940 | SUVH1_SU(VAR)3-9 homolog 1                                                | 5.04940.2D9  | 5.04940.2G4  |              |              |  |
| AT5G09740 | HAM2_histone acetyltransferase of the MYST family 2                       | 5.09740.2D2  | 5.09740.2I9  |              |              |  |
| AT5G17490 | AtRGL3_RGL3_RGA-like protein 3                                            | 5.17490.1C4  | 5.17490.1E9  | 5.17490.1F2  |              |  |
| AT5G27910 | NF-YC8_nuclear factor Y, subunit C8                                       | 5.27910.1D2  | 5.27910.1G1  |              |              |  |
| AT5G35550 | ATMYB123_ATTT2_MYB123_TT2_Duplicated homeodomain-like superfamily protein | 5.35550.1A4  | 5.35550.1C7  |              |              |  |
| AT5G49420 | MADS-box transcription factor family protein                              | 5.49420.1A3  | 5.49420.1B3  | 5.49420.1H1  |              |  |
| AT5G67060 | HEC1_basic helix-loop-helix (bHLH) DNA-binding superfamily protein        | 5.67060.1A1  | 5.67060.1B5  | 5.67060.1F7  |              |  |
| AT1G29160 | Dof-type zinc finger DNA-binding family protein                           | 1.29160.1B3  | 1.29160.1F3  | 1.29160.1G7  |              |  |

|           |                                                                          |              |              |              |                       |              |              |
|-----------|--------------------------------------------------------------------------|--------------|--------------|--------------|-----------------------|--------------|--------------|
| AT1G59810 | AGL50__AGAMOUS-like 50                                                   | 1.59810.1D6  |              |              |                       |              |              |
| AT1G71520 | Integrase-type DNA-binding superfamily protein                           | 1.71520.1A3  |              |              |                       |              |              |
| AT2G32460 | ATM1_ATMYB101_MYB101__myb domain protein 101                             | 2.32460.1F3  |              |              |                       |              |              |
| AT2G34000 | RING/U-box superfamily protein                                           | 2.34000.1A5  | 2.34000.1H6  |              |                       |              |              |
| AT2G36450 | HRD__Integrase-type DNA-binding superfamily protein                      | 2.36450.1E6  | 2.36450.1G6  |              |                       |              |              |
| AT2G46960 | CYP709B1__cytochrome P450, family 709, subfamily B, polypeptide 1        | 2.46960.1B3  | 2.46960.1I5  | 2.46960.1K5  |                       |              |              |
| AT2G47190 | ATMYB2_MYB2__myb domain protein 2                                        | 2.47190.1H3  |              |              |                       |              |              |
| AT3G02310 | AGL4_SEP2__K-box region and MADS-box transcription factor family protein | 3.02310.1E1  | 3.02310.1F1  | 3.02310.1H1  |                       |              |              |
| AT3G03550 | RING/U-box superfamily protein                                           | 3.03550.1B5  |              |              |                       |              |              |
| AT3G49530 | ANAC062_NAC062_NTL6__NAC domain containing protein 62                    | 3.49530.1C9  | 3.49530.1E9  | 3.49530.1H3  |                       |              |              |
| AT4G20280 | TAF11__TBP-associated factor 11                                          | 4.20280.1C99 | 4.20280.1D99 | 4.20280.1H99 | 4.20280.1I99          |              |              |
| AT4G31610 | ATREM1_REM1__Transcriptional factor B3 family protein                    | 4.31610.1B99 | 4.31610.1C99 | 4.31610.1E99 | 4.31610.1F99          | 4.31610.1H99 | 4.31610.1I99 |
| AT5G12870 | ATMYB46_MYB46__myb domain protein 46                                     | 5.12870.1D1  | 5.12870.1E1  | 5.12870.1I1  |                       |              |              |
| AT5G16600 | AtMYB43_MYB43__myb domain protein 43                                     | 5.16600.1F4  |              |              |                       |              |              |
| AT5G28770 | AtbZIP63_BZO2H3__bZIP transcription factor family protein                | 5.28770.1C9  | 5.28770.1H9  | 5.28770.1I8  |                       |              |              |
| AT1G09540 | ATMYB61_MYB61__myb domain protein 61                                     | 1.09540.1B4  | 1.09540.1D5  | 1.09540.1F5  |                       |              |              |
| AT1G33760 | Integrase-type DNA-binding superfamily protein                           | 1.33760.1I99 |              |              |                       |              |              |
| AT1G50680 | AP2/B3 transcription factor family protein                               | 1.50680.1B99 | 1.50680.1D99 | 1.50680.1H99 |                       |              |              |
| AT1G73100 | SDG19_SUVH3__SU(VAR)3-9 homolog 3                                        | 1.73100.1C99 | 1.73100.1E99 | 1.73100.1H99 |                       |              |              |
| AT2G23340 | DEAR3__DREB and EAR motif protein 3                                      | 2.23340.1A3  | 2.23340.1E2  | 2.23340.1F2  |                       |              |              |
| AT2G30250 | ATWRKY25_WRKY25__WRKY DNA-binding protein 25                             | 2.30250.1C5  | 2.30250.1D2  | 2.30250.1F2  |                       |              |              |
| AT2G43010 | AtPIF4_PIF4_SRL2__phytochrome interacting factor 4                       | 2.43010.1B99 | 2.43010.1C99 | 2.43010.1H99 |                       |              |              |
| AT2G45050 | GATA2__GATA transcription factor 2                                       | 2.45050.1A6  | 2.45050.1D6  | 2.45050.1G3  | 2.45050.1I5           |              |              |
| AT2G46830 | AtCCA1_CCA1__circadian clock associated 1                                | 2.46830.2D1  | 2.46830.2E1  | 2.46830.2F4  |                       |              |              |
| AT2G47810 | NF-YB5__nuclear factor Y, subunit B5                                     | 2.47810.1A2  | 2.47810.1B4  | 2.47810.1C1  |                       |              |              |
| AT3G03750 | SDG20_SUVR3__SET domain protein 20                                       | 3.03750.1B99 | 3.03750.1C99 | 3.03750.1E99 | 3.03750.1H99          |              |              |
| AT4G09460 | AtMYB6_MYB6__myb domain protein 6                                        | 4.09460.1A1  | 4.09460.1D1  | 4.09460.1G1  |                       |              |              |
| AT4G14540 | NF-YB3__nuclear factor Y, subunit B3                                     | 4.14540.1A99 | 4.14540.1C99 | 4.14540.1E99 | 4.14540.1I99          |              |              |
| AT4G16610 | C2H2-like zinc finger protein                                            | 4.16610.1A4  | 4.16610.1E6  | 4.16610.1G6  | 4.16610.1I2           |              |              |
| AT4G37260 | ATMYB73_MYB73__myb domain protein 73                                     | 4.37260.1A99 | 4.37260.1B99 | 4.37260.1D99 | 4.37260.1E99          | 4.37260.1G99 |              |
| AT5G26580 | AGL34__AGAMOUS-like-34                                                   | 5.26580.1C4  | 5.26580.1D2  | 5.26580.1G3  | 5.26580.1H2           |              |              |
| AT5G60200 | TMO6__TARGET OF MONOPTEROS 6                                             | 5.60200.1A99 | 5.60200.1E99 | 5.60200.1G99 | Falta el tubo del G99 |              |              |
| AT1G03800 | ATERF10_ERF10__ERF domain protein 10                                     | 1.03800.1A2  | 1.03800.1E5  |              |                       |              |              |
| AT1G08970 | HAP5C_NF-YC9__nuclear factor Y, subunit C9                               | 1.08970.2D5  | 1.08970.2E3  | 1.08970.2I8  |                       |              |              |
| AT1G09030 | NF-YB4__nuclear factor Y, subunit B4                                     | 1.09030.1A1  | 1.09030.1C1  | 1.09030.1F99 |                       |              |              |
| AT1G51120 | AP2/B3 transcription factor family protein                               | 1.51120.1F2  |              |              |                       |              |              |

|           |                                                                          |              |              |             |  |  |  |
|-----------|--------------------------------------------------------------------------|--------------|--------------|-------------|--|--|--|
| AT1G75388 | CPuORF5__conserved peptide upstream open reading frame 5                 | 1.75388.1A2  | 1.75388.1D3  | 1.75388.1H3 |  |  |  |
| AT1G75490 | Integrase-type DNA-binding superfamily protein                           | 1.75490.1B4  |              |             |  |  |  |
| AT1G77200 | Integrase-type DNA-binding superfamily protein                           | 1.77200.1C99 | 1.77200.1H99 |             |  |  |  |
| AT2G34440 | AGL29__AGAMOUS-like 29                                                   | 2.34440.1A2  | 2.34440.1B1  | 2.34440.1C1 |  |  |  |
| AT2G36890 | ATMYB38_BIT1_MYB38_RAX2__Duplicated homeodomain-like superfamily protein | 2.36890.1G2  |              |             |  |  |  |
| AT2G40950 | BZIP17__Basic-leucine zipper (bZIP) transcription factor family protein  | 2.40950.1A2  | 2.40950.1F4  | 2.40950.1H3 |  |  |  |
| AT3G13890 | ATMYB26_MS35_MYB26__myb domain protein 26                                | 3.13890.1E2  | 3.13890.1G1  |             |  |  |  |
| AT3G16500 | IAA26_PAP1__phytochrome-associated protein 1                             | 3.16500.1A6  |              |             |  |  |  |
| AT3G28470 | ATMYB35_TDF1__Duplicated homeodomain-like superfamily protein            | 3.28470.1B99 | 3.28470.1C99 |             |  |  |  |
| AT4G31420 | Zinc finger protein 622                                                  | 4.31420.1E4  | 4.31420.1G2  | 4.31420.1H1 |  |  |  |
| AT5G06500 | AGL96__AGAMOUS-like 96                                                   | 5.06500.1B99 | 5.06500.1G99 |             |  |  |  |
| AT5G23090 | NF-YB13__nuclear factor Y, subunit B13                                   | 5.23090.1D4  | 5.23090.1F6  | 5.23090.1G4 |  |  |  |
| AT5G58890 | AGL82__AGAMOUS-like 82                                                   | 5.58890.1A8  | 5.58890.1D10 | 5.58890.1F6 |  |  |  |

**Supplementary Table S5.** Prediction of S-nitrosylation and nitration sites of potential NO targets

| Protein         | Position    | Peptide                                           | GPS SNO & YNO2 |              | iNitro<br>-Tyr<br>$\Delta$ | iSNO-<br>PseAAC |
|-----------------|-------------|---------------------------------------------------|----------------|--------------|----------------------------|-----------------|
|                 |             |                                                   | Score          | Cutoff       |                            |                 |
| P49333,<br>ETR1 | 4           | ****MEVC <u>N</u> CIEPQW                          | 4.142          | 1.484        |                            |                 |
|                 | 65          | LVQFGAFIVL <u>C</u> GATHLINLWT                    |                |              |                            | (+)             |
|                 | 99          | VLTA <u>V</u> SCATALMLV                           | 3.549          | 2.443        |                            |                 |
|                 | 573         | WIESDGLGK <u>G</u> CTAIFDVKLG                     |                |              |                            | (+)             |
|                 | 634         | VTKGLLVHLG <u>C</u> EVTTVSSNEE                    |                |              |                            | (+)             |
|                 | 661         | KVVFMDV <u>C</u> MPGVENY                          | 2.832          | 2.443        |                            |                 |
|                 | 195         | GLELQLS <u>Y</u> TLRHQHP                          |                |              | 0.556                      |                 |
|                 | 735         | LLEPRVLY <u>E</u> GM****                          | 2.766          | 2.51         |                            |                 |
| Q9S814,<br>EIN2 | 344         | RILAVAPALY <u>C</u> VWTSGADGIY                    |                |              |                            | (+)             |
|                 | 370         | TQVLVAMML <u>P</u> CSVIPLFRIS                     |                |              |                            | (+)             |
|                 | 729         | SFGKDISSGY <u>C</u> MSPTAKGMDS                    |                |              |                            | (+)             |
|                 | <b>1063</b> | <b>LLQSF<u>R</u>H<u>C</u>ILKLIK</b>               | <b>3.505</b>   | <b>2.443</b> |                            |                 |
|                 | <b>1063</b> | <b>EAKLLQSF<u>R</u>H<u>C</u>ILKLIKLEGS</b>        |                |              |                            | (+)             |
|                 | 1141        | ADLIVSFGVW <u>C</u> IHRVLDLSLM                    |                |              |                            | (+)             |
|                 | <b>1218</b> | <b>AKPAKG<u>K</u>CTTAVTLL</b>                     | <b>2.897</b>   | <b>2.443</b> |                            |                 |
|                 | <b>1218</b> | <b>PPAAKPAKG<u>K</u>CTTAVTLLDLI</b>               |                |              |                            | (+)             |
|                 | 32          | LLSVG <u>Y</u> IDPGKWV                            |                |              | 0.072                      |                 |
|                 | 525         | TSVTSSV <u>Y</u> DLPENIL                          | 1.116          | 0.725        |                            |                 |
|                 | 746         | SQMTSS <u>Y</u> DSLKQQR                           | 0.946          | 0.725        |                            |                 |
|                 | <b>783</b>  | <b>RMQMLG<u>A</u>Y<u>G</u>NTTNNN</b>              | <b>1.264</b>   | <b>0.828</b> |                            |                 |
|                 | <b>783</b>  | <b>RMQMLG<u>A</u>Y<u>G</u>NTTNNN</b>              |                |              | <b>0.548</b>               |                 |
|                 | 828         | HGYQM <u>K</u> S <u>Y</u> VDNLAKE                 | 1.674          | 1.065        |                            |                 |
|                 | 859         |                                                   |                |              | 0.012                      |                 |
|                 | 901         | RQSERS <u>Y</u> YGVPSGN                           | 0.757          | 0.725        |                            |                 |
|                 | 984         | RVGV <u>P</u> ST <u>Y</u> DDISQSR                 | 1.114          | 0.828        |                            |                 |
|                 | 1099        |                                                   |                |              | 0.587                      |                 |
|                 | 1161        |                                                   |                |              | 0.542                      |                 |
| B9DFU2,<br>MAX1 | 467         | FIPFGIGPRACV <u>G</u> QRFALQEI                    |                |              |                            | (+)             |
|                 | 147         |                                                   |                |              | 0.066                      |                 |
|                 | 316         | KNIFTSD <u>Y</u> ISAVTYE                          | 1.14           | 1.065        |                            |                 |
|                 | 341         |                                                   |                |              | 0.291                      |                 |
|                 | 409         | KEVEIG <u>G</u> YLLPKGTW                          | 1.4            | 1.065        |                            |                 |
|                 | 504         |                                                   |                |              | 0.322                      |                 |
| Q9SIM9,<br>MAX2 | <b>63</b>   | <b>DLSLV<u>P</u>DC<u>F</u>RSISHL</b>              | <b>2.511</b>   | <b>2.443</b> |                            |                 |
|                 | <b>63</b>   | <b>NARDLSLV<u>P</u>DC<u>F</u>RSISHL<u>D</u>LS</b> |                |              |                            | (+)             |
|                 | 215         | SSEIVSITKSC <u>P</u> NLKTFRVAC                    |                |              |                            | (+)             |
|                 | 317         | GVALEALNSK <u>C</u> KKLRVCLKGQ                    |                |              |                            | (+)             |
|                 | 332         | VLKLGQFQGVCSATEWRRLDG                             |                |              |                            | (+)             |
|                 | 346         | EWRRLDGVAL <u>C</u> GGLQSLSIKN                    |                |              |                            | (+)             |
|                 | 372         | DMGLVAIGR <u>G</u> CCKLTTFEIQG                    |                |              |                            | (+)             |
|                 | 373         | MGLVAIGR <u>G</u> CCKLTTFEIQGC                    |                |              |                            | (+)             |
|                 | 410         | KTLTDVRI <u>S</u> CCKNLDTAASLK                    |                |              |                            | (+)             |
|                 | 426         | AASLKAIE <u>P</u> ICDRIKRLHIDC                    |                |              |                            | (+)             |
|                 | 471         | DDGYERSQK <u>R</u> CKYSFEEHCS                     |                |              |                            | (+)             |
|                 | 536         | EEIRIKIEGDC <u>R</u> GKRRPAEPE                    |                |              |                            | (+)             |
|                 | 551         | RPAEPEFGL <u>S</u> CLALYPKLSKM                    |                |              |                            | (+)             |
|                 | 565         | YPKLSKMQLD <u>C</u> GDTIGFALTA                    |                |              |                            | (+)             |

|                      |            |                                |            |              |              |     |
|----------------------|------------|--------------------------------|------------|--------------|--------------|-----|
|                      | 111        | FVESLN <u>V</u> YTRSPSSL       | 0.865      | 0.828        |              |     |
|                      | 169        |                                |            |              | 1.363        |     |
|                      | 464        | HEEEDDGY <u>E</u> RSQKRC       | 1.189      | 0.725        |              |     |
|                      | 500        |                                |            |              | 0.415        |     |
| Q8VY26,<br>MAX4      | -          | -                              | -          | -            |              |     |
|                      | 79         | EKEKVEGERR <u>C</u> HVAWTSVQQE |            |              |              | (+) |
|                      | 166        | YKAAKKHNRL <u>C</u> YREFSETPKS |            |              |              | (+) |
|                      | 217        | VIKLGDRVM <u>C</u> LTTETQKGSIL |            |              |              | (+) |
|                      | 395        | GKATVIIADC <u>C</u> EHNADTRILD |            |              |              | (+) |
|                      | 474        | LGQKYRYVY <u>A</u> CGAQRPCNFPN |            |              |              | (+) |
|                      | 480        | YVYACGAQR <u>P</u> CNFPNALSQVD |            |              |              | (+) |
|                      | 565        | PYGLPYGLH <u>G</u> CWIPKDXXXXX |            |              |              | (+) |
|                      | 167        |                                |            |              | 0.461        |     |
|                      | 313        |                                |            |              | 0.342        |     |
|                      | 368        |                                |            |              | 1.265        |     |
|                      | 463        |                                |            |              | 1.023        |     |
|                      | 566        |                                |            |              | 0.060        |     |
| Q8S8E3,<br>PYL6      | 61         | HVVGPSQ <u>C</u> FSVVVQD       | 4.196      | 2.443        |              |     |
|                      | 96         | PQAYKHFVK <u>S</u> CHVVIGDGREV |            |              |              | (+) |
|                      | 199        | TCSFADTIVR <u>C</u> NLQSLAKLAE |            |              |              | (+) |
|                      | 89         |                                |            |              | 0.187        |     |
|                      | <b>176</b> | <b>RTRVVE<u>S</u>YVVDVPAG</b>  | <b>1.4</b> | <b>1.065</b> |              |     |
|                      | <b>176</b> |                                |            |              | <b>0.739</b> |     |
| Q1ECF1,<br>PYL7      | 36         | HHCRENQ <u>C</u> TSVLVKY       | 3.549      | 2.443        |              |     |
|                      | 170        | TCYFVESLI <u>K</u> CNLKSLACVSE |            |              |              | (+) |
|                      | 177        | LIKCNLKSL <u>A</u> CVSERLAAQDI |            |              |              | (+) |
|                      | 195        | QDITNSIAT <u>F</u> CNASNGYREKN |            |              |              | (+) |
|                      | 14         | DDTDTE <u>M</u> YGALVTAQ       | 1.405      | 0.725        |              |     |
|                      | 162        |                                |            |              | 0.527        |     |
| Q9LN63,<br>BES1/BZR2 | 62         | AQGNYNLPKH <u>C</u> DNNEVLKALC |            |              |              | (+) |
|                      | -          | -                              | -          | -            |              |     |
|                      | -          | -                              | -          | -            |              |     |
